# Supplementary material for: Conservation status of vascular epiphytes in the Neotropics
Source: Research Square preprint supplement (doi:10.21203/rs.3.rs-2773328/v1), 2023-04-05
Supplement: Supplementary file 1 [file 01b9a84b0ff16b1da65ef10a.xlsx]

## Sheet: Sheet5
id	Family	Species	Source	Previous name
na	Piperaceae	Peperomia berlandieri	Vergara-Rodriguez etal.2017	Peperomia berlandieri
na	Piperaceae	Peperomia circinnata	Vergara-Rodriguez etal.2017	Peperomia circinnata
na	Piperaceae	Peperomia consoquitlana	Vergara-Rodriguez etal.2017	Peperomia consoquitlana
na	Piperaceae	Peperomia cordovana	Vergara-Rodriguez etal.2017	Peperomia cordovana
na	Piperaceae	Peperomia dendrophila	Vergara-Rodriguez etal.2017	Peperomia dendrophila
na	Piperaceae	Peperomia drusophila	Vergara-Rodriguez etal.2017	Peperomia drusophila
na	Piperaceae	Peperomia lindeniana	Vergara-Rodriguez etal.2017	Peperomia lindeniana
na	Piperaceae	Peperomia pellucida	Vergara-Rodriguez etal.2017	Peperomia pellucida
na	Piperaceae	Peperomia serpens	Vergara-Rodriguez etal.2017	Peperomia serpens
na	Piperaceae	Peperomia urocarpoides	Vergara-Rodriguez etal.2017	Peperomia urocarpoides
na	Piperaceae	Peperomia adscendens	FloraMesoamericana	Peperomia adscendens
na	Piperaceae	Peperomia alpina	FloraMesoamericana	Peperomia alpina
na	Piperaceae	Peperomia angustata	FloraMesoamericana	Peperomia angustata
na	Piperaceae	Peperomia arboricola	FloraMesoamericana	Peperomia arboricola
na	Piperaceae	Peperomia argyreia	FloraMesoamericana	Peperomia argyreia
na	Piperaceae	Peperomia candelaber	FloraMesoamericana	Peperomia candelaber
na	Piperaceae	Peperomia ceroderma	FloraMesoamericana	Peperomia ceroderma
na	Piperaceae	Peperomia choroniana	FloraMesoamericana	Peperomia choroniana
na	Piperaceae	Peperomia ciliaris	FloraMesoamericana	Peperomia ciliaris
na	Piperaceae	Peperomia cobana	FloraMesoamericana	Peperomia cobana
na	Piperaceae	Peperomia crispipetiola	FloraMesoamericana	Peperomia crispipetiola
na	Piperaceae	Peperomia cyclophylla	FloraMesoamericana	Peperomia cyclophylla
na	Piperaceae	Peperomia deppeana	FloraMesoamericana	Peperomia deppeana
na	Piperaceae	Peperomia ebingeri	FloraMesoamericana	Peperomia ebingeri
na	Piperaceae	Peperomia elata	FloraMesoamericana	Peperomia elata
na	Piperaceae	Peperomia emarginella	FloraMesoamericana	Peperomia emarginella
na	Piperaceae	Peperomia emiliana	FloraMesoamericana	Peperomia emiliana
na	Piperaceae	Peperomia epidendron	FloraMesoamericana	Peperomia epidendron
na	Piperaceae	Peperomia esperanzana	FloraMesoamericana	Peperomia esperanzana
na	Piperaceae	Peperomia filicaulis	FloraMesoamericana	Peperomia filicaulis
na	Piperaceae	Peperomia galioides	FloraMesoamericana	Peperomia galioides
na	Piperaceae	Peperomia glabella	FloraMesoamericana	Peperomia glabella
na	Piperaceae	Peperomia gleicheniiformis	FloraMesoamericana	Peperomia gleicheniiformis
na	Piperaceae	Peperomia gorgonillana	FloraMesoamericana	Peperomia gorgonillana
na	Piperaceae	Peperomia granulosa	FloraMesoamericana	Peperomia granulosa
na	Piperaceae	Peperomia guatemalensis	FloraMesoamericana	Peperomia guatemalensis
na	Piperaceae	Peperomia hartwegiana	FloraMesoamericana	Peperomia hartwegiana
na	Piperaceae	Peperomia hernandiifolia	FloraMesoamericana	Peperomia hernandiifolia
na	Piperaceae	Peperomia heterophylla	FloraMesoamericana	Peperomia heterophylla
na	Piperaceae	Peperomia hirta	FloraMesoamericana	Peperomia hirta
na	Piperaceae	Peperomia hoffmannii	FloraMesoamericana	Peperomia hoffmannii
na	Piperaceae	Peperomia hygrophiloides	FloraMesoamericana	Peperomia hygrophiloides
na	Piperaceae	Peperomia hylophila	FloraMesoamericana	Peperomia hylophila
na	Piperaceae	Peperomia incisa	FloraMesoamericana	Peperomia incisa
na	Piperaceae	Peperomia jamesoniana	FloraMesoamericana	Peperomia jamesoniana
na	Piperaceae	Peperomia lanceolatopeltata	FloraMesoamericana	Peperomia lanceolatopeltata
na	Piperaceae	Peperomia lancifolia	FloraMesoamericana	Peperomia lancifolia
na	Piperaceae	Peperomia loxensis	FloraMesoamericana	Peperomia loxensis
na	Piperaceae	Peperomia macrostachya	FloraMesoamericana	Peperomia macrostachya
na	Piperaceae	Peperomia magnoliifolia	FloraMesoamericana	Peperomia magnoliifolia
na	Piperaceae	Peperomia martiana	FloraMesoamericana	Peperomia martiana
na	Piperaceae	Peperomia matlalucaensis	FloraMesoamericana	Peperomia matlalucaensis
na	Piperaceae	Peperomia montecristana	FloraMesoamericana	Peperomia montecristana
na	Piperaceae	Peperomia obovalis	FloraMesoamericana	Peperomia obovalis
na	Piperaceae	Peperomia obscurifolia	FloraMesoamericana	Peperomia obscurifolia
na	Piperaceae	Peperomia obtusifolia	FloraMesoamericana	Peperomia obtusifolia
na	Piperaceae	Peperomia ocumarana	FloraMesoamericana	Peperomia ocumarana
na	Piperaceae	Peperomia oerstedii	FloraMesoamericana	Peperomia oerstedii
na	Piperaceae	Peperomia palmana	FloraMesoamericana	Peperomia palmana
na	Piperaceae	Peperomia parastriata	FloraMesoamericana	Peperomia parastriata
na	Piperaceae	Peperomia pecuniifolia	FloraMesoamericana	Peperomia pecuniifolia
na	Piperaceae	Peperomia peltilimba	FloraMesoamericana	Peperomia peltilimba
na	Piperaceae	Peperomia perforata	FloraMesoamericana	Peperomia perforata
na	Piperaceae	Peperomia perglandulosa	FloraMesoamericana	Peperomia perglandulosa
na	Piperaceae	Peperomia pernambucensis	FloraMesoamericana	Peperomia pernambucensis
na	Piperaceae	Peperomia pittieri	FloraMesoamericana	Peperomia pittieri
na	Piperaceae	Peperomia portobellensis	FloraMesoamericana	Peperomia portobellensis
na	Piperaceae	Peperomia pringlei	FloraMesoamericana	Peperomia pringlei
na	Piperaceae	Peperomia pseudoalpina	FloraMesoamericana	Peperomia pseudoalpina
na	Piperaceae	Peperomia pseudopereskiifolia	FloraMesoamericana	Peperomia pseudopereskiifolia
na	Piperaceae	Peperomia quadrangularis	FloraMesoamericana	Peperomia quadrangularis
na	Piperaceae	Peperomia quadrifolia	FloraMesoamericana	Peperomia quadrifolia
na	Piperaceae	Peperomia rhexiifolia	FloraMesoamericana	Peperomia rhexiifolia
na	Piperaceae	Peperomia rhombea	FloraMesoamericana	Peperomia rhombea
na	Piperaceae	Peperomia rotundifolia	FloraMesoamericana	Peperomia rotundifolia
na	Piperaceae	Peperomia saligna	FloraMesoamericana	Peperomia saligna
na	Piperaceae	Peperomia san-felipensis	FloraMesoamericana	Peperomia san-felipensis
na	Piperaceae	Peperomia sanjoseana	FloraMesoamericana	Peperomia sanjoseana
na	Piperaceae	Peperomia santahelenae	FloraMesoamericana	Peperomia santahelenae
na	Piperaceae	Peperomia seemanniana	FloraMesoamericana	Peperomia seemanniana
na	Piperaceae	Peperomia silvivaga	FloraMesoamericana	Peperomia silvivaga
na	Piperaceae	Peperomia striata	FloraMesoamericana	Peperomia striata
na	Piperaceae	Peperomia subblanda	FloraMesoamericana	Peperomia subblanda
na	Piperaceae	Peperomia succulenta	FloraMesoamericana	Peperomia succulenta
na	Piperaceae	Peperomia suchitanensis	FloraMesoamericana	Peperomia suchitanensis
na	Piperaceae	Peperomia syringifolia	FloraMesoamericana	Peperomia syringifolia
na	Piperaceae	Peperomia tenella	FloraMesoamericana	Peperomia tenella
na	Piperaceae	Peperomia tenelliformis	FloraMesoamericana	Peperomia tenelliformis
na	Piperaceae	Peperomia tenerrima	FloraMesoamericana	Peperomia tenerrima
na	Piperaceae	Peperomia tenuicaulis	FloraMesoamericana	Peperomia tenuicaulis
na	Piperaceae	Peperomia tenuipes	FloraMesoamericana	Peperomia tenuipes
na	Piperaceae	Peperomia tequendamana	FloraMesoamericana	Peperomia tequendamana
na	Piperaceae	Peperomia tetraphylla	FloraMesoamericana	Peperomia tetraphylla
na	Piperaceae	Peperomia tonduzii	FloraMesoamericana	Peperomia tonduzii
na	Piperaceae	Peperomia tovariana	FloraMesoamericana	Peperomia tovariana
na	Piperaceae	Peperomia trinervula	FloraMesoamericana	Peperomia trinervula
na	Piperaceae	Peperomia tuerckheimii	FloraMesoamericana	Peperomia tuerckheimii
na	Piperaceae	Peperomia tuisana	FloraMesoamericana	Peperomia tuisana
na	Piperaceae	Peperomia urocarpa	FloraMesoamericana	Peperomia urocarpa
na	Piperaceae	Peperomia ursina	FloraMesoamericana	Peperomia ursina
na	Piperaceae	Peperomia versicolor	FloraMesoamericana	Peperomia versicolor
na	Piperaceae	Peperomia villarrealii	FloraMesoamericana	Peperomia villarrealii
na	Piperaceae	Peperomia vinasiana	FloraMesoamericana	Peperomia vinasiana
1300	Bromeliaceae	Aechmea abbreviata	EpiList (corrected)	Aechmea abbreviata
1302	Bromeliaceae	Aechmea aculeatosepala	EpiList (corrected)	Aechmea aculeatosepala
1303	Bromeliaceae	Aechmea aenigmatica	EpiList (corrected)	Aechmea aenigmatica
1304	Bromeliaceae	Aechmea aguadocensis	EpiList (corrected)	Aechmea aguadocensis
1305	Bromeliaceae	Aechmea aiuruocensis	EpiList (corrected)	Aechmea aiuruocensis
1306	Bromeliaceae	Aechmea alba	EpiList (corrected)	Aechmea alba
1307	Bromeliaceae	Aechmea alegrensis	EpiList (corrected)	Aechmea alegrensis
1309	Bromeliaceae	Aechmea alopecurus	EpiList (corrected)	Aechmea alopecurus
1310	Bromeliaceae	Aechmea altocaririensis	EpiList (corrected)	Aechmea altocaririensis
1311	Bromeliaceae	Aechmea amicorum	EpiList (corrected)	Aechmea amicorum
1312	Bromeliaceae	Aechmea amorimii	EpiList (corrected)	Aechmea amorimii
1313	Bromeliaceae	Aechmea ampla	EpiList (corrected)	Aechmea ampla
1314	Bromeliaceae	Aechmea andersoniana	EpiList (corrected)	Aechmea andersoniana
1315	Bromeliaceae	Aechmea andersonii	EpiList (corrected)	Aechmea andersonii
1316	Bromeliaceae	Aechmea angustifolia	EpiList (corrected)	Aechmea angustifolia
1317	Bromeliaceae	Aechmea anomala	EpiList (corrected)	Aechmea anomala
1318	Bromeliaceae	Aechmea apocalyptica	EpiList (corrected)	Aechmea apocalyptica
1319	Bromeliaceae	Aechmea aquilega	EpiList (corrected)	Aechmea aquilega
1320	Bromeliaceae	Aechmea araneosa	EpiList (corrected)	Aechmea araneosa
1321	Bromeliaceae	Aechmea arenaria	EpiList (corrected)	Aechmea arenaria
1322	Bromeliaceae	Aechmea aripoensis	EpiList (corrected)	Aechmea aripoensis
1323	Bromeliaceae	Aechmea atrovittata	EpiList (corrected)	Aechmea atrovittata
1324	Bromeliaceae	Aechmea avaldoana	EpiList (corrected)	Aechmea avaldoana
1325	Bromeliaceae	Aechmea azurea	EpiList (corrected)	Aechmea azurea
1326	Bromeliaceae	Aechmea bahiana	EpiList (corrected)	Aechmea bahiana
1327	Bromeliaceae	Aechmea bambusoides	EpiList (corrected)	Aechmea bambusoides
1328	Bromeliaceae	Aechmea baudoensis	EpiList (corrected)	Aechmea baudoensis
1329	Bromeliaceae	Aechmea bicolor	EpiList (corrected)	Aechmea bicolor
1330	Bromeliaceae	Aechmea biflora	EpiList (corrected)	Aechmea biflora
1331	Bromeliaceae	Aechmea blanchetiana	EpiList (corrected)	Aechmea blanchetiana
1332	Bromeliaceae	Aechmea blumenavii	EpiList (corrected)	Aechmea blumenavii
1333	Bromeliaceae	Aechmea bocainensis	EpiList (corrected)	Aechmea bocainensis
1334	Bromeliaceae	Aechmea brachyclada	EpiList (corrected)	Aechmea brachyclada
1335	Bromeliaceae	Aechmea brachystachys	EpiList (corrected)	Aechmea brachystachys
1336	Bromeliaceae	Aechmea bracteata	EpiList (corrected)	Aechmea bracteata
1337	Bromeliaceae	Aechmea brassicoides	EpiList (corrected)	Aechmea brassicoides
1338	Bromeliaceae	Aechmea brevicollis	EpiList (corrected)	Aechmea brevicollis
1339	Bromeliaceae	Aechmea bromeliifolia	EpiList (corrected)	Aechmea bromeliifolia
1340	Bromeliaceae	Aechmea burle-marxii	EpiList (corrected)	Aechmea burle-marxii
1341	Bromeliaceae	Aechmea caesia	EpiList (corrected)	Aechmea caesia
1342	Bromeliaceae	Aechmea calyculata	EpiList (corrected)	Aechmea calyculata
1343	Bromeliaceae	Aechmea campanulata	EpiList (corrected)	Aechmea campanulata
1344	Bromeliaceae	Aechmea canaliculata	EpiList (corrected)	Aechmea canaliculata
1345	Bromeliaceae	Aechmea candida	EpiList (corrected)	Aechmea candida
1346	Bromeliaceae	Aechmea cariocae	EpiList (corrected)	Aechmea cariocae
1347	Bromeliaceae	Aechmea carvalhoi	EpiList (corrected)	Aechmea carvalhoi
1348	Bromeliaceae	Aechmea castanea	EpiList (corrected)	Aechmea castanea
1349	Bromeliaceae	Aechmea castelnavii	EpiList (corrected)	Aechmea castelnavii
1350	Bromeliaceae	Aechmea catendensis	EpiList (corrected)	Aechmea catendensis
1351	Bromeliaceae	Aechmea cathcartii	EpiList (corrected)	Aechmea cathcartii
1352	Bromeliaceae	Aechmea caudata	EpiList (corrected)	Aechmea caudata
1353	Bromeliaceae	Aechmea cephaloides	EpiList (corrected)	Aechmea cephaloides
1354	Bromeliaceae	Aechmea chantinii	EpiList (corrected)	Aechmea chantinii
1355	Bromeliaceae	Aechmea coelestis	EpiList (corrected)	Aechmea coelestis
1356	Bromeliaceae	Aechmea colombiana	EpiList (corrected)	Aechmea colombiana
1357	Bromeliaceae	Aechmea comata	EpiList (corrected)	Aechmea comata
1358	Bromeliaceae	Aechmea conferta	EpiList (corrected)	Aechmea conferta
1359	Bromeliaceae	Aechmea confertiflora	EpiList (corrected)	Aechmea confertiflora
1360	Bromeliaceae	Aechmea confusa	EpiList (corrected)	Aechmea confusa
1361	Bromeliaceae	Aechmea conifera	EpiList (corrected)	Aechmea conifera
1362	Bromeliaceae	Aechmea contracta	EpiList (corrected)	Aechmea contracta
1363	Bromeliaceae	Aechmea correia-araujoi	EpiList (corrected)	Aechmea correia-araujoi
1364	Bromeliaceae	Aechmea corymbosa	EpiList (corrected)	Aechmea corymbosa
1365	Bromeliaceae	Aechmea costantinii	EpiList (corrected)	Aechmea costantinii
1366	Bromeliaceae	Aechmea cucullata	EpiList (corrected)	Aechmea cucullata
1367	Bromeliaceae	Aechmea curranii	EpiList (corrected)	Aechmea curranii
1368	Bromeliaceae	Aechmea cylindrata	EpiList (corrected)	Aechmea cylindrata
1369	Bromeliaceae	Aechmea cymosopaniculata	EpiList (corrected)	Aechmea cymosopaniculata
1370	Bromeliaceae	Aechmea dactylina	EpiList (corrected)	Aechmea dactylina
1371	Bromeliaceae	Aechmea dealbata	EpiList (corrected)	Aechmea dealbata
1372	Bromeliaceae	Aechmea decurva	EpiList (corrected)	Aechmea decurva
1373	Bromeliaceae	Aechmea depressa	EpiList (corrected)	Aechmea depressa
1374	Bromeliaceae	Aechmea dichlamydea	EpiList (corrected)	Aechmea dichlamydea
1375	Bromeliaceae	Aechmea digitata	EpiList (corrected)	Aechmea digitata
1376	Bromeliaceae	Aechmea discordiae	EpiList (corrected)	Aechmea discordiae
1377	Bromeliaceae	Aechmea disjuncta	EpiList (corrected)	Aechmea disjuncta
1378	Bromeliaceae	Aechmea distichantha	EpiList (corrected)	Aechmea distichantha
1379	Bromeliaceae	Aechmea downsiana	EpiList (corrected)	Aechmea downsiana
1381	Bromeliaceae	Aechmea echinata	EpiList (corrected)	Aechmea echinata
1382	Bromeliaceae	Aechmea egleriana	EpiList (corrected)	Aechmea egleriana
1383	Bromeliaceae	Aechmea emmerichiae	EpiList (corrected)	Aechmea emmerichiae
1384	Bromeliaceae	Aechmea entringeri	EpiList (corrected)	Aechmea entringeri
1385	Bromeliaceae	Aechmea esseri	EpiList (corrected)	Aechmea esseri
1386	Bromeliaceae	Aechmea eurycorymbus	EpiList (corrected)	Aechmea eurycorymbus
1387	Bromeliaceae	Aechmea farinosa	EpiList (corrected)	Aechmea farinosa
1388	Bromeliaceae	Aechmea fasciata	EpiList (corrected)	Aechmea fasciata
1389	Bromeliaceae	Aechmea fendleri	EpiList (corrected)	Aechmea fendleri
1390	Bromeliaceae	Aechmea fernandae	EpiList (corrected)	Aechmea fernandae
1391	Bromeliaceae	Aechmea ferruginea	EpiList (corrected)	Aechmea ferruginea
1392	Bromeliaceae	Aechmea filicaulis	EpiList (corrected)	Aechmea filicaulis
1393	Bromeliaceae	Aechmea flavorosea	EpiList (corrected)	Aechmea flavorosea
1394	Bromeliaceae	Aechmea flemingii	EpiList (corrected)	Aechmea flemingii
1395	Bromeliaceae	Aechmea floribunda	EpiList (corrected)	Aechmea floribunda
1396	Bromeliaceae	Aechmea fosteriana	EpiList (corrected)	Aechmea fosteriana
1398	Bromeliaceae	Aechmea frassyi	EpiList (corrected)	Aechmea frassyi
1399	Bromeliaceae	Aechmea fraudulosa	EpiList (corrected)	Aechmea fraudulosa
1400	Bromeliaceae	Aechmea froesii	EpiList (corrected)	Aechmea froesii
1401	Bromeliaceae	Aechmea fuerstenbergii	EpiList (corrected)	Aechmea fuerstenbergii
1402	Bromeliaceae	Aechmea fulgens	EpiList (corrected)	Aechmea fulgens
1403	Bromeliaceae	Aechmea gamosepala	EpiList (corrected)	Aechmea gamosepala
1404	Bromeliaceae	Aechmea geminiflora	EpiList (corrected)	Aechmea geminiflora
1405	Bromeliaceae	Aechmea gentryi	EpiList (corrected)	Aechmea gentryi
1407	Bromeliaceae	Aechmea gigantea	EpiList (corrected)	Aechmea gigantea
1408	Bromeliaceae	Aechmea glandulosa	EpiList (corrected)	Aechmea glandulosa
1409	Bromeliaceae	Aechmea gracilis	EpiList (corrected)	Aechmea gracilis
1410	Bromeliaceae	Aechmea grazielae	EpiList (corrected)	Aechmea grazielae
1411	Bromeliaceae	Aechmea guainumbiorum	EpiList (corrected)	Aechmea guainumbiorum
1412	Bromeliaceae	Aechmea guaratingensis	EpiList (corrected)	Aechmea guaratingensis
1413	Bromeliaceae	Aechmea guaratubensis	EpiList (corrected)	Aechmea guaratubensis
1414	Bromeliaceae	Aechmea gurkeniana	EpiList (corrected)	Aechmea gurkeniana
1415	Bromeliaceae	Aechmea gustavoi	EpiList (corrected)	Aechmea gustavoi
1416	Bromeliaceae	Aechmea haltonii	EpiList (corrected)	Aechmea haltonii
1417	Bromeliaceae	Aechmea hellae	EpiList (corrected)	Aechmea hellae
1418	Bromeliaceae	Aechmea heterosepala	EpiList (corrected)	Aechmea heterosepala
1419	Bromeliaceae	Aechmea hoppii	EpiList (corrected)	Aechmea hoppii
1420	Bromeliaceae	Aechmea huebneri	EpiList (corrected)	Aechmea huebneri
1421	Bromeliaceae	Aechmea iguana	EpiList (corrected)	Aechmea iguana
1422	Bromeliaceae	Aechmea incompta	EpiList (corrected)	Aechmea incompta
1424	Bromeliaceae	Aechmea itapoana	EpiList (corrected)	Aechmea itapoana
1425	Bromeliaceae	Aechmea joannis	EpiList (corrected)	Aechmea joannis
1426	Bromeliaceae	Aechmea jungurudoensis	EpiList (corrected)	Aechmea jungurudoensis
1427	Bromeliaceae	Aechmea kautskyana	EpiList (corrected)	Aechmea kautskyana
1428	Bromeliaceae	Aechmea kentii	EpiList (corrected)	Aechmea kentii
1429	Bromeliaceae	Aechmea kertesziae	EpiList (corrected)	Aechmea kertesziae
1430	Bromeliaceae	Aechmea kleinii	EpiList (corrected)	Aechmea kleinii
1431	Bromeliaceae	Aechmea koesteri	EpiList (corrected)	Aechmea koesteri
1432	Bromeliaceae	Aechmea kuntzeana	EpiList (corrected)	Aechmea kuntzeana
1433	Bromeliaceae	Aechmea lactifera	EpiList (corrected)	Aechmea lactifera
1434	Bromeliaceae	Aechmea laevigata	EpiList (corrected)	Aechmea laevigata
1435	Bromeliaceae	Aechmea lamarckei	EpiList (corrected)	Aechmea lamarchei
1436	Bromeliaceae	Aechmea lanata	EpiList (corrected)	Aechmea lanata
1437	Bromeliaceae	Aechmea lanjouwii	EpiList (corrected)	Aechmea lanjouwii
1438	Bromeliaceae	Aechmea lasseri	EpiList (corrected)	Aechmea lasseri
1439	Bromeliaceae	Aechmea leonardkentiana	EpiList (corrected)	Aechmea leonard-kentiana
1440	Bromeliaceae	Aechmea leppardii	EpiList (corrected)	Aechmea leppardii
1441	Bromeliaceae	Aechmea leptantha	EpiList (corrected)	Aechmea leptantha
1442	Bromeliaceae	Aechmea leucolepis	EpiList (corrected)	Aechmea leucolepis
1443	Bromeliaceae	Aechmea lilacinantha	EpiList (corrected)	Aechmea lilacinantha
1444	Bromeliaceae	Aechmea limae	EpiList (corrected)	Aechmea limae
1445	Bromeliaceae	Aechmea lingulata	EpiList (corrected)	Aechmea lingulata
3266	Bromeliaceae	Aechmea lingulata	EpiList (corrected)	Wittmackia lingulatoides
1446	Bromeliaceae	Aechmea lingulatoides	EpiList (corrected)	Aechmea lingulatoides
1447	Bromeliaceae	Aechmea linharesiorum	EpiList (corrected)	Aechmea linharesiorum
1448	Bromeliaceae	Aechmea longicuspis	EpiList (corrected)	Aechmea longicuspis
1449	Bromeliaceae	Aechmea longifolia	EpiList (corrected)	Aechmea longifolia
1450	Bromeliaceae	Aechmea longipedunculata	EpiList (corrected)	Aechmea longipedunculata
1451	Bromeliaceae	Aechmea longiramosa	EpiList (corrected)	Aechmea longiramosa
1452	Bromeliaceae	Aechmea lueddemanniana	EpiList (corrected)	Aechmea lueddemanniana
1453	Bromeliaceae	Aechmea lugoi	EpiList (corrected)	Aechmea lugoi
1454	Bromeliaceae	Aechmea lymanii	EpiList (corrected)	Aechmea lymanii
1455	Bromeliaceae	Aechmea maasii	EpiList (corrected)	Aechmea maasii
1456	Bromeliaceae	Aechmea macrochlamys	EpiList (corrected)	Aechmea macrochlamys
1457	Bromeliaceae	Aechmea maculata	EpiList (corrected)	Aechmea maculata
1458	Bromeliaceae	Aechmea magdalenae	EpiList (corrected)	Aechmea magdalenae
1459	Bromeliaceae	Aechmea manzanaresiana	EpiList (corrected)	Aechmea manzanaresiana
1460	Bromeliaceae	Aechmea maranguapensis	EpiList (corrected)	Aechmea maranguapensis
1461	Bromeliaceae	Aechmea marauensis	EpiList (corrected)	Aechmea marauensis
1462	Bromeliaceae	Aechmea marginalis	EpiList (corrected)	Aechmea marginalis
1463	Bromeliaceae	Aechmea mariae-reginae	EpiList (corrected)	Aechmea mariae-reginae
1464	Bromeliaceae	Aechmea matudae	EpiList (corrected)	Aechmea matudae
1465	Bromeliaceae	Aechmea mcvaughii	EpiList (corrected)	Aechmea mcvaughii
1466	Bromeliaceae	Aechmea melinonii	EpiList (corrected)	Aechmea melinonii
1467	Bromeliaceae	Aechmea mertensii	EpiList (corrected)	Aechmea mertensii
1468	Bromeliaceae	Aechmea mexicana	EpiList (corrected)	Aechmea mexicana
1469	Bromeliaceae	Aechmea milsteiniana	EpiList (corrected)	Aechmea milsteiniana
1470	Bromeliaceae	Aechmea miniata	EpiList (corrected)	Aechmea miniata
1471	Bromeliaceae	Aechmea mira	EpiList (corrected)	Aechmea mira
1472	Bromeliaceae	Aechmea mollis	EpiList (corrected)	Aechmea mollis
1473	Bromeliaceae	Aechmea moonenii	EpiList (corrected)	Aechmea moonenii
1474	Bromeliaceae	Aechmea moorei	EpiList (corrected)	Aechmea moorei
1475	Bromeliaceae	Aechmea multiflora	EpiList (corrected)	Aechmea multiflora
1476	Bromeliaceae	Aechmea murcae	EpiList (corrected)	Aechmea murcae
1477	Bromeliaceae	Aechmea muricata	EpiList (corrected)	Aechmea muricata
1478	Bromeliaceae	Aechmea mutica	EpiList (corrected)	Aechmea mutica
1479	Bromeliaceae	Aechmea nallyi	EpiList (corrected)	Aechmea nallyi
1480	Bromeliaceae	Aechmea napoensis	EpiList (corrected)	Aechmea napoensis
1481	Bromeliaceae	Aechmea nidularioides	EpiList (corrected)	Aechmea nidularioides
1482	Bromeliaceae	Aechmea nigribracteata	EpiList (corrected)	Aechmea nigribracteata
1483	Bromeliaceae	Aechmea nivea	EpiList (corrected)	Aechmea nivea
1484	Bromeliaceae	Aechmea nudicaulis	EpiList (corrected)	Aechmea nudicaulis
1485	Bromeliaceae	Aechmea organensis	EpiList (corrected)	Aechmea organensis
1486	Bromeliaceae	Aechmea orlandiana	EpiList (corrected)	Aechmea orlandiana
1487	Bromeliaceae	Aechmea ornata	EpiList (corrected)	Aechmea ornata
1488	Bromeliaceae	Aechmea pabstii	EpiList (corrected)	Aechmea pabstii
1489	Bromeliaceae	Aechmea pallida	EpiList (corrected)	Aechmea pallida
1490	Bromeliaceae	Aechmea paniculata	EpiList (corrected)	Aechmea paniculata
1491	Bromeliaceae	Aechmea paniculigera	EpiList (corrected)	Aechmea paniculigera
1492	Bromeliaceae	Aechmea paradoxa	EpiList (corrected)	Aechmea paradoxa
1493	Bromeliaceae	Aechmea paratiensis	EpiList (corrected)	Aechmea paratiensis
1494	Bromeliaceae	Aechmea patriciae	EpiList (corrected)	Aechmea patriciae
1495	Bromeliaceae	Aechmea pectinata	EpiList (corrected)	Aechmea pectinata
1496	Bromeliaceae	Aechmea pedicellata	EpiList (corrected)	Aechmea pedicellata
1497	Bromeliaceae	Aechmea penduliflora	EpiList (corrected)	Aechmea penduliflora
1498	Bromeliaceae	Aechmea pernambucentris	EpiList (corrected)	Aechmea pernambucentris
1499	Bromeliaceae	Aechmea pimenti-velosoi	EpiList (corrected)	Aechmea pimenti-velosoi
1500	Bromeliaceae	Aechmea pineliana	EpiList (corrected)	Aechmea pineliana
1501	Bromeliaceae	Aechmea pittieri	EpiList (corrected)	Aechmea pittieri
1502	Bromeliaceae	Aechmea podantha	EpiList (corrected)	Aechmea podantha
1503	Bromeliaceae	Aechmea poitaei	EpiList (corrected)	Aechmea poitaei
1504	Bromeliaceae	Aechmea politii	EpiList (corrected)	Aechmea politii
1505	Bromeliaceae	Aechmea polyantha	EpiList (corrected)	Aechmea polyantha
1506	Bromeliaceae	Aechmea prancei	EpiList (corrected)	Aechmea prancei
1507	Bromeliaceae	Aechmea prava	EpiList (corrected)	Aechmea prava
1508	Bromeliaceae	Aechmea pseudonudicaulis	EpiList (corrected)	Aechmea pseudonudicaulis
1509	Bromeliaceae	Aechmea pubescens	EpiList (corrected)	Aechmea pubescens
1510	Bromeliaceae	Aechmea purpureorosea	EpiList (corrected)	Aechmea purpureorosea
1511	Bromeliaceae	Aechmea pyramidalis	EpiList (corrected)	Aechmea pyramidalis
1512	Bromeliaceae	Aechmea racinae	EpiList (corrected)	Aechmea racinae
1513	Bromeliaceae	Aechmea ramosa	EpiList (corrected)	Aechmea ramosa
1514	Bromeliaceae	Aechmea ramusculosa	EpiList (corrected)	Aechmea ramusculosa
1515	Bromeliaceae	Aechmea reclinata	EpiList (corrected)	Aechmea reclinata
1516	Bromeliaceae	Aechmea recurvata	EpiList (corrected)	Aechmea recurvata
1517	Bromeliaceae	Aechmea recurvipetala	EpiList (corrected)	Aechmea recurvipetala
1518	Bromeliaceae	Aechmea retusa	EpiList (corrected)	Aechmea retusa
1519	Bromeliaceae	Aechmea roberto-anselmoi	EpiList (corrected)	Aechmea roberto-anselmoi
1520	Bromeliaceae	Aechmea roberto-seidelii	EpiList (corrected)	Aechmea roberto-seidelii
1521	Bromeliaceae	Aechmea rodriguesiana	EpiList (corrected)	Aechmea rodriguesiana
1522	Bromeliaceae	Aechmea roeseliae	EpiList (corrected)	Aechmea roeseliae
1523	Bromeliaceae	Aechmea romeroi	EpiList (corrected)	Aechmea romeroi
1524	Bromeliaceae	Aechmea rubens	EpiList (corrected)	Aechmea rubens
1525	Bromeliaceae	Aechmea rubroaristata	EpiList (corrected)	Aechmea rubroaristata
1526	Bromeliaceae	Aechmea rubrolilacina	EpiList (corrected)	Aechmea rubrolilacina
1527	Bromeliaceae	Aechmea saxicola	EpiList (corrected)	Aechmea saxicola
1528	Bromeliaceae	Aechmea seideliana	EpiList (corrected)	Aechmea seideliana
1529	Bromeliaceae	Aechmea seidelii	EpiList (corrected)	Aechmea seidelii
1530	Bromeliaceae	Aechmea sergipana	EpiList (corrected)	Aechmea sergipana
1531	Bromeliaceae	Aechmea serragrandensis	EpiList (corrected)	Aechmea serragrandensis
1532	Bromeliaceae	Aechmea serrata	EpiList (corrected)	Aechmea serrata
1533	Bromeliaceae	Aechmea servitensis	EpiList (corrected)	Aechmea servitensis
1534	Bromeliaceae	Aechmea setigera	EpiList (corrected)	Aechmea setigera
1535	Bromeliaceae	Aechmea smithiorum	EpiList (corrected)	Aechmea smithiorum
1536	Bromeliaceae	Aechmea spectabilis	EpiList (corrected)	Aechmea spectabilis
1537	Bromeliaceae	Aechmea sphaerocephala	EpiList (corrected)	Aechmea sphaerocephala
1539	Bromeliaceae	Aechmea stelligera	EpiList (corrected)	Aechmea stelligera
1540	Bromeliaceae	Aechmea stenosepala	EpiList (corrected)	Aechmea stenosepala
1541	Bromeliaceae	Aechmea streptocalycoides	EpiList (corrected)	Aechmea streptocalycoides
1542	Bromeliaceae	Aechmea strobilacea	EpiList (corrected)	Aechmea strobilacea
1543	Bromeliaceae	Aechmea strobilina	EpiList (corrected)	Aechmea strobilina
1544	Bromeliaceae	Aechmea subintegerrima	EpiList (corrected)	Aechmea subintegerrima
1546	Bromeliaceae	Aechmea sucreana	EpiList (corrected)	Aechmea sucreana
1547	Bromeliaceae	Aechmea sulbahianensis	EpiList (corrected)	Aechmea sulbahianensis
1548	Bromeliaceae	Aechmea tayoensis	EpiList (corrected)	Aechmea tayoensis
1549	Bromeliaceae	Aechmea tentaculifera	EpiList (corrected)	Aechmea tentaculifera
1550	Bromeliaceae	Aechmea tessmannii	EpiList (corrected)	Aechmea tessmannii
1538	Bromeliaceae	Aechmea tillandsioides	EpiList (corrected)	Aechmea squarrosa
1551	Bromeliaceae	Aechmea tillandsioides	EpiList (corrected)	Aechmea tillandsioides
1552	Bromeliaceae	Aechmea tocantina	EpiList (corrected)	Aechmea tocantina
1553	Bromeliaceae	Aechmea tomentosa	EpiList (corrected)	Aechmea tomentosa
1555	Bromeliaceae	Aechmea triangularis	EpiList (corrected)	Aechmea triangularis
1556	Bromeliaceae	Aechmea triticina	EpiList (corrected)	Aechmea triticina
1557	Bromeliaceae	Aechmea tuitensis	EpiList (corrected)	Aechmea tuitensis
1558	Bromeliaceae	Aechmea turbinocalyx	EpiList (corrected)	Aechmea turbinocalyx
1559	Bromeliaceae	Aechmea vallerandi	EpiList (corrected)	Aechmea vallerandii
1560	Bromeliaceae	Aechmea vanhoutteana	EpiList (corrected)	Aechmea van-houtteana
1561	Bromeliaceae	Aechmea vasquezii	EpiList (corrected)	Aechmea vasquezii
1563	Bromeliaceae	Aechmea victoriana	EpiList (corrected)	Aechmea victoriana
1564	Bromeliaceae	Aechmea viridipetala	EpiList (corrected)	Aechmea viridipetala
1566	Bromeliaceae	Aechmea viridostigma	EpiList (corrected)	Aechmea viridostigma
1567	Bromeliaceae	Aechmea warasii	EpiList (corrected)	Aechmea warasii
1569	Bromeliaceae	Aechmea weberi	EpiList (corrected)	Aechmea weberi
1570	Bromeliaceae	Aechmea weilbachii	EpiList (corrected)	Aechmea weilbachii
1571	Bromeliaceae	Aechmea williamsii	EpiList (corrected)	Aechmea williamsii
1572	Bromeliaceae	Aechmea winkleri	EpiList (corrected)	Aechmea winkleri
1573	Bromeliaceae	Aechmea wittmackiana	EpiList (corrected)	Aechmea wittmackiana
1574	Bromeliaceae	Aechmea woronowii	EpiList (corrected)	Aechmea woronowii
1576	Bromeliaceae	Aechmea zebrina	EpiList (corrected)	Aechmea zebrina
3217	Bromeliaceae	Alcantarea vinicolor	EpiList (corrected)	Vriesea vinicolor
1577	Bromeliaceae	Androlepis fragrans	EpiList (corrected)	Androlepis fragrans
1578	Bromeliaceae	Androlepis skinneri	EpiList (corrected)	Androlepis skinneri
1579	Bromeliaceae	Araeococcus chlorocarpus	EpiList (corrected)	Araeococcus chlorocarpus
1580	Bromeliaceae	Araeococcus flagellifolius	EpiList (corrected)	Araeococcus flagellifolius
1581	Bromeliaceae	Araeococcus goeldianus	EpiList (corrected)	Araeococcus goeldianus
1582	Bromeliaceae	Araeococcus micranthus	EpiList (corrected)	Araeococcus micranthus
1583	Bromeliaceae	Araeococcus montanus	EpiList (corrected)	Araeococcus montanus
1584	Bromeliaceae	Araeococcus nigropurpureus	EpiList (corrected)	Araeococcus nigropurpureus
1585	Bromeliaceae	Araeococcus parviflorus	EpiList (corrected)	Araeococcus parviflorus
1586	Bromeliaceae	Araeococcus pectinatus	EpiList (corrected)	Araeococcus pectinatus
1587	Bromeliaceae	Araeococcus sessiliflorus	EpiList (corrected)	Araeococcus sessiliflorus
1588	Bromeliaceae	Billbergia acreana	EpiList (corrected)	Billbergia acreana
1589	Bromeliaceae	Billbergia alfonsi-joannis	EpiList (corrected)	Billbergia alfonsi-joannis
1590	Bromeliaceae	Billbergia amandae	EpiList (corrected)	Billbergia amandae
1591	Bromeliaceae	Billbergia ambigua	EpiList (corrected)	Billbergia ambigua
1592	Bromeliaceae	Billbergia amoena	EpiList (corrected)	Billbergia amoena
1593	Bromeliaceae	Billbergia brachysiphon	EpiList (corrected)	Billbergia brachysiphon
1594	Bromeliaceae	Billbergia bradeana	EpiList (corrected)	Billbergia bradeana
1595	Bromeliaceae	Billbergia brasiliensis	EpiList (corrected)	Billbergia brasiliensis
1596	Bromeliaceae	Billbergia buchholtzii	EpiList (corrected)	Billbergia buchholtzii
1597	Bromeliaceae	Billbergia cardenasii	EpiList (corrected)	Billbergia cardenasii
1598	Bromeliaceae	Billbergia castelensis	EpiList (corrected)	Billbergia castelensis
1599	Bromeliaceae	Billbergia chlorantha	EpiList (corrected)	Billbergia chlorantha
1600	Bromeliaceae	Billbergia chlorostica	EpiList (corrected)	Billbergia chlorostica
1601	Bromeliaceae	Billbergia cylindrostachya	EpiList (corrected)	Billbergia cylindrostachya
1602	Bromeliaceae	Billbergia dasilvae	EpiList (corrected)	Billbergia dasilvae
1603	Bromeliaceae	Billbergia decora	EpiList (corrected)	Billbergia decora
1604	Bromeliaceae	Billbergia distachya	EpiList (corrected)	Billbergia distachya
1605	Bromeliaceae	Billbergia domingosmartinsis	EpiList (corrected)	Billbergia domingosmartinsis
1606	Bromeliaceae	Billbergia elegans	EpiList (corrected)	Billbergia elegans
1607	Bromeliaceae	Billbergia eloisiae	EpiList (corrected)	Billbergia eloisiae
1608	Bromeliaceae	Billbergia euphemiae	EpiList (corrected)	Billbergia euphemiae
1609	Bromeliaceae	Billbergia formosa	EpiList (corrected)	Billbergia formosa
1610	Bromeliaceae	Billbergia horrida	EpiList (corrected)	Billbergia horrida
1611	Bromeliaceae	Billbergia incarnata	EpiList (corrected)	Billbergia incarnata
1612	Bromeliaceae	Billbergia iridifolia	EpiList (corrected)	Billbergia iridifolia
1613	Bromeliaceae	Billbergia issingiana	EpiList (corrected)	Billbergia issingiana
1614	Bromeliaceae	Billbergia jandebrabanderi	EpiList (corrected)	Billbergia jandebrabanderi
1615	Bromeliaceae	Billbergia kuhlmannii	EpiList (corrected)	Billbergia kuhlmannii
1616	Bromeliaceae	Billbergia laxiflora	EpiList (corrected)	Billbergia laxiflora
1617	Bromeliaceae	Billbergia leptopoda	EpiList (corrected)	Billbergia leptopoda
1618	Bromeliaceae	Billbergia lietzei	EpiList (corrected)	Billbergia lietzei
1619	Bromeliaceae	Billbergia lymanii	EpiList (corrected)	Billbergia lymanii
1620	Bromeliaceae	Billbergia macracantha	EpiList (corrected)	Billbergia macracantha
1621	Bromeliaceae	Billbergia macrocalyx	EpiList (corrected)	Billbergia macrocalyx
1622	Bromeliaceae	Billbergia macrolepis	EpiList (corrected)	Billbergia macrolepis
1623	Bromeliaceae	Billbergia magnifica	EpiList (corrected)	Billbergia magnifica
1624	Bromeliaceae	Billbergia manarae	EpiList (corrected)	Billbergia manarae
1625	Bromeliaceae	Billbergia matogrossensis	EpiList (corrected)	Billbergia matogrossensis
1626	Bromeliaceae	Billbergia meyerae	EpiList (corrected)	Billbergia meyeri
1627	Bromeliaceae	Billbergia microlepis	EpiList (corrected)	Billbergia microlepis
1628	Bromeliaceae	Billbergia minarum	EpiList (corrected)	Billbergia minarum
1629	Bromeliaceae	Billbergia morelii	EpiList (corrected)	Billbergia morelii
1630	Bromeliaceae	Billbergia nana	EpiList (corrected)	Billbergia nana
1631	Bromeliaceae	Billbergia nutans	EpiList (corrected)	Billbergia nutans
1632	Bromeliaceae	Billbergia oxysepala	EpiList (corrected)	Billbergia oxysepala
1633	Bromeliaceae	Billbergia pallidiflora	EpiList (corrected)	Billbergia pallidiflora
1634	Bromeliaceae	Billbergia pohliana	EpiList (corrected)	Billbergia pohliana
1635	Bromeliaceae	Billbergia porteana	EpiList (corrected)	Billbergia porteana
1636	Bromeliaceae	Billbergia pyramidalis	EpiList (corrected)	Billbergia pyramidalis
1637	Bromeliaceae	Billbergia reichardtii	EpiList (corrected)	Billbergia reichardtii
1638	Bromeliaceae	Billbergia robert-readii	EpiList (corrected)	Billbergia robert-readii
1639	Bromeliaceae	Billbergia rosea	EpiList (corrected)	Billbergia rosea
1640	Bromeliaceae	Billbergia rubicunda	EpiList (corrected)	Billbergia rubicunda
1641	Bromeliaceae	Billbergia rupestris	EpiList (corrected)	Billbergia rupestris
1642	Bromeliaceae	Billbergia sanderiana	EpiList (corrected)	Billbergia sanderiana
1643	Bromeliaceae	Billbergia sanderiana	EpiList (corrected)	Billbergia saundersiana
1644	Bromeliaceae	Billbergia seidelii	EpiList (corrected)	Billbergia seidelii
1645	Bromeliaceae	Billbergia stenopetala	EpiList (corrected)	Billbergia stenopetala
1646	Bromeliaceae	Billbergia tessmannii	EpiList (corrected)	Billbergia tessmannii
1647	Bromeliaceae	Billbergia tweedieana	EpiList (corrected)	Billbergia tweedieana
1648	Bromeliaceae	Billbergia velascana	EpiList (corrected)	Billbergia velascana
1649	Bromeliaceae	Billbergia violacea	EpiList (corrected)	Billbergia violacea
1650	Bromeliaceae	Billbergia viridiflora	EpiList (corrected)	Billbergia viridiflora
1651	Bromeliaceae	Billbergia vittata	EpiList (corrected)	Billbergia vittata
1652	Bromeliaceae	Billbergia zebrina	EpiList (corrected)	Billbergia zebrina
1653	Bromeliaceae	Brocchinia acuminata	EpiList (corrected)	Brocchinia acuminata
1654	Bromeliaceae	Brocchinia hitchcockii	EpiList (corrected)	Brocchinia hitchcockii
1655	Bromeliaceae	Brocchinia paniculata	EpiList (corrected)	Brocchinia paniculata
1656	Bromeliaceae	Brocchinia tatei	EpiList (corrected)	Brocchinia tatei
1657	Bromeliaceae	Brocchinia vestita	EpiList (corrected)	Brocchinia vestita
1658	Bromeliaceae	Bromelia epiphytica	EpiList (corrected)	Bromelia epiphytica
1659	Bromeliaceae	Canistrum alagoanum	EpiList (corrected)	Canistrum alagoanum
1660	Bromeliaceae	Canistrum ambiguum	EpiList (corrected)	Canistrum ambiguum
1661	Bromeliaceae	Canistrum aurantiacum	EpiList (corrected)	Canistrum aurantiacum
1662	Bromeliaceae	Canistrum auratum	EpiList (corrected)	Canistrum auratum
1663	Bromeliaceae	Canistrum camacaense	EpiList (corrected)	Canistrum camacaense
1664	Bromeliaceae	Canistrum cyathiforme	EpiList (corrected)	Canistrum cyathiforme
1665	Bromeliaceae	Canistrum flavipetalum	EpiList (corrected)	Canistrum flavipetalum
1666	Bromeliaceae	Canistrum fosterianum	EpiList (corrected)	Canistrum fosterianum
1667	Bromeliaceae	Canistrum fragrans	EpiList (corrected)	Canistrum fragrans
1668	Bromeliaceae	Canistrum giganteum	EpiList (corrected)	Canistrum giganteum
1669	Bromeliaceae	Canistrum guzmanioides	EpiList (corrected)	Canistrum guzmanioides
1670	Bromeliaceae	Canistrum improcerum	EpiList (corrected)	Canistrum improcerum
1671	Bromeliaceae	Canistrum lanigerum	EpiList (corrected)	Canistrum lanigerum
1672	Bromeliaceae	Canistrum montanum	EpiList (corrected)	Canistrum montanum
1673	Bromeliaceae	Canistrum paulistanum	EpiList (corrected)	Canistrum paulistanum
1674	Bromeliaceae	Canistrum perplexum	EpiList (corrected)	Canistrum perplexum
1675	Bromeliaceae	Canistrum pickelii	EpiList (corrected)	Canistrum pickelii
1676	Bromeliaceae	Canistrum sandrae	EpiList (corrected)	Canistrum sandrae
1677	Bromeliaceae	Canistrum seidelianum	EpiList (corrected)	Canistrum seidelianum
1678	Bromeliaceae	Canistrum superbum	EpiList (corrected)	Canistrum superbum
1679	Bromeliaceae	Canistrum tenuisepalum	EpiList (corrected)	Canistrum tenuisepalum
1680	Bromeliaceae	Canistrum triangulare	EpiList (corrected)	Canistrum triangulare
1681	Bromeliaceae	Catopsis berteroana	EpiList (corrected)	Catopsis berteroniana
1682	Bromeliaceae	Catopsis compacta	EpiList (corrected)	Catopsis compacta
1683	Bromeliaceae	Catopsis delicatula	EpiList (corrected)	Catopsis delicatula
1684	Bromeliaceae	Catopsis floribunda	EpiList (corrected)	Catopsis floribunda
1685	Bromeliaceae	Catopsis juncifolia	EpiList (corrected)	Catopsis juncifolia
1686	Bromeliaceae	Catopsis micrantha	EpiList (corrected)	Catopsis micrantha
1687	Bromeliaceae	Catopsis minimiflora	EpiList (corrected)	Catopsis minimiflora
1688	Bromeliaceae	Catopsis montana	EpiList (corrected)	Catopsis montana
1689	Bromeliaceae	Catopsis morreniana	EpiList (corrected)	Catopsis morreniana
1690	Bromeliaceae	Catopsis nitida	EpiList (corrected)	Catopsis nitida
1691	Bromeliaceae	Catopsis nutans	EpiList (corrected)	Catopsis nutans
1692	Bromeliaceae	Catopsis occulta	EpiList (corrected)	Catopsis occulta
1693	Bromeliaceae	Catopsis oerstediana	EpiList (corrected)	Catopsis oerstediana
1694	Bromeliaceae	Catopsis paniculata	EpiList (corrected)	Catopsis paniculata
1695	Bromeliaceae	Catopsis pedicellata	EpiList (corrected)	Catopsis pedicellata
1696	Bromeliaceae	Catopsis pisiformis	EpiList (corrected)	Catopsis pisiformis
1697	Bromeliaceae	Catopsis sessiliflora	EpiList (corrected)	Catopsis sessiliflora
1698	Bromeliaceae	Catopsis subulata	EpiList (corrected)	Catopsis subulata
1699	Bromeliaceae	Catopsis wangerinii	EpiList (corrected)	Catopsis wangerinii
1700	Bromeliaceae	Catopsis wawreana	EpiList (corrected)	Catopsis wawreana
1701	Bromeliaceae	Catopsis werckleana	EpiList (corrected)	Catopsis werckleana
1703	Bromeliaceae	Cipuropsis asmussii	EpiList (corrected)	Cipuropsis asmussii
1704	Bromeliaceae	Connellia caricifolia	EpiList (corrected)	Connellia caricifolia
1705	Bromeliaceae	Disteganthus basilateralis	EpiList (corrected)	Disteganthus basilateralis
1706	Bromeliaceae	Disteganthus calatheoides	EpiList (corrected)	Disteganthus calatheoides
1707	Bromeliaceae	Disteganthus gracieae	EpiList (corrected)	Disteganthus gracieae
1708	Bromeliaceae	Disteganthus lateralis	EpiList (corrected)	Disteganthus lateralis
1709	Bromeliaceae	Disteganthus morii	EpiList (corrected)	Disteganthus morii
1710	Bromeliaceae	Fascicularia bicolor	EpiList (corrected)	Fascicularia bicolor
1711	Bromeliaceae	Fernseea bocainensis	EpiList (corrected)	Fernseea bocainensis
3272	Bromeliaceae	Fosterella penduliflora	EpiList (corrected)	Wittmackia penduliflora
1712	Bromeliaceae	Glomeropitcairnia erectiflora	EpiList (corrected)	Glomeropitcairnia erectiflora
1713	Bromeliaceae	Glomeropitcairnia penduliflora	EpiList (corrected)	Glomeropitcairnia penduliflora
1714	Bromeliaceae	Greigia rohwederi	EpiList (corrected)	Greigia rohwederi
1715	Bromeliaceae	Guzmania acorifolia	EpiList (corrected)	Guzmania acorifolia
1716	Bromeliaceae	Guzmania acuminata	EpiList (corrected)	Guzmania acuminata
1717	Bromeliaceae	Guzmania acutispica	EpiList (corrected)	Guzmania acutispica
1718	Bromeliaceae	Guzmania adscendens	EpiList (corrected)	Guzmania adscendens
1719	Bromeliaceae	Guzmania aequatorialis	EpiList (corrected)	Guzmania aequatorialis
1720	Bromeliaceae	Guzmania albescens	EpiList (corrected)	Guzmania albescens
1721	Bromeliaceae	Guzmania alborosea	EpiList (corrected)	Guzmania alborosea
1722	Bromeliaceae	Guzmania alcantareoides	EpiList (corrected)	Guzmania alcantareoides
1723	Bromeliaceae	Guzmania alliodora	EpiList (corrected)	Guzmania alliodora
1724	Bromeliaceae	Guzmania altsonii	EpiList (corrected)	Guzmania altsonii
1725	Bromeliaceae	Guzmania amplectens	EpiList (corrected)	Guzmania amplectens
1726	Bromeliaceae	Guzmania andreana	EpiList (corrected)	Guzmania andreana
1727	Bromeliaceae	Guzmania andreettae	EpiList (corrected)	Guzmania andreettae
1728	Bromeliaceae	Guzmania angustifolia	EpiList (corrected)	Guzmania angustifolia
1729	Bromeliaceae	Guzmania apiculata	EpiList (corrected)	Guzmania apiculata
1730	Bromeliaceae	Guzmania armeniaca	EpiList (corrected)	Guzmania armeniaca
1731	Bromeliaceae	Guzmania asplundii	EpiList (corrected)	Guzmania asplundii
1732	Bromeliaceae	Guzmania atrocastanea	EpiList (corrected)	Guzmania atrocastanea
1733	Bromeliaceae	Guzmania attenuata	EpiList (corrected)	Guzmania attenuata
1734	Bromeliaceae	Guzmania bakeri	EpiList (corrected)	Guzmania bakeri
1735	Bromeliaceae	Guzmania barbiei	EpiList (corrected)	Guzmania barbiei
1736	Bromeliaceae	Guzmania bergae	EpiList (corrected)	Guzmania bergii
1737	Bromeliaceae	Guzmania berteroana	EpiList (corrected)	Guzmania berteroniana
1738	Bromeliaceae	Guzmania besseae	EpiList (corrected)	Guzmania besseae
1739	Bromeliaceae	Guzmania betancurii	EpiList (corrected)	Guzmania betancurii
1740	Bromeliaceae	Guzmania bicolor	EpiList (corrected)	Guzmania bicolor
1741	Bromeliaceae	Guzmania bipartita	EpiList (corrected)	Guzmania bipartita
1742	Bromeliaceae	Guzmania bismarckii	EpiList (corrected)	Guzmania bismarckii
1743	Bromeliaceae	Guzmania blassii	EpiList (corrected)	Guzmania blassii
1744	Bromeliaceae	Guzmania bracteosa	EpiList (corrected)	Guzmania bracteosa
1794	Bromeliaceae	Guzmania bracteosa	EpiList (corrected)	Guzmania fuscispica
1745	Bromeliaceae	Guzmania brasiliensis	EpiList (corrected)	Guzmania brasiliensis
1746	Bromeliaceae	Guzmania brevispatha	EpiList (corrected)	Guzmania brevispatha
1747	Bromeliaceae	Guzmania butcheri	EpiList (corrected)	Guzmania butcheri
1748	Bromeliaceae	Guzmania calamifolia	EpiList (corrected)	Guzmania calamifolia
1749	Bromeliaceae	Guzmania calothyrsa	EpiList (corrected)	Guzmania calothyrsus
1750	Bromeliaceae	Guzmania candelabrum	EpiList (corrected)	Guzmania candelabrum
1751	Bromeliaceae	Guzmania caricifolia	EpiList (corrected)	Guzmania caricifolia
1752	Bromeliaceae	Guzmania cinnabarina	EpiList (corrected)	Guzmania cinnabarina
1753	Bromeliaceae	Guzmania circinnata	EpiList (corrected)	Guzmania circinnata
1754	Bromeliaceae	Guzmania claviformis	EpiList (corrected)	Guzmania claviformis
1755	Bromeliaceae	Guzmania compacta	EpiList (corrected)	Guzmania compacta
1756	Bromeliaceae	Guzmania condensata	EpiList (corrected)	Guzmania condensata
1757	Bromeliaceae	Guzmania condorensis	EpiList (corrected)	Guzmania condorensis
1758	Bromeliaceae	Guzmania confinis	EpiList (corrected)	Guzmania confinis
1759	Bromeliaceae	Guzmania confusa	EpiList (corrected)	Guzmania confusa
1760	Bromeliaceae	Guzmania conglomerata	EpiList (corrected)	Guzmania conglomerata
1761	Bromeliaceae	Guzmania conifera	EpiList (corrected)	Guzmania conifera
1762	Bromeliaceae	Guzmania coriostachya	EpiList (corrected)	Guzmania coriostachya
1763	Bromeliaceae	Guzmania corniculata	EpiList (corrected)	Guzmania corniculata
1764	Bromeliaceae	Guzmania cuatrecasasii	EpiList (corrected)	Guzmania cuatrecasasii
1765	Bromeliaceae	Guzmania cuzcoensis	EpiList (corrected)	Guzmania cuzcoensis
1766	Bromeliaceae	Guzmania cylindrica	EpiList (corrected)	Guzmania cylindrica
1767	Bromeliaceae	Guzmania dalstroemii	EpiList (corrected)	Guzmania dalstroemii
1768	Bromeliaceae	Guzmania danielii	EpiList (corrected)	Guzmania danielii
1769	Bromeliaceae	Guzmania darienensis	EpiList (corrected)	Guzmania darienensis
1770	Bromeliaceae	Guzmania delicatula	EpiList (corrected)	Guzmania delicatula
1771	Bromeliaceae	Guzmania densiflora	EpiList (corrected)	Guzmania densiflora
1772	Bromeliaceae	Guzmania densispica	EpiList (corrected)	Guzmania densispica
1773	Bromeliaceae	Guzmania desautelsii	EpiList (corrected)	Guzmania desautelsii
1774	Bromeliaceae	Guzmania devansayana	EpiList (corrected)	Guzmania devansayana
1775	Bromeliaceae	Guzmania diffusa	EpiList (corrected)	Guzmania diffusa
1776	Bromeliaceae	Guzmania dissitiflora	EpiList (corrected)	Guzmania dissitiflora
1777	Bromeliaceae	Guzmania donnell-smithii	EpiList (corrected)	Guzmania donnellsmithii
1778	Bromeliaceae	Guzmania dudleyi	EpiList (corrected)	Guzmania dudleyi
1779	Bromeliaceae	Guzmania dussii	EpiList (corrected)	Guzmania dussii
1780	Bromeliaceae	Guzmania ecuadorensis	EpiList (corrected)	Guzmania ecuadorensis
1781	Bromeliaceae	Guzmania eduardi	EpiList (corrected)	Guzmania eduardi
1782	Bromeliaceae	Guzmania ekmanii	EpiList (corrected)	Guzmania ekmanii
1783	Bromeliaceae	Guzmania elvallensis	EpiList (corrected)	Guzmania elvallensis
1784	Bromeliaceae	Guzmania erythrolepis	EpiList (corrected)	Guzmania erythrolepis
1785	Bromeliaceae	Guzmania farciminiformis	EpiList (corrected)	Guzmania farciminiformis
1786	Bromeliaceae	Guzmania fawcettii	EpiList (corrected)	Guzmania fawcettii
1787	Bromeliaceae	Guzmania ferruginea	EpiList (corrected)	Guzmania ferruginea
1788	Bromeliaceae	Guzmania filiorum	EpiList (corrected)	Guzmania filiorum
1789	Bromeliaceae	Guzmania flagellata	EpiList (corrected)	Guzmania flagellata
1790	Bromeliaceae	Guzmania foetida	EpiList (corrected)	Guzmania foetida
1791	Bromeliaceae	Guzmania formosa	EpiList (corrected)	Guzmania formosa
1792	Bromeliaceae	Guzmania fosteriana	EpiList (corrected)	Guzmania fosteriana
1793	Bromeliaceae	Guzmania fuerstenbergiana	EpiList (corrected)	Guzmania fuerstenbergiana
1795	Bromeliaceae	Guzmania garciaensis	EpiList (corrected)	Guzmania garciaensis
1796	Bromeliaceae	Guzmania glaucophylla	EpiList (corrected)	Guzmania glaucophylla
1797	Bromeliaceae	Guzmania globosa	EpiList (corrected)	Guzmania globosa
1798	Bromeliaceae	Guzmania glomerata	EpiList (corrected)	Guzmania glomerata
1799	Bromeliaceae	Guzmania gloriosa	EpiList (corrected)	Guzmania gloriosa
1800	Bromeliaceae	Guzmania goudotiana	EpiList (corrected)	Guzmania goudotiana
1801	Bromeliaceae	Guzmania gracilis	EpiList (corrected)	Guzmania gracilis
1802	Bromeliaceae	Guzmania graminifolia	EpiList (corrected)	Guzmania graminifolia
1803	Bromeliaceae	Guzmania harlingii	EpiList (corrected)	Guzmania harlingii
1804	Bromeliaceae	Guzmania hedychioides	EpiList (corrected)	Guzmania hedychioides
1805	Bromeliaceae	Guzmania henniae	EpiList (corrected)	Guzmania henniae
1806	Bromeliaceae	Guzmania herrerae	EpiList (corrected)	Guzmania herrerae
1807	Bromeliaceae	Guzmania hirtzii	EpiList (corrected)	Guzmania hirtzii
1808	Bromeliaceae	Guzmania hitchcockiana	EpiList (corrected)	Guzmania hitchcockiana
1809	Bromeliaceae	Guzmania hollinensis	EpiList (corrected)	Guzmania hollinensis
1810	Bromeliaceae	Guzmania inexpectata	EpiList (corrected)	Guzmania inexpectata
1811	Bromeliaceae	Guzmania inkaterrae	EpiList (corrected)	Guzmania inkaterrae
1812	Bromeliaceae	Guzmania izkoi	EpiList (corrected)	Guzmania izkoi
1813	Bromeliaceae	Guzmania jaramilloi	EpiList (corrected)	Guzmania jaramilloi
1814	Bromeliaceae	Guzmania kalbreyeri	EpiList (corrected)	Guzmania kalbreyeri
1815	Bromeliaceae	Guzmania kareniae	EpiList (corrected)	Guzmania kareniae
1816	Bromeliaceae	Guzmania kennedyi	EpiList (corrected)	Guzmania kennedyae
1817	Bromeliaceae	Guzmania kentii	EpiList (corrected)	Guzmania kentii
1818	Bromeliaceae	Guzmania killipiana	EpiList (corrected)	Guzmania killipiana
1819	Bromeliaceae	Guzmania kraenzliniana	EpiList (corrected)	Guzmania kraenzliniana
1820	Bromeliaceae	Guzmania kressii	EpiList (corrected)	Guzmania kressii
1821	Bromeliaceae	Guzmania laeta	EpiList (corrected)	Guzmania laeta
1822	Bromeliaceae	Guzmania lehmanniana	EpiList (corrected)	Guzmania lehmanniana
1823	Bromeliaceae	Guzmania lemeana	EpiList (corrected)	Guzmania lemeana
1824	Bromeliaceae	Guzmania leonard-kentiana	EpiList (corrected)	Guzmania leonard-kentiana
1825	Bromeliaceae	Guzmania lepidota	EpiList (corrected)	Guzmania lepidota
1826	Bromeliaceae	Guzmania lindenii	EpiList (corrected)	Guzmania lindenii
1827	Bromeliaceae	Guzmania lingulata	EpiList (corrected)	Guzmania lingulata
1828	Bromeliaceae	Guzmania loeflingiana	EpiList (corrected)	Guzmania loeflingiana
1829	Bromeliaceae	Guzmania longibracteata	EpiList (corrected)	Guzmania longibracteata
1830	Bromeliaceae	Guzmania longipetala	EpiList (corrected)	Guzmania longipetala
1831	Bromeliaceae	Guzmania loraxiana	EpiList (corrected)	Guzmania loraxiana
1832	Bromeliaceae	Guzmania lychnis	EpiList (corrected)	Guzmania lychnis
1833	Bromeliaceae	Guzmania macropoda	EpiList (corrected)	Guzmania macropoda
1834	Bromeliaceae	Guzmania madisonii	EpiList (corrected)	Guzmania madisonii
1835	Bromeliaceae	Guzmania marantoidea	EpiList (corrected)	Guzmania marantoidea
1836	Bromeliaceae	Guzmania megastachya	EpiList (corrected)	Guzmania megastachya
1837	Bromeliaceae	Guzmania melinonis	EpiList (corrected)	Guzmania melinonis
1838	Bromeliaceae	Guzmania membranacea	EpiList (corrected)	Guzmania membranacea
29768	Bromeliaceae	Guzmania membranacea	EpiList (corrected)	Bosmania membranacea
1839	Bromeliaceae	Guzmania mitis	EpiList (corrected)	Guzmania mitis
1840	Bromeliaceae	Guzmania monostachia	EpiList (corrected)	Guzmania monostachia
1841	Bromeliaceae	Guzmania morreniana	EpiList (corrected)	Guzmania morreniana
1842	Bromeliaceae	Guzmania mosquerae	EpiList (corrected)	Guzmania mosquerae
1843	Bromeliaceae	Guzmania mucronata	EpiList (corrected)	Guzmania mucronata
1844	Bromeliaceae	Guzmania multiflora	EpiList (corrected)	Guzmania multiflora
1845	Bromeliaceae	Guzmania musaica	EpiList (corrected)	Guzmania musaica
1846	Bromeliaceae	Guzmania nangaritzae	EpiList (corrected)	Guzmania nangaritzae
1847	Bromeliaceae	Guzmania nicaraguensis	EpiList (corrected)	Guzmania nicaraguensis
1848	Bromeliaceae	Guzmania nubicola	EpiList (corrected)	Guzmania nubicola
1849	Bromeliaceae	Guzmania nubigena	EpiList (corrected)	Guzmania nubigena
1850	Bromeliaceae	Guzmania obtusiloba	EpiList (corrected)	Guzmania obtusiloba
1851	Bromeliaceae	Guzmania oligantha	EpiList (corrected)	Guzmania oligantha
1852	Bromeliaceae	Guzmania osyana	EpiList (corrected)	Guzmania osyana
1853	Bromeliaceae	Guzmania pallida	EpiList (corrected)	Guzmania pallida
1854	Bromeliaceae	Guzmania palustris	EpiList (corrected)	Guzmania palustris
1855	Bromeliaceae	Guzmania panamensis	EpiList (corrected)	Guzmania panamensis
1856	Bromeliaceae	Guzmania paniculata	EpiList (corrected)	Guzmania paniculata
1857	Bromeliaceae	Guzmania pattersoniae	EpiList (corrected)	Guzmania pattersoniae
1858	Bromeliaceae	Guzmania patula	EpiList (corrected)	Guzmania patula
1859	Bromeliaceae	Guzmania pearcei	EpiList (corrected)	Guzmania pearcei
1860	Bromeliaceae	Guzmania pennellii	EpiList (corrected)	Guzmania pennellii
1862	Bromeliaceae	Guzmania plicatifolia	EpiList (corrected)	Guzmania plicatifolia
1863	Bromeliaceae	Guzmania plumieri	EpiList (corrected)	Guzmania plumieri
1864	Bromeliaceae	Guzmania polycephala	EpiList (corrected)	Guzmania polycephala
1865	Bromeliaceae	Guzmania poortmanii	EpiList (corrected)	Guzmania poortmanii
1866	Bromeliaceae	Guzmania pseudodissitiflora	EpiList (corrected)	Guzmania pseudodissitiflora
1867	Bromeliaceae	Guzmania pseudospectabilis	EpiList (corrected)	Guzmania pseudospectabilis
1868	Bromeliaceae	Guzmania pungens	EpiList (corrected)	Guzmania pungens
1869	Bromeliaceae	Guzmania puyoensis	EpiList (corrected)	Guzmania puyoensis
1870	Bromeliaceae	Guzmania radiata	EpiList (corrected)	Guzmania radiata
1871	Bromeliaceae	Guzmania rauhiana	EpiList (corrected)	Guzmania rauhiana
1872	Bromeliaceae	Guzmania regalis	EpiList (corrected)	Guzmania regalis
1873	Bromeliaceae	Guzmania remyi	EpiList (corrected)	Guzmania remyi
1874	Bromeliaceae	Guzmania retusa	EpiList (corrected)	Guzmania retusa
1875	Bromeliaceae	Guzmania rhonhofiana	EpiList (corrected)	Guzmania rhonhofiana
1876	Bromeliaceae	Guzmania roezlii	EpiList (corrected)	Guzmania roezlii
1877	Bromeliaceae	Guzmania rosea	EpiList (corrected)	Guzmania rosea
1878	Bromeliaceae	Guzmania roseiflora	EpiList (corrected)	Guzmania roseiflora
1879	Bromeliaceae	Guzmania rubrolutea	EpiList (corrected)	Guzmania rubrolutea
1880	Bromeliaceae	Guzmania sanguinea	EpiList (corrected)	Guzmania sanguinea
1881	Bromeliaceae	Guzmania scandens	EpiList (corrected)	Guzmania scandens
1882	Bromeliaceae	Guzmania scherzeriana	EpiList (corrected)	Guzmania scherzeriana
1883	Bromeliaceae	Guzmania septata	EpiList (corrected)	Guzmania septata
1884	Bromeliaceae	Guzmania sibundoyorum	EpiList (corrected)	Guzmania sibundoyorum
1885	Bromeliaceae	Guzmania skotakii	EpiList (corrected)	Guzmania skotakii
1886	Bromeliaceae	Guzmania sneidernii	EpiList (corrected)	Guzmania sneidernii
1887	Bromeliaceae	Guzmania spectabilis	EpiList (corrected)	Guzmania spectabilis
1888	Bromeliaceae	Guzmania sprucei	EpiList (corrected)	Guzmania sprucei
1889	Bromeliaceae	Guzmania squarrosa	EpiList (corrected)	Guzmania squarrosa
1890	Bromeliaceae	Guzmania stenostachya	EpiList (corrected)	Guzmania stenostachya
1891	Bromeliaceae	Guzmania straminea	EpiList (corrected)	Guzmania straminea
1892	Bromeliaceae	Guzmania striata	EpiList (corrected)	Guzmania striata
1893	Bromeliaceae	Guzmania stricta	EpiList (corrected)	Guzmania stricta
1894	Bromeliaceae	Guzmania strobilantha	EpiList (corrected)	Guzmania strobilantha
1895	Bromeliaceae	Guzmania subcorymbosa	EpiList (corrected)	Guzmania subcorymbosa
1896	Bromeliaceae	Guzmania tarapotina	EpiList (corrected)	Guzmania tarapotina
1897	Bromeliaceae	Guzmania tenuifolia	EpiList (corrected)	Guzmania tenuifolia
1898	Bromeliaceae	Guzmania testudinis	EpiList (corrected)	Guzmania testudinis
1899	Bromeliaceae	Guzmania teucamae	EpiList (corrected)	Guzmania teucamae
1900	Bromeliaceae	Guzmania teuscheri	EpiList (corrected)	Guzmania teuscheri
1901	Bromeliaceae	Guzmania triangularis	EpiList (corrected)	Guzmania triangularis
1902	Bromeliaceae	Guzmania undulatobracteata	EpiList (corrected)	Guzmania undulatobracteata
1903	Bromeliaceae	Guzmania van-volxemii	EpiList (corrected)	Guzmania van-volxemii
1904	Bromeliaceae	Guzmania variegata	EpiList (corrected)	Guzmania variegata
1905	Bromeliaceae	Guzmania ventricosa	EpiList (corrected)	Guzmania ventricosa
1906	Bromeliaceae	Guzmania verecunda	EpiList (corrected)	Guzmania verecunda
1907	Bromeliaceae	Guzmania victoriae	EpiList (corrected)	Guzmania victoriae
1908	Bromeliaceae	Guzmania vinacea	EpiList (corrected)	Guzmania vinacea
1909	Bromeliaceae	Guzmania virescens	EpiList (corrected)	Guzmania virescens
1910	Bromeliaceae	Guzmania viridiflora	EpiList (corrected)	Guzmania viridiflora
1911	Bromeliaceae	Guzmania vittata	EpiList (corrected)	Guzmania vittata
1912	Bromeliaceae	Guzmania weberbaueri	EpiList (corrected)	Guzmania weberbaueri
1913	Bromeliaceae	Guzmania wittmackii	EpiList (corrected)	Guzmania wittmackii
1914	Bromeliaceae	Guzmania xanthobractea	EpiList (corrected)	Guzmania xanthobractea
1915	Bromeliaceae	Guzmania xipholepis	EpiList (corrected)	Guzmania xipholepis
1916	Bromeliaceae	Guzmania zahnii	EpiList (corrected)	Guzmania zahnii
1917	Bromeliaceae	Guzmania zakii	EpiList (corrected)	Guzmania zakii
1918	Bromeliaceae	Hohenbergia andina	EpiList (corrected)	Hohenbergia andina
1919	Bromeliaceae	Hohenbergia antillana	EpiList (corrected)	Hohenbergia antillana
1920	Bromeliaceae	Hohenbergia augusta	EpiList (corrected)	Hohenbergia augusta
1921	Bromeliaceae	Hohenbergia barbarespina	EpiList (corrected)	Hohenbergia barbarespina
1922	Bromeliaceae	Hohenbergia blanchetii	EpiList (corrected)	Hohenbergia blanchetii
1923	Bromeliaceae	Hohenbergia brittoniana	EpiList (corrected)	Hohenbergia brittoniana
1924	Bromeliaceae	Hohenbergia burle-marxii	EpiList (corrected)	Hohenbergia burle-marxii
1927	Bromeliaceae	Hohenbergia caatingae	EpiList (corrected)	Hohenbergia catingae
1925	Bromeliaceae	Hohenbergia capitata	EpiList (corrected)	Hohenbergia capitata
1926	Bromeliaceae	Hohenbergia castellanosii	EpiList (corrected)	Hohenbergia castellanosii
1928	Bromeliaceae	Hohenbergia caymanensis	EpiList (corrected)	Hohenbergia caymanensis
1929	Bromeliaceae	Hohenbergia conquistensis	EpiList (corrected)	Hohenbergia conquistensis
1930	Bromeliaceae	Hohenbergia correia-arauji	EpiList (corrected)	Hohenbergia correia-arauji
1931	Bromeliaceae	Hohenbergia distans	EpiList (corrected)	Hohenbergia distans
1932	Bromeliaceae	Hohenbergia eriantha	EpiList (corrected)	Hohenbergia eriantha
1933	Bromeliaceae	Hohenbergia eriostachya	EpiList (corrected)	Hohenbergia eriostachya
1934	Bromeliaceae	Hohenbergia fawcettii	EpiList (corrected)	Hohenbergia fawcettii
1935	Bromeliaceae	Hohenbergia flava	EpiList (corrected)	Hohenbergia flava
1936	Bromeliaceae	Hohenbergia gnetacea	EpiList (corrected)	Hohenbergia gnetacea
1937	Bromeliaceae	Hohenbergia humilis	EpiList (corrected)	Hohenbergia humilis
1938	Bromeliaceae	Hohenbergia inermis	EpiList (corrected)	Hohenbergia inermis
1939	Bromeliaceae	Hohenbergia isepponae	EpiList (corrected)	Hohenbergia isepponae
1940	Bromeliaceae	Hohenbergia jamaicana	EpiList (corrected)	Hohenbergia jamaicana
1941	Bromeliaceae	Hohenbergia laesslei	EpiList (corrected)	Hohenbergia laesslei
1942	Bromeliaceae	Hohenbergia lanata	EpiList (corrected)	Hohenbergia lanata
1943	Bromeliaceae	Hohenbergia lemei	EpiList (corrected)	Hohenbergia lemei
1944	Bromeliaceae	Hohenbergia littoralis	EpiList (corrected)	Hohenbergia littoralis
1945	Bromeliaceae	Hohenbergia loredanoana	EpiList (corrected)	Hohenbergia loredanoana
1946	Bromeliaceae	Hohenbergia membranostrobilus	EpiList (corrected)	Hohenbergia membranostrobilus
1947	Bromeliaceae	Hohenbergia mutabilis	EpiList (corrected)	Hohenbergia mutabilis
1948	Bromeliaceae	Hohenbergia negrilensis	EpiList (corrected)	Hohenbergia negrilensis
1949	Bromeliaceae	Hohenbergia pabstii	EpiList (corrected)	Hohenbergia pabstii
1950	Bromeliaceae	Hohenbergia penduliflora	EpiList (corrected)	Hohenbergia penduliflora
1951	Bromeliaceae	Hohenbergia polycephala	EpiList (corrected)	Hohenbergia polycephala
1952	Bromeliaceae	Hohenbergia portoricensis	EpiList (corrected)	Hohenbergia portoricensis
1953	Bromeliaceae	Hohenbergia proctorii	EpiList (corrected)	Hohenbergia proctorii
1954	Bromeliaceae	Hohenbergia ridleyi	EpiList (corrected)	Hohenbergia ridleyi
1955	Bromeliaceae	Hohenbergia rosea	EpiList (corrected)	Hohenbergia rosea
1956	Bromeliaceae	Hohenbergia salzmannii	EpiList (corrected)	Hohenbergia salzmannii
1957	Bromeliaceae	Hohenbergia spinulosa	EpiList (corrected)	Hohenbergia spinulosa
1958	Bromeliaceae	Hohenbergia stellata	EpiList (corrected)	Hohenbergia stellata
1959	Bromeliaceae	Hohenbergia undulatifolia	EpiList (corrected)	Hohenbergia undulatifolia
1960	Bromeliaceae	Hohenbergia urbaniana	EpiList (corrected)	Hohenbergia urbaniana
1961	Bromeliaceae	Hohenbergia vestita	EpiList (corrected)	Hohenbergia vestita
1962	Bromeliaceae	Hohenbergiopsis guatemalensis	EpiList (corrected)	Hohenbergiopsis guatemalensis
1963	Bromeliaceae	Lymania alvimii	EpiList (corrected)	Lymania alvimii
1964	Bromeliaceae	Lymania azurea	EpiList (corrected)	Lymania azurea
1965	Bromeliaceae	Lymania brachycaulis	EpiList (corrected)	Lymania brachycaulis
1966	Bromeliaceae	Lymania corallina	EpiList (corrected)	Lymania corallina
1967	Bromeliaceae	Lymania globosa	EpiList (corrected)	Lymania globosa
1968	Bromeliaceae	Lymania languida	EpiList (corrected)	Lymania languida
1969	Bromeliaceae	Lymania smithii	EpiList (corrected)	Lymania smithii
1970	Bromeliaceae	Lymania spiculata	EpiList (corrected)	Lymania spiculata
1971	Bromeliaceae	Mezobromelia bicolor	EpiList (corrected)	Mezobromelia bicolor
1972	Bromeliaceae	Mezobromelia brownii	EpiList (corrected)	Mezobromelia brownii
1973	Bromeliaceae	Mezobromelia capituligera	EpiList (corrected)	Mezobromelia capituligera
1974	Bromeliaceae	Mezobromelia fulgens	EpiList (corrected)	Mezobromelia fulgens
1975	Bromeliaceae	Mezobromelia hospitalis	EpiList (corrected)	Mezobromelia hospitalis
1976	Bromeliaceae	Mezobromelia hutchisonii	EpiList (corrected)	Mezobromelia hutchisonii
1977	Bromeliaceae	Mezobromelia lymansmithii	EpiList (corrected)	Mezobromelia lyman-smithii
1978	Bromeliaceae	Mezobromelia magdalenae	EpiList (corrected)	Mezobromelia magdalenae
1979	Bromeliaceae	Navia connata	EpiList (corrected)	Navia connata
1980	Bromeliaceae	Navia jauana	EpiList (corrected)	Navia jauana
1981	Bromeliaceae	Navia phelpsiae	EpiList (corrected)	Navia phelpsiae
1982	Bromeliaceae	Navia scirpiflora	EpiList (corrected)	Navia scirpiflora
1983	Bromeliaceae	Neoregelia abendrothae	EpiList (corrected)	Neoregelia abendrothae
1984	Bromeliaceae	Neoregelia alvimii	EpiList (corrected)	Neoregelia alvimii
1985	Bromeliaceae	Neoregelia amandae	EpiList (corrected)	Neoregelia amandae
1986	Bromeliaceae	Neoregelia ampullacea	EpiList (corrected)	Neoregelia ampullacea
1987	Bromeliaceae	Neoregelia angustibracteolata	EpiList (corrected)	Neoregelia angustibracteolata
1988	Bromeliaceae	Neoregelia angustifolia	EpiList (corrected)	Neoregelia angustifolia
1989	Bromeliaceae	Neoregelia atroviridifolia	EpiList (corrected)	Neoregelia atroviridifolia
1990	Bromeliaceae	Neoregelia azevedoi	EpiList (corrected)	Neoregelia azevedoi
1991	Bromeliaceae	Neoregelia binotii	EpiList (corrected)	Neoregelia binotii
1992	Bromeliaceae	Neoregelia bragarum	EpiList (corrected)	Neoregelia bragarum
1993	Bromeliaceae	Neoregelia brevifolia	EpiList (corrected)	Neoregelia brevifolia
1994	Bromeliaceae	Neoregelia brownii	EpiList (corrected)	Neoregelia brownii
1995	Bromeliaceae	Neoregelia burlemarxii	EpiList (corrected)	Neoregelia burlemarxii
1996	Bromeliaceae	Neoregelia camorimiana	EpiList (corrected)	Neoregelia camorimiana
1997	Bromeliaceae	Neoregelia capixaba	EpiList (corrected)	Neoregelia capixaba
1998	Bromeliaceae	Neoregelia carcharodon	EpiList (corrected)	Neoregelia carcharodon
1999	Bromeliaceae	Neoregelia carinata	EpiList (corrected)	Neoregelia carinata
2000	Bromeliaceae	Neoregelia carolinae	EpiList (corrected)	Neoregelia carolinae
2001	Bromeliaceae	Neoregelia cathcartii	EpiList (corrected)	Neoregelia cathcartii
2002	Bromeliaceae	Neoregelia chlorosticta	EpiList (corrected)	Neoregelia chlorosticta
2003	Bromeliaceae	Neoregelia coimbrae	EpiList (corrected)	Neoregelia coimbrae
2004	Bromeliaceae	Neoregelia compacta	EpiList (corrected)	Neoregelia compacta
2005	Bromeliaceae	Neoregelia concentrica	EpiList (corrected)	Neoregelia concentrica
2006	Bromeliaceae	Neoregelia coriacea	EpiList (corrected)	Neoregelia coriacea
2007	Bromeliaceae	Neoregelia correia-araujoi	EpiList (corrected)	Neoregelia correia-araujoi
2008	Bromeliaceae	Neoregelia crispata	EpiList (corrected)	Neoregelia crispata
2009	Bromeliaceae	Neoregelia cruenta	EpiList (corrected)	Neoregelia cruenta
2010	Bromeliaceae	Neoregelia cyanea	EpiList (corrected)	Neoregelia cyanea
2011	Bromeliaceae	Neoregelia dactyloflammans	EpiList (corrected)	Neoregelia dactyloflammans
2012	Bromeliaceae	Neoregelia dayvidiana	EpiList (corrected)	Neoregelia dayvidiana
2013	Bromeliaceae	Neoregelia doeringiana	EpiList (corrected)	Neoregelia doeringiana
2014	Bromeliaceae	Neoregelia dungsiana	EpiList (corrected)	Neoregelia dungsiana
2015	Bromeliaceae	Neoregelia eleutheropetala	EpiList (corrected)	Neoregelia eleutheropetala
2016	Bromeliaceae	Neoregelia eltoniana	EpiList (corrected)	Neoregelia eltoniana
2017	Bromeliaceae	Neoregelia farinosa	EpiList (corrected)	Neoregelia farinosa
2018	Bromeliaceae	Neoregelia fluminensis	EpiList (corrected)	Neoregelia fluminensis
2019	Bromeliaceae	Neoregelia fosteriana	EpiList (corrected)	Neoregelia fosteriana
2020	Bromeliaceae	Neoregelia gavionensis	EpiList (corrected)	Neoregelia gavionensis
2021	Bromeliaceae	Neoregelia gigas	EpiList (corrected)	Neoregelia gigas
2022	Bromeliaceae	Neoregelia guttata	EpiList (corrected)	Neoregelia guttata
2023	Bromeliaceae	Neoregelia hoehneana	EpiList (corrected)	Neoregelia hoehneana
2024	Bromeliaceae	Neoregelia ibitipocensis	EpiList (corrected)	Neoregelia ibitipocensis
2025	Bromeliaceae	Neoregelia ilhana	EpiList (corrected)	Neoregelia ilhana
2026	Bromeliaceae	Neoregelia indecora	EpiList (corrected)	Neoregelia indecora
2027	Bromeliaceae	Neoregelia inexspectata	EpiList (corrected)	Neoregelia inexspectata
2028	Bromeliaceae	Neoregelia johannis	EpiList (corrected)	Neoregelia johannis
2029	Bromeliaceae	Neoregelia johnsoniae	EpiList (corrected)	Neoregelia johnsoniae
2030	Bromeliaceae	Neoregelia kautskyi	EpiList (corrected)	Neoregelia kautskyi
2031	Bromeliaceae	Neoregelia kerryae	EpiList (corrected)	Neoregelia kerryae
2032	Bromeliaceae	Neoregelia kuhlmannii	EpiList (corrected)	Neoregelia kuhlmannii
2033	Bromeliaceae	Neoregelia lactea	EpiList (corrected)	Neoregelia lactea
2034	Bromeliaceae	Neoregelia laevis	EpiList (corrected)	Neoregelia laevis
2035	Bromeliaceae	Neoregelia leprosa	EpiList (corrected)	Neoregelia leprosa
2036	Bromeliaceae	Neoregelia leucophoea	EpiList (corrected)	Neoregelia leucophoea
2037	Bromeliaceae	Neoregelia leviana	EpiList (corrected)	Neoregelia leviana
2038	Bromeliaceae	Neoregelia lilliputiana	EpiList (corrected)	Neoregelia lilliputiana
2039	Bromeliaceae	Neoregelia lillyae	EpiList (corrected)	Neoregelia lillyae
2040	Bromeliaceae	Neoregelia longisepala	EpiList (corrected)	Neoregelia longisepala
2041	Bromeliaceae	Neoregelia lymaniana	EpiList (corrected)	Neoregelia lymaniana
2042	Bromeliaceae	Neoregelia macahensis	EpiList (corrected)	Neoregelia macahensis
2043	Bromeliaceae	Neoregelia macrosepala	EpiList (corrected)	Neoregelia macrosepala
2044	Bromeliaceae	Neoregelia maculata	EpiList (corrected)	Neoregelia maculata
2045	Bromeliaceae	Neoregelia magdalenae	EpiList (corrected)	Neoregelia magdalenae
2046	Bromeliaceae	Neoregelia margaretae	EpiList (corrected)	Neoregelia margaretae
2047	Bromeliaceae	Neoregelia marmorata	EpiList (corrected)	Neoregelia marmorata
2048	Bromeliaceae	Neoregelia martinellii	EpiList (corrected)	Neoregelia martinellii
2049	Bromeliaceae	Neoregelia mcwilliamsii	EpiList (corrected)	Neoregelia mcwilliamsii
2050	Bromeliaceae	Neoregelia melanodonta	EpiList (corrected)	Neoregelia melanodonta
2051	Bromeliaceae	Neoregelia mooreana	EpiList (corrected)	Neoregelia mooreana
2052	Bromeliaceae	Neoregelia myrmecophila	EpiList (corrected)	Neoregelia myrmecophila
2053	Bromeliaceae	Neoregelia nevaresii	EpiList (corrected)	Neoregelia nevaresii
2054	Bromeliaceae	Neoregelia nivea	EpiList (corrected)	Neoregelia nivea
2055	Bromeliaceae	Neoregelia odorata	EpiList (corrected)	Neoregelia odorata
2056	Bromeliaceae	Neoregelia olens	EpiList (corrected)	Neoregelia olens
2057	Bromeliaceae	Neoregelia oligantha	EpiList (corrected)	Neoregelia oligantha
2058	Bromeliaceae	Neoregelia paratiensis	EpiList (corrected)	Neoregelia paratiensis
2059	Bromeliaceae	Neoregelia pascoaliana	EpiList (corrected)	Neoregelia pascoaliana
2060	Bromeliaceae	Neoregelia pauciflora	EpiList (corrected)	Neoregelia pauciflora
2061	Bromeliaceae	Neoregelia paulistana	EpiList (corrected)	Neoregelia paulistana
2062	Bromeliaceae	Neoregelia pendula	EpiList (corrected)	Neoregelia pendula
2063	Bromeliaceae	Neoregelia pernambucana	EpiList (corrected)	Neoregelia pernambucana
2064	Bromeliaceae	Neoregelia petropolitana	EpiList (corrected)	Neoregelia petropolitana
2065	Bromeliaceae	Neoregelia pineliana	EpiList (corrected)	Neoregelia pineliana
2066	Bromeliaceae	Neoregelia pontualii	EpiList (corrected)	Neoregelia pontualii
2067	Bromeliaceae	Neoregelia princeps	EpiList (corrected)	Neoregelia princeps
2068	Bromeliaceae	Neoregelia punctatissima	EpiList (corrected)	Neoregelia punctatissima
2069	Bromeliaceae	Neoregelia retrorsa	EpiList (corrected)	Neoregelia retrorsa
2070	Bromeliaceae	Neoregelia richteri	EpiList (corrected)	Neoregelia richteri
2071	Bromeliaceae	Neoregelia roethii	EpiList (corrected)	Neoregelia roethii
2072	Bromeliaceae	Neoregelia rosea	EpiList (corrected)	Neoregelia rosea
2073	Bromeliaceae	Neoregelia rothinessa	EpiList (corrected)	Neoregelia rothinessa
2074	Bromeliaceae	Neoregelia rubrifolia	EpiList (corrected)	Neoregelia rubrifolia
2075	Bromeliaceae	Neoregelia rubrovittata	EpiList (corrected)	Neoregelia rubrovittata
2076	Bromeliaceae	Neoregelia ruschii	EpiList (corrected)	Neoregelia ruschii
2077	Bromeliaceae	Neoregelia sanguinea	EpiList (corrected)	Neoregelia sanguinea
2078	Bromeliaceae	Neoregelia sapiatibensis	EpiList (corrected)	Neoregelia sapiatibensis
2079	Bromeliaceae	Neoregelia sarmentosa	EpiList (corrected)	Neoregelia sarmentosa
2080	Bromeliaceae	Neoregelia schubertii	EpiList (corrected)	Neoregelia schubertii
2081	Bromeliaceae	Neoregelia seideliana	EpiList (corrected)	Neoregelia seideliana
2082	Bromeliaceae	Neoregelia silvimontana	EpiList (corrected)	Neoregelia silvimontana
2083	Bromeliaceae	Neoregelia simulans	EpiList (corrected)	Neoregelia simulans
2084	Bromeliaceae	Neoregelia smithii	EpiList (corrected)	Neoregelia smithii
2085	Bromeliaceae	Neoregelia spectabilis	EpiList (corrected)	Neoregelia spectabilis
2086	Bromeliaceae	Neoregelia spiralipetala	EpiList (corrected)	Neoregelia spiralipetala
2087	Bromeliaceae	Neoregelia stolonifera	EpiList (corrected)	Neoregelia stolonifera
2088	Bromeliaceae	Neoregelia tarapotoensis	EpiList (corrected)	Neoregelia tarapotoensis
2089	Bromeliaceae	Neoregelia tenebrosa	EpiList (corrected)	Neoregelia tenebrosa
2090	Bromeliaceae	Neoregelia tigrina	EpiList (corrected)	Neoregelia tigrina
2091	Bromeliaceae	Neoregelia tristis	EpiList (corrected)	Neoregelia tristis
2092	Bromeliaceae	Neoregelia uleana	EpiList (corrected)	Neoregelia uleana
2093	Bromeliaceae	Neoregelia viridolineata	EpiList (corrected)	Neoregelia viridolineata
2094	Bromeliaceae	Neoregelia viridovinosa	EpiList (corrected)	Neoregelia viridovinosa
2095	Bromeliaceae	Neoregelia watersiana	EpiList (corrected)	Neoregelia watersiana
2096	Bromeliaceae	Neoregelia wilsoniana	EpiList (corrected)	Neoregelia wilsoniana
2097	Bromeliaceae	Neoregelia wurdackii	EpiList (corrected)	Neoregelia wurdackii
2098	Bromeliaceae	Neoregelia zaslawskyi	EpiList (corrected)	Neoregelia zaslawskyi
2099	Bromeliaceae	Neoregelia zonata	EpiList (corrected)	Neoregelia zonata
2100	Bromeliaceae	Nidularium albiflorum	EpiList (corrected)	Nidularium albiflorum
2101	Bromeliaceae	Nidularium alegrense	EpiList (corrected)	Nidularium alegrense
2102	Bromeliaceae	Nidularium alvimii	EpiList (corrected)	Nidularium alvimii
2103	Bromeliaceae	Nidularium amazonicum	EpiList (corrected)	Nidularium amazonicum
2104	Bromeliaceae	Nidularium amorimii	EpiList (corrected)	Nidularium amorimii
2105	Bromeliaceae	Nidularium angustibracteatum	EpiList (corrected)	Nidularium angustibracteatum
2106	Bromeliaceae	Nidularium angustifolium	EpiList (corrected)	Nidularium angustifolium
2107	Bromeliaceae	Nidularium antoineanum	EpiList (corrected)	Nidularium antoineanum
2108	Bromeliaceae	Nidularium apiculatum	EpiList (corrected)	Nidularium apiculatum
2109	Bromeliaceae	Nidularium azureum	EpiList (corrected)	Nidularium azureum
2110	Bromeliaceae	Nidularium bicolor	EpiList (corrected)	Nidularium bicolor
2111	Bromeliaceae	Nidularium billbergioides	EpiList (corrected)	Nidularium billbergioides
2112	Bromeliaceae	Nidularium bocainense	EpiList (corrected)	Nidularium bocainensis
2113	Bromeliaceae	Nidularium burchellii	EpiList (corrected)	Nidularium burchellii
2114	Bromeliaceae	Nidularium campo-alegrensis	EpiList (corrected)	Nidularium campo-alegrensis
2115	Bromeliaceae	Nidularium campos-portoi	EpiList (corrected)	Nidularium campos-portoi
2116	Bromeliaceae	Nidularium cariacicaense	EpiList (corrected)	Nidularium cariacicaense
2117	Bromeliaceae	Nidularium catarinense	EpiList (corrected)	Nidularium catarinense
2118	Bromeliaceae	Nidularium corallinum	EpiList (corrected)	Nidularium corallinum
2119	Bromeliaceae	Nidularium correia-araujoi	EpiList (corrected)	Nidularium correia-araujoi
2120	Bromeliaceae	Nidularium exiguum	EpiList (corrected)	Nidularium exiguum
2121	Bromeliaceae	Nidularium ferdinando-coburgii	EpiList (corrected)	Nidularium ferdinando-coburgii
2122	Bromeliaceae	Nidularium ferrugineum	EpiList (corrected)	Nidularium ferrugineum
2123	Bromeliaceae	Nidularium fulgens	EpiList (corrected)	Nidularium fulgens
2124	Bromeliaceae	Nidularium innocentii	EpiList (corrected)	Nidularium innocentii
2125	Bromeliaceae	Nidularium itatiaiae	EpiList (corrected)	Nidularium itatiaiae
2126	Bromeliaceae	Nidularium kautskyanum	EpiList (corrected)	Nidularium kautskyanum
2127	Bromeliaceae	Nidularium lymanioides	EpiList (corrected)	Nidularium lymanioides
2128	Bromeliaceae	Nidularium mangaratibense	EpiList (corrected)	Nidularium mangaratibense
2129	Bromeliaceae	Nidularium marigoi	EpiList (corrected)	Nidularium marigoi
2130	Bromeliaceae	Nidularium microps	EpiList (corrected)	Nidularium microps
2131	Bromeliaceae	Nidularium organense	EpiList (corrected)	Nidularium organense
2132	Bromeliaceae	Nidularium picinguabensis	EpiList (corrected)	Nidularium picinguabensis
2133	Bromeliaceae	Nidularium procerum	EpiList (corrected)	Nidularium procerum
2134	Bromeliaceae	Nidularium pulcherrimum	EpiList (corrected)	Nidularium pulcherrimum
2135	Bromeliaceae	Nidularium purpureum	EpiList (corrected)	Nidularium purpureum
2136	Bromeliaceae	Nidularium rolfianum	EpiList (corrected)	Nidularium rolfianum
2137	Bromeliaceae	Nidularium rutilans	EpiList (corrected)	Nidularium rutilans
2138	Bromeliaceae	Nidularium scheremetiewii	EpiList (corrected)	Nidularium scheremetiewii
2139	Bromeliaceae	Nidularium seidelii	EpiList (corrected)	Nidularium seidelii
2140	Bromeliaceae	Nidularium utriculosum	EpiList (corrected)	Nidularium utriculosum
2141	Bromeliaceae	Nidularium viridipetalum	EpiList (corrected)	Nidularium viridipetalum
2142	Bromeliaceae	Orthophytum graomogolense	EpiList (corrected)	Orthophytum graomogolense
2143	Bromeliaceae	Orthophytum piranianum	EpiList (corrected)	Orthophytum piranianum
2144	Bromeliaceae	Orthophytum striatifolium	EpiList (corrected)	Orthophytum striatifolium
2145	Bromeliaceae	Pitcairnia alata	EpiList (corrected)	Pitcairnia alata
2146	Bromeliaceae	Pitcairnia altoatratoensis	EpiList (corrected)	Pitcairnia altoatratoensis
2147	Bromeliaceae	Pitcairnia andreetae	EpiList (corrected)	Pitcairnia andreetae
2148	Bromeliaceae	Pitcairnia arcuata	EpiList (corrected)	Pitcairnia arcuata
2149	Bromeliaceae	Pitcairnia atrorubens	EpiList (corrected)	Pitcairnia atrorubens
2150	Bromeliaceae	Pitcairnia bakeri	EpiList (corrected)	Pitcairnia bakeri
2151	Bromeliaceae	Pitcairnia brittoniana	EpiList (corrected)	Pitcairnia brittoniana
2152	Bromeliaceae	Pitcairnia brongniartiana	EpiList (corrected)	Pitcairnia brongniartiana
2153	Bromeliaceae	Pitcairnia brunnescens	EpiList (corrected)	Pitcairnia brunnescens
2154	Bromeliaceae	Pitcairnia caricifolia	EpiList (corrected)	Pitcairnia caricifolia
2155	Bromeliaceae	Pitcairnia carioana	EpiList (corrected)	Pitcairnia carioana
2156	Bromeliaceae	Pitcairnia clarkei	EpiList (corrected)	Pitcairnia clarkii
2157	Bromeliaceae	Pitcairnia commixta	EpiList (corrected)	Pitcairnia commixta
2158	Bromeliaceae	Pitcairnia cosangaensis	EpiList (corrected)	Pitcairnia cosangaensis
2159	Bromeliaceae	Pitcairnia diffusa	EpiList (corrected)	Pitcairnia diffusa
2160	Bromeliaceae	Pitcairnia elongata	EpiList (corrected)	Pitcairnia elongata
2161	Bromeliaceae	Pitcairnia epiphytica	EpiList (corrected)	Pitcairnia epiphytica
2162	Bromeliaceae	Pitcairnia foreroi	EpiList (corrected)	Pitcairnia foreroi
2163	Bromeliaceae	Pitcairnia fusca	EpiList (corrected)	Pitcairnia fusca
2164	Bromeliaceae	Pitcairnia heterophylla	EpiList (corrected)	Pitcairnia heterophylla
2165	Bromeliaceae	Pitcairnia hirtzii	EpiList (corrected)	Pitcairnia hirtzii
2166	Bromeliaceae	Pitcairnia imbricata	EpiList (corrected)	Pitcairnia imbricata
2167	Bromeliaceae	Pitcairnia lymansmithiana	EpiList (corrected)	Pitcairnia lymansmithiana
2168	Bromeliaceae	Pitcairnia macranthera	EpiList (corrected)	Pitcairnia macranthera
2169	Bromeliaceae	Pitcairnia mucida	EpiList (corrected)	Pitcairnia mucida
2170	Bromeliaceae	Pitcairnia multiflora	EpiList (corrected)	Pitcairnia multiflora
2171	Bromeliaceae	Pitcairnia nigra	EpiList (corrected)	Pitcairnia nigra
2172	Bromeliaceae	Pitcairnia palmeri	EpiList (corrected)	Pitcairnia palmeri
2173	Bromeliaceae	Pitcairnia palmoides	EpiList (corrected)	Pitcairnia palmoides
2174	Bromeliaceae	Pitcairnia prolifera	EpiList (corrected)	Pitcairnia prolifera
2175	Bromeliaceae	Pitcairnia ramosii	EpiList (corrected)	Pitcairnia ramosii
2176	Bromeliaceae	Pitcairnia rubiginosa	EpiList (corrected)	Pitcairnia rubiginosa
2177	Bromeliaceae	Pitcairnia semijuncta	EpiList (corrected)	Pitcairnia semijuncta
2178	Bromeliaceae	Pitcairnia sodiroi	EpiList (corrected)	Pitcairnia sodiroi
2179	Bromeliaceae	Pitcairnia spectabilis	EpiList (corrected)	Pitcairnia spectabilis
2180	Bromeliaceae	Pitcairnia squarrosa	EpiList (corrected)	Pitcairnia squarrosa
2181	Bromeliaceae	Pitcairnia stevensonii	EpiList (corrected)	Pitcairnia stevensonii
2182	Bromeliaceae	Pitcairnia trianae	EpiList (corrected)	Pitcairnia trianae
2183	Bromeliaceae	Pitcairnia uaupensis	EpiList (corrected)	Pitcairnia uaupensis
2184	Bromeliaceae	Pitcairnia wendlandii	EpiList (corrected)	Pitcairnia wendlandii
2185	Bromeliaceae	Portea alatisepala	EpiList (corrected)	Portea alatisepala
2186	Bromeliaceae	Portea grandiflora	EpiList (corrected)	Portea grandiflora
2187	Bromeliaceae	Quesnelia arvensis	EpiList (corrected)	Quesnelia arvensis
2188	Bromeliaceae	Quesnelia augusto-coburgii	EpiList (corrected)	Quesnelia augustocoburgi
2189	Bromeliaceae	Quesnelia augusto-coburgii	EpiList (corrected)	Quesnelia augusto-coburgii
2190	Bromeliaceae	Quesnelia blanda	EpiList (corrected)	Quesnelia blanda
2191	Bromeliaceae	Quesnelia clavata	EpiList (corrected)	Quesnelia clavata
2192	Bromeliaceae	Quesnelia conquistensis	EpiList (corrected)	Quesnelia conquistensis
2193	Bromeliaceae	Quesnelia dubia	EpiList (corrected)	Quesnelia dubia
2194	Bromeliaceae	Quesnelia edmundoi	EpiList (corrected)	Quesnelia edmundoi
2195	Bromeliaceae	Quesnelia humilis	EpiList (corrected)	Quesnelia humilis
2196	Bromeliaceae	Quesnelia imbricata	EpiList (corrected)	Quesnelia imbricata
2197	Bromeliaceae	Quesnelia kautskyi	EpiList (corrected)	Quesnelia kautskyi
2198	Bromeliaceae	Quesnelia koltesii	EpiList (corrected)	Quesnelia koltesii
2199	Bromeliaceae	Quesnelia lateralis	EpiList (corrected)	Quesnelia lateralis
2200	Bromeliaceae	Quesnelia liboniana	EpiList (corrected)	Quesnelia liboniana
2201	Bromeliaceae	Quesnelia marmorata	EpiList (corrected)	Quesnelia marmorata
2202	Bromeliaceae	Quesnelia quesneliana	EpiList (corrected)	Quesnelia quesneliana
2203	Bromeliaceae	Quesnelia testudo	EpiList (corrected)	Quesnelia testudo
2204	Bromeliaceae	Quesnelia tubifolia	EpiList (corrected)	Quesnelia tubifolia
2205	Bromeliaceae	Quesnelia violacea	EpiList (corrected)	Quesnelia violacea
2206	Bromeliaceae	Racinaea condorensis	EpiList (corrected)	Racinaea condorensis
2208	Bromeliaceae	Racinaea euryelytra	EpiList (corrected)	Racinaea euryelytra
2209	Bromeliaceae	Racinaea gentryana	EpiList (corrected)	Racinaea gentryana
2210	Bromeliaceae	Racinaea goudae	EpiList (corrected)	Racinaea goudae
2211	Bromeliaceae	Racinaea grantii	EpiList (corrected)	Racinaea grantii
2212	Bromeliaceae	Racinaea guacamayosensis	EpiList (corrected)	Racinaea guacamayosensis
2214	Bromeliaceae	Racinaea hasei	EpiList (corrected)	Racinaea hasei
2215	Bromeliaceae	Racinaea kalliantha	EpiList (corrected)	Racinaea kalliantha
2216	Bromeliaceae	Racinaea lutheri	EpiList (corrected)	Racinaea lutheri
2217	Bromeliaceae	Racinaea lymansmithiana	EpiList (corrected)	Racinaea lymansmithiana
2218	Bromeliaceae	Racinaea macrantha	EpiList (corrected)	Racinaea macrantha
2219	Bromeliaceae	Racinaea marioportillae	EpiList (corrected)	Racinaea marioportillae
2220	Bromeliaceae	Racinaea pattersoniae	EpiList (corrected)	Racinaea pattersoniae
2221	Bromeliaceae	Racinaea penduliflora	EpiList (corrected)	Racinaea penduliflora
2222	Bromeliaceae	Racinaea strobeliorum	EpiList (corrected)	Racinaea strobeliorum
2223	Bromeliaceae	Racinaea tillii	EpiList (corrected)	Racinaea tillii
2225	Bromeliaceae	Racinaea wuelfinghoffii	EpiList (corrected)	Racinaea wuelfinghoffii
2226	Bromeliaceae	Racinaea zingleri	EpiList (corrected)	Racinaea zingleri
1301	Bromeliaceae	Ronnbergia aciculosa	EpiList (corrected)	Aechmea aciculosa
2227	Bromeliaceae	Ronnbergia aciculosa	EpiList (corrected)	Ronnbergia aciculosa
1308	Bromeliaceae	Ronnbergia allenii	EpiList (corrected)	Aechmea allenii
2228	Bromeliaceae	Ronnbergia allenii	EpiList (corrected)	Ronnbergia allenii
2229	Bromeliaceae	Ronnbergia campanulata	EpiList (corrected)	Ronnbergia campanulata
2230	Bromeliaceae	Ronnbergia carvalhoi	EpiList (corrected)	Ronnbergia carvalhoi
2231	Bromeliaceae	Ronnbergia columbiana	EpiList (corrected)	Ronnbergia columbiana
2232	Bromeliaceae	Ronnbergia deleonii	EpiList (corrected)	Ronnbergia deleonii
1380	Bromeliaceae	Ronnbergia drakeana	EpiList (corrected)	Aechmea drakeana
2233	Bromeliaceae	Ronnbergia drakeana	EpiList (corrected)	Ronnbergia drakeana
2234	Bromeliaceae	Ronnbergia explodens	EpiList (corrected)	Ronnbergia explodens
1397	Bromeliaceae	Ronnbergia fraseri	EpiList (corrected)	Aechmea fraseri
2235	Bromeliaceae	Ronnbergia fraseri	EpiList (corrected)	Ronnbergia fraseri
1406	Bromeliaceae	Ronnbergia germinyana	EpiList (corrected)	Aechmea germinyana
2236	Bromeliaceae	Ronnbergia germinyana	EpiList (corrected)	Ronnbergia germinyana
2237	Bromeliaceae	Ronnbergia hathewayi	EpiList (corrected)	Ronnbergia hathewayi
1423	Bromeliaceae	Ronnbergia involucrata	EpiList (corrected)	Aechmea involucrata
2238	Bromeliaceae	Ronnbergia involucrata	EpiList (corrected)	Ronnbergia involucrata
2239	Bromeliaceae	Ronnbergia killipiana	EpiList (corrected)	Ronnbergia killipiana
2240	Bromeliaceae	Ronnbergia maidifolia	EpiList (corrected)	Ronnbergia maidifolia
2241	Bromeliaceae	Ronnbergia morreniana	EpiList (corrected)	Ronnbergia morreniana
2242	Bromeliaceae	Ronnbergia neoregelioides	EpiList (corrected)	Ronnbergia neoregelioides
2243	Bromeliaceae	Ronnbergia silvana	EpiList (corrected)	Ronnbergia silvana
1545	Bromeliaceae	Ronnbergia subpetiolata	EpiList (corrected)	Aechmea subpetiolata
2244	Bromeliaceae	Ronnbergia subpetiolata	EpiList (corrected)	Ronnbergia subpetiolata
1554	Bromeliaceae	Ronnbergia tonduzii	EpiList (corrected)	Aechmea tonduzii
2245	Bromeliaceae	Ronnbergia tonduzii	EpiList (corrected)	Ronnbergia tonduzii
1562	Bromeliaceae	Ronnbergia veitchii	EpiList (corrected)	Aechmea veitchii
2246	Bromeliaceae	Ronnbergia veitchii	EpiList (corrected)	Ronnbergia veitchii
1565	Bromeliaceae	Ronnbergia viridispica	EpiList (corrected)	Aechmea viridispica
2247	Bromeliaceae	Ronnbergia viridispica	EpiList (corrected)	Ronnbergia viridispica
1568	Bromeliaceae	Ronnbergia weberbaueri	EpiList (corrected)	Aechmea weberbaueri
2248	Bromeliaceae	Ronnbergia weberbaueri	EpiList (corrected)	Ronnbergia weberbaueri
1575	Bromeliaceae	Ronnbergia wuelfinghoffii	EpiList (corrected)	Aechmea wuelfinghoffii
2249	Bromeliaceae	Ronnbergia wuelfinghoffii	EpiList (corrected)	Ronnbergia wuelfinghoffii
2250	Bromeliaceae	Tillandsia abbreviata	EpiList (corrected)	Tillandsia abbreviata
2251	Bromeliaceae	Tillandsia abdita	EpiList (corrected)	Tillandsia abdita
2252	Bromeliaceae	Tillandsia achyrostachys	EpiList (corrected)	Tillandsia achyrostachys
2253	Bromeliaceae	Tillandsia acosta-solisii	EpiList (corrected)	Tillandsia acosta-solisii
2254	Bromeliaceae	Tillandsia acuminata	EpiList (corrected)	Tillandsia acuminata
2255	Bromeliaceae	Tillandsia adamsii	EpiList (corrected)	Tillandsia adamsii
2256	Bromeliaceae	Tillandsia adpressa	EpiList (corrected)	Tillandsia adpressa
2257	Bromeliaceae	Tillandsia adpressiflora	EpiList (corrected)	Tillandsia adpressiflora
2258	Bromeliaceae	Tillandsia aequatorialis	EpiList (corrected)	Tillandsia aequatorialis
2259	Bromeliaceae	Tillandsia aeranthos	EpiList (corrected)	Tillandsia aeranthos
2260	Bromeliaceae	Tillandsia aerisincola	EpiList (corrected)	Tillandsia aeris-incola
2262	Bromeliaceae	Tillandsia afonsoana	EpiList (corrected)	Tillandsia afonsoana
2263	Bromeliaceae	Tillandsia aguascalientensis	EpiList (corrected)	Tillandsia aguascalientensis
2264	Bromeliaceae	Tillandsia aizoides	EpiList (corrected)	Tillandsia aizoides
2265	Bromeliaceae	Tillandsia albertiana	EpiList (corrected)	Tillandsia albertiana
2266	Bromeliaceae	Tillandsia albida	EpiList (corrected)	Tillandsia albida
2267	Bromeliaceae	Tillandsia alfredo-lauii	EpiList (corrected)	Tillandsia alfredo-lauii
2268	Bromeliaceae	Tillandsia almeriae	EpiList (corrected)	Tillandsia almeriae
2269	Bromeliaceae	Tillandsia alvareziae	EpiList (corrected)	Tillandsia alvareziae
2271	Bromeliaceae	Tillandsia anceps	EpiList (corrected)	Tillandsia anceps
2272	Bromeliaceae	Tillandsia andicola	EpiList (corrected)	Tillandsia andicola
2273	Bromeliaceae	Tillandsia andreana	EpiList (corrected)	Tillandsia andreana
2274	Bromeliaceae	Tillandsia andrieuxii	EpiList (corrected)	Tillandsia andrieuxii
2275	Bromeliaceae	Tillandsia angulosa	EpiList (corrected)	Tillandsia angulosa
2276	Bromeliaceae	Tillandsia antillana	EpiList (corrected)	Tillandsia antillana
2277	Bromeliaceae	Tillandsia appenii	EpiList (corrected)	Tillandsia appenii
2278	Bromeliaceae	Tillandsia araujei	EpiList (corrected)	Tillandsia araujei
2279	Bromeliaceae	Tillandsia arenicola	EpiList (corrected)	Tillandsia arenicola
2280	Bromeliaceae	Tillandsia arequitae	EpiList (corrected)	Tillandsia arequitae
2281	Bromeliaceae	Tillandsia argentea	EpiList (corrected)	Tillandsia argentea
2282	Bromeliaceae	Tillandsia argentina	EpiList (corrected)	Tillandsia argentina
2283	Bromeliaceae	Tillandsia arizajuliae	EpiList (corrected)	Tillandsia ariza-juliae
2285	Bromeliaceae	Tillandsia atenangoensis	EpiList (corrected)	Tillandsia atenangoensis
2286	Bromeliaceae	Tillandsia atroviolacea	EpiList (corrected)	Tillandsia atroviolacea
2287	Bromeliaceae	Tillandsia atroviridipetala	EpiList (corrected)	Tillandsia atroviridipetala
2288	Bromeliaceae	Tillandsia aurea	EpiList (corrected)	Tillandsia aurea
2289	Bromeliaceae	Tillandsia australis	EpiList (corrected)	Tillandsia australis
2290	Bromeliaceae	Tillandsia bagua-grandensis	EpiList (corrected)	Tillandsia bagua-grandensis
2291	Bromeliaceae	Tillandsia baileyi	EpiList (corrected)	Tillandsia baileyi
2292	Bromeliaceae	Tillandsia bakeri	EpiList (corrected)	Tillandsia bakeri
2293	Bromeliaceae	Tillandsia bakiorum	EpiList (corrected)	Tillandsia bakiorum
2294	Bromeliaceae	Tillandsia balbisiana	EpiList (corrected)	Tillandsia balbisiana
2295	Bromeliaceae	Tillandsia baliophylla	EpiList (corrected)	Tillandsia baliophylla
2296	Bromeliaceae	Tillandsia balsasensis	EpiList (corrected)	Tillandsia balsasensis
2297	Bromeliaceae	Tillandsia bandensis	EpiList (corrected)	Tillandsia bandensis
2298	Bromeliaceae	Tillandsia barbeyana	EpiList (corrected)	Tillandsia barbeyana
2299	Bromeliaceae	Tillandsia barborkae	EpiList (corrected)	Tillandsia barborkae
2300	Bromeliaceae	Tillandsia barclayana	EpiList (corrected)	Tillandsia barclayana
2301	Bromeliaceae	Tillandsia barfussii	EpiList (corrected)	Tillandsia barfussii
2302	Bromeliaceae	Tillandsia barrosoae	EpiList (corrected)	Tillandsia barrosoae
2303	Bromeliaceae	Tillandsia barthlottii	EpiList (corrected)	Tillandsia barthlottii
2304	Bromeliaceae	Tillandsia bartramii	EpiList (corrected)	Tillandsia bartramii
2305	Bromeliaceae	Tillandsia bella	EpiList (corrected)	Tillandsia bella
2306	Bromeliaceae	Tillandsia belloensis	EpiList (corrected)	Tillandsia belloensis
2307	Bromeliaceae	Tillandsia bergeri	EpiList (corrected)	Tillandsia bergeri
2308	Bromeliaceae	Tillandsia bermejoensis	EpiList (corrected)	Tillandsia bermejoensis
2309	Bromeliaceae	Tillandsia biflora	EpiList (corrected)	Tillandsia biflora
2310	Bromeliaceae	Tillandsia bismarckii	EpiList (corrected)	Tillandsia bismarckii
2311	Bromeliaceae	Tillandsia blassii	EpiList (corrected)	Tillandsia blassii
2312	Bromeliaceae	Tillandsia bochilensis	EpiList (corrected)	Tillandsia bochilensis
2313	Bromeliaceae	Tillandsia boliviana	EpiList (corrected)	Tillandsia boliviana
2314	Bromeliaceae	Tillandsia bongarana	EpiList (corrected)	Tillandsia bongarana
2315	Bromeliaceae	Tillandsia boqueronensis	EpiList (corrected)	Tillandsia boqueronensis
2316	Bromeliaceae	Tillandsia borealis	EpiList (corrected)	Tillandsia borealis
2317	Bromeliaceae	Tillandsia borinquensis	EpiList (corrected)	Tillandsia borinquensis
2318	Bromeliaceae	Tillandsia botterii	EpiList (corrected)	Tillandsia botterii
2319	Bromeliaceae	Tillandsia bourgaei	EpiList (corrected)	Tillandsia bourgaei
2320	Bromeliaceae	Tillandsia brachycaulos	EpiList (corrected)	Tillandsia brachycaulos
2321	Bromeliaceae	Tillandsia brealitoensis	EpiList (corrected)	Tillandsia brealitoensis
2322	Bromeliaceae	Tillandsia brenneri	EpiList (corrected)	Tillandsia brenneri
2323	Bromeliaceae	Tillandsia brevicapsula	EpiList (corrected)	Tillandsia brevicapsula
2324	Bromeliaceae	Tillandsia brevilingua	EpiList (corrected)	Tillandsia brevilingua
2325	Bromeliaceae	Tillandsia brevior	EpiList (corrected)	Tillandsia brevior
2326	Bromeliaceae	Tillandsia breviturneri	EpiList (corrected)	Tillandsia breviturneri
2327	Bromeliaceae	Tillandsia bryoides	EpiList (corrected)	Tillandsia bryoides
2328	Bromeliaceae	Tillandsia buchlohii	EpiList (corrected)	Tillandsia buchlohii
2329	Bromeliaceae	Tillandsia bulbosa	EpiList (corrected)	Tillandsia bulbosa
2330	Bromeliaceae	Tillandsia buseri	EpiList (corrected)	Tillandsia buseri
2331	Bromeliaceae	Tillandsia butzii	EpiList (corrected)	Tillandsia butzii
2332	Bromeliaceae	Tillandsia caballosensis	EpiList (corrected)	Tillandsia caballosensis
2333	Bromeliaceae	Tillandsia cacticola	EpiList (corrected)	Tillandsia cacticola
2334	Bromeliaceae	Tillandsia caerulea	EpiList (corrected)	Tillandsia caerulea
2335	Bromeliaceae	Tillandsia cajamarcensis	EpiList (corrected)	Tillandsia cajamarcensis
2336	Bromeliaceae	Tillandsia califani	EpiList (corrected)	Tillandsia califani
2337	Bromeliaceae	Tillandsia caliginosa	EpiList (corrected)	Tillandsia caliginosa
2338	Bromeliaceae	Tillandsia callichroma	EpiList (corrected)	Tillandsia callichroma
2339	Bromeliaceae	Tillandsia calochlamys	EpiList (corrected)	Tillandsia calochlamys
2340	Bromeliaceae	Tillandsia calothyrsus	EpiList (corrected)	Tillandsia calothyrsus
2341	Bromeliaceae	Tillandsia caloura	EpiList (corrected)	Tillandsia caloura
2342	Bromeliaceae	Tillandsia camargoensis	EpiList (corrected)	Tillandsia camargoensis
2343	Bromeliaceae	Tillandsia candida	EpiList (corrected)	Tillandsia candida
2344	Bromeliaceae	Tillandsia canescens	EpiList (corrected)	Tillandsia canescens
2345	Bromeliaceae	Tillandsia capillaris	EpiList (corrected)	Tillandsia capillaris
2346	Bromeliaceae	Tillandsia capistranoensis	EpiList (corrected)	Tillandsia capistranoensis
2347	Bromeliaceae	Tillandsia capitata	EpiList (corrected)	Tillandsia capitata
2348	Bromeliaceae	Tillandsia caputmedusae	EpiList (corrected)	Tillandsia caput-medusae
2349	Bromeliaceae	Tillandsia cardenasii	EpiList (corrected)	Tillandsia cardenasii
2350	Bromeliaceae	Tillandsia carlos-hankii	EpiList (corrected)	Tillandsia carlos-hankii
2351	Bromeliaceae	Tillandsia carlsoniae	EpiList (corrected)	Tillandsia carlsoniae
2352	Bromeliaceae	Tillandsia carminea	EpiList (corrected)	Tillandsia carminea
2353	Bromeliaceae	Tillandsia carnosa	EpiList (corrected)	Tillandsia carnosa
2354	Bromeliaceae	Tillandsia carrierei	EpiList (corrected)	Tillandsia carrierei
2355	Bromeliaceae	Tillandsia carrilloi	EpiList (corrected)	Tillandsia carrilloi
2356	Bromeliaceae	Tillandsia castelensis	EpiList (corrected)	Tillandsia castelensis
2357	Bromeliaceae	Tillandsia castellanii	EpiList (corrected)	Tillandsia castellanii
2358	Bromeliaceae	Tillandsia catimbauensis	EpiList (corrected)	Tillandsia catimbauensis
2359	Bromeliaceae	Tillandsia caulescens	EpiList (corrected)	Tillandsia caulescens
2360	Bromeliaceae	Tillandsia cauliflora	EpiList (corrected)	Tillandsia cauliflora
2361	Bromeliaceae	Tillandsia cees-goudae	EpiList (corrected)	Tillandsia cees-goudae
2362	Bromeliaceae	Tillandsia celata	EpiList (corrected)	Tillandsia celata
2363	Bromeliaceae	Tillandsia cernua	EpiList (corrected)	Tillandsia cernua
2364	Bromeliaceae	Tillandsia cerrateana	EpiList (corrected)	Tillandsia cerrateana
2365	Bromeliaceae	Tillandsia chaetophylla	EpiList (corrected)	Tillandsia chaetophylla
2366	Bromeliaceae	Tillandsia chalcatzingensis	EpiList (corrected)	Tillandsia chalcatzingensis
2367	Bromeliaceae	Tillandsia chapalillaensis	EpiList (corrected)	Tillandsia chapalillaensis
2368	Bromeliaceae	Tillandsia chapeuensis	EpiList (corrected)	Tillandsia chapeuensis
2369	Bromeliaceae	Tillandsia chartacea	EpiList (corrected)	Tillandsia chartacea
2370	Bromeliaceae	Tillandsia chiapensis	EpiList (corrected)	Tillandsia chiapensis
2371	Bromeliaceae	Tillandsia chiletensis	EpiList (corrected)	Tillandsia chiletensis
2372	Bromeliaceae	Tillandsia chlorophylla	EpiList (corrected)	Tillandsia chlorophylla
2373	Bromeliaceae	Tillandsia chontalensis	EpiList (corrected)	Tillandsia chontalensis
2374	Bromeliaceae	Tillandsia chusgonensis	EpiList (corrected)	Tillandsia chusgonensis
2375	Bromeliaceae	Tillandsia circinnatioides	EpiList (corrected)	Tillandsia circinnatioides
2376	Bromeliaceae	Tillandsia clavigera	EpiList (corrected)	Tillandsia clavigera
2377	Bromeliaceae	Tillandsia coalcomanensis	EpiList (corrected)	Tillandsia coalcomanensis
2378	Bromeliaceae	Tillandsia coinaensis	EpiList (corrected)	Tillandsia coinaensis
2379	Bromeliaceae	Tillandsia colganii	EpiList (corrected)	Tillandsia colganii
2380	Bromeliaceae	Tillandsia colorata	EpiList (corrected)	Tillandsia colorata
2381	Bromeliaceae	Tillandsia comarapaensis	EpiList (corrected)	Tillandsia comarapaensis
2382	Bromeliaceae	Tillandsia comitanensis	EpiList (corrected)	Tillandsia comitanensis
2383	Bromeliaceae	Tillandsia commixa	EpiList (corrected)	Tillandsia commixa
2384	Bromeliaceae	Tillandsia compacta	EpiList (corrected)	Tillandsia compacta
2385	Bromeliaceae	Tillandsia complanata	EpiList (corrected)	Tillandsia complanata
2386	Bromeliaceae	Tillandsia compressa	EpiList (corrected)	Tillandsia compressa
2387	Bromeliaceae	Tillandsia concolor	EpiList (corrected)	Tillandsia concolor
2388	Bromeliaceae	Tillandsia confertiflora	EpiList (corrected)	Tillandsia confertiflora
2389	Bromeliaceae	Tillandsia confinis	EpiList (corrected)	Tillandsia confinis
2390	Bromeliaceae	Tillandsia contorta	EpiList (corrected)	Tillandsia contorta
2391	Bromeliaceae	Tillandsia copalaensis	EpiList (corrected)	Tillandsia copalaensis
2392	Bromeliaceae	Tillandsia copanensis	EpiList (corrected)	Tillandsia copanensis
2393	Bromeliaceae	Tillandsia copynii	EpiList (corrected)	Tillandsia copynii
2394	Bromeliaceae	Tillandsia cornuta	EpiList (corrected)	Tillandsia cornuta
2395	Bromeliaceae	Tillandsia cossonii	EpiList (corrected)	Tillandsia cossonii
2396	Bromeliaceae	Tillandsia cotagaitensis	EpiList (corrected)	Tillandsia cotagaitensis
2397	Bromeliaceae	Tillandsia crenulipetala	EpiList (corrected)	Tillandsia crenulipetala
2398	Bromeliaceae	Tillandsia crispa	EpiList (corrected)	Tillandsia crispa
2399	Bromeliaceae	Tillandsia crista-gallii	EpiList (corrected)	Tillandsia crista-gallii
2400	Bromeliaceae	Tillandsia cryptopoda	EpiList (corrected)	Tillandsia cryptopoda
2401	Bromeliaceae	Tillandsia cuatrecasasii	EpiList (corrected)	Tillandsia cuatrecasasii
2261	Bromeliaceae	Tillandsia cucaensis	EpiList (corrected)	Tillandsia aesii
2402	Bromeliaceae	Tillandsia cucullata	EpiList (corrected)	Tillandsia cucullata
2403	Bromeliaceae	Tillandsia curvifolia	EpiList (corrected)	Tillandsia curvifolia
2404	Bromeliaceae	Tillandsia cuspidata	EpiList (corrected)	Tillandsia cuspidata
2405	Bromeliaceae	Tillandsia cyanea	EpiList (corrected)	Tillandsia cyanea
3231	Bromeliaceae	Tillandsia cyanea	EpiList (corrected)	Wallisia cyanea
2406	Bromeliaceae	Tillandsia dasyliriifolia	EpiList (corrected)	Tillandsia dasyliriifolia
2407	Bromeliaceae	Tillandsia deflexa	EpiList (corrected)	Tillandsia deflexa
2408	Bromeliaceae	Tillandsia delicata	EpiList (corrected)	Tillandsia delicata
2409	Bromeliaceae	Tillandsia delicatula	EpiList (corrected)	Tillandsia delicatula
2410	Bromeliaceae	Tillandsia demissa	EpiList (corrected)	Tillandsia demissa
2411	Bromeliaceae	Tillandsia denudata	EpiList (corrected)	Tillandsia denudata
2412	Bromeliaceae	Tillandsia deppeana	EpiList (corrected)	Tillandsia deppeana
2413	Bromeliaceae	Tillandsia dexteri	EpiList (corrected)	Tillandsia dexteri
2414	Bromeliaceae	Tillandsia diaguitensis	EpiList (corrected)	Tillandsia diaguitensis
2415	Bromeliaceae	Tillandsia dichrophylla	EpiList (corrected)	Tillandsia dichrophylla
2416	Bromeliaceae	Tillandsia didisticha	EpiList (corrected)	Tillandsia didisticha
2417	Bromeliaceae	Tillandsia didistichoides	EpiList (corrected)	Tillandsia didistichoides
2418	Bromeliaceae	Tillandsia dielsii	EpiList (corrected)	Tillandsia dielsii
2419	Bromeliaceae	Tillandsia diffusa	EpiList (corrected)	Tillandsia diffusa
2420	Bromeliaceae	Tillandsia diguetii	EpiList (corrected)	Tillandsia diguetii
2421	Bromeliaceae	Tillandsia dodsonii	EpiList (corrected)	Tillandsia dodsonii
2422	Bromeliaceae	Tillandsia domingosmartinis	EpiList (corrected)	Tillandsia domingosmartinis
2423	Bromeliaceae	Tillandsia dorisdaltoniae	EpiList (corrected)	Tillandsia dorisdaltoniae
2424	Bromeliaceae	Tillandsia dorotheae	EpiList (corrected)	Tillandsia dorotheae
2425	Bromeliaceae	Tillandsia dorotheehaseae	EpiList (corrected)	Tillandsia dorotheehaseae
2426	Bromeliaceae	Tillandsia dugesii	EpiList (corrected)	Tillandsia dugesii
2427	Bromeliaceae	Tillandsia dura	EpiList (corrected)	Tillandsia dura
2428	Bromeliaceae	Tillandsia durangensis	EpiList (corrected)	Tillandsia durangensis
2429	Bromeliaceae	Tillandsia duratii	EpiList (corrected)	Tillandsia duratii
2207	Bromeliaceae	Tillandsia dyeriana	EpiList (corrected)	Racinaea dyeriana
2430	Bromeliaceae	Tillandsia dyeriana	EpiList (corrected)	Tillandsia dyeriana
2431	Bromeliaceae	Tillandsia ecarinata	EpiList (corrected)	Tillandsia ecarinata
2432	Bromeliaceae	Tillandsia eistetteri	EpiList (corrected)	Tillandsia eistetteri
2433	Bromeliaceae	Tillandsia eizii	EpiList (corrected)	Tillandsia eizii
2434	Bromeliaceae	Tillandsia elegans	EpiList (corrected)	Tillandsia elegans
2435	Bromeliaceae	Tillandsia elizabethae	EpiList (corrected)	Tillandsia elizabethae
2436	Bromeliaceae	Tillandsia elongata	EpiList (corrected)	Tillandsia elongata
2437	Bromeliaceae	Tillandsia eltoniana	EpiList (corrected)	Tillandsia eltoniana
2438	Bromeliaceae	Tillandsia elusiva	EpiList (corrected)	Tillandsia elusiva
2439	Bromeliaceae	Tillandsia elvirae-grossiae	EpiList (corrected)	Tillandsia elvirae-grossiae
2440	Bromeliaceae	Tillandsia emergens	EpiList (corrected)	Tillandsia emergens
2441	Bromeliaceae	Tillandsia engleriana	EpiList (corrected)	Tillandsia engleriana
2442	Bromeliaceae	Tillandsia erecta	EpiList (corrected)	Tillandsia erecta
2443	Bromeliaceae	Tillandsia erici	EpiList (corrected)	Tillandsia erici
2444	Bromeliaceae	Tillandsia ermitae	EpiList (corrected)	Tillandsia ermitae
2445	Bromeliaceae	Tillandsia erubescens	EpiList (corrected)	Tillandsia erubescens
2446	Bromeliaceae	Tillandsia escahuascensis	EpiList (corrected)	Tillandsia escahuascensis
2447	Bromeliaceae	Tillandsia espinosae	EpiList (corrected)	Tillandsia espinosae
2448	Bromeliaceae	Tillandsia esseriana	EpiList (corrected)	Tillandsia esseriana
2449	Bromeliaceae	Tillandsia excavata	EpiList (corrected)	Tillandsia excavata
2451	Bromeliaceae	Tillandsia exserta	EpiList (corrected)	Tillandsia exserta
2452	Bromeliaceae	Tillandsia fasciculata	EpiList (corrected)	Tillandsia fasciculata
2453	Bromeliaceae	Tillandsia fascifolia	EpiList (corrected)	Tillandsia fascifolia
2454	Bromeliaceae	Tillandsia fassettii	EpiList (corrected)	Tillandsia fassettii
2455	Bromeliaceae	Tillandsia fawcettii	EpiList (corrected)	Tillandsia fawcettii
2456	Bromeliaceae	Tillandsia fendleri	EpiList (corrected)	Tillandsia fendleri
2457	Bromeliaceae	Tillandsia ferreyrae	EpiList (corrected)	Tillandsia ferreyrae
2458	Bromeliaceae	Tillandsia ferrisiana	EpiList (corrected)	Tillandsia ferrisiana
2459	Bromeliaceae	Tillandsia festucoides	EpiList (corrected)	Tillandsia festucoides
2460	Bromeliaceae	Tillandsia filifolia	EpiList (corrected)	Tillandsia filifolia
2461	Bromeliaceae	Tillandsia flabellata	EpiList (corrected)	Tillandsia flabellata
2462	Bromeliaceae	Tillandsia flagellata	EpiList (corrected)	Tillandsia flagellata
2463	Bromeliaceae	Tillandsia flavobracteata	EpiList (corrected)	Tillandsia flavobracteata
2464	Bromeliaceae	Tillandsia flexuosa	EpiList (corrected)	Tillandsia flexuosa
2465	Bromeliaceae	Tillandsia floresensis	EpiList (corrected)	Tillandsia floresensis
2466	Bromeliaceae	Tillandsia floribunda	EpiList (corrected)	Tillandsia floribunda
2467	Bromeliaceae	Tillandsia foliosa	EpiList (corrected)	Tillandsia foliosa
2468	Bromeliaceae	Tillandsia fragrans	EpiList (corrected)	Tillandsia fragrans
2469	Bromeliaceae	Tillandsia franciscoi	EpiList (corrected)	Tillandsia franciscoi
2470	Bromeliaceae	Tillandsia frank-hasei	EpiList (corrected)	Tillandsia frank-hasei
2471	Bromeliaceae	Tillandsia fraseri	EpiList (corrected)	Tillandsia fraseri
2472	Bromeliaceae	Tillandsia fresnilloensis	EpiList (corrected)	Tillandsia fresnilloensis
2473	Bromeliaceae	Tillandsia fuchsii	EpiList (corrected)	Tillandsia fuchsii
2474	Bromeliaceae	Tillandsia funckeana	EpiList (corrected)	Tillandsia funckiana
2475	Bromeliaceae	Tillandsia funebris	EpiList (corrected)	Tillandsia funebris
2476	Bromeliaceae	Tillandsia fusiformis	EpiList (corrected)	Tillandsia fusiformis
2224	Bromeliaceae	Tillandsia gardneri	EpiList (corrected)	Racinaea venusta
2477	Bromeliaceae	Tillandsia gardneri	EpiList (corrected)	Tillandsia gardneri
2478	Bromeliaceae	Tillandsia geissei	EpiList (corrected)	Tillandsia geissei
2479	Bromeliaceae	Tillandsia geminiflora	EpiList (corrected)	Tillandsia geminiflora
2480	Bromeliaceae	Tillandsia genseri	EpiList (corrected)	Tillandsia genseri
2481	Bromeliaceae	Tillandsia ghiesbreghtii	EpiList (corrected)	Tillandsia ghiesbreghtii
2482	Bromeliaceae	Tillandsia gilliesii	EpiList (corrected)	Tillandsia gilliesii
2483	Bromeliaceae	Tillandsia gilmartiniae	EpiList (corrected)	Tillandsia gilmartiniae
2484	Bromeliaceae	Tillandsia glabrior	EpiList (corrected)	Tillandsia glabrior
2485	Bromeliaceae	Tillandsia glauca	EpiList (corrected)	Tillandsia glauca
2486	Bromeliaceae	Tillandsia globosa	EpiList (corrected)	Tillandsia globosa
2487	Bromeliaceae	Tillandsia glossophylla	EpiList (corrected)	Tillandsia glossophylla
2488	Bromeliaceae	Tillandsia gracillima	EpiList (corrected)	Tillandsia gracillima
2489	Bromeliaceae	Tillandsia graebeneri	EpiList (corrected)	Tillandsia graebeneri
2490	Bromeliaceae	Tillandsia grandis	EpiList (corrected)	Tillandsia grandis
2491	Bromeliaceae	Tillandsia grandispica	EpiList (corrected)	Tillandsia grandispica
2492	Bromeliaceae	Tillandsia grazielae	EpiList (corrected)	Tillandsia grazielae
2493	Bromeliaceae	Tillandsia grossispicata	EpiList (corrected)	Tillandsia grossispicata
2494	Bromeliaceae	Tillandsia gruberi	EpiList (corrected)	Tillandsia gruberi
2495	Bromeliaceae	Tillandsia guatemalensis	EpiList (corrected)	Tillandsia guatemalensis
2496	Bromeliaceae	Tillandsia guelzii	EpiList (corrected)	Tillandsia guelzii
2497	Bromeliaceae	Tillandsia guenther-nolleri	EpiList (corrected)	Tillandsia guenther-nolleri
2498	Bromeliaceae	Tillandsia guerreroensis	EpiList (corrected)	Tillandsia guerreroensis
2499	Bromeliaceae	Tillandsia gymnobotrya	EpiList (corrected)	Tillandsia gymnobotrya
2213	Bromeliaceae	Tillandsia hamaleana	EpiList (corrected)	Racinaea hamaleana
2500	Bromeliaceae	Tillandsia hamaleana	EpiList (corrected)	Tillandsia hamaleana
2501	Bromeliaceae	Tillandsia hammeri	EpiList (corrected)	Tillandsia hammeri
2502	Bromeliaceae	Tillandsia harrisii	EpiList (corrected)	Tillandsia harrisii
2503	Bromeliaceae	Tillandsia hasei	EpiList (corrected)	Tillandsia hasei
2504	Bromeliaceae	Tillandsia hauggiae	EpiList (corrected)	Tillandsia hauggiae
2505	Bromeliaceae	Tillandsia hegeri	EpiList (corrected)	Tillandsia hegeri
2506	Bromeliaceae	Tillandsia helmutii	EpiList (corrected)	Tillandsia helmutii
2507	Bromeliaceae	Tillandsia hemkeri	EpiList (corrected)	Tillandsia hemkeri
2508	Bromeliaceae	Tillandsia heterandra	EpiList (corrected)	Tillandsia heterandra
2509	Bromeliaceae	Tillandsia heteromorpha	EpiList (corrected)	Tillandsia heteromorpha
2510	Bromeliaceae	Tillandsia heterophylla	EpiList (corrected)	Tillandsia heterophylla
2511	Bromeliaceae	Tillandsia heubergeri	EpiList (corrected)	Tillandsia heubergeri
2512	Bromeliaceae	Tillandsia hintoniana	EpiList (corrected)	Tillandsia hintoniana
2513	Bromeliaceae	Tillandsia hirta	EpiList (corrected)	Tillandsia hirta
2514	Bromeliaceae	Tillandsia hirtzii	EpiList (corrected)	Tillandsia hirtzii
2515	Bromeliaceae	Tillandsia hoeijeri	EpiList (corrected)	Tillandsia hoeijeri
2516	Bromeliaceae	Tillandsia homostachya	EpiList (corrected)	Tillandsia homostachya
2517	Bromeliaceae	Tillandsia hondurensis	EpiList (corrected)	Tillandsia hondurensis
2518	Bromeliaceae	Tillandsia horstii	EpiList (corrected)	Tillandsia horstii
2519	Bromeliaceae	Tillandsia hotteana	EpiList (corrected)	Tillandsia hotteana
2520	Bromeliaceae	Tillandsia huajuapanensis	EpiList (corrected)	Tillandsia huajuapanensis
2521	Bromeliaceae	Tillandsia huamenulaensis	EpiList (corrected)	Tillandsia huamelulaensis
2522	Bromeliaceae	Tillandsia huarazensis	EpiList (corrected)	Tillandsia huarazensis
2523	Bromeliaceae	Tillandsia hubertiana	EpiList (corrected)	Tillandsia hubertiana
2524	Bromeliaceae	Tillandsia humilis	EpiList (corrected)	Tillandsia humilis
2525	Bromeliaceae	Tillandsia ignesiae	EpiList (corrected)	Tillandsia ignesiae
2526	Bromeliaceae	Tillandsia ilseana	EpiList (corrected)	Tillandsia ilseana
2527	Bromeliaceae	Tillandsia imperialis	EpiList (corrected)	Tillandsia imperialis
2528	Bromeliaceae	Tillandsia imporaensis	EpiList (corrected)	Tillandsia imporaensis
2529	Bromeliaceae	Tillandsia incarnata	EpiList (corrected)	Tillandsia incarnata
2530	Bromeliaceae	Tillandsia inconspicua	EpiList (corrected)	Tillandsia inconspicua
2531	Bromeliaceae	Tillandsia indigofera	EpiList (corrected)	Tillandsia indigofera
2532	Bromeliaceae	Tillandsia inopinata	EpiList (corrected)	Tillandsia inopinata
2534	Bromeliaceae	Tillandsia insularis	EpiList (corrected)	Tillandsia insularis
2535	Bromeliaceae	Tillandsia intermedia	EpiList (corrected)	Tillandsia intermedia
2536	Bromeliaceae	Tillandsia interrupta	EpiList (corrected)	Tillandsia interrupta
2537	Bromeliaceae	Tillandsia intumescens	EpiList (corrected)	Tillandsia intumescens
2538	Bromeliaceae	Tillandsia ionantha	EpiList (corrected)	Tillandsia ionantha
2539	Bromeliaceae	Tillandsia ionochroma	EpiList (corrected)	Tillandsia ionochroma
2540	Bromeliaceae	Tillandsia itaubensis	EpiList (corrected)	Tillandsia itaubensis
2541	Bromeliaceae	Tillandsia ixioides	EpiList (corrected)	Tillandsia ixioides
2542	Bromeliaceae	Tillandsia izabalensis	EpiList (corrected)	Tillandsia izabalensis
2543	Bromeliaceae	Tillandsia jaguactalensis	EpiList (corrected)	Tillandsia jaguactalensis
2544	Bromeliaceae	Tillandsia jaliscopinicola	EpiList (corrected)	Tillandsia jaliscopinicola
2545	Bromeliaceae	Tillandsia jarmilae	EpiList (corrected)	Tillandsia jarmilae
2546	Bromeliaceae	Tillandsia jenmanii	EpiList (corrected)	Tillandsia jenmanii
2547	Bromeliaceae	Tillandsia jucunda	EpiList (corrected)	Tillandsia jucunda
2548	Bromeliaceae	Tillandsia juerg-rutschmannii	EpiList (corrected)	Tillandsia juerg-rutschmannii
2549	Bromeliaceae	Tillandsia juncea	EpiList (corrected)	Tillandsia juncea
2550	Bromeliaceae	Tillandsia kalmbacheri	EpiList (corrected)	Tillandsia kalmbacheri
2551	Bromeliaceae	Tillandsia kammii	EpiList (corrected)	Tillandsia kammii
2552	Bromeliaceae	Tillandsia karwinskyana	EpiList (corrected)	Tillandsia karwinskyana
2553	Bromeliaceae	Tillandsia kauffmannii	EpiList (corrected)	Tillandsia kauffmannii
2554	Bromeliaceae	Tillandsia kautskyi	EpiList (corrected)	Tillandsia kautskyi
2555	Bromeliaceae	Tillandsia kegeliana	EpiList (corrected)	Tillandsia kegeliana
2556	Bromeliaceae	Tillandsia kessleri	EpiList (corrected)	Tillandsia kessleri
2557	Bromeliaceae	Tillandsia kirchhoffiana	EpiList (corrected)	Tillandsia kirchhoffiana
2558	Bromeliaceae	Tillandsia kirschnekii	EpiList (corrected)	Tillandsia kirschnekii
2559	Bromeliaceae	Tillandsia klausii	EpiList (corrected)	Tillandsia klausii
2560	Bromeliaceae	Tillandsia koehresiana	EpiList (corrected)	Tillandsia koehresiana
2561	Bromeliaceae	Tillandsia koideae	EpiList (corrected)	Tillandsia koideae
2562	Bromeliaceae	Tillandsia kolbii	EpiList (corrected)	Tillandsia kolbii
2563	Bromeliaceae	Tillandsia kretzii	EpiList (corrected)	Tillandsia kretzii
2564	Bromeliaceae	Tillandsia krukoffiana	EpiList (corrected)	Tillandsia krukoffiana
2565	Bromeliaceae	Tillandsia krystofii	EpiList (corrected)	Tillandsia krystofii
2566	Bromeliaceae	Tillandsia kuehhasii	EpiList (corrected)	Tillandsia kuehhasii
2567	Bromeliaceae	Tillandsia kuntzeana	EpiList (corrected)	Tillandsia kuntzeana
2568	Bromeliaceae	Tillandsia kuzmae	EpiList (corrected)	Tillandsia kuzmae
2569	Bromeliaceae	Tillandsia lajensis	EpiList (corrected)	Tillandsia lajensis
2570	Bromeliaceae	Tillandsia laminata	EpiList (corrected)	Tillandsia laminata
2571	Bromeliaceae	Tillandsia lampropoda	EpiList (corrected)	Tillandsia lampropoda
2572	Bromeliaceae	Tillandsia landbeckii	EpiList (corrected)	Tillandsia landbeckii
2573	Bromeliaceae	Tillandsia langlasseana	EpiList (corrected)	Tillandsia langlasseana
2574	Bromeliaceae	Tillandsia latifolia	EpiList (corrected)	Tillandsia latifolia
2575	Bromeliaceae	Tillandsia laui	EpiList (corrected)	Tillandsia laui
2576	Bromeliaceae	Tillandsia lautneri	EpiList (corrected)	Tillandsia lautneri
2577	Bromeliaceae	Tillandsia laxissima	EpiList (corrected)	Tillandsia laxissima
2578	Bromeliaceae	Tillandsia leiboldiana	EpiList (corrected)	Tillandsia leiboldiana
2579	Bromeliaceae	Tillandsia leonamiana	EpiList (corrected)	Tillandsia leonamiana
2580	Bromeliaceae	Tillandsia lepidosepala	EpiList (corrected)	Tillandsia lepidosepala
2581	Bromeliaceae	Tillandsia lescaillei	EpiList (corrected)	Tillandsia lescaillei
2582	Bromeliaceae	Tillandsia leucolepis	EpiList (corrected)	Tillandsia leucolepis
2583	Bromeliaceae	Tillandsia leucopetala	EpiList (corrected)	Tillandsia leucopetala
2584	Bromeliaceae	Tillandsia limae	EpiList (corrected)	Tillandsia limae
2585	Bromeliaceae	Tillandsia limarum	EpiList (corrected)	Tillandsia limarum
2586	Bromeliaceae	Tillandsia limbata	EpiList (corrected)	Tillandsia limbata
2587	Bromeliaceae	Tillandsia lindenii	EpiList (corrected)	Tillandsia lindenii
2588	Bromeliaceae	Tillandsia linearis	EpiList (corrected)	Tillandsia linearis
2589	Bromeliaceae	Tillandsia lineatispica_x	EpiList (corrected)	Tillandsia lineatispica
2590	Bromeliaceae	Tillandsia lithophila	EpiList (corrected)	Tillandsia lithophila
2591	Bromeliaceae	Tillandsia loliacea	EpiList (corrected)	Tillandsia loliacea
2592	Bromeliaceae	Tillandsia loma-blancae	EpiList (corrected)	Tillandsia loma-blancae
2593	Bromeliaceae	Tillandsia longifolia	EpiList (corrected)	Tillandsia longifolia
2594	Bromeliaceae	Tillandsia lorentziana	EpiList (corrected)	Tillandsia lorentziana
2595	Bromeliaceae	Tillandsia lotteae	EpiList (corrected)	Tillandsia lotteae
2596	Bromeliaceae	Tillandsia loxichaensis	EpiList (corrected)	Tillandsia loxichaensis
2597	Bromeliaceae	Tillandsia lucida	EpiList (corrected)	Tillandsia lucida
2598	Bromeliaceae	Tillandsia lutheri	EpiList (corrected)	Tillandsia lutheri
2599	Bromeliaceae	Tillandsia lydiae_x	EpiList (corrected)	Tillandsia lydiae
2600	Bromeliaceae	Tillandsia lymanii	EpiList (corrected)	Tillandsia lymanii
2601	Bromeliaceae	Tillandsia macbrideana	EpiList (corrected)	Tillandsia macbrideana
2602	Bromeliaceae	Tillandsia macdougallii	EpiList (corrected)	Tillandsia macdougallii
2603	Bromeliaceae	Tillandsia machupicchuensis	EpiList (corrected)	Tillandsia machupicchuensis
2604	Bromeliaceae	Tillandsia macrochlamys	EpiList (corrected)	Tillandsia macrochlamys
2605	Bromeliaceae	Tillandsia macrodactylon	EpiList (corrected)	Tillandsia macrodactylon
2606	Bromeliaceae	Tillandsia maculata	EpiList (corrected)	Tillandsia maculata
2607	Bromeliaceae	Tillandsia macvaughii	EpiList (corrected)	Tillandsia macvaughii
2608	Bromeliaceae	Tillandsia magnispica	EpiList (corrected)	Tillandsia magnispica
2609	Bromeliaceae	Tillandsia magnusiana	EpiList (corrected)	Tillandsia magnusiana
2610	Bromeliaceae	Tillandsia makoyana	EpiList (corrected)	Tillandsia makoyana
2611	Bromeliaceae	Tillandsia makrinii	EpiList (corrected)	Tillandsia makrinii
2612	Bromeliaceae	Tillandsia mallemontii	EpiList (corrected)	Tillandsia mallemontii
2613	Bromeliaceae	Tillandsia malyi	EpiList (corrected)	Tillandsia malyi
3073	Bromeliaceae	Tillandsia malzinei	EpiList (corrected)	Vriesea malzinei
2614	Bromeliaceae	Tillandsia marabascoensis	EpiList (corrected)	Tillandsia marabascoensis
2615	Bromeliaceae	Tillandsia marcalaensis	EpiList (corrected)	Tillandsia marcalaensis
2616	Bromeliaceae	Tillandsia marconae	EpiList (corrected)	Tillandsia marconae
2617	Bromeliaceae	Tillandsia maritima	EpiList (corrected)	Tillandsia maritima
2618	Bromeliaceae	Tillandsia marnieri-apostollei	EpiList (corrected)	Tillandsia marnieri-apostollei
2619	Bromeliaceae	Tillandsia mateoensis	EpiList (corrected)	Tillandsia mateoensis
2620	Bromeliaceae	Tillandsia matudae	EpiList (corrected)	Tillandsia matudae
2621	Bromeliaceae	Tillandsia mauryana	EpiList (corrected)	Tillandsia mauryana
2622	Bromeliaceae	Tillandsia maya	EpiList (corrected)	Tillandsia maya
2623	Bromeliaceae	Tillandsia maypatii	EpiList (corrected)	Tillandsia may-patii
2624	Bromeliaceae	Tillandsia mazatlanensis	EpiList (corrected)	Tillandsia mazatlanensis
2625	Bromeliaceae	Tillandsia membranacifolia	EpiList (corrected)	Tillandsia membranacifolia
2626	Bromeliaceae	Tillandsia mereliana	EpiList (corrected)	Tillandsia mereliana
2627	Bromeliaceae	Tillandsia mezii	EpiList (corrected)	Tillandsia mezii
2628	Bromeliaceae	Tillandsia micans	EpiList (corrected)	Tillandsia micans
2629	Bromeliaceae	Tillandsia michelii	EpiList (corrected)	Tillandsia michelii
2630	Bromeliaceae	Tillandsia milagrensis	EpiList (corrected)	Tillandsia milagrensis
2631	Bromeliaceae	Tillandsia mima	EpiList (corrected)	Tillandsia mima
2632	Bromeliaceae	Tillandsia minutiflora	EpiList (corrected)	Tillandsia minutiflora
2633	Bromeliaceae	Tillandsia mirabilis	EpiList (corrected)	Tillandsia mirabilis
2634	Bromeliaceae	Tillandsia mitlaensis	EpiList (corrected)	Tillandsia mitlaensis
2635	Bromeliaceae	Tillandsia mixtecorum	EpiList (corrected)	Tillandsia mixtecorum
2636	Bromeliaceae	Tillandsia mollis	EpiList (corrected)	Tillandsia mollis
2637	Bromeliaceae	Tillandsia monadelpha	EpiList (corrected)	Tillandsia monadelpha
2638	Bromeliaceae	Tillandsia montana	EpiList (corrected)	Tillandsia montana
2639	Bromeliaceae	Tillandsia monticola	EpiList (corrected)	Tillandsia monticola
2640	Bromeliaceae	Tillandsia mooreana	EpiList (corrected)	Tillandsia mooreana
2641	Bromeliaceae	Tillandsia moronesensis	EpiList (corrected)	Tillandsia moronesensis
2642	Bromeliaceae	Tillandsia moscosoi	EpiList (corrected)	Tillandsia moscosoi
2643	Bromeliaceae	Tillandsia muhrae	EpiList (corrected)	Tillandsia muhriae
2644	Bromeliaceae	Tillandsia multicaulis	EpiList (corrected)	Tillandsia multicaulis
2645	Bromeliaceae	Tillandsia multiflora	EpiList (corrected)	Tillandsia multiflora
2646	Bromeliaceae	Tillandsia myosura	EpiList (corrected)	Tillandsia myosura
2647	Bromeliaceae	Tillandsia myriantha	EpiList (corrected)	Tillandsia myriantha
2648	Bromeliaceae	Tillandsia nana	EpiList (corrected)	Tillandsia nana
2649	Bromeliaceae	Tillandsia narthecioides	EpiList (corrected)	Tillandsia narthecioides
2650	Bromeliaceae	Tillandsia neglecta	EpiList (corrected)	Tillandsia neglecta
2651	Bromeliaceae	Tillandsia nervata	EpiList (corrected)	Tillandsia nervata
2652	Bromeliaceae	Tillandsia nervibractea	EpiList (corrected)	Tillandsia nervibractea
2653	Bromeliaceae	Tillandsia nervisepala	EpiList (corrected)	Tillandsia nervisepala
2654	Bromeliaceae	Tillandsia nicolasensis	EpiList (corrected)	Tillandsia nicolasensis
2655	Bromeliaceae	Tillandsia nidus_x	EpiList (corrected)	Tillandsia nidus
2656	Bromeliaceae	Tillandsia nolleriana	EpiList (corrected)	Tillandsia nolleriana
2657	Bromeliaceae	Tillandsia novakii	EpiList (corrected)	Tillandsia novakii
2658	Bromeliaceae	Tillandsia nuptialis	EpiList (corrected)	Tillandsia nuptialis
2659	Bromeliaceae	Tillandsia nuyooensis	EpiList (corrected)	Tillandsia nuyooensis
2660	Bromeliaceae	Tillandsia oaxacana	EpiList (corrected)	Tillandsia oaxacana
2661	Bromeliaceae	Tillandsia oblivata	EpiList (corrected)	Tillandsia oblivata
2662	Bromeliaceae	Tillandsia occulta	EpiList (corrected)	Tillandsia occulta
2663	Bromeliaceae	Tillandsia oerstediana	EpiList (corrected)	Tillandsia oerstediana
2664	Bromeliaceae	Tillandsia orbicularis	EpiList (corrected)	Tillandsia orbicularis
2665	Bromeliaceae	Tillandsia organensis	EpiList (corrected)	Tillandsia organensis
2666	Bromeliaceae	Tillandsia orogenes	EpiList (corrected)	Tillandsia orogenes
2667	Bromeliaceae	Tillandsia oropezana	EpiList (corrected)	Tillandsia oropezana
2668	Bromeliaceae	Tillandsia oroyensis	EpiList (corrected)	Tillandsia oroyensis
2669	Bromeliaceae	Tillandsia ortgiesiana	EpiList (corrected)	Tillandsia ortgiesiana
2670	Bromeliaceae	Tillandsia oxapampae	EpiList (corrected)	Tillandsia oxapampae
2671	Bromeliaceae	Tillandsia pachyaxon	EpiList (corrected)	Tillandsia pachyaxon
2672	Bromeliaceae	Tillandsia pacifica	EpiList (corrected)	Tillandsia pacifica
2673	Bromeliaceae	Tillandsia pallescens	EpiList (corrected)	Tillandsia pallescens
2674	Bromeliaceae	Tillandsia pallidoflavens	EpiList (corrected)	Tillandsia pallidoflavens
2675	Bromeliaceae	Tillandsia pamelae	EpiList (corrected)	Tillandsia pamelae
2676	Bromeliaceae	Tillandsia pampasensis	EpiList (corrected)	Tillandsia pampasensis
2677	Bromeliaceae	Tillandsia paniculata	EpiList (corrected)	Tillandsia paniculata
2678	Bromeliaceae	Tillandsia paraensis	EpiList (corrected)	Tillandsia paraensis
2679	Bromeliaceae	Tillandsia paraisoensis	EpiList (corrected)	Tillandsia paraisoensis
2680	Bromeliaceae	Tillandsia pardina	EpiList (corrected)	Tillandsia pardina
2681	Bromeliaceae	Tillandsia pardoi	EpiList (corrected)	Tillandsia pardoi
2682	Bromeliaceae	Tillandsia parryi	EpiList (corrected)	Tillandsia parryi
2683	Bromeliaceae	Tillandsia parviflora	EpiList (corrected)	Tillandsia parviflora
2684	Bromeliaceae	Tillandsia parvispica	EpiList (corrected)	Tillandsia parvispica
2685	Bromeliaceae	Tillandsia pastensis	EpiList (corrected)	Tillandsia pastensis
2686	Bromeliaceae	Tillandsia paucifolia	EpiList (corrected)	Tillandsia paucifolia
2687	Bromeliaceae	Tillandsia pectinata	EpiList (corrected)	Tillandsia pectinata
2688	Bromeliaceae	Tillandsia peiranoi	EpiList (corrected)	Tillandsia peiranoi
2689	Bromeliaceae	Tillandsia pendulispica	EpiList (corrected)	Tillandsia pendulispica
2690	Bromeliaceae	Tillandsia penlandii	EpiList (corrected)	Tillandsia penlandii
2691	Bromeliaceae	Tillandsia pentasticha	EpiList (corrected)	Tillandsia pentasticha
2692	Bromeliaceae	Tillandsia pfeufferi	EpiList (corrected)	Tillandsia pfeufferi
2693	Bromeliaceae	Tillandsia pfisteri	EpiList (corrected)	Tillandsia pfisteri
2694	Bromeliaceae	Tillandsia piauiensis	EpiList (corrected)	Tillandsia piauiensis
2695	Bromeliaceae	Tillandsia piepenbringii	EpiList (corrected)	Tillandsia piepenbringii
2696	Bromeliaceae	Tillandsia pinicola	EpiList (corrected)	Tillandsia pinicola
2697	Bromeliaceae	Tillandsia pinnata	EpiList (corrected)	Tillandsia pinnata
2698	Bromeliaceae	Tillandsia pinnatodigitata	EpiList (corrected)	Tillandsia pinnatodigitata
2699	Bromeliaceae	Tillandsia plagiotropica	EpiList (corrected)	Tillandsia plagiotropica
2700	Bromeliaceae	Tillandsia platyrhachis	EpiList (corrected)	Tillandsia platyrhachis
2701	Bromeliaceae	Tillandsia plumosa	EpiList (corrected)	Tillandsia plumosa
2702	Bromeliaceae	Tillandsia pohliana	EpiList (corrected)	Tillandsia pohliana
2703	Bromeliaceae	Tillandsia polita	EpiList (corrected)	Tillandsia polita
2704	Bromeliaceae	Tillandsia polyantha	EpiList (corrected)	Tillandsia polyantha
2705	Bromeliaceae	Tillandsia polystachya	EpiList (corrected)	Tillandsia polystachia
2706	Bromeliaceae	Tillandsia polzii	EpiList (corrected)	Tillandsia polzii
2707	Bromeliaceae	Tillandsia pomacochae	EpiList (corrected)	Tillandsia pomacochae
2708	Bromeliaceae	Tillandsia ponderosa	EpiList (corrected)	Tillandsia ponderosa
2709	Bromeliaceae	Tillandsia porongoensis	EpiList (corrected)	Tillandsia porongoensis
2710	Bromeliaceae	Tillandsia portillae	EpiList (corrected)	Tillandsia portillae
2711	Bromeliaceae	Tillandsia praschekii	EpiList (corrected)	Tillandsia praschekii
2712	Bromeliaceae	Tillandsia pretiosa	EpiList (corrected)	Tillandsia pretiosa
3232	Bromeliaceae	Tillandsia pretiosa	EpiList (corrected)	Wallisia pretiosa
2713	Bromeliaceae	Tillandsia prodigiosa	EpiList (corrected)	Tillandsia prodigiosa
2714	Bromeliaceae	Tillandsia prolata	EpiList (corrected)	Tillandsia prolata
2715	Bromeliaceae	Tillandsia propagulifera	EpiList (corrected)	Tillandsia propagulifera
2716	Bromeliaceae	Tillandsia pruinosa	EpiList (corrected)	Tillandsia pruinosa
2717	Bromeliaceae	Tillandsia pseudobaileyi	EpiList (corrected)	Tillandsia pseudobaileyi
2718	Bromeliaceae	Tillandsia pseudocardenasii	EpiList (corrected)	Tillandsia pseudocardenasii
2719	Bromeliaceae	Tillandsia pseudomacbrideana	EpiList (corrected)	Tillandsia pseudomacbrideana
2720	Bromeliaceae	Tillandsia pseudomicans	EpiList (corrected)	Tillandsia pseudomicans
2721	Bromeliaceae	Tillandsia pseudomontana	EpiList (corrected)	Tillandsia pseudomontana
2722	Bromeliaceae	Tillandsia pseudooaxacana	EpiList (corrected)	Tillandsia pseudooaxacana
2723	Bromeliaceae	Tillandsia pseudosetacea	EpiList (corrected)	Tillandsia pseudosetacea
2724	Bromeliaceae	Tillandsia pseudotetrantha	EpiList (corrected)	Tillandsia pseudotetrantha
2725	Bromeliaceae	Tillandsia pucaraensis	EpiList (corrected)	Tillandsia pucaraensis
2726	Bromeliaceae	Tillandsia pueblensis	EpiList (corrected)	Tillandsia pueblensis
2727	Bromeliaceae	Tillandsia pugiformis	EpiList (corrected)	Tillandsia pugiformis
2728	Bromeliaceae	Tillandsia punctulata	EpiList (corrected)	Tillandsia punctulata
2729	Bromeliaceae	Tillandsia purpurascens	EpiList (corrected)	Tillandsia purpurascens
2730	Bromeliaceae	Tillandsia pyramidata	EpiList (corrected)	Tillandsia pyramidata
2731	Bromeliaceae	Tillandsia quadripinnata	EpiList (corrected)	Tillandsia quadripinnata
2732	Bromeliaceae	Tillandsia quaquaflorifera	EpiList (corrected)	Tillandsia quaquaflorifera
2733	Bromeliaceae	Tillandsia queretaroensis	EpiList (corrected)	Tillandsia queretaroensis
2734	Bromeliaceae	Tillandsia queroensis	EpiList (corrected)	Tillandsia queroensis
2735	Bromeliaceae	Tillandsia raackii	EpiList (corrected)	Tillandsia raackii
2736	Bromeliaceae	Tillandsia racinae	EpiList (corrected)	Tillandsia racinae
2737	Bromeliaceae	Tillandsia ramellae	EpiList (corrected)	Tillandsia ramellae
2738	Bromeliaceae	Tillandsia rangelensis	EpiList (corrected)	Tillandsia rangelensis
2739	Bromeliaceae	Tillandsia rariflora	EpiList (corrected)	Tillandsia rariflora
2740	Bromeliaceae	Tillandsia rauschii	EpiList (corrected)	Tillandsia rauschii
2741	Bromeliaceae	Tillandsia rectangula	EpiList (corrected)	Tillandsia rectangula
2742	Bromeliaceae	Tillandsia recurvata	EpiList (corrected)	Tillandsia recurvata
2743	Bromeliaceae	Tillandsia recurvifolia	EpiList (corrected)	Tillandsia recurvifolia
2744	Bromeliaceae	Tillandsia reichenbachii	EpiList (corrected)	Tillandsia reichenbachii
2745	Bromeliaceae	Tillandsia remota	EpiList (corrected)	Tillandsia remota
2746	Bromeliaceae	Tillandsia restrepoana	EpiList (corrected)	Tillandsia restrepoana
2747	Bromeliaceae	Tillandsia retorta	EpiList (corrected)	Tillandsia retorta
2748	Bromeliaceae	Tillandsia rettigiana	EpiList (corrected)	Tillandsia rettigiana
2749	Bromeliaceae	Tillandsia reuteri	EpiList (corrected)	Tillandsia reuteri
2750	Bromeliaceae	Tillandsia reversa	EpiList (corrected)	Tillandsia reversa
2751	Bromeliaceae	Tillandsia rhodocephala	EpiList (corrected)	Tillandsia rhodocepahala
2752	Bromeliaceae	Tillandsia rhodosticta	EpiList (corrected)	Tillandsia rhodosticta
2753	Bromeliaceae	Tillandsia rhomboidea	EpiList (corrected)	Tillandsia rhomboidea
2754	Bromeliaceae	Tillandsia riocreuxii	EpiList (corrected)	Tillandsia riocreuxii
2755	Bromeliaceae	Tillandsia riohondoensis	EpiList (corrected)	Tillandsia riohondoensis
2756	Bromeliaceae	Tillandsia rodrigueziana	EpiList (corrected)	Tillandsia rodrigueziana
2757	Bromeliaceae	Tillandsia roezlii	EpiList (corrected)	Tillandsia roezlii
2758	Bromeliaceae	Tillandsia rohdenardinii	EpiList (corrected)	Tillandsia rohdenardinii
2759	Bromeliaceae	Tillandsia roland-gosselinii	EpiList (corrected)	Tillandsia roland-gosselinii
2760	Bromeliaceae	Tillandsia romeroi	EpiList (corrected)	Tillandsia romeroi
2761	Bromeliaceae	Tillandsia ropalocarpa	EpiList (corrected)	Tillandsia ropalocarpa
2762	Bromeliaceae	Tillandsia rosacea	EpiList (corrected)	Tillandsia rosacea
2763	Bromeliaceae	Tillandsia rosarioae	EpiList (corrected)	Tillandsia rosarioae
2764	Bromeliaceae	Tillandsia roseiflora	EpiList (corrected)	Tillandsia roseiflora
2765	Bromeliaceae	Tillandsia roseoscapa	EpiList (corrected)	Tillandsia roseoscapa
2766	Bromeliaceae	Tillandsia roseospicata	EpiList (corrected)	Tillandsia roseospicata
2767	Bromeliaceae	Tillandsia rothii	EpiList (corrected)	Tillandsia rothii
2768	Bromeliaceae	Tillandsia rothschuhiana	EpiList (corrected)	Tillandsia rothschuhiana
2769	Bromeliaceae	Tillandsia rotundata	EpiList (corrected)	Tillandsia rotundata
2770	Bromeliaceae	Tillandsia rubella	EpiList (corrected)	Tillandsia rubella
2771	Bromeliaceae	Tillandsia rubia	EpiList (corrected)	Tillandsia rubia
2772	Bromeliaceae	Tillandsia rubrispica	EpiList (corrected)	Tillandsia rubrispica
2773	Bromeliaceae	Tillandsia rubroviolacea	EpiList (corrected)	Tillandsia rubroviolacea
2774	Bromeliaceae	Tillandsia rudolfii	EpiList (corrected)	Tillandsia rudolfii
2775	Bromeliaceae	Tillandsia rusbyi	EpiList (corrected)	Tillandsia rusbyi
2776	Bromeliaceae	Tillandsia sagasteguii	EpiList (corrected)	Tillandsia sagasteguii
2777	Bromeliaceae	Tillandsia salmonea	EpiList (corrected)	Tillandsia salmonea
2778	Bromeliaceae	Tillandsia samaipatensis	EpiList (corrected)	Tillandsia samaipatensis
2779	Bromeliaceae	Tillandsia sanctae-martae	EpiList (corrected)	Tillandsia sanctae-martae
2780	Bromeliaceae	Tillandsia sangii	EpiList (corrected)	Tillandsia sangii
2781	Bromeliaceae	Tillandsia santieusebii	EpiList (corrected)	Tillandsia santieusebii
2782	Bromeliaceae	Tillandsia santosiae	EpiList (corrected)	Tillandsia santosiae
2783	Bromeliaceae	Tillandsia scaligera	EpiList (corrected)	Tillandsia scaligera
2784	Bromeliaceae	Tillandsia sceptriformis	EpiList (corrected)	Tillandsia sceptriformis
2785	Bromeliaceae	Tillandsia schatzlii	EpiList (corrected)	Tillandsia schatzlii
2786	Bromeliaceae	Tillandsia schiedeana	EpiList (corrected)	Tillandsia schiedeana
2788	Bromeliaceae	Tillandsia schultzei	EpiList (corrected)	Tillandsia schultzei
2789	Bromeliaceae	Tillandsia schumanniana	EpiList (corrected)	Tillandsia schumanniana
2790	Bromeliaceae	Tillandsia schunkei	EpiList (corrected)	Tillandsia schunkei
2791	Bromeliaceae	Tillandsia schusteri	EpiList (corrected)	Tillandsia schusteri
2792	Bromeliaceae	Tillandsia secunda	EpiList (corrected)	Tillandsia secunda
2793	Bromeliaceae	Tillandsia seemannii	EpiList (corrected)	Tillandsia seemannii
2794	Bromeliaceae	Tillandsia seideliana	EpiList (corrected)	Tillandsia seideliana
2795	Bromeliaceae	Tillandsia seleriana	EpiList (corrected)	Tillandsia seleriana
2796	Bromeliaceae	Tillandsia selleana	EpiList (corrected)	Tillandsia selleana
2797	Bromeliaceae	Tillandsia sessemocinoi	EpiList (corrected)	Tillandsia sessemocinoi
2798	Bromeliaceae	Tillandsia setacea	EpiList (corrected)	Tillandsia setacea
2799	Bromeliaceae	Tillandsia setiformis	EpiList (corrected)	Tillandsia setiformis
2800	Bromeliaceae	Tillandsia sierrahalensis	EpiList (corrected)	Tillandsia sierrahalensis
2801	Bromeliaceae	Tillandsia sierrajuarezensis	EpiList (corrected)	Tillandsia sierrajuarezensis
2802	Bromeliaceae	Tillandsia sigmoidea	EpiList (corrected)	Tillandsia sigmoidea
2803	Bromeliaceae	Tillandsia simulata	EpiList (corrected)	Tillandsia simulata
2805	Bromeliaceae	Tillandsia sinuosa	EpiList (corrected)	Tillandsia sinuosa
2806	Bromeliaceae	Tillandsia socialis	EpiList (corrected)	Tillandsia socialis
2807	Bromeliaceae	Tillandsia sodiroi	EpiList (corrected)	Tillandsia sodiroi
2808	Bromeliaceae	Tillandsia somnians	EpiList (corrected)	Tillandsia somnians
2809	Bromeliaceae	Tillandsia spathacea	EpiList (corrected)	Tillandsia spathacea
2810	Bromeliaceae	Tillandsia sphaerocephala	EpiList (corrected)	Tillandsia sphaerocephala
2811	Bromeliaceae	Tillandsia spiculosa	EpiList (corrected)	Tillandsia spiculosa
2812	Bromeliaceae	Tillandsia spiraliflora	EpiList (corrected)	Tillandsia spiraliflora
2813	Bromeliaceae	Tillandsia spiralipetala	EpiList (corrected)	Tillandsia spiralipetala
2814	Bromeliaceae	Tillandsia sprengeliana	EpiList (corrected)	Tillandsia sprengeliana
2815	Bromeliaceae	Tillandsia standleyi	EpiList (corrected)	Tillandsia standleyi
2816	Bromeliaceae	Tillandsia steiropoda	EpiList (corrected)	Tillandsia steiropoda
2817	Bromeliaceae	Tillandsia stellifera	EpiList (corrected)	Tillandsia stellifera
2818	Bromeliaceae	Tillandsia stenoura	EpiList (corrected)	Tillandsia stenoura
2819	Bromeliaceae	Tillandsia steyermarkii	EpiList (corrected)	Tillandsia steyermarkii
2820	Bromeliaceae	Tillandsia stipitata	EpiList (corrected)	Tillandsia stipitata
2821	Bromeliaceae	Tillandsia straminea	EpiList (corrected)	Tillandsia straminea
2822	Bromeliaceae	Tillandsia streptocarpa	EpiList (corrected)	Tillandsia streptocarpa
2823	Bromeliaceae	Tillandsia streptophylla	EpiList (corrected)	Tillandsia streptophylla
2824	Bromeliaceae	Tillandsia stricta	EpiList (corrected)	Tillandsia stricta
2825	Bromeliaceae	Tillandsia subalata	EpiList (corrected)	Tillandsia subalata
2826	Bromeliaceae	Tillandsia subconcolor	EpiList (corrected)	Tillandsia subconcolor
2827	Bromeliaceae	Tillandsia subinflata	EpiList (corrected)	Tillandsia subinflata
2828	Bromeliaceae	Tillandsia subteres	EpiList (corrected)	Tillandsia subteres
2829	Bromeliaceae	Tillandsia subulifera	EpiList (corrected)	Tillandsia subulifera
2830	Bromeliaceae	Tillandsia sueae	EpiList (corrected)	Tillandsia sueae
2831	Bromeliaceae	Tillandsia suescana	EpiList (corrected)	Tillandsia suescana
2832	Bromeliaceae	Tillandsia suesilliae	EpiList (corrected)	Tillandsia suesilliae
2833	Bromeliaceae	Tillandsia superba	EpiList (corrected)	Tillandsia superba
2834	Bromeliaceae	Tillandsia superinsignis	EpiList (corrected)	Tillandsia superinsignis
2835	Bromeliaceae	Tillandsia supermexicana	EpiList (corrected)	Tillandsia supermexicana
2836	Bromeliaceae	Tillandsia tafiensis	EpiList (corrected)	Tillandsia tafiensis
2837	Bromeliaceae	Tillandsia takizawae	EpiList (corrected)	Tillandsia takizawae
2838	Bromeliaceae	Tillandsia tandapiana	EpiList (corrected)	Tillandsia tandapiana
2839	Bromeliaceae	Tillandsia taxcoensis	EpiList (corrected)	Tillandsia taxcoensis
2840	Bromeliaceae	Tillandsia tecpanensis	EpiList (corrected)	Tillandsia tecpanensis
2841	Bromeliaceae	Tillandsia tectorum	EpiList (corrected)	Tillandsia tectorum
2842	Bromeliaceae	Tillandsia tehuacana	EpiList (corrected)	Tillandsia tehuacana
2843	Bromeliaceae	Tillandsia teloloapanensis	EpiList (corrected)	Tillandsia teloloapanensis
2844	Bromeliaceae	Tillandsia tenebra	EpiList (corrected)	Tillandsia tenebra
2845	Bromeliaceae	Tillandsia tenuifolia	EpiList (corrected)	Tillandsia tenuifolia
2846	Bromeliaceae	Tillandsia tenuispica	EpiList (corrected)	Tillandsia tenuispica
2847	Bromeliaceae	Tillandsia teres	EpiList (corrected)	Tillandsia teres
2848	Bromeliaceae	Tillandsia tetrantha	EpiList (corrected)	Tillandsia tetrantha
2849	Bromeliaceae	Tillandsia thiekenii	EpiList (corrected)	Tillandsia thiekenii
2850	Bromeliaceae	Tillandsia thyrsigera	EpiList (corrected)	Tillandsia thyrsigera
2851	Bromeliaceae	Tillandsia tillii	EpiList (corrected)	Tillandsia tillii
2852	Bromeliaceae	Tillandsia tomasii	EpiList (corrected)	Tillandsia tomasii
2853	Bromeliaceae	Tillandsia tomekii	EpiList (corrected)	Tillandsia tomekii
2854	Bromeliaceae	Tillandsia tonalaensis	EpiList (corrected)	Tillandsia tonalaensis
2855	Bromeliaceae	Tillandsia toropiensis	EpiList (corrected)	Tillandsia toropiensis
2856	Bromeliaceae	Tillandsia tortilis	EpiList (corrected)	Tillandsia tortilis
2857	Bromeliaceae	Tillandsia tovarensis	EpiList (corrected)	Tillandsia tovarensis
2858	Bromeliaceae	Tillandsia tragophoba	EpiList (corrected)	Tillandsia tragophoba
2859	Bromeliaceae	Tillandsia trapeziformis	EpiList (corrected)	Tillandsia trapeziformis
2860	Bromeliaceae	Tillandsia trauneri	EpiList (corrected)	Tillandsia trauneri
2861	Bromeliaceae	Tillandsia trelawniensis	EpiList (corrected)	Tillandsia trelawniensis
2862	Bromeliaceae	Tillandsia tricholepis	EpiList (corrected)	Tillandsia tricholepis
2863	Bromeliaceae	Tillandsia tricolor	EpiList (corrected)	Tillandsia tricolor
2864	Bromeliaceae	Tillandsia trigalensis	EpiList (corrected)	Tillandsia trigalensis
2865	Bromeliaceae	Tillandsia triglochinoides	EpiList (corrected)	Tillandsia triglochinoides
2866	Bromeliaceae	Tillandsia tripinnata	EpiList (corrected)	Tillandsia tripinnata
2867	Bromeliaceae	Tillandsia truncata	EpiList (corrected)	Tillandsia truncata
2868	Bromeliaceae	Tillandsia truxillana	EpiList (corrected)	Tillandsia truxillana
2869	Bromeliaceae	Tillandsia turneri	EpiList (corrected)	Tillandsia turneri
2870	Bromeliaceae	Tillandsia turquinensis	EpiList (corrected)	Tillandsia turquinensis
2871	Bromeliaceae	Tillandsia ulrici	EpiList (corrected)	Tillandsia ulrici
2872	Bromeliaceae	Tillandsia ultima	EpiList (corrected)	Tillandsia ultima
2873	Bromeliaceae	Tillandsia umbellata	EpiList (corrected)	Tillandsia umbellata
2874	Bromeliaceae	Tillandsia undulifolia	EpiList (corrected)	Tillandsia undulifolia
2875	Bromeliaceae	Tillandsia usneoides	EpiList (corrected)	Tillandsia usneoides
2876	Bromeliaceae	Tillandsia utriculata	EpiList (corrected)	Tillandsia utriculata
2877	Bromeliaceae	Tillandsia variabilis	EpiList (corrected)	Tillandsia variabilis
2878	Bromeliaceae	Tillandsia velutina	EpiList (corrected)	Tillandsia velutina
2879	Bromeliaceae	Tillandsia ventanaensis	EpiList (corrected)	Tillandsia ventanaensis
2880	Bromeliaceae	Tillandsia venusta	EpiList (corrected)	Tillandsia venusta
2881	Bromeliaceae	Tillandsia verapazana	EpiList (corrected)	Tillandsia verapazana
2882	Bromeliaceae	Tillandsia vernardoi	EpiList (corrected)	Tillandsia vernardoi
2883	Bromeliaceae	Tillandsia vernicosa	EpiList (corrected)	Tillandsia vernicosa
2884	Bromeliaceae	Tillandsia vicentina	EpiList (corrected)	Tillandsia vicentina
2885	Bromeliaceae	Tillandsia violacea	EpiList (corrected)	Tillandsia violacea
2886	Bromeliaceae	Tillandsia violaceiflora	EpiList (corrected)	Tillandsia violaceiflora
2887	Bromeliaceae	Tillandsia violascens	EpiList (corrected)	Tillandsia violascens
2888	Bromeliaceae	Tillandsia viridiflora	EpiList (corrected)	Tillandsia viridiflora
2889	Bromeliaceae	Tillandsia vriesioides	EpiList (corrected)	Tillandsia vriesioides
2890	Bromeliaceae	Tillandsia wagneriana	EpiList (corrected)	Tillandsia wagneriana
2892	Bromeliaceae	Tillandsia walter-richteri	EpiList (corrected)	Tillandsia walter-richteri
2893	Bromeliaceae	Tillandsia walter-tillii	EpiList (corrected)	Tillandsia walter-tillii
2891	Bromeliaceae	Tillandsia walteri	EpiList (corrected)	Tillandsia walteri
2894	Bromeliaceae	Tillandsia weberi	EpiList (corrected)	Tillandsia weberi
2895	Bromeliaceae	Tillandsia welzii	EpiList (corrected)	Tillandsia welzii
2896	Bromeliaceae	Tillandsia werdermannii	EpiList (corrected)	Tillandsia werdermannii
2898	Bromeliaceae	Tillandsia werner-rauhiana	EpiList (corrected)	Tillandsia werner-rauhiana
2897	Bromeliaceae	Tillandsia werneriana	EpiList (corrected)	Tillandsia werneriana
2899	Bromeliaceae	Tillandsia winkleri	EpiList (corrected)	Tillandsia winkleri
2900	Bromeliaceae	Tillandsia wuelfinghoffii	EpiList (corrected)	Tillandsia wuelfinghoffii
2901	Bromeliaceae	Tillandsia wurdackii	EpiList (corrected)	Tillandsia wurdackii
2902	Bromeliaceae	Tillandsia xerographica	EpiList (corrected)	Tillandsia xerographica
2903	Bromeliaceae	Tillandsia xiphioides	EpiList (corrected)	Tillandsia xiphioides
2904	Bromeliaceae	Tillandsia yerba-santae	EpiList (corrected)	Tillandsia yerba-santae
2905	Bromeliaceae	Tillandsia yuncharaensis	EpiList (corrected)	Tillandsia yuncharaensis
2906	Bromeliaceae	Tillandsia yunckeri	EpiList (corrected)	Tillandsia yunckeri
2907	Bromeliaceae	Tillandsia yutaninoensis	EpiList (corrected)	Tillandsia yutaninoensis
2908	Bromeliaceae	Tillandsia zacapanensis	EpiList (corrected)	Tillandsia zacapanensis
2909	Bromeliaceae	Tillandsia zacualpanensis	EpiList (corrected)	Tillandsia zacualpanensis
2910	Bromeliaceae	Tillandsia zaragozaensis	EpiList (corrected)	Tillandsia zaragozaensis
2911	Bromeliaceae	Tillandsia zaratensis	EpiList (corrected)	Tillandsia zaratensis
2912	Bromeliaceae	Tillandsia zarumensis	EpiList (corrected)	Tillandsia zarumensis
2913	Bromeliaceae	Tillandsia zecheri	EpiList (corrected)	Tillandsia zecheri
2914	Bromeliaceae	Tillandsia zoquensis	EpiList (corrected)	Tillandsia zoquensis
2915	Bromeliaceae	Vriesea acuminata	EpiList (corrected)	Vriesea acuminata
2916	Bromeliaceae	Vriesea agostiniana	EpiList (corrected)	Vriesea agostiniana
2917	Bromeliaceae	Vriesea alta	EpiList (corrected)	Vriesea alta
2918	Bromeliaceae	Vriesea altimontana	EpiList (corrected)	Vriesea altimontana
2919	Bromeliaceae	Vriesea altodaserrae	EpiList (corrected)	Vriesea altodaserrae
2920	Bromeliaceae	Vriesea altomayoensis	EpiList (corrected)	Vriesea altomayoensis
2921	Bromeliaceae	Vriesea amadoi	EpiList (corrected)	Vriesea amadoi
2922	Bromeliaceae	Vriesea amazonica	EpiList (corrected)	Vriesea amazonica
2923	Bromeliaceae	Vriesea amethystina	EpiList (corrected)	Vriesea amethystina
1702	Bromeliaceae	Vriesea amicora	EpiList (corrected)	Cipuropsis amicorum
2270	Bromeliaceae	Vriesea amicora	EpiList (corrected)	Tillandsia amicorum
2924	Bromeliaceae	Vriesea ampla	EpiList (corrected)	Vriesea ampla
2925	Bromeliaceae	Vriesea andreettae	EpiList (corrected)	Vriesea andreettae
2926	Bromeliaceae	Vriesea antillana	EpiList (corrected)	Vriesea antillana
2927	Bromeliaceae	Vriesea apiculata	EpiList (corrected)	Vriesea apiculata
2928	Bromeliaceae	Vriesea appariciana	EpiList (corrected)	Vriesea appariciana
2929	Bromeliaceae	Vriesea appendiculata	EpiList (corrected)	Vriesea appendiculata
2930	Bromeliaceae	Vriesea arachnoidea	EpiList (corrected)	Vriesea arachnoidea
2931	Bromeliaceae	Vriesea arpocalyx	EpiList (corrected)	Vriesea arpocalyx
2284	Bromeliaceae	Vriesea asplundii	EpiList (corrected)	Tillandsia asplundii
2932	Bromeliaceae	Vriesea atra	EpiList (corrected)	Vriesea atra
2933	Bromeliaceae	Vriesea atrococcinea	EpiList (corrected)	Vriesea atrococcinea
2934	Bromeliaceae	Vriesea attenuata	EpiList (corrected)	Vriesea attenuata
2935	Bromeliaceae	Vriesea balanophora	EpiList (corrected)	Vriesea balanophora
2936	Bromeliaceae	Vriesea barbosae	EpiList (corrected)	Vriesea barbosae
2937	Bromeliaceae	Vriesea barii	EpiList (corrected)	Vriesea barii
2938	Bromeliaceae	Vriesea barilletii	EpiList (corrected)	Vriesea barilletii
2939	Bromeliaceae	Vriesea belloi	EpiList (corrected)	Vriesea belloi
2940	Bromeliaceae	Vriesea bi-beatricis	EpiList (corrected)	Vriesea bi-beatricis
2941	Bromeliaceae	Vriesea bicolor	EpiList (corrected)	Vriesea bicolor
2942	Bromeliaceae	Vriesea biguassuensis	EpiList (corrected)	Vriesea biguassuensis
2943	Bromeliaceae	Vriesea billbergioides	EpiList (corrected)	Vriesea billbergioides
2944	Bromeliaceae	Vriesea bituminosa	EpiList (corrected)	Vriesea bituminosa
2945	Bromeliaceae	Vriesea blackburniana	EpiList (corrected)	Vriesea blackburniana
2946	Bromeliaceae	Vriesea bleheri	EpiList (corrected)	Vriesea bleheri
2947	Bromeliaceae	Vriesea boeghii	EpiList (corrected)	Vriesea boeghii
2948	Bromeliaceae	Vriesea bracteosa	EpiList (corrected)	Vriesea bracteosa
2949	Bromeliaceae	Vriesea breviscapa	EpiList (corrected)	Vriesea breviscapa
2950	Bromeliaceae	Vriesea broadwayi	EpiList (corrected)	Vriesea broadwayi
2951	Bromeliaceae	Vriesea brunei	EpiList (corrected)	Vriesea brunei
2952	Bromeliaceae	Vriesea brusquensis	EpiList (corrected)	Vriesea brusquensis
2953	Bromeliaceae	Vriesea burgeri	EpiList (corrected)	Vriesea burgeri
2954	Bromeliaceae	Vriesea calimaniana	EpiList (corrected)	Vriesea calimaniana
2955	Bromeliaceae	Vriesea camptoclada	EpiList (corrected)	Vriesea camptoclada
2956	Bromeliaceae	Vriesea capitata	EpiList (corrected)	Vriesea capitata
2957	Bromeliaceae	Vriesea capixabae	EpiList (corrected)	Vriesea capixabae
2958	Bromeliaceae	Vriesea carinata	EpiList (corrected)	Vriesea carinata
2959	Bromeliaceae	Vriesea castaneobulbosa	EpiList (corrected)	Vriesea castaneobulbosa
2960	Bromeliaceae	Vriesea cathcartii	EpiList (corrected)	Vriesea cathcartii
2961	Bromeliaceae	Vriesea cearensis	EpiList (corrected)	Vriesea cearensis
2962	Bromeliaceae	Vriesea cereicola	EpiList (corrected)	Vriesea cereicola
2963	Bromeliaceae	Vriesea chrysostachys	EpiList (corrected)	Vriesea chrysostachys
2964	Bromeliaceae	Vriesea claudiana	EpiList (corrected)	Vriesea claudiana
2965	Bromeliaceae	Vriesea colnagoi	EpiList (corrected)	Vriesea colnagoi
2966	Bromeliaceae	Vriesea comata	EpiList (corrected)	Vriesea comata
2967	Bromeliaceae	Vriesea confusa	EpiList (corrected)	Vriesea confusa
2968	Bromeliaceae	Vriesea corcovadensis	EpiList (corrected)	Vriesea corcovadensis
2969	Bromeliaceae	Vriesea correia-arauji	EpiList (corrected)	Vriesea correia-arauji
2970	Bromeliaceae	Vriesea costae	EpiList (corrected)	Vriesea costae
2971	Bromeliaceae	Vriesea cowellii	EpiList (corrected)	Vriesea cowellii
2972	Bromeliaceae	Vriesea croceana	EpiList (corrected)	Vriesea croceana
2973	Bromeliaceae	Vriesea curvispica	EpiList (corrected)	Vriesea curvispica
2974	Bromeliaceae	Vriesea cylindrica	EpiList (corrected)	Vriesea cylindrica
2975	Bromeliaceae	Vriesea debilis	EpiList (corrected)	Vriesea debilis
2976	Bromeliaceae	Vriesea declinata	EpiList (corrected)	Vriesea declinata
2977	Bromeliaceae	Vriesea delicatula	EpiList (corrected)	Vriesea delicatula
2978	Bromeliaceae	Vriesea diantha	EpiList (corrected)	Vriesea diantha
2979	Bromeliaceae	Vriesea dictyographa	EpiList (corrected)	Vriesea dictyographa
2980	Bromeliaceae	Vriesea diffusa	EpiList (corrected)	Vriesea diffusa
2450	Bromeliaceae	Vriesea dissitiflora	EpiList (corrected)	Tillandsia excelsa
2981	Bromeliaceae	Vriesea dodsonii	EpiList (corrected)	Vriesea dodsonii
2982	Bromeliaceae	Vriesea drepanocarpa	EpiList (corrected)	Vriesea drepanocarpa
2983	Bromeliaceae	Vriesea dressleri	EpiList (corrected)	Vriesea dressleri
2984	Bromeliaceae	Vriesea drewii	EpiList (corrected)	Vriesea drewii
2985	Bromeliaceae	Vriesea dubia	EpiList (corrected)	Vriesea dubia
2986	Bromeliaceae	Vriesea duidae	EpiList (corrected)	Vriesea duidae
2987	Bromeliaceae	Vriesea duvaliana	EpiList (corrected)	Vriesea duvaliana
2988	Bromeliaceae	Vriesea elata	EpiList (corrected)	Vriesea elata
2989	Bromeliaceae	Vriesea eltoniana	EpiList (corrected)	Vriesea eltoniana
2990	Bromeliaceae	Vriesea ensiformis	EpiList (corrected)	Vriesea ensiformis
2991	Bromeliaceae	Vriesea erythrodactylon	EpiList (corrected)	Vriesea erythrodactylon
2992	Bromeliaceae	Vriesea euclidiana	EpiList (corrected)	Vriesea euclidiana
2993	Bromeliaceae	Vriesea fabioi	EpiList (corrected)	Vriesea fabioi
2994	Bromeliaceae	Vriesea fenestralis	EpiList (corrected)	Vriesea fenestralis
2995	Bromeliaceae	Vriesea fibrosa	EpiList (corrected)	Vriesea fibrosa
2996	Bromeliaceae	Vriesea fidelensis	EpiList (corrected)	Vriesea fidelensis
2997	Bromeliaceae	Vriesea flammea	EpiList (corrected)	Vriesea flammea
2998	Bromeliaceae	Vriesea flava	EpiList (corrected)	Vriesea flava
2999	Bromeliaceae	Vriesea fluminensis	EpiList (corrected)	Vriesea fluminensis
3000	Bromeliaceae	Vriesea fontanae	EpiList (corrected)	Vriesea fontanae
3001	Bromeliaceae	Vriesea fontellana	EpiList (corrected)	Vriesea fontellana
3002	Bromeliaceae	Vriesea fontourae	EpiList (corrected)	Vriesea fontourae
3003	Bromeliaceae	Vriesea fosteriana	EpiList (corrected)	Vriesea fosteriana
3004	Bromeliaceae	Vriesea fradensis	EpiList (corrected)	Vriesea fradensis
3005	Bromeliaceae	Vriesea freicanecana	EpiList (corrected)	Vriesea freicanecana
3006	Bromeliaceae	Vriesea friburgensis	EpiList (corrected)	Vriesea friburgensis
3007	Bromeliaceae	Vriesea funebris	EpiList (corrected)	Vriesea funebris
3008	Bromeliaceae	Vriesea garlippiana	EpiList (corrected)	Vriesea garlippiana
3009	Bromeliaceae	Vriesea gastiniana	EpiList (corrected)	Vriesea gastiniana
3010	Bromeliaceae	Vriesea gibba	EpiList (corrected)	Vriesea gibba
3011	Bromeliaceae	Vriesea gigantea	EpiList (corrected)	Vriesea gigantea
3012	Bromeliaceae	Vriesea gladioliflora	EpiList (corrected)	Vriesea gladioliflora
3013	Bromeliaceae	Vriesea glutinosa	EpiList (corrected)	Vriesea glutinosa
3014	Bromeliaceae	Vriesea goniorhachis	EpiList (corrected)	Vriesea goniorachis
3015	Bromeliaceae	Vriesea gracilior	EpiList (corrected)	Vriesea gracilior
3016	Bromeliaceae	Vriesea graciliscapa	EpiList (corrected)	Vriesea graciliscapa
3017	Bromeliaceae	Vriesea gradata	EpiList (corrected)	Vriesea gradata
3018	Bromeliaceae	Vriesea graminifolia	EpiList (corrected)	Vriesea graminifolia
3019	Bromeliaceae	Vriesea grandiflora	EpiList (corrected)	Vriesea grandiflora
3020	Bromeliaceae	Vriesea guadelupensis	EpiList (corrected)	Vriesea guadelupensis
3021	Bromeliaceae	Vriesea guttata	EpiList (corrected)	Vriesea guttata
3022	Bromeliaceae	Vriesea haberi	EpiList (corrected)	Vriesea haberi
3023	Bromeliaceae	Vriesea hainesiorum	EpiList (corrected)	Vriesea hainesiorum
3024	Bromeliaceae	Vriesea haltonii	EpiList (corrected)	Vriesea haltonii
3025	Bromeliaceae	Vriesea haplostachya	EpiList (corrected)	Vriesea haplostachya
3026	Bromeliaceae	Vriesea harmsiana	EpiList (corrected)	Vriesea harmsiana
3027	Bromeliaceae	Vriesea harrylutheri	EpiList (corrected)	Vriesea harrylutheri
3028	Bromeliaceae	Vriesea heliconioides	EpiList (corrected)	Vriesea heliconioides
3029	Bromeliaceae	Vriesea heterostachys	EpiList (corrected)	Vriesea heterostachys
3030	Bromeliaceae	Vriesea hieroglyphica	EpiList (corrected)	Vriesea hieroglyphica
3031	Bromeliaceae	Vriesea hitchcockiana	EpiList (corrected)	Vriesea hitchcockiana
3032	Bromeliaceae	Vriesea hodgei	EpiList (corrected)	Vriesea hodgei
3033	Bromeliaceae	Vriesea hydrophora	EpiList (corrected)	Vriesea hydrophora
3034	Bromeliaceae	Vriesea hygrometrica	EpiList (corrected)	Vriesea hygrometrica
3035	Bromeliaceae	Vriesea incurva	EpiList (corrected)	Vriesea incurva
3036	Bromeliaceae	Vriesea incurvata	EpiList (corrected)	Vriesea incurvata
3037	Bromeliaceae	Vriesea inflata	EpiList (corrected)	Vriesea inflata
2533	Bromeliaceae	Vriesea insignis	EpiList (corrected)	Tillandsia insignis
3038	Bromeliaceae	Vriesea interrogatoria	EpiList (corrected)	Vriesea interrogatoria
3039	Bromeliaceae	Vriesea itatiaiae	EpiList (corrected)	Vriesea itatiaiae
3040	Bromeliaceae	Vriesea johnstonii	EpiList (corrected)	Vriesea johnstonii
3041	Bromeliaceae	Vriesea jonesiana	EpiList (corrected)	Vriesea jonesiana
3042	Bromeliaceae	Vriesea jonghei	EpiList (corrected)	Vriesea jonghei
3043	Bromeliaceae	Vriesea joyae	EpiList (corrected)	Vriesea joyae
3044	Bromeliaceae	Vriesea kathyae	EpiList (corrected)	Vriesea kathyae
3045	Bromeliaceae	Vriesea kautskyana	EpiList (corrected)	Vriesea kautskyana
3046	Bromeliaceae	Vriesea kentii	EpiList (corrected)	Vriesea kentii
3047	Bromeliaceae	Vriesea kupperiana	EpiList (corrected)	Vriesea kupperiana
3048	Bromeliaceae	Vriesea lancifolia	EpiList (corrected)	Vriesea lancifolia
3049	Bromeliaceae	Vriesea languida	EpiList (corrected)	Vriesea languida
3050	Bromeliaceae	Vriesea latissima	EpiList (corrected)	Vriesea latissima
3051	Bromeliaceae	Vriesea laxa	EpiList (corrected)	Vriesea laxa
3052	Bromeliaceae	Vriesea leptantha	EpiList (corrected)	Vriesea leptantha
3053	Bromeliaceae	Vriesea leptopoda	EpiList (corrected)	Vriesea leptopoda
3054	Bromeliaceae	Vriesea leucophylla	EpiList (corrected)	Vriesea leucophylla
3055	Bromeliaceae	Vriesea lidicensis	EpiList (corrected)	Vriesea lidicensis
3056	Bromeliaceae	Vriesea lilliputiana	EpiList (corrected)	Vriesea lilliputiana
3057	Bromeliaceae	Vriesea limae	EpiList (corrected)	Vriesea limae
3058	Bromeliaceae	Vriesea limonensis	EpiList (corrected)	Vriesea limonensis
3059	Bromeliaceae	Vriesea linharesiae	EpiList (corrected)	Vriesea linharesiae
3060	Bromeliaceae	Vriesea longicaulis	EpiList (corrected)	Vriesea longicaulis
3061	Bromeliaceae	Vriesea longiscapa	EpiList (corrected)	Vriesea longiscapa
3062	Bromeliaceae	Vriesea longisepala	EpiList (corrected)	Vriesea longisepala
3063	Bromeliaceae	Vriesea longistaminea	EpiList (corrected)	Vriesea longistaminea
3064	Bromeliaceae	Vriesea lubbersii	EpiList (corrected)	Vriesea lubbersii
3065	Bromeliaceae	Vriesea luis-gomezii	EpiList (corrected)	Vriesea luis-gomezii
3066	Bromeliaceae	Vriesea lutheriana	EpiList (corrected)	Vriesea lutheriana
3067	Bromeliaceae	Vriesea lymansmithii	EpiList (corrected)	Vriesea lyman-smithii
3068	Bromeliaceae	Vriesea macrantha	EpiList (corrected)	Vriesea macrantha
3069	Bromeliaceae	Vriesea macrochlamys	EpiList (corrected)	Vriesea macrochlamys
3070	Bromeliaceae	Vriesea macrostachya	EpiList (corrected)	Vriesea macrostachya
3071	Bromeliaceae	Vriesea maculosa	EpiList (corrected)	Vriesea maculosa
3072	Bromeliaceae	Vriesea maguirei	EpiList (corrected)	Vriesea maguirei
3074	Bromeliaceae	Vriesea marnier-lapostollei	EpiList (corrected)	Vriesea marnier-lapostollei
3075	Bromeliaceae	Vriesea maxoniana	EpiList (corrected)	Vriesea maxoniana
3076	Bromeliaceae	Vriesea menescalii	EpiList (corrected)	Vriesea menescalii
3077	Bromeliaceae	Vriesea michaelii	EpiList (corrected)	Vriesea michaelii
3078	Bromeliaceae	Vriesea microrhachis	EpiList (corrected)	Vriesea microrachis
3079	Bromeliaceae	Vriesea minuta	EpiList (corrected)	Vriesea minuta
3080	Bromeliaceae	Vriesea minutiflora	EpiList (corrected)	Vriesea minutiflora
3081	Bromeliaceae	Vriesea modesta	EpiList (corrected)	Vriesea modesta
3082	Bromeliaceae	Vriesea mollis	EpiList (corrected)	Vriesea mollis
3083	Bromeliaceae	Vriesea monacorum	EpiList (corrected)	Vriesea monacorum
3084	Bromeliaceae	Vriesea monstra	EpiList (corrected)	Vriesea monstrum
3085	Bromeliaceae	Vriesea montana	EpiList (corrected)	Vriesea montana
3086	Bromeliaceae	Vriesea morrenii	EpiList (corrected)	Vriesea morrenii
3087	Bromeliaceae	Vriesea muelleri	EpiList (corrected)	Vriesea muelleri
3088	Bromeliaceae	Vriesea multifoliata	EpiList (corrected)	Vriesea multifoliata
3089	Bromeliaceae	Vriesea neoglutinosa	EpiList (corrected)	Vriesea neoglutinosa
3090	Bromeliaceae	Vriesea noblickii	EpiList (corrected)	Vriesea noblickii
3091	Bromeliaceae	Vriesea nocturna	EpiList (corrected)	Vriesea nocturna
3092	Bromeliaceae	Vriesea notata	EpiList (corrected)	Vriesea notata
3093	Bromeliaceae	Vriesea nubicola	EpiList (corrected)	Vriesea nubicola
3094	Bromeliaceae	Vriesea nutans	EpiList (corrected)	Vriesea nutans
3095	Bromeliaceae	Vriesea ochracea	EpiList (corrected)	Vriesea ochracea
3097	Bromeliaceae	Vriesea oligantha	EpiList (corrected)	Vriesea oligantha
3098	Bromeliaceae	Vriesea olmosana	EpiList (corrected)	Vriesea olmosana
3099	Bromeliaceae	Vriesea orjuelae	EpiList (corrected)	Vriesea orjuelae
3100	Bromeliaceae	Vriesea ororiensis	EpiList (corrected)	Vriesea ororiensis
3101	Bromeliaceae	Vriesea osaensis	EpiList (corrected)	Vriesea osaensis
3102	Bromeliaceae	Vriesea ospinae	EpiList (corrected)	Vriesea ospinae
3103	Bromeliaceae	Vriesea oxapampae	EpiList (corrected)	Vriesea oxapampae
3104	Bromeliaceae	Vriesea pabstii	EpiList (corrected)	Vriesea pabstii
3105	Bromeliaceae	Vriesea panamaensis	EpiList (corrected)	Vriesea panamaensis
3106	Bromeliaceae	Vriesea paradoxa	EpiList (corrected)	Vriesea paradoxa
3107	Bromeliaceae	Vriesea paraibica	EpiList (corrected)	Vriesea paraibica
3108	Bromeliaceae	Vriesea paratiensis	EpiList (corrected)	Vriesea paratiensis
3109	Bromeliaceae	Vriesea pardalina	EpiList (corrected)	Vriesea pardalina
3110	Bromeliaceae	Vriesea parviflora	EpiList (corrected)	Vriesea parviflora
3111	Bromeliaceae	Vriesea parvula	EpiList (corrected)	Vriesea parvula
3112	Bromeliaceae	Vriesea pastuchoffiana	EpiList (corrected)	Vriesea pastuchoffiana
3113	Bromeliaceae	Vriesea patula	EpiList (corrected)	Vriesea patula
3114	Bromeliaceae	Vriesea patzeltii	EpiList (corrected)	Vriesea patzeltii
3115	Bromeliaceae	Vriesea pauciflora	EpiList (corrected)	Vriesea pauciflora
3116	Bromeliaceae	Vriesea paupera	EpiList (corrected)	Vriesea paupera
3117	Bromeliaceae	Vriesea pauperrima	EpiList (corrected)	Vriesea pauperrima
3118	Bromeliaceae	Vriesea pectinata	EpiList (corrected)	Vriesea pectinata
3119	Bromeliaceae	Vriesea pedicellata	EpiList (corrected)	Vriesea pedicellata
3120	Bromeliaceae	Vriesea penduliflora	EpiList (corrected)	Vriesea penduliflora
3121	Bromeliaceae	Vriesea penduliscapa	EpiList (corrected)	Vriesea penduliscapa
3122	Bromeliaceae	Vriesea pereirae	EpiList (corrected)	Vriesea pereirae
3123	Bromeliaceae	Vriesea pereziana	EpiList (corrected)	Vriesea pereziana
3124	Bromeliaceae	Vriesea petraea	EpiList (corrected)	Vriesea petraea
3125	Bromeliaceae	Vriesea philippocoburgii	EpiList (corrected)	Vriesea philippocoburgii
3126	Bromeliaceae	Vriesea picta	EpiList (corrected)	Vriesea picta
3127	Bromeliaceae	Vriesea pinottii	EpiList (corrected)	Vriesea pinottii
3128	Bromeliaceae	Vriesea piscatrix	EpiList (corrected)	Vriesea piscatrix
3129	Bromeliaceae	Vriesea pittieri	EpiList (corrected)	Vriesea pittieri
3130	Bromeliaceae	Vriesea platynema	EpiList (corrected)	Vriesea platynema
3131	Bromeliaceae	Vriesea platzmannii	EpiList (corrected)	Vriesea platzmannii
1861	Bromeliaceae	Vriesea pleiosticha	EpiList (corrected)	Guzmania pleiosticha
3132	Bromeliaceae	Vriesea plurifolia	EpiList (corrected)	Vriesea plurifolia
3133	Bromeliaceae	Vriesea poenulata	EpiList (corrected)	Vriesea poenulata
3134	Bromeliaceae	Vriesea procera	EpiList (corrected)	Vriesea procera
3241	Bromeliaceae	Vriesea proctorii	EpiList (corrected)	Werauhia proctorii
3135	Bromeliaceae	Vriesea pseudoatra	EpiList (corrected)	Vriesea pseudoatra
3136	Bromeliaceae	Vriesea psittacina	EpiList (corrected)	Vriesea psittacina
3137	Bromeliaceae	Vriesea pulchra	EpiList (corrected)	Vriesea pulchra
3138	Bromeliaceae	Vriesea punctulata	EpiList (corrected)	Vriesea punctulata
3139	Bromeliaceae	Vriesea pycnantha	EpiList (corrected)	Vriesea pycnantha
3140	Bromeliaceae	Vriesea racinae	EpiList (corrected)	Vriesea racinae
3141	Bromeliaceae	Vriesea rafaelii	EpiList (corrected)	Vriesea rafaelii
3142	Bromeliaceae	Vriesea rastrensis	EpiList (corrected)	Vriesea rastrensis
3143	Bromeliaceae	Vriesea rectifolia	EpiList (corrected)	Vriesea rectifolia
3144	Bromeliaceae	Vriesea recurvata	EpiList (corrected)	Vriesea recurvata
3145	Bromeliaceae	Vriesea regnellii	EpiList (corrected)	Vriesea regnellii
3146	Bromeliaceae	Vriesea reitzii	EpiList (corrected)	Vriesea reitzii
3147	Bromeliaceae	Vriesea repandostachys	EpiList (corrected)	Vriesea repandostachys
3148	Bromeliaceae	Vriesea revoluta	EpiList (corrected)	Vriesea revoluta
3149	Bromeliaceae	Vriesea rhodostachys	EpiList (corrected)	Vriesea rhodostachys
3150	Bromeliaceae	Vriesea ringens	EpiList (corrected)	Vriesea ringens
3151	Bromeliaceae	Vriesea roberto-seidelii	EpiList (corrected)	Vriesea roberto-seidelii
3152	Bromeliaceae	Vriesea robusta	EpiList (corrected)	Vriesea robusta
3153	Bromeliaceae	Vriesea rodigasiana	EpiList (corrected)	Vriesea rodigasiana
3154	Bromeliaceae	Vriesea roethii	EpiList (corrected)	Vriesea roethii
3155	Bromeliaceae	Vriesea rubens	EpiList (corrected)	Vriesea rubens
3156	Bromeliaceae	Vriesea rubra	EpiList (corrected)	Vriesea rubra
3157	Bromeliaceae	Vriesea rubyae	EpiList (corrected)	Vriesea rubyae
3158	Bromeliaceae	Vriesea rugosa	EpiList (corrected)	Vriesea rugosa
3159	Bromeliaceae	Vriesea ruschii	EpiList (corrected)	Vriesea ruschii
3160	Bromeliaceae	Vriesea sagasteguii	EpiList (corrected)	Vriesea sagasteguii
3161	Bromeliaceae	Vriesea sanctateresensis	EpiList (corrected)	Vriesea sanctateresensis
3162	Bromeliaceae	Vriesea sandrae	EpiList (corrected)	Vriesea sandrae
3163	Bromeliaceae	Vriesea sanfranciscana	EpiList (corrected)	Vriesea sanfranciscana
3164	Bromeliaceae	Vriesea sanguinolenta	EpiList (corrected)	Vriesea sanguinolenta
3165	Bromeliaceae	Vriesea santaleopoldinensis	EpiList (corrected)	Vriesea santaleopoldinensis
3166	Bromeliaceae	Vriesea saundersiae	EpiList (corrected)	Vriesea saundersii
3167	Bromeliaceae	Vriesea sazimae	EpiList (corrected)	Vriesea sazimae
3168	Bromeliaceae	Vriesea scalaris	EpiList (corrected)	Vriesea scalaris
3169	Bromeliaceae	Vriesea sceptrum	EpiList (corrected)	Vriesea sceptrum
2787	Bromeliaceae	Vriesea schimperiana	EpiList (corrected)	Tillandsia schimperiana
3170	Bromeliaceae	Vriesea schultesiana	EpiList (corrected)	Vriesea schultesiana
3171	Bromeliaceae	Vriesea schunkei	EpiList (corrected)	Vriesea schunkii
3172	Bromeliaceae	Vriesea schwackeana	EpiList (corrected)	Vriesea schwackeana
3173	Bromeliaceae	Vriesea secundiflora	EpiList (corrected)	Vriesea secundiflora
3174	Bromeliaceae	Vriesea segadas-viannae	EpiList (corrected)	Vriesea segadas-viannae
3175	Bromeliaceae	Vriesea seideliana	EpiList (corrected)	Vriesea seideliana
3176	Bromeliaceae	Vriesea serrana	EpiList (corrected)	Vriesea serrana
3177	Bromeliaceae	Vriesea serranegrensis	EpiList (corrected)	Vriesea serranegrensis
3179	Bromeliaceae	Vriesea silva-petrea	EpiList (corrected)	Vriesea silva-petrea
3178	Bromeliaceae	Vriesea silvana	EpiList (corrected)	Vriesea silvana
3180	Bromeliaceae	Vriesea simplex	EpiList (corrected)	Vriesea simplex
3181	Bromeliaceae	Vriesea sincorana	EpiList (corrected)	Vriesea sincorana
2804	Bromeliaceae	Vriesea singularis	EpiList (corrected)	Tillandsia singularis
3182	Bromeliaceae	Vriesea singuliflora	EpiList (corrected)	Vriesea singuliflora
3183	Bromeliaceae	Vriesea sintenisii	EpiList (corrected)	Vriesea sintenisii
3184	Bromeliaceae	Vriesea soderstromii	EpiList (corrected)	Vriesea soderstromii
3185	Bromeliaceae	Vriesea sparsiflora	EpiList (corrected)	Vriesea sparsiflora
3186	Bromeliaceae	Vriesea speckmaieri	EpiList (corrected)	Vriesea speckmaieri
3187	Bromeliaceae	Vriesea splendens	EpiList (corrected)	Vriesea splendens
3188	Bromeliaceae	Vriesea stenophylla	EpiList (corrected)	Vriesea stenophylla
3189	Bromeliaceae	Vriesea stricta	EpiList (corrected)	Vriesea stricta
[truncated: 24,064 more rows]
