# Supplementary material for: Conservation status of vascular epiphytes in the Neotropics
Source: Research Square preprint supplement (doi:10.21203/rs.3.rs-2773328/v1), 2023-04-05
Supplement: Supplementary file 1 [file 9ec347a7ca2346f8da523b8a.pdf]

## Supporting information

### *Conservation status of vascular epiphytes in the Neotropics*

Maria Judith Carmona-Higuita. Centro de Investigaciones Tropicales, Universidad Veracruzana, Xalapa, México. ORCID: 0000-0002-1865-9095

Corresponding author: [judith.carmona@udea.edu.co](mailto:judith.carmona@udea.edu.co)

## Contents

|                                                                                       |    |
|---------------------------------------------------------------------------------------|----|
| <i>Supporting Methods</i>                                                             | 2  |
| SM1. Data from papers (literature review)                                             | 2  |
| <i>Supporting Tables</i>                                                              | 3  |
| Table S1. List of references used for the data-from-papers source (literature review) | 3  |
| Table S2. List of data sources.                                                       | 58 |
| Table S3. Reviewed EpiList                                                            | 61 |
| Table S4. Automated assessment results per species.                                   | 62 |
| Table S5. Category IUCN Red List.                                                     | 63 |

## Supporting Methods

### *SM1. Data from papers (literature review)*

Between March 3<sup>rd</sup> and November 16<sup>th</sup>, 2021, we gathered references containing monographs, floras, protologues, book chapters, scientific papers, Bachelor, Master, and Doctoral theses. A total of 7,732 references were obtained for the Neotropical region. The epiphyte studies were selected according to the following criteria: (1) studies that considered the trees as sampling units, (2) studies that evaluated the base, trunk, or canopy of trees, (3) inventory studies from a locality, (4) new species discovered or recorded, (5) autecology, (6) population dynamic or population ecology, (7) interaction network studies, and (8) herbarium records. To facilitate the search, the following keywords were used: "epiphyt\*", "species richness", "vegetation", "flora", "composition", "diversity", "inventory", "orchid", "bromeli\*", "fern", "bryophyte".

These keywords were used individually and combined. For example: "epiphyt\*" AND "inventory", "epiphyt\*" AND "diversity", "epiphyt\*" AND "species richness", "epiphyt\*" AND "composition", "epiphyt\*" AND "flora".

Only the references that contain species lists as supporting information were retained: 608 for Neotropical countries (except Brazil), 46 for Amazonia, 13 for the Caatinga, 26 for the Cerrado (including 2 of ecotono), and seven for the Pantanal. This resulting database contains 700 references (Table S2) and 25,741 records (see occurrences -per request-, in the column *source* as “data-from-papers”) in a time frame between 1920 to 2021.

The database was lumped together with the other data sources for geographic cleaning and taxonomic curatorship.

## Supporting Tables

Table S1. List of references used for the data-from-papers source (literature review)

**Note:** the database includes the following columns: (1) id: a consecutive number, (2) Region: can be Neotropics, Amazonia, Cerrado or Pantanal+Caatinga, (3) Source: a citation of the paper in the following format: one author: AuthorYear. Two authors: Author1 & Author2Year. Three+ authors: Author1 et al. Year (we respected the spaces and no-spaces). The "author" was taken as the first last name; (4) Year: the year of publication of the paper, (5) Author: author(s) of the paper, (6) Title: the title of the reference, (7) Journal: the journal in which the paper was published (if applicable), (8) Country: the country of the data reported on the paper.

| id | Region   | Source                | Year | Author                                                                                                                                           | Title                                                                                                                                                   | Journal                 | Country |
|----|----------|-----------------------|------|--------------------------------------------------------------------------------------------------------------------------------------------------|---------------------------------------------------------------------------------------------------------------------------------------------------------|-------------------------|---------|
| 1  | Amazonia | Quaresma & Jardim2011 | 2011 | Adriano Costa Quaresma, Mário Augusto G. Jardim                                                                                                  | Diversidade de bromeliáceas epífitas na Área de Proteção Ambiental Ilha do Combu, Belém, Pará, Brasil                                                   | Acta Botanica Brasilica | Brasil  |
| 2  | Amazonia | Rodrigues et al.2003  | 2003 | Silvane Tavares Rodrigues, Samuel Soares de Almeida, Laíse de Holanda Cavalcante Andrade, Iva Carneiro Leão Barros, Maria Elizabeth van den Berg | Composição florística e abundância de pteridófitas em três ambientes da bacia do rio Guamá, Belém, Pará, Brasil                                         | Acta Amazonica          | Brasil  |
| 3  | Amazonia | Maciel2015            | 2015 | Sebastião Maciel                                                                                                                                 | Nephrolepis (Lomariopsidaceae - Polypodiopsida) na Amazônia brasileira                                                                                  | Rodriguésia             | Brasil  |
| 4  | Amazonia | Koch et al.2013       | 2013 | Ana Kelly Koch, João Ubiratan Moreira dos Santos e Anna Luiza Ilkiu-Borges                                                                       | Bromeliaceae epífitas de uma Área de Conservação da Amazônia brasileira                                                                                 | Rodriguésia             | Brasil  |
| 5  | Amazonia | Koch et al.2013       | 2013 | Ana Kelly Koch, João Ubiratan Moreira dos Santos e Anna Luiza Ilkiu-Borges                                                                       | Orchidaceae Epífitas de uma Área de Conservação da Amazônia brasileira                                                                                  | NA                      | Brasil  |
| 6  | Amazonia | Irume et al.2013      | 2013 | Mariana Victória Irume, Maria de Lourdes da Costa Soares Moraes, Charles Eugene Zartman and Iêda Leão do Amaral                                  | Floristic composition and community structure of epiphytic angiosperms in a terra firme forest in central Amazonia                                      | Acta Botanica Brasilica | Brasil  |
| 7  | Amazonia | Magalhaes & Lopes2015 | 2015 | José Leonardo Lima Magalhães e Maria Aparecida Lopes                                                                                             | Riqueza De Espécies E Abundância De Epífitas Herbáceas De Fuste Baixo Em Relação Ao Tamanho Do Hospedeiro Arbóreo E Ao Tipo De Casca, Amazônia Oriental | Revista Árvore          | Brasil  |
| 8  | Amazonia | Quaresma et al.2017   | 2017 | Adriano C. Quaresma, Maria Teresa F. Piedade, Yuri Oliveira Feitosa, Florian Wittmann and Hans ter Steege                                        | Composition, diversity, and structure of vascular epiphytes in two contrasting Central Amazonian floodplain ecosystems                                  | Acta Botanica Brasilica | Brasil  |
| 9  | Amazonia | Costa & Pietrobom2010 | 2010 | Jeferson Miranda Costa & Marcio Roberto Pietrobom                                                                                                | Samambaias e licófitas do Parque Ecológico do Gunma, município de Santa Bárbara do Pará, estado do Pará, Brasil                                         | Rodriguésia             | Brasil  |
| 10 | Amazonia | Obermuller et al.2012 | 2012 | Flávio Amorim Obermuller, Marcos Silveira, Cleber                                                                                                | Epiphytic (including hemiepiphytes) diversity in                                                                                                        | Biodivers Conserv       | Brasil  |

| id | Region   | Source                | Year | Author                                                                                | Title                                                                                                                               | Journal                                                                                                                                                                                                                                               | Country  |
|----|----------|-----------------------|------|---------------------------------------------------------------------------------------|-------------------------------------------------------------------------------------------------------------------------------------|-------------------------------------------------------------------------------------------------------------------------------------------------------------------------------------------------------------------------------------------------------|----------|
|    |          |                       |      | Ibraim Salimon, Douglas C. Daly                                                       | three timber species in the southwestern Amazon, Brazil                                                                             |                                                                                                                                                                                                                                                       |          |
| 11 | Amazonia | Benavides et al.2011  | 2011 | A. M. Benavides, A. VascoJ, A. J. Duque# and J. F. D                                  | Association of vascular epiphytes with landscape units and phorophytes in humid lowland forests of Colomb                           | Journal of Tropical Ecology                                                                                                                                                                                                                           | Colombia |
| 12 | Amazonia | Freitas & Prado2005   | 2005 | Carlos Alberto A. de Freitas e Jefferson Prado                                        | Lista anotada das pteridófitas de florestas inundáveis do alto Rio Negro, Município de Santa Isabel do Rio Negro, AM, Brasil        | Acta Botanica Brasílica                                                                                                                                                                                                                               | Brasil   |
| 13 | Amazonia | Afonso et al.2016     | 2016 | Edgar Augusto Lobato Afonso , Ana Kelly Koch , Jeferson Miranda Costa                 | Flora preliminar de Orchidaceae no município de Abaetetuba, Pará, Brasil                                                            | Biota Amazônia                                                                                                                                                                                                                                        | Brasil   |
| 14 | Amazonia | Quaresma & Jardim2013 | 2013 | Adriano Costa Quaresma, Mário Augusto Gonçalves Jardim                                | Fitossociologia e Distribuição Espacial de Bromélias epifíticas em uma Floresta de Várzea Estuarina Amazônica                       | Revista Brasileira de Biociências                                                                                                                                                                                                                     | Brasil   |
| 15 | Amazonia | Quaresma & Jardim2014 | 2014 | Adriano Costa Quaresma, Mário Augusto Gonçalves Jardim                                | Floristic composition and spatial distribution of vascular epiphytes in the restingas of Maracanã, Brazil                           | Acta Botanica Brasílica                                                                                                                                                                                                                               | Brasil   |
| 16 | Amazonia | Quaresma & Jardim2013 | 2013 | Adriano Costa Quaresma e Mário Augusto Gonçalves Jardim                               | O manejo do açazeiro, Euterpe oleracea Mart., influencia a diversidade de bromélias epifíticas em floresta de várzea?               | Biota Amazônia                                                                                                                                                                                                                                        | Brasil   |
| 17 | Amazonia | Medeiros & Jardim2010 | 2010 | Tonny David Santiago Medeiros e Mário Augusto Gonçalves Jardim                        | Distribuição vertical de orquídeas epifíticas na Área de Proteção Ambiental (APA) Ilha do Combu, Belém, Pará, Brasil                | Revista Brasileira de Biociências                                                                                                                                                                                                                     | Brasil   |
| 18 | Amazonia | Medeiros et al.2013   | 2013 | Tonny David Santiago Medeiros, Mário Augusto Gonçalves Jardim, Adriano Costa Quaresma | Composição florística e estrutura da comunidade de orquídeas epifíticas na APA Ilha do Combu, Pará, Brasil                          | Biota Amazônia                                                                                                                                                                                                                                        | Brasil   |
| 19 | Amazonia | Menezes & Labiak2020  | 2020 | Edson Alves Menezes & Paulo Henrique Labiak                                           | Sinopse de Licófitas e Samambaias do Parque Nacional da Amazônia, Pará, Brasil                                                      | Rodriguésia                                                                                                                                                                                                                                           | Brasil   |
| 20 | Amazonia | Mardegan et al.2011   | 2011 | Sílvia Fernanda Mardegan, Gabriela Bielefeld Nardoto, Niro Hig                        | Variation in nitrogen use strategies and photosynthetic pathways among vascular epiphytes in the Brazilian Central Amazon           | Revista Brasil. Bot                                                                                                                                                                                                                                   | Brasil   |
| 21 | Amazonia | Irume et al.2019      | 2019 | Irume, M.V; Magnusson, W.E, Oliveira, SM.de; ter Steege, H.                           | Composição, padrões de distribuição vertical e formas de vida epifíticas de Philodendron Schott (Araceae Juss.) na Amazônia Central | <a href="https://repositorio.inpa.gov.br/bitstream/1/37327/1/TESE_%20Mariana%20V.%20Irume_%20PPG_BOT_Vers%C3%A3o%20FINAL.pdf">https://repositorio.inpa.gov.br/bitstream/1/37327/1/TESE_%20Mariana%20V.%20Irume_%20PPG_BOT_Vers%C3%A3o%20FINAL.pdf</a> | Brasil   |
| 22 | Amazonia | Koch et al.2013       | 2013 | Ana Kelly Koch, João Ubiratan Moreira dos Santos e Anna Luiza Ilkiu-Borges            | Sinopse das Orchidaceae holoeipifíticas e hemieipifíticas da Floresta Nacional de Caxiuanã, PA, Brasil                              | Hoehnea                                                                                                                                                                                                                                               | Brasil   |

| id | Region   | Source                  | Year | Author                                                                                                         | Title                                                                                                                                                          | Journal                                                 | Country  |
|----|----------|-------------------------|------|----------------------------------------------------------------------------------------------------------------|----------------------------------------------------------------------------------------------------------------------------------------------------------------|---------------------------------------------------------|----------|
| 23 | Amazonia | Koch et al.2015         | 2015 | Ana Kelly Koch, Raquel F. Monteiro & Anna Luiza Ilkiu-Borges                                                   | Checklist de Bromeliaceae da região da Volta Grande do Xingu, Pará, Brasil                                                                                     | Rodriguésia                                             | Brasil   |
| 24 | Amazonia | Benelli et al.2015      | 2015 | Adarilda Petini-Benelli, Célia Regina Araújo Soares-Lopes, Dennis Rodrigues da Silva, Ricardo da Silva Ribeiro | Novos Registros De Epífitas Vasculares Para O Estado De Mato Grosso, Brasil                                                                                    | ENCICLOPÉDIA BIOSFERA                                   | Brasil   |
| 25 | Amazonia | Medeiros2010            | 2010 | Tonny David Santiago Medeiros                                                                                  | Distribuição Vertical De Orquídeas Epífitas E Relação Com Os Forófitos Na Apa Ilha Do Combu, Belém, Pará, Brasil                                               |                                                         | Brasil   |
| 26 | Amazonia | Moreno et al.2003       | 2003 | Luz Amparo Triana - Moreno, Nelson Javier Garzon-Venegas, Jairo Sanchez-Zambrano, O Rlando Vargas              | Epífitas Vasculares Como Indicadores De Regeneración En Bosques Intervenidos De La Amazonía Colombiana                                                         | Acta Biológica Colombiana                               | Colombia |
| 27 | Amazonia | Irume2012               | 2012 | MARIANA VICTÓRIA IRUME                                                                                         | Composição Florística E Distribuição De Epífitas Angiospermas Na Região Do Rio Urucu, Coari- Amazonas                                                          | Acta Amazonica                                          | Brasil   |
| 28 | Amazonia | Sampaio et al.2015      | 2015 | Adeilza Felipe Sampaio, Maria Goreti Coelho de Souza, Marcio Roberto Pietroboim                                | Samambaias e licófitas da Bacia Petrolífera de Urucu, Coari, Amazonas, Brasil                                                                                  | Acta Biológica Catarinense                              | Brasil   |
| 29 | Amazonia | Klein2018               | 2018 | Viviane Pagnussat Klein                                                                                        | Orchidaceae Em Ecosistemas De Campinaranas: Relação Entre Padrões De Distribuição E Composição De Espécies Epífitas Com Características De Aldina Heterophylla | Journal of Ecology                                      | Brasil   |
| 30 | Amazonia | Junior & Jardim2017     | 2017 | Hélio Brito dos Santos Junior e Mário Augusto Gonçalves Jardim                                                 | Epífitas e lianas em palmeiras amazônicas                                                                                                                      | Biota Amazônia                                          | Brasil   |
| 31 | Amazonia | Costal & Pietroboim2007 | 2007 | Jeferson Miranda CostaI, Marcio Roberto Pietroboim                                                             | Pteridófitas (Lycophyta e Monilophyta) da Ilha de Mosqueiro, município de Belém, estado do Pará, Brasil                                                        | Bol. Mus. Para. Emílio Goeldi. Ciências Naturais, Belém | Brasil   |
| 32 | Amazonia | Maciel et al.2007       | 2007 | Sebastião Maciel, Maria Goreti Coelho de Souza, Marcio Roberto Pietroboim                                      | Licófitas e monilófitas do Bosque Rodrigues Alves Jardim Botânico da Amazônia, município de Belém, estado do Pará, Brasil                                      | Bol. Mus. Para. Emílio Goeldi. Ciências Naturais, Belém | Brasil   |
| 33 | Amazonia | Mari et al.2016         | 2016 | Maikel L. G. Mari, Jose J. Toledo, Henrique E. M. Nascimento and Charles E. Zartman                            | Regional and Fine Scale Variation of Holoepiphyte Community Structure in Central Amazonian White-Sand Forests                                                  | BIOTROPICA                                              | Brasil   |
| 34 | Amazonia | Benavides et al.2005    | 2005 | Ana Maria Benavides D., Alvaro J. Duque M., Joost F. Duivenvoorden2, G. Alejandra Vasco And Ricardo Callejas   | A First Quantitative Census Of Vascular Epiphytes In Rain Forests Of Colombian Amazonia                                                                        | Biodiversity and Conservation                           | Colombia |
| 35 | Amazonia | Arevalo & Betancur2004  | 2004 | Rafael Arévalo, Julio Betancur                                                                                 | Diversidad De Epífitas Vasculares En Cuatro Bosques Del Sector Suroriental De La Serranía                                                                      | Caldasia                                                | Colombia |

| id | Region   | Source                | Year | Author                                                                                                             | Title                                                                                                                                                                       | Journal                                                                       | Country   |
|----|----------|-----------------------|------|--------------------------------------------------------------------------------------------------------------------|-----------------------------------------------------------------------------------------------------------------------------------------------------------------------------|-------------------------------------------------------------------------------|-----------|
|    |          |                       |      |                                                                                                                    | De Chiribiquete, Guayana Colombiana                                                                                                                                         |                                                                               |           |
| 36 | Amazonia | Boelter & Zartman2011 | 2011 | Carlos Renato Boelter, Charles Eugene Zartman                                                                      | Associações Entre Epífitas Vasculares E Seus Hospedeiros Em Três Ambientes Florestais Na Amazônia Central, Brasil                                                           |                                                                               | Brasil    |
| 37 | Amazonia | Silva2012             | 2012 | Jefferson José Valsko Da Silva                                                                                     | Distribuição Espacial De Epífitas Vasculares Na Amazônia Central                                                                                                            | Biblioteca Digital de Teses e Dissertações (Universidade Federal do Amazonas) | Brasil    |
| 38 | Amazonia | Suarez & Jauregui2011 | 2011 | Olga Lucia Casanas Suarez1 & Damelis Jauregui                                                                      | Morfoanatomía Foliar De Epífitas Presentes En Un Bosque Nublado, Altos De Pipe, Estado Miranda, Venezuela                                                                   | acta bot. venez                                                               | Venezuela |
| 39 | Amazonia | Mardega2007           | 2007 | Sílvia Fernanda Mardegan                                                                                           | Abundância Natural De 15n Em Solos E Folhas De Áreas De Campina E Campinarana Da Reserva Biológica Da Campina – Inpa, Região De Manaus, Amazonas                            | NA                                                                            | Brasil    |
| 40 | Amazonia | Mari2014              | 2014 | Maikel Lamego Guimarães Mari                                                                                       | Levantamento Florístico E Distribuição Vertical De Epífitas Vasculares Sobre Aldina Heterophylla Spruce Ex Benth                                                            |                                                                               | Brasil    |
| 41 | Amazonia | Junior et al.2020     | 2020 | Wagner Ribeiro da Silva Junior, Alessandro Wagner Coelho Ferreira, Anna Luiza Ilkiu-Borges & Rozijane S. Fernandes | Ferns and lycophytes of remnants in Amazônia Maranhense, Brazil                                                                                                             | Biota Neotropica                                                              | Brasil    |
| 42 | Amazonia | Filho et al.2020      | 2020 | Ricardo Leite Ferreira Filho, Felipe Fajardo Villela Antolin Barberena, And Jeferson Miranda Costa                 | Orchidaceae in floodplains of the islands of Abaetetuba, Amazonian Brazil: a flora threatened by intensive management for açai palm (Euterpe oleracea)                      | BRITTONIA                                                                     | Brasil    |
| 43 | Amazonia | Rodriguez             |      | Lucio Trujillo-Rodriguez, Edith Clemente-Arenas & José J. Toledo.                                                  | Influence of crown structure on distribution and composition of large vascular epiphytes in the extreme northeast Amazonia                                                  | Plant Ecology & Diversity                                                     | Brasil    |
| 44 | Amazonia | Modesto et al.2020    | 2020 | J. S. Modesto; P. W. P. Gomes; A. S. Martins Junior; P. S. MedeirosSarmiento; A. C. C. Tavares-Martins             | The role of palm tree Attalea maripa (Aubl.) Mart. in the fixation of fern communities in edge areas                                                                        | Scientia Plena                                                                | Brasil    |
| 45 | Amazonia | Boelter et al.2013    | 2013 | Carlos R. Boelter, Cristian S. Dambros, Henrique E.M. Nascimento & Charles E. Zartman                              | A tangled web in tropical tree-tops: effects of edaphic variation, neighbourhood phorophyte composition and bark characteristics on epiphytes in a central Amazonian forest | Journal of Vegetation Science                                                 | Brasil    |
| 46 | Amazonia | Quaresma et al.2018   | 2018 | Adriano C. Quaresma, Maria Teresa F. Piedade, Florian Wittmann, Hans ter Steege                                    | Species richness, composition, and spatial distribution of vascular epiphytes in Amazonian black-water floodplain forests                                                   | Biodivers Conserv                                                             | Brasil    |

| <b>id</b> | <b>Region</b>       | <b>Source</b>            | <b>Year</b> | <b>Author</b>                                                                                                                    | <b>Title</b>                                                                                                                                                                                          | <b>Journal</b>                 | <b>Country</b> |
|-----------|---------------------|--------------------------|-------------|----------------------------------------------------------------------------------------------------------------------------------|-------------------------------------------------------------------------------------------------------------------------------------------------------------------------------------------------------|--------------------------------|----------------|
| 1         | Cerrado             | Neto et al.2004          | 2004        | Luiz Menini Neto, Leandro C.S. Assis, Rafaela C. Forzza                                                                          | A família Orchidaceae em um fragmento de floresta estacional semidecidual no município de Barroso, Minas Gerais, Brasil                                                                               | Lundiana                       | Brasil         |
| 2         | Cerrado             | Proença & Sajo2007       | 2007        | Suzana Lúcia Proença e Maria das Graças Sajo                                                                                     | Anatomia foliar de bromélias ocorrentes em áreas de cerrado do Estado de São Paulo, Brasil                                                                                                            | Acta Botanica Brasílica        | Brasil         |
| 3         | Cerrado             | Benelli2012              | 2012        | Adarilda Petini Benelli                                                                                                          | Biogeografia das Orquídeas da Chapada dos Guimarães, Mato Grosso, Brasil.                                                                                                                             | Orquidário                     | Brasil         |
| 4         | Cerrado             | Fabricante et al.2007    | 2007        | Juliano Ricardo Fabricante, Fernanda da Silva Santos, Iara Gonçalves Oliveira, Janaína Cardoso Ferreira, Aline Cristina Michelin | Caracterização florística do componente epifítico vascular ocorrente nas formações florestais da Fazenda Noiva da Colina, município de Borebi (SP)                                                    | Salusvita                      | Brasil         |
| 5         | Cerrado             | Peña-Chocarro et al.1999 | 1999        | Maria del Carmen Peña-Chocarro, Belen Jiménez, Griselda Marin, Sandra Knapp                                                      | Checklist of the pteridophytes of the Mbaracayú Forest Nature Reserve, Paraguay                                                                                                                       |                                | Paraguay       |
| 6         | Cerrado             | Ferreira2011             | 2011        | Mariana Terrôla Martins Ferreira                                                                                                 | Composição florística e distribuição vertical de epífitas vasculares sobre indivíduos de Guapira opposita (Vell.) Reitz (Nyctaginaceae) em um fragmento florestal na Serra da Brígida, Ouro Preto, MG | dissertação                    | Brasil         |
| 7         | Cerrado             | Oliveira2013             | 2013        | Rodolfo de Paula Oliveira                                                                                                        | Comunidades epifítica e arbórea em matas de galeira no Distrito Federal, Brasil                                                                                                                       | dissertação                    | Brasil         |
| 8         | Cerrado             | Lima2014                 | 2014        | José Herlânio de Lima                                                                                                            | Diversidade e riqueza de orquídeas epífitas em Matas de galeria da Floresta Nacional de Brasília-DF                                                                                                   |                                | Brasil         |
| 9         | Cerrado             | Bataghin2017             | 2017        | Fernando Antonio Bataghin, José Salatiel Rodrigues Pires, Fábio de Barros, Adelcio Müller                                        | Epífitas vasculares da Estação Ecológica Barreiro Rico, Anhembi, SP, Brasil: diversidade, abundância e estratificação vertical                                                                        | Hoehnea                        | Brasil         |
| 10        | Cerrado             | Marcusso et al.2016      | 2016        | Gabriel Mendes Marcusso, Ernesto Pedro Dickfelt, José Eduardo de Arruda Bertoni, Reinaldo Monteiro                               | Epífitas vasculares do Parque Estadual de Porto Ferreira, São Paulo, Brasil                                                                                                                           | Revista do Instituto Florestal | Brasil         |
| 11        | Cerrado             | Rossato et al.2008       | 2008        | Davi Rodrigo Rossato, Maria Teresa Zugliani Toniato e Giselda Durigan                                                            | Flora fanerogâmica não-arbórea do cerrado na Estação Ecológica de Assis, Estado de São Paulo                                                                                                          | Revista Brasil. Bot.           | Brasil         |
| 12        | Cerrado             | Oliveira2021             | 2021        | Rodolfo de Paula Oliveira, Gerhard Zotz, Wolfgang Wanek, Augusto Cesar Franco                                                    | Leaf trait co-variation and trade-offs in gallery forest C3 and CAM epiphytes                                                                                                                         | Biotropica                     | Brasil         |
| 13        | Ecótono de Cerradão | Anjos-Silva2000          | 2000        | Evandson José Anjos-Silva                                                                                                        | Levantamento de orquídeas epífitas em ecótono de cerradão – matas alagáveis (Rio Paraguai, Pantanal de Cáceres, Mato Grosso)                                                                          | Simpósio                       | Brasil         |
| 14        | Cerrado             | Batista & Bianchetti2002 | 2002        | João Aguiar Nogueira Batista, Luciano de Bem Bianchetti                                                                          | Lista atualizada das Orchidaceae do Distrito Federal                                                                                                                                                  | Acta Botânica                  | Brasil         |

| id | Region   | Source                       | Year | Author                                                                                                                                    | Title                                                                                                                         | Journal                                                                     | Country  |
|----|----------|------------------------------|------|-------------------------------------------------------------------------------------------------------------------------------------------|-------------------------------------------------------------------------------------------------------------------------------|-----------------------------------------------------------------------------|----------|
| 15 | Cerrado  | Breier2005                   | 2005 | Tiago Böer Breier                                                                                                                         | O epifitismo vascular em florestas do Sudeste do Brasil                                                                       | dissertação                                                                 | Brasil   |
| 16 | Cerrado  | Ferreira etal.2010           | 2010 | Alessandro Wagner Coelho Ferreira, Maria Inês Salgueiro Lima & Emerson Ricardo Pansarin                                                   | Orchidaceae na região central de São Paulo, Brasil                                                                            | Rodriguésia                                                                 | Brasil   |
| 17 | Cerrado  | Neto etal.2020               | 2020 | Menini Neto, L.; Maradini, A. C.; Moura, F. R.; Lima, P.; Furtado, S. G.                                                                  | Out of the Frying Pan Into the Fire: the Community Structure of Epiphytes in Brazilian Savanna After the Passage of Fire      | Edinburgh Journal of Botany                                                 | Brasil   |
| 18 | Cerrado  | Bataghin etal.2012           | 2012 | Fernando Antonio Bataghin, Adelcio Muller, José Salatiel Rodrigues Pires, Fábio de Barros, Angela Terumi Fushita e Eliziane Carla Scariot | Riqueza e estratificação vertical de epífitas vasculares na Estação Ecológica de Jataí - área de Cerrado no Sudeste do Brasil | Hochnea                                                                     | Brasil   |
| 19 | Cerrado  | Werneck & Espirito-Santo2002 | 2002 | Márcio de Souza Werneck, Mário Marcos do Espírito-Santo                                                                                   | Species diversity and abundance of vascular epiphytes on Vellozia piresiana in Brazil                                         | Biotropica                                                                  | Brasil   |
| 20 | Cerrado  | Alves & Kolbek2009           | 2009 | Ruy José Válka Alves, Jiří Kolbek                                                                                                         | Summit vascular flora of Serra de São José, Minas Gerais, Brazil                                                              | Check List                                                                  | Brasil   |
| 21 | Cerrado  | Peña-chocarro etal.2010      | 2010 | Maria del Carmen Peña-chocarro, Cristina Espada-Mateos, María Vera, Gloria Céspedes, Sandra Knapp                                         | Updated checklist of vascular plants of the Mbaracayú Forest Nature Reserve (Reserva Natural del Bosque Mbaracayú), Paraguay  | Phytotaxa                                                                   | Paraguai |
| 22 | Cerrado  | Alves etal.2008              | 2008 | Ruy José Válka Alves, Jiří Kolbek e Johann Becker                                                                                         | Vascular epiphyte vegetation in rocky savannas of southeastern Brazil                                                         | Nordic Journal of Botany                                                    | Brasil   |
| 23 | Cerrado  | Joanitti etal.2017           | 2017 | Sabrina Anselmo Joanitti, Veridiana De Lara Weiser, Osmar Cavassan e André Luiz Giles                                                     | Vascular epiphytes in a woodland savanna forest in southeastern Brazil                                                        | Journal of the Torrey Botanical Society                                     | Brasil   |
| 24 | Cerrado  | Figueiredo etal.2021         | 2021 | Talita Nunes de Castro Figueiredo, Jorge Luís Sousa Ferreira, Francine Neves Calil, Jácomo Divino Borges e Carlos de Melo e Silva Neto    | Vascular epiphytes in urban trees in Goiânia city, Brazilian Cerrado                                                          | Ecologia e Nutrição Florestal                                               | Brasil   |
| 25 | Cerrado  | Cavassan & Weiser2015        | 2015 | Osmar Cavassan, Veridiana de Lara Weiser                                                                                                  | Vascular flora of the Cerrado of Bauru                                                                                        | Biota Neotropica                                                            | Brasil   |
| 1  | Pantanal | Miranda & Neto2012           | 2012 | Amanda Ferraz de Miranda, Germano Guarim Neto                                                                                             | Angiospermas epífitas do Acuri ( <i>Attalea phalerata</i> (mart. ex spreng.) burret) na Fazenda Pareia – Mato Grosso – Brasil | Flovet                                                                      | Brasil   |
| 2  | Pantanal | Anjos-Silva2000              | 2000 | Evandson José Anjos-Silva                                                                                                                 | Levantamento de orquídeas epífitas em ecótono de cerradão – matas alagáveis (rio Paraguai, Pantanal de Cáceres, Mato Grosso)  | Anais do III Simpósio sobre Recursos Naturais e Socioeconômicos do Pantanal | Brasil   |
| 3  | Pantanal | Macedo etal.2000             | 2000 | Miramy Macedo, Ana Rosa Ferreira, Eunice Pereira Gonçalves                                                                                | Levantamento florístico da família Orchidaceae em uma área de construção da Apm – Manso, Chapada dos Guimarães, Mato Grosso   | Anais do III Simpósio sobre Recursos Naturais e Socioeconômicos             | Brasil   |

| id | Region   | Source                 | Year | Author                                                                                                                                                   | Title                                                                                                                                                   | Journal                           | Country  |
|----|----------|------------------------|------|----------------------------------------------------------------------------------------------------------------------------------------------------------|---------------------------------------------------------------------------------------------------------------------------------------------------------|-----------------------------------|----------|
|    |          |                        |      |                                                                                                                                                          |                                                                                                                                                         | cos do Pantanal                   |          |
| 4  | Pantanal | Assis & Labiak2009     | 2009 | Elton Luis Monteiro Assim, Paulo Henrique Labiak                                                                                                         | Polypodiaceae da borda oeste do Pantanal sul-matogrossense, Brasil                                                                                      | Brazilian Journal of Botany       | Brasil   |
| 5  | Pantanal | Rodriguez etal.2009    | 2009 | Diógenes Parabá Rodriguez, Fábio de Barros, Geraldo Alves Damasceno Junior e Ieda Maria Bortolotto                                                       | Levantamento da família Orchidaceae no Morro Santa Cruz, Municípios de Corumbá e Ladário, Mato Grosso do Sul, Brasil.                                   | Hoehnea                           | Brasil   |
| 6  | Pantanal | Moreira etal.2013      | 2013 | Rogério Pinto de Moura Moreira, Caio Augusto dos Santos Batista, Germano Guarim Neto                                                                     | “Check list” de angiospermas da vegetação marginal da estrada Santo Antônio de Leverger – Mimoso, Pantanal de Mato Grosso                               | Flovet                            | Brasil   |
| 7  | Pantanal | Egea etal.2012         | 2012 | Juana de Egea, Maria del Carmen Peña-Chocarro, Cristina Espada, Sandra Knapp                                                                             | Checklist of vascular plants of the Department of Ñeembucú, Paraguay                                                                                    | PhytoKeys                         | Paraguay |
| 8  | Caatinga | Castro etal.2013       | 2013 | Raphaela Aguiar de Castro, Juliano Ricardo Fabricante e José Alves de Siqueira Filho                                                                     | A importância da palmeira <i>Syagrus coronata</i> (Mart.) Becc. para a conservação da riqueza e diversidade de espécies epífitas vasculares na Caatinga | Revista Árvore                    | Brasil   |
| 9  | Caatinga | Ferreira etal.2015     | 2015 | Jéssica VA Ferreira, Juliano R Fabricante e José A Siqueira Filho                                                                                        | Checklist preliminar de Bromeliaceae do Parque Nacional do Catimbau, Pernambuco, Brasil                                                                 | Natureza on line                  | Brasil   |
| 10 | Caatinga | Oliveira etal.2015     | 2015 | Uldérico Rios Oliveira, Fabio da Silva do Espírito Santo e Ivan André Alvarez                                                                            | Comunidade epifítica de <i>Syagrus coronata</i> (Mart.) Becc. (Arecaceae) em áreas de pastanges na Caatinga, Bahia                                      | Revista Caatinga                  | Brasil   |
| 11 | Caatinga | Santos etal.2016       | 2016 | Francisca Marta Medeiros dos Santos, Eliane Alves Lustosa, Maria Auxiliadora da Silva Ramalho, Rayssa Ferreira de Lima, Emanuel Messias Pereira Fernando | Flora herbácea de uma área de Caatinga no Vale do Pajeú, Itapetim, Pernambuco, Brasil                                                                   | Conimas                           | Brasil   |
| 12 | Caatinga | Lemos & Meguro2009     | 2009 | Jesus Rodrigues Lemos e Marico Meguro                                                                                                                    | Florística e fitogeografia da vegetação decidual da Estação Ecológica de Aiuaba, Ceará, Nordeste do Brasil                                              | Revista Brasileira de Biociências | Brasil   |
| 13 | Caatinga | Mendes2003             | 2003 | Maura Rejano de Araújo                                                                                                                                   | Florística e fitossociologia de um fragmento de Caatinga arbórea, São José do Piauí, Piauí.                                                             |                                   | Brasil   |
| 14 | Caatinga | Vitório etal.2019      | 2019 | Camila Vitório, Lucas Marinho, Grênivel Costa e Lidyanne Aona                                                                                            | Flowering plants of Contendas do Sincorá National Forest (Caatinga, northeastern Brazil)                                                                | Brazilian Journal of Botany       | Brasil   |
| 15 | Caatinga | Silva etal.2013        | 2013 | Ana Cecília da Cruz Silva, Ana Paula do Nascimento Prata and Anabel Aparecida de Mello                                                                   | Flowering plants of the Grota do Angico Natural Monument, Caatinga of Sergipe, Brazil                                                                   |                                   | Brasil   |
| 16 | Caatinga | Rodal & Nascimento2002 | 2002 | Maria Jesus Nogueira Rodal e Ladivania Medeiros do Nascimento                                                                                            | Levantamento florístico da floresta serrana da Reserva Biológica de Serra Negra,                                                                        | Acta bot. bras.                   | Brasil   |

| id | Region    | Source                   | Year | Author                                                                                                                                                                  | Title                                                                                                                                                   | Journal                           | Country   |
|----|-----------|--------------------------|------|-------------------------------------------------------------------------------------------------------------------------------------------------------------------------|---------------------------------------------------------------------------------------------------------------------------------------------------------|-----------------------------------|-----------|
|    |           |                          |      |                                                                                                                                                                         | Microrregião de Itaparica, Pernambuco, Brasil                                                                                                           |                                   |           |
| 17 | Caatinga  | Santos etal.2018         | 2018 | Tamyres Micaely Gomes dos Santos; Luan Pedro da Silva; Thaynara de Sousa Silva e José Iranildo Miranda de Melo                                                          | Síndromes de dispersão de Bromeliaceae em uma área prioritária para a conservação do semiárido brasileiro (Parque Nacional (Parna) do Vale do Catimbau) | Conapesc                          | Brasil    |
| 18 | Caatinga  | Gonçalves etal.2020      | 2020 | Leila J.B. Gonçalves, Edgar E. Santo-Silva, Maria Fabiola Barros , Kátia F. Rito , Inara R. Leal e Marcelo Tabarelli                                                    | The palm <i>Syagrus coronata</i> proliferates and structures vascular epiphyte assemblages in a human-modified landscape of the Caatinga dry forest     | Journal of Tropical Ecology       | Brasil    |
| 19 | Ecótono   | Rebolças2021             | 2021 | Natanael Costa Rebouças, Arnaldo Ferreira da Sila Aivy, Luana Mateus de Sousa, Cícero Luanderson da Silva Alencar, Andrieli Lima da Silva, Maria Iracema Bezerra Loiola | Vascular epiphytes (Spermatophytes) of the Baturité Massif, Ceará, Northeast Brazil                                                                     |                                   | Brasil    |
| 20 | Caatinga  | Carvalho etal.2020       | 2020 | Aurélio José Antunes de Carvalho, Everton Hilo de Souza, Grênivel Mota da Costa, Lidyanne Yuriko Saleme Aona e Ana Cristina Fermio Soares                               | Vascular epiphytes on licuri palms ( <i>Syagrus coronata</i> (Mart.) Becc.) in a toposequence: Caatinga conservation indicator species                  | Brazilian Journal of Botany       | Brasil    |
| 21 | Caatinga  | Mendes & Castro2010      | 2010 | Maura Rejane de Araújo Mendes and Antonio Alberto Jorge Farias Castro                                                                                                   | Vascular flora of semi-arid region, São José do Piauí, state of Piauí, Brazil                                                                           |                                   | Brasil    |
| 1  | Neotropic | Abril & Bucher2009       | 2009 | Abril, A. B., & Bucher, E. H.                                                                                                                                           | A comparison of nutrient sources of the epiphyte <i>Tillandsia capillaris</i> attached to trees and cables in Cordoba, Argentina                        | Journal of Arid Environments      | Argentina |
| 2  | Neotropic | Acebey & Krömer2008      | 2008 | Acebey, A. R., & Krömer, T.                                                                                                                                             | Diversity and distribution of Araceae of the Reserva de la Biosfera Los Tuxtlas, Veracruz, Mexico                                                       | Revista Mexicana De Biodiversidad | Mexico    |
| 3  | Neotropic | Acebey etal.2017a        | 2017 | Acebey, A. R., Krömer, T., & Kessler, M.                                                                                                                                | Species richness and vertical distribution of ferns and lycophytes along an elevational gradient in Los Tuxtlas, Veracruz, Mexico                       | Flora                             | Mexico    |
| 4  | Neotropic | Acebey etal.2015         | 2015 | Acebey, A. R., Krömer, T., Vazquez-Torres, M., & Tejero-Diez, J. D.                                                                                                     | Ferns and lycophytes from the Los Tuxtlas Biosphere Reserve, Veracruz, Mexico                                                                           | Botanical Sciences                | Mexico    |
| 5  | Neotropic | Acebey etal.2017b        | 2017 | Acebey, A. R., Lopez-Acosta, J. C., Tejero-Diez, J. D., & Krömer, T.                                                                                                    | Richness and composition of ferns and lycophytes in three areas of humid montane forest in Los Tuxtlas, Veracruz, Mexico                                | Revista Mexicana De Biodiversidad | Mexico    |
| 6  | Neotropic | Acuna-Tarazona etal.2015 | 2015 | Acuna-Tarazona, M., Toledo-Aceves, T., Flores-Palacios, A., Sosa, V. J., & Martinez, M. L..                                                                             | Post-stripping recolonization of vascular epiphytes in cloud-forest fragments in Mexico                                                                 | Journal of Tropical Ecology       | Mexico    |
| 7  | Neotropic | Andrade2003              | 2003 | Andrade, J. L.                                                                                                                                                          | Dew deposition on epiphytic bromeliad leaves: an important event in a Mexican tropical dry deciduous forest                                             | Journal of Tropical Ecology       | Mexico    |

| id | Region    | Source                    | Year | Author                                                                                                                                                                        | Title                                                                                                                                                                       | Journal                       | Country   |
|----|-----------|---------------------------|------|-------------------------------------------------------------------------------------------------------------------------------------------------------------------------------|-----------------------------------------------------------------------------------------------------------------------------------------------------------------------------|-------------------------------|-----------|
| 8  | Neotropic | Armenta-Montero etal.2015 | 2015 | Armenta-Montero, S., Carvajal-Hernandez, C. I., Ellis, E. A., & Krömer, T.                                                                                                    | Distribution and conservation status of Phlegmariurus (Lycopodiaceae) in the state of Veracruz, Mexico                                                                      | Tropical Conservation Science | Mexico    |
| 9  | Neotropic | Bautista etal.2014        | 2014 | Bautista, L. J., Damon, A., Ochoa-Gaona, S., & Tapia, R. C.                                                                                                                   | Impact of silvicultural methods on vascular epiphytes (ferns, bromeliads and orchids) in a temperate forest in Oaxaca, Mexico                                               | Forest Ecology and Management | Mexico    |
| 10 | Neotropic | Benavides etal.2005       | 2005 | Benavides, A. M., Duque, A. J., Duivenvoorden, J. F., Vasco, G. A., & Callejas, R.                                                                                            | A first quantitative census of vascular epiphytes in rain forests of Colombian Amazonia                                                                                     | Biodiversity and Conservation | Colombia  |
| 11 | Neotropic | Benavides etal.2011       | 2011 | Benavides, A. M., Vasco, A., Duque, A. J., & Duivenvoorden, J. F.                                                                                                             | Association of vascular epiphytes with landscape units and phorophytes in humid lowland forests of Colombian Amazonia                                                       | Journal of Tropical Ecology   | Colombia  |
| 12 | Neotropic | Benavides etal.2013       | 2013 | Benavides, A. M., Wolf, J. H. D., & Duivenvoorden, J. F.                                                                                                                      | Colonization of forest clearings and tree-fall gaps in lowland rain forests of Colombia by hemiepiphytic aroids: experimental and transect studies                          | Journal of Tropical Ecology   | Colombia  |
| 13 | Neotropic | Benavides etal.2006       | 2006 | Benavides, A. M., Wolf, J. H. D., & Duivenvoorden, J. F.                                                                                                                      | Recovery and succession of epiphytes in upper Amazonian fallows                                                                                                             | Journal of Tropical Ecology   | Colombia  |
| 14 | Neotropic | Bermudez etal.2009        | 2009 | Bermudez, G. M., Rodriguez, J. H., & Pignata, M. L.                                                                                                                           | Comparison of the air pollution biomonitoring ability of three Tillandsia species and the lichen Ramalina celastri in Argentina                                             | Environmental Research        | Argentina |
| 15 | Neotropic | Bernal etal.2005          | 2005 | Bernal, R., Valverde, T., & Hernández-Rosas, L.                                                                                                                               | Habitat preference of the epiphyte Tillandsia recurvata (Bromeliaceae) in a semi-desert environment in Central Mexico                                                       | Canadian Journal of Botany    | Mexico    |
| 16 | Neotropic | Bluthgen etal.2000        | 2000 | Bluthgen, N., Verhaagh, M., Goitia, W., Jaffe, K., Morawetz, W., & Barthlott, W.                                                                                              | How plants shape the ant community in the Amazonian rainforest canopy: the key role of extrafloral nectaries and homopteran honeydew                                        | Oecologia                     | Venezuela |
| 17 | Neotropic | Boelter etal.2014         | 2014 | Boelter, C. R., Dambros, C. S., Nascimento, H. E. M., & Zartman, C. E.                                                                                                        | A tangled web in tropical tree-tops: effects of edaphic variation, neighbourhood phorophyte composition and bark characteristics on epiphytes in a central Amazonian forest | Journal of Vegetation Science | Brazil    |
| 18 | Neotropic | Bridgewater etal.2006     | 2006 | Bridgewater, S. G. M., Harris, D. J., Whitefoord, C., Monro, A. K., Penn, M. G., Sutton, D. A., Sayer, B., Adams, B., Balick, M. J., Atha, D. H., Solomon, J., & Holst, B. K. | A Preliminary Checklist of the Vascular Plants of the Chiquibul Forest, Belize                                                                                              | Edinburgh Journal of Botany   | Belize    |
| 19 | Neotropic | Bussmann2001              | 2001 | Bussmann, R. W.                                                                                                                                                               | Epiphyte Diversity in a Tropical Andean Forest - Reserva Biologica San Francisco, Zamora-Chinchipec, Ecuador                                                                | Ecotropica                    | Ecuador   |

| id | Region    | Source                          | Year | Author                                                                                                                                                                                                                                                                                    | Title                                                                                                                                                   | Journal                                          | Country    |
|----|-----------|---------------------------------|------|-------------------------------------------------------------------------------------------------------------------------------------------------------------------------------------------------------------------------------------------------------------------------------------------|---------------------------------------------------------------------------------------------------------------------------------------------------------|--------------------------------------------------|------------|
| 20 | Neotropic | Cardelús2007                    | 2007 | Cardelús, C. L.                                                                                                                                                                                                                                                                           | Vascular epiphyte communities in the inner-crown of <i>Hieronima alchorneoides</i> and <i>Lecythis ampla</i> at La Selva Biological Station, Costa Rica | Biotropica                                       | Costa Rica |
| 21 | Neotropic | Cardelús etal.2006              | 2006 | Cardelús, C. L., Colwell, R. K., & Watkins, J. E.                                                                                                                                                                                                                                         | Vascular epiphyte distribution patterns: explaining the mid-elevation richness peak                                                                     | Journal of Ecology                               | Costa Rica |
| 22 | Neotropic | Carvajal-Hernandez & Krömer2015 | 2015 | Carvajal-Hernandez, C. I., & Krömer, T.                                                                                                                                                                                                                                                   | Richness and Distribution of Ferns and Lycophytes in the Elevational Gradient of the Cofre De Perote, Centre of Veracruz, Mexico                        | Botanical Sciences                               | Mexico     |
| 23 | Neotropic | Carvajal-Hernandez etal.2014    | 2014 | Carvajal-Hernandez, C. I., Krömer, T., & Vazquez-Torres, M. (2014). Species richness and floristic composition of ferns in humid montane forest and associated environments of central Veracruz, Mexico. <i>Revista Mexicana De Biodiversidad</i> , 85(2), 491-501. doi:10.7550/rmb.41292 | Species richness and floristic composition of ferns in humid montane forest and associated environments of central Veracruz, Mexico                     | Revista Mexicana De Biodiversidad                | Mexico     |
| 24 | Neotropic | Cascante-Marin etal.2017        | 2017 | Cascante-Marin, A., Trejos, C., & Alvarado, R.                                                                                                                                                                                                                                            | Association between rainfall seasonality and the flowering of epiphytic plants in a Neotropical montane forest                                          | Biotropica                                       | Costa Rica |
| 25 | Neotropic | Cascante-Marin etal.2008        | 2008 | Cascante-Marín, A., von Meijenfheldt, N., de Leeuw, H. M. H., Wolf, J. H. D., Oostermeijer, J. G. B., & den Nijs, J. C. M.                                                                                                                                                                | Dispersal limitation in epiphytic bromeliad communities in a Costa Rican fragmented montane landscape                                                   | Journal of Tropical Ecology                      | Costa Rica |
| 26 | Neotropic | Cascante-Marin etal.2006        | 2006 | Cascante-Marín, A., Wolf, J. H. D., Oostermeijer, J. G. B., den Nijs, J. C. M., Sanahuja, O., & Durán-Apuy, A.                                                                                                                                                                            | Epiphytic bromeliad communities in secondary and mature forest in a tropical premontane area                                                            | Basic and Applied Ecology                        | Costa Rica |
| 27 | Neotropic | Castillo-Campos etal.2007       | 2007 | Castillo-Campos, G., Davila-Aranda, P., & Zavala-Hurtado, J. A.                                                                                                                                                                                                                           | Tropical dry forest on a lava flow of central Veracruz: checklist of vascular plants                                                                    | Boletin De La Sociedad Botanica De Mexico        | Mexico     |
| 28 | Neotropic | Catchpole2004                   | 2004 | Catchpole, D.                                                                                                                                                                                                                                                                             | The ecology of vascular epiphytes on a <i>Ficus</i> L. host (Moraceae) in a Peruvian cloud forest                                                       | Tesis                                            | Perú       |
| 29 | Neotropic | Ceballos etal.2016              | 2016 | Ceballos, S. J., Chacoff, N. P., & Malizia, A.                                                                                                                                                                                                                                            | Interaction network of vascular epiphytes and trees in a subtropical forest                                                                             | Acta Oecologica-International Journal of Ecology | Argentina  |
| 30 | Neotropic | Ceja-Romero etal.2010           | 2010 | Ceja-Romero, J., Mendoza-Ruiz, A., Lopez-Ferrari, A. R., Espejo-Serna, A., Perez-Garcia, B., & Garcia-Cruz, J.                                                                                                                                                                            | The vascular epiphytic flora of the State of Hidalgo, Mexico diversity and distribution                                                                 | Acta Botanica Mexicana                           | Mexico     |
| 31 | Neotropic | Chaparro & Ticktin2011          | 2011 | Chaparro, D. M., & Ticktin, T.                                                                                                                                                                                                                                                            | Demographic effects of harvesting epiphytic bromeliads and an alternative approach to collection                                                        | Conservation Biology                             | Mexico     |

| id | Region    | Source                        | Year | Author                                                                                                                         | Title                                                                                                                                                                     | Journal                       | Country    |
|----|-----------|-------------------------------|------|--------------------------------------------------------------------------------------------------------------------------------|---------------------------------------------------------------------------------------------------------------------------------------------------------------------------|-------------------------------|------------|
| 32 | Neotropic | Chavez-Sahagun etal.2019      | 2019 | Chavez-Sahagun, E., Andrade, J. L., Zotz, G., & Reyes-Garcia, C.                                                               | Dew Can Prolong Photosynthesis and Water Status During Drought in Some Epiphytic Bromeliads From a Seasonally Dry Tropical Forest                                         | Tropical Conservation Science | Mexico     |
| 33 | Neotropic | De La Rosa-Manzano etal.2014a | 2014 | De La Rosa-Manzano, E., Andrade, J. L., Zotz, G., & Reyes-Garcia, C.                                                           | Physiological responses to drought of five epiphytic orchid species from two tropical dry forests of the Yucatan Peninsula                                                | Botanical Sciences            | Mexico     |
| 34 | Neotropic | De La Rosa-Manzano etal.2014b | 2014 | De la Rosa-Manzano, E., Andrade, J. L., Zotz, G., & Reyes-Garcia, C.                                                           | Epiphytic orchids in tropical dry forests of Yucatan, Mexico - Species occurrence, abundance and correlations with host tree characteristics and environmental conditions | Flora                         | Mexico     |
| 35 | Neotropic | De La Rosa-Manzano etal.2017  | 2017 | De la Rosa-Manzano, E., Guerra-Perez, A., Mendieta-Leiva, G., Mora-Olivo, A., Martinez-Avalos, J. G., & Arellano-Mendez, L. U. | Vascular epiphyte diversity in two forest types of the "El Cielo" Biosphere Reserve, Mexico                                                                               | Botany                        | Mexico     |
| 36 | Neotropic | Dejean etal.2003              | 2003 | Dejean, A., Durou, S., Olmsted, I., Snelling, R. R., & Orivel, J.                                                              | Nest site selection by ants in a flooded Mexican mangrove, with special reference to the epiphytic orchid <i>Myrmecophila christinae</i>                                  | Journal of Tropical Ecology   | Mexico     |
| 37 | Neotropic | Diaz etal.2010                | 2010 | Diaz, I. A., Sieving, K. E., Pena-Foxon, M. E., Larrain, J., & Armesto, J. J.                                                  | Epiphyte diversity and biomass loads of canopy emergent trees in Chilean temperate rain forests: A neglected functional component                                         | Forest Ecology and Management | Chile      |
| 38 | Neotropic | Dunn2000                      | 2000 | Dunn, R. R.                                                                                                                    | Bromeliad Communities in Isolated Trees and Three Successional Stages of an Andean Cloud Forest in Ecuador                                                                | Selbyana                      | Ecuador    |
| 39 | Neotropic | Duran-Fernandez etal.2016     | 2016 | Duran-Fernandez, A., Aguirre-Rivera, J. R., Garcia-Perez, J., Levy-Tacher, S., & de Nova-Vazquez, J. A.                        | Floristic Inventory of the Lacandon Community of Naha, Chiapas, Mexico                                                                                                    | Botanical Sciences            | Mexico     |
| 40 | Neotropic | Einzmann & Zotz2017           | 2017 | Einzmann, H. J. R., & Zotz, G.                                                                                                 | "No signs of saturation": long-term dynamics of vascular epiphyte communities in a human-modified landscape                                                               | Biodiversity and Conservation | Panama     |
| 41 | Neotropic | Feild & Dawson1998            | 1998 | Feild, T. S., & Dawson, T. E.                                                                                                  | Water sources used by <i>Didymopanax pittieru</i> at different life stages in a tropical cloud forest                                                                     | Ecology                       | Costa Rica |
| 42 | Neotropic | Flores-Palacios2016           | 2016 | Flores-Palacios, A.                                                                                                            | Does structural parasitism by epiphytes exist? A case study between <i>Tillandsia recurvata</i> and <i>Parkinsonia praecox</i>                                            | Plant Biology                 | Mexico     |
| 43 | Neotropic | Flores-Palacios etal.2015a    | 2015 | Flores-Palacios, A., Bustamante-Molina, A. B., Corona-Lopez, A. M., & Valencia-Diaz, S.                                        | Seed number, germination and longevity in wild dry forest <i>Tillandsia</i> species of horticultural value                                                                | Scientia Horticulturae        | Mexico     |

| id | Region    | Source                              | Year | Author                                                                                                        | Title                                                                                                                                                      | Journal                                   | Country   |
|----|-----------|-------------------------------------|------|---------------------------------------------------------------------------------------------------------------|------------------------------------------------------------------------------------------------------------------------------------------------------------|-------------------------------------------|-----------|
| 44 | Neotropic | Flores-Palacios & Garcia-Franco2004 | 2004 | Flores-Palacios, A., & Garcia-Franco, J. G.                                                                   | Effect of isolation on the structure and nutrient content of oak epiphyte communities                                                                      | Plant Ecology                             | Mexico    |
| 45 | Neotropic | Flores-Palacios & Garcia-Franco2008 | 2008 | Flores-Palacios, A., & Garcia-Franco, J. G.                                                                   | Habitat isolation changes the beta diversity of the vascular epiphyte community in lower montane forest, Veracruz, Mexico                                  | Biodiversity and Conservation             | Mexico    |
| 46 | Neotropic | Flores-Palacios et al.2015b         | 2015 | Flores-Palacios, A., Garcia-Franco, J. G., & Capistran-Barradas, A.                                           | Biomass, phorophyte specificity and distribution of <i>Tillandsia recurvata</i> in a tropical semi-desert environment (Chihuahuan Desert, Mexico)          | Plant Ecology and Evolution               | Mexico    |
| 47 | Neotropic | Flores-Palacios & Valencia-Diaz2007 | 2007 | Flores-Palacios, A., & Valencia-Diaz, S.                                                                      | Local illegal trade reveals unknown diversity and involves a high species richness of wild vascular epiphytes                                              | Biological Conservation                   | Mexico    |
| 48 | Neotropic | Garcia et al.2008                   | 2008 | García, J. G., Castillo-Campos, G., Mehlreter, K., Martínez, M. L., & Vaazquez, G.                            | Floristic inventory of a cloud forest in the central portion of Veracruz, Mexico                                                                           | Boletin De La Sociedad Botanica De Mexico | Mexico    |
| 49 | Neotropic | Freiberg & Freiberg2000             | 2000 | Freiberg, M., & Freiberg, E.                                                                                  | Epiphyte diversity and biomass in the canopy of lowland and montane forests in Ecuador                                                                     | Journal of Tropical Ecology               | Ecuador   |
| 50 | Neotropic | Zotz et al.2001                     | 2001 | Zotz, G., Thomas V., & Hartung, W.                                                                            | Ecophysiological consequences of differences in plant size: abscisic acid relationships in the epiphytic orchid <i>Dimerandra emarginata</i>               | Oecologia                                 | Panama    |
| 51 | Neotropic | Goldstein2004                       | 2004 | Goldstein, I. R.                                                                                              | Andean Bear use of the epiphytic bromeliad <i>Tillandsia fendleri</i> at Quebrada El Molino, Venezuela                                                     | Ursus                                     | Venezuela |
| 52 | Neotropic | Gonzalez-Astorga et al.2004         | 2004 | Gonzalez-Astorga, J., Cruz-Angon, A., Flores-Palacios, A., & Vovides, A. P.                                   | Diversity and genetic structure of the Mexican endemic epiphyte <i>Tillandsia achyrostachys</i> E. Morr. ex Baker var. <i>achyrostachys</i> (Bromeliaceae) | Annals of Botany                          | Mexico    |
| 53 | Neotropic | Gonzalez-Salvatierra et al.2010     | 2010 | Gonzalez-Salvatierra, C., Luis Andrade, J., Escalante-Erosa, F., Garcia-Sosa, K., & Manuel Pena-Rodriguez, L. | Antioxidant content in two CAM bromeliad species as a response to seasonal light changes in a tropical dry deciduous forest                                | Journal of Plant Physiology               | Mexico    |
| 54 | Neotropic | Goode & Allen2008                   | 2008 | Goode, L. K., & Allen, M. F.                                                                                  | The impacts of hurricane Wilma on the epiphytes of el Edén Ecological Reserve, Quintana Roo, Mexico                                                        | Journal of the Torrey Botanical Society   | Mexico    |
| 55 | Neotropic | Goode & Allen2009                   | 2009 | Goode, L. K., & Allen, M. F.                                                                                  | Seed germination conditions and implications for establishment of an epiphyte, <i>Aechmea bracteata</i> (Bromeliaceae)                                     | Plant Ecology                             | Mexico    |
| 56 | Neotropic | Goode et al.2010                    | 2010 | Goode, L. K., Erhardt, E. B., Santiago, L. S., & Allen, M. F.                                                 | Carbon stable isotopic composition of soluble sugars in <i>Tillandsia</i> epiphytes                                                                        | Oecologia                                 | Mexico    |

| id | Region    | Source                     | Year | Author                                                                                                  | Title                                                                                                                                         | Journal                       | Country    |
|----|-----------|----------------------------|------|---------------------------------------------------------------------------------------------------------|-----------------------------------------------------------------------------------------------------------------------------------------------|-------------------------------|------------|
|    |           |                            |      |                                                                                                         | varies in response to shifts in habitat                                                                                                       |                               |            |
| 57 | Neotropic | Gotsch et al.2015          | 2015 | Gotsch, S. G., Nadkarni, N., Darby, A., Glunk, A., Dix, M., Davidson, K., & Dawson, T. E.               | Life in the treetops: ecophysiological strategies of canopy epiphytes in a tropical montane cloud forest                                      | Ecological Monographs         | Costa Rica |
| 58 | Neotropic | Graham & Andrade2004       | 2004 | Graham, E. A., & Andrade, J. L.                                                                         | Drought tolerance associated with vertical stratification of two co-occurring epiphytic bromeliads in a tropical dry forest                   | American Journal of Botany    | Mexico     |
| 59 | Neotropic | Haro-Carrion et al.2009    | 2009 | Haro-Carrion, X., Lozada, T., Navarrete, H., de Koning, G. H. J., & Koning, G. H. J. D.                 | Conservation of Vascular Epiphyte Diversity in Shade Cacao Plantations in the Choco Region of Ecuador                                         | Biotropica                    | Ecuador    |
| 60 | Neotropic | Hernandez-Perez et al.2018 | 2018 | Hernandez-Perez, E., Solano, E., & Rios-Gomez, R.                                                       | Host affinity and vertical distribution of epiphytic orchids in a montane cloud forest in southern Mexico                                     | Botanical Sciences            | Mexico     |
| 61 | Neotropic | Hernandez-Rojas et al.2018 | 2018 | Hernandez-Rojas, A., Kessler, M., Krömer, T., Carvajal-Hernandez, C., Weigand, A., & Kluge, J.          | Richness Patterns of Ferns Along an Elevational Gradient in the Sierra de Juarez, Oaxaca, Mexico: a Comparison with Central and South America | American Fern Journal         | Mexico     |
| 62 | Neotropic | Hietz1997                  | 1997 | Hietz, P.                                                                                               | Population dynamics of epiphytes in a Mexican humid montane forest                                                                            | Journal of Ecology            | Mexico     |
| 63 | Neotropic | Hietz2005                  | 2005 | Hietz, P.                                                                                               | Conservation of vascular epiphyte diversity in Mexican coffee plantations                                                                     | Conservation Biology          | Mexico     |
| 64 | Neotropic | Hietz & Hietz-Seifert1995a | 1995 | Hietz, P., & Hietz-Seifert, U.                                                                          | Structure and Ecology of Epiphyte Communities of a Cloud Forest in Central Veracruz, Mexico                                                   | Journal of Vegetation Science | Mexico     |
| 65 | Neotropic | Hietz & Hietz-Seifert1995b | 1995 | Hietz, P., & Hietz-Seifert, U.                                                                          | Composition and Ecology of Vascular Epiphyte Communities Along an Altitudinal Gradient in Central Veracruz, Mexico                            | Journal of Vegetation Science | Mexico     |
| 66 | Neotropic | Hietz & Wanek2008          | 2008 | Hietz, P., & Wanek, W.                                                                                  | Size-Dependent Variation of Carbon and Nitrogen Isotope Abundances in Epiphytic Bromeliads                                                    | Plant Biology                 | Mexico     |
| 67 | Neotropic | Hietz-Seifert et al.1996   | 1996 | Hietz-Seifert, U., Hietz, P., & Guevara, S.                                                             | Epiphyte vegetation and diversity on remnant trees after forest clearance in southern Veracruz, Mexico                                        | Biological Conservation       | Mexico     |
| 68 | Neotropic | Ingram & Nadkarni1993      | 1993 | Ingram, S. W., & Nadkarni, N. M.                                                                        | Composition and Distribution of Epiphytic Organic Matter in a Neotropical Cloud Forest, Costa Rica                                            | Biotropica                    | Costa Rica |
| 69 | Neotropic | Jimenez-Lopez et al.2017   | 2017 | Jimenez-Lopez, D. A., Roblero-Velasco, R. D., Martinez-Melendez, N., Ocampo, G., & Gallardo-Cruz, J. A. | Relationship between phorophyte variables and vascular epiphyte richness in the Pantanos de Centla, Tabasco, Mexico                           | Acta Botanica Mexicana        | Mexico     |
| 70 | Neotropic | Kelly et al.2004           | 2004 | Kelly, D. L., O'Donovan, G., Feehan, J., Murphy, S., Drangeid, S. O., & Marcano-Berti, L.               | The epiphyte communities of a montane rain forest in the Andes of Venezuela: patterns in the distribution of the flora                        | Journal of Tropical Ecology   | Venezuela  |

| id | Region    | Source                | Year | Author                                                          | Title                                                                                                                                             | Journal                       | Country    |
|----|-----------|-----------------------|------|-----------------------------------------------------------------|---------------------------------------------------------------------------------------------------------------------------------------------------|-------------------------------|------------|
| 71 | Neotropic | Kelly etal.1994       | 1994 | Kelly, D. L., Tanner, E. V. J., Lughadha, E. M. N., & Kapos, V. | Floristics and biogeography of a rain forest in the Venezuelan Andes                                                                              | Journal of Biogeography       | Venezuela  |
| 72 | Neotropic | Kessler2000           | 2000 | Kessler, M.                                                     | Elevational gradients in species richness and endemism of selected plant groups in the central Bolivian Andes                                     | Plant Ecology                 | Bolivia    |
| 73 | Neotropic | Kessler2001           | 2001 | Kessler, M.                                                     | Patterns of diversity and range size of selected plant groups along an elevational transect in the Bolivian Andes                                 | Biodiversity and Conservation | Bolivia    |
| 74 | Neotropic | Kessler & Lehnert2009 | 2009 | Kessler, M., & Lehnert, M.                                      | Do ridge habitats contribute to pteridophyte diversity in tropical montane forests? A case study from southeastern Ecuador                        | Journal of Plant Research     | Ecuador    |
| 75 | Neotropic | Kluge etal.2008       | 2008 | Kluge, J., Bach, K., & Kessler, M.                              | Elevational distribution and zonation of tropical pteridophyte assemblages in Costa Rica                                                          | Basic and Applied Ecology     | Costa Rica |
| 76 | Neotropic | Kluge & Kessler2011   | 2011 | Kluge, J., & Kessler, M.                                        | Influence of niche characteristics and forest type on fern species richness, abundance and plant size along an elevational gradient in Costa Rica | Plant Ecology                 | Costa Rica |
| 77 | Neotropic | Köster etal.2013      | 2013 | Köster, N., Kreft, H., Nieder, J., & Barthlott, W.              | Range size and climatic niche correlate with the vulnerability of epiphytes to human land use in the tropics                                      | Journal of Biogeography       | Ecuador    |
| 78 | Neotropic | Köster etal.2009      | 2009 | Köster, N., Friedrich, K., Nieder, J., & Barthlott, W.          | Conservation of epiphyte diversity in an Andean landscape transformed by human land use                                                           | Conservation Biology          | Ecuador    |
| 79 | Neotropic | Köster etal2011       | 2011 | Köster, N., Nieder, J., & Barthlott, W.                         | Effect of Host Tree Traits on Epiphyte Diversity in Natural and Anthropogenic Habitats in Ecuador                                                 | Biotropica                    | Ecuador    |
| 80 | Neotropic | Kreft etal.2004       | 2004 | Kreft, H., Köster, N., Kuper, W., Nieder, J., & Barthlott, W.   | Diversity and biogeography of vascular epiphytes in Western Amazonia, Yasuni, Ecuador                                                             | Journal of Biogeography       | Ecuador    |
| 81 | Neotropic | Krömer etal.2013      | 2013 | Krömer, T., Acebey, A., Kluge, J., & Kessler, M.                | Effects of altitude and climate in determining elevational plant species richness patterns: A case study from Los Tuxtlas, Mexico                 | Flora                         | Mexico     |
| 82 | Neotropic | Krömer etal.2006      | 2006 | Krömer, T., Kessler, M., & Gradstein, S. R.                     | Vertical stratification of vascular epiphytes in submontane and montane forest of the Bolivian Andes: the importance of the understory            | Plant Ecology                 | Bolivia    |
| 83 | Neotropic | Larrea & Werner2010   | 2010 | Larrea, M. L., & Werner, F. A.                                  | Response of vascular epiphyte diversity to different land-use intensities in a neotropical montane wet forest                                     | Forest Ecology and Management | Ecuador    |

| id | Region    | Source                      | Year | Author                                                                                                     | Title                                                                                                                                   | Journal                       | Country    |
|----|-----------|-----------------------------|------|------------------------------------------------------------------------------------------------------------|-----------------------------------------------------------------------------------------------------------------------------------------|-------------------------------|------------|
| 84 | Neotropic | Laube & Zotz2006a           | 2006 | Laube, S., & Zotz, G.                                                                                      | Neither host-specific nor random: vascular epiphytes on three tree species in a Panamanian lowland forest                               | Annals of Botany              | Panama     |
| 85 | Neotropic | Laube & Zotz2006b           | 2006 | Laube, S., & Zotz, G.                                                                                      | Long-term changes of the vascular epiphyte assemblage on the palm <i>Socratea exorrhiza</i> in a lowland forest in Panama               | Journal of Vegetation Science | Panama     |
| 86 | Neotropic | Laube & Zotz2007            | 2007 | Laube, S., & Zotz, G.                                                                                      | A metapopulation approach to the analysis of long-term changes in the epiphyte vegetation on the host tree <i>Annona glabra</i>         | Journal of Vegetation Science | Panama     |
| 87 | Neotropic | Leimbeck & Balslev2001      | 2001 | Leimbeck, R. M., & Balslev, H.                                                                             | Species richness and abundance of epiphytic Araceae on adjacent floodplain and upland forest in Amazonian Ecuador                       | Biodiversity and Conservation | Ecuador    |
| 88 | Neotropic | Linares-Palomino etal.2008  | 2008 | Linares-Palomino, R., Cardona, V., Hennig, E. I., Hensen, I., Hoffmann, D., Lenzion, J., . . . Kessler, M. | Non-woody life-form contribution to vascular plant species richness in a tropical American forest                                       | Plant Ecology                 | Bolivia    |
| 89 | Neotropic | Lopez-Villalobos etal.2008  | 2008 | López-Villalobos, A., Flores-Palacios, A., & Ortiz-Pulido, R.                                              | The relationship between bark peeling rate and the distribution and mortality of two epiphyte species                                   | Plant Ecology                 | Mexico     |
| 90 | Neotropic | Maffia etal.1993            | 1993 | Maffia, B., Nadkarni, N. M., & Janos, D. P.                                                                | Vesicular-arbuscular mycorrhizae of epiphytic and terrestrial Piperaceae under field and greenhouse conditions                          | Mycorrhiza                    | Costa Rica |
| 91 | Neotropic | Mandl etal.2010             | 2010 | Mandl, N., Lehnert, M., Kessler, M., & Gradstein, S. R.                                                    | A comparison of alpha and beta diversity patterns of ferns, bryophytes and macrolichens in tropical montane forests of southern Ecuador | Biodiversity and Conservation | Ecuador    |
| 92 | Neotropic | Martinez-Melendez etal.2008 | 2008 | Martinez-Melendez, N., Perez-Farrera, M. A., & Flores-Palacios, A.                                         | Vertical stratification and host preference by vascular epiphytes in a Chiapas, Mexico, cloud forest                                    | Revista De Biología Tropical  | Mexico     |
| 93 | Neotropic | Martinez-Melendez etal.2009 | 2009 | Martinez-Melendez, N., Perez-Farrera, M. A., & Martinez-Camilo, R.                                         | The Vascular Epiphyte Flora of El Triunfo Biosphere Reserve, Chiapas, Mexico                                                            | Rhodora                       | Mexico     |
| 94 | Neotropic | Meave etal.2017             | 2017 | Meave, J. A., Rincon-Gutierrez, A., Ibarra-Manriquez, G., Gallardo-Hernandez, C., & Romero-Romero, M. A.   | Checklist of the vascular flora of a portion of the hyper-humid region of La Chinantla, Northern Oaxaca Range, Mexico                   | Botanical Sciences            | Mexico     |
| 95 | Neotropic | Mehltreter etal.2005        | 2005 | Mehltreter, K., Flores-Palacios, A., & Garcia-Franco, J. G.                                                | Host preferences of low-trunk vascular epiphytes in a cloud forest of Veracruz, Mexico                                                  | Journal of Tropical Ecology   | Mexico     |
| 96 | Neotropic | Mendoza-Ruiz etal.2016      | 2016 | Mendoza-Ruiz, A., Ceja-Romero, J., & Perez-Garcia, B.                                                      | Epiphytic Ferns and Lycophytes of Veracruz, Mexico: Species Richness and Distribution                                                   | Acta Botanica Mexicana        | Mexico     |
| 97 | Neotropic | Mondragón etal.2004a        | 2004 | Mondragón, D., Calvo-Irabién, L. M., & Benzing, D. H.                                                      | The basis for obligate epiphytism in <i>Tillandsia brachycaulos</i> (Bromeliaceae)                                                      | Journal of Tropical Ecology   | Mexico     |

| id  | Region    | Source                    | Year | Author                                                                                                                           | Title                                                                                                                                               | Journal                                  | Country   |
|-----|-----------|---------------------------|------|----------------------------------------------------------------------------------------------------------------------------------|-----------------------------------------------------------------------------------------------------------------------------------------------------|------------------------------------------|-----------|
|     |           |                           |      |                                                                                                                                  | in a Mexican tropical dry forest                                                                                                                    |                                          |           |
| 98  | Neotropic | Mondragon etal.2004b      | 2004 | Mondragón, D., Durn, R., Ramirez, I., & Valverde, T.                                                                             | Temporal variation in the demography of the clonal epiphyte <i>Tillandsia brachycaulos</i> (Bromeliaceae) in the Yucatán Peninsula, Mexico          | Journal of Tropical Ecology              | Mexico    |
| 99  | Neotropic | Mondragón2009             | 2009 | Mondragón, D.                                                                                                                    | Population viability analysis for <i>Guarianthe aurantiaca</i> , an ornamental epiphytic orchid harvested in Southeast México                       | Plant Species Biology                    | Mexico    |
| 100 | Neotropic | Mondragón etal.2009       | 2009 | Mondragón, D., Santos-Moreno, A., & Damon, A.                                                                                    | Epiphyte Diversity on Coffee Bushes: A Management Question?                                                                                         | Journal of Sustainable Agriculture       | Mexico    |
| 101 | Neotropic | Moorhead etal.2010        | 2010 | Moorhead, L. C., Philpott, S. M., & Bichier, P.                                                                                  | Epiphyte biodiversity in the coffee agricultural matrix: canopy stratification and distance from forest fragments                                   | Conservation Biology                     | Mexico    |
| 102 | Neotropic | Mora etal.2006            | 2006 | Mora, M., Bernal, R., Croat, T., & Jácome, J.                                                                                    | A PHYTOGEOGRAPHIC Analysis Of Araceae Of Cabo Corrientes (Chocó, Colombia) And Comparable Lowland Tropical American Floras                          | Annals of the Missouri Botanical Garden  | Colombia  |
| 103 | Neotropic | Morales-Linares etal.2017 | 2017 | Morales-Linares, J., Garcia-Franco, J. G., Flores-Palacios, A., Valenzuela-Gonzalez, J. E., Mata-Rosas, M., & Diaz-Castelazo, C. | Spatial structure of antgardens: vertical distribution on host trees and succession/segregation of associated vascular epiphytes                    | Journal of Vegetation Science            | Mexico    |
| 104 | Neotropic | Nieder etal.2000          | 2000 | Nieder, J., Engwald, S., Klawun, M., & Barthlott, W.                                                                             | Spatial distribution of vascular epiphytes (including hemiepiphytes) in a lowland amazonian rain forest (Surumoni crane plot) of southern Venezuela | Biotropica                               | Venezuela |
| 105 | Neotropic | Nöske etal.2008           | 2008 | Nöske, N. M., Hilt, N., Werner, F. A., Brehm, G., Fiedler, K., Sipman, H. J. M., & Gradstein, S. R.                              | Disturbance effects on diversity of epiphytes and moths in a montane forest in Ecuador                                                              | Basic and Applied Ecology                | Ecuador   |
| 106 | Neotropic | Oldekop etal.2012         | 2012 | Oldekop, J. A., Bebbington, A. J., Truelove, N. K., Tyskland, N., Villamarin, S., & Preziosi, R. F.                              | Co-Occurrence Patterns of Common and Rare Leaf-Litter Frogs, Epiphytic Ferns and Dung Beetles across a Gradient of Human Disturbance                | PLOS ONE                                 | Ecuador   |
| 107 | Neotropic | Ordano & Ornelas2005      | 2005 | Ordano, M., & Ornelas, J. F.                                                                                                     | The cost of nectar replenishment in two epiphytic bromeliads                                                                                        | Journal of Tropical Ecology              | Mexico    |
| 108 | Neotropic | Orozco-Ibarrola etal.2015 | 2015 | Orozco-Ibarrola, O. A., Flores-Hernandez, P. S., Victoriano-Romero, E., Corona-Lopez, A. M., & Flores-Palacios, A.               | Are breeding system and florivory associated with the abundance of <i>Tillandsia</i> species (Bromeliaceae)?                                        | Botanical Journal of the Linnean Society | Mexico    |
| 109 | Neotropic | Petter etal.2015          | 2015 | Petter, G., Wagner, K., Wanek, W., Delgado, E. J. S., Zotz, G., Cabral, J. S., & Kreft, H.                                       | Functional leaf traits of vascular epiphytes: vertical trends within the forest, intra- and interspecific trait variability, and taxonomic signals  | Functional Ecology                       | Panama    |

| id  | Region    | Source                       | Year | Author                                                                    | Title                                                                                                                                                                                                                              | Journal                                     | Country         |
|-----|-----------|------------------------------|------|---------------------------------------------------------------------------|------------------------------------------------------------------------------------------------------------------------------------------------------------------------------------------------------------------------------------|---------------------------------------------|-----------------|
| 110 | Neotropic | Piazzon etal.2011            | 2011 | Piazzon, M., Larrinaga, A. R., & Santamaria, L.                           | Are nested networks more robust to disturbance? A test using epiphyte-tree, comensalistic networks                                                                                                                                 | PLOS ONE                                    | Chile           |
| 111 | Neotropic | Pincheira-Ulbrich etal.2018  | 2018 | Pincheira-Ulbrich, J., Hernandez, C. E., & Saldana, A.                    | Consequences of swamp forest fragmentation on assemblages of vascular epiphytes and climbing plants: Evaluation of the metacommunity structure                                                                                     | Ecology and Evolution                       | Chile           |
| 112 | Neotropic | Rains etal.2003              | 2003 | Rains, K. C., Nadkarni, N. M., & Bledsoe, C. S.                           | Epiphytic and terrestrial mycorrhizas in a lower montane Costa Rican cloud forest                                                                                                                                                  | Mycorrhiza                                  | Costa Rica      |
| 113 | Neotropic | Ramirez-Martinez etal.2018   | 2018 | Ramirez-Martinez, A., Mondragon, D., Valverde, T., & Chavez-Servia, J. L. | Spatial variation in host preference in the endangered epiphytic bromeliad <i>Tillandsia carlos-hankii</i>                                                                                                                         | Oecologica-International Journal of Ecology | Mexico          |
| 114 | Neotropic | Rascher etal.2012            | 2012 | Rascher, U., Freiberg, M., & Luttge, U.                                   | Functional Diversity of Photosynthetic Light Use of 16 Vascular Epiphyte Species Under Fluctuating Irradiance in the Canopy of a Giant <i>Virola michelii</i> (Myristicaceae) Tree in the Tropical Lowland Forest of French Guyana | Frontiers in Plant Science                  | Guyana Francesa |
| 115 | Neotropic | Reid etal.2016               | 2016 | Reid, J. L., Chaves-Fallas, J. M., Holl, K. D., & Zahawi, R. A.           | Tropical forest restoration enriches vascular epiphyte recovery                                                                                                                                                                    | Applied Vegetation Science                  | Costa Rica      |
| 116 | Neotropic | Reina-Rodriguez etal.2016    | 2016 | Reina-Rodriguez, G. A., Rubiano, J. E., Llanos, F. A. C., & Otero, J. T.  | Spatial distribution of dry forest orchids in the Cauca River Valley and Dagua Canyon: Towards a conservation strategy to climate change                                                                                           | Journal for Nature Conservation             | Colombia        |
| 117 | Neotropic | Reyes-Garcia etal.2008a      | 2008 | Reyes-Garcia, C., Griffiths, H., Rincon, E., & Huante, P.                 | Niche differentiation in tank and atmospheric epiphytic bromeliads of a seasonally dry forest                                                                                                                                      | Biotropica                                  | Mexico          |
| 118 | Neotropic | Reyes-Garcia etal.2012       | 2012 | Reyes-Garcia, C., Mejia-Chang, M., & Griffiths, H.                        | High but not dry: diverse epiphytic bromeliad adaptations to exposure within a seasonally dry tropical forest community                                                                                                            | New Phytologist                             | Mexico          |
| 119 | Neotropic | Reyes-Garcia etal.2008b      | 2008 | Reyes-Garcia, C., Mejia-Chang, M., Jones, G. D., & Griffiths, H.          | Water vapour isotopic exchange by epiphytic bromeliads in tropical dry forests reflects niche differentiation and climatic signals                                                                                                 | Plant, Cell & Environment                   | Mexico          |
| 120 | Neotropic | Rojas-Zarate & Mondragon2016 | 2016 | Rojas-Zarate, Y., & Mondragon, D.                                         | Epiphytic bromeliads of the Zaachila district, Oaxaca, Mexico                                                                                                                                                                      | Revista Mexicana De Biodiversidad           | Mexico          |
| 121 | Neotropic | Rudolph etal.1998            | 1998 | Rudolph, D., Rauer, G., Nieder, J., & Barthlott, W.                       | Distributional patterns of epiphytes in the canopy and phorophyte characteristics in a western andean rainforest in Ecuador                                                                                                        | Selbyana                                    | Ecuador         |

| id      | Region    | Source                     | Year | Author                                                                                                      | Title                                                                                                                                                | Journal                                 | Country  |
|---------|-----------|----------------------------|------|-------------------------------------------------------------------------------------------------------------|------------------------------------------------------------------------------------------------------------------------------------------------------|-----------------------------------------|----------|
| 12<br>2 | Neotropic | Ruiz-Cordova<br>etal.2014  | 2014 | Ruiz-Cordova, J. P., Toledo-Hernandez, V. H., & Flores-Palacios, A.                                         | The effect of substrate abundance in the vertical stratification of bromeliad epiphytes in a tropical dry forest (Mexico)                            | Flora                                   | Mexico   |
| 12<br>3 | Neotropic | Salazar<br>etal.2015       | 2015 | Salazar, L., Homeier, J., Kessler, M., Abrahamczyk, S., Lehnert, M., Krömer, T., & Kluge, J.                | Diversity patterns of ferns along elevational gradients in Andean tropical forests                                                                   | Plant Ecology & Diversity               | Ecuador  |
| 12<br>4 | Neotropic | Salinas<br>etal.2010       | 2010 | Salinas, M. F., Arroyo, M. T. K., & Armesto, J. J.                                                          | Epiphytic Growth Habits of Chilean Gesneriaceae And the Evolution of Epiphytes Within the Tribe Coronanthereae                                       | Annals of the Missouri Botanical Garden | Chile    |
| 12<br>5 | Neotropic | Sanchez<br>etal.2016       | 2016 | Sanchez, E. P., Armenteras, D., & Retana, J.                                                                | Edge Influence on Diversity of Orchids in Andean Cloud Forests                                                                                       | Forests                                 | Colombia |
| 12<br>6 | Neotropic | Sayago<br>etal.2013        | 2013 | Sayago, R., Lopezaraiza-Mikel, M., Quesada, M., Alvarez-Anorve, M. Y., Cascante-Marin, A., & Bastida, J. M. | Evaluating factors that predict the structure of a commensalistic epiphyte-<br>phorophyte network                                                    | Proc Biol Sci                           | Mexico   |
| 12<br>7 | Neotropic | Scheffknecht<br>etal.2010  | 2010 | Scheffknecht, S., Winkler, M., Hulber, K., Rosas, M. M., & Hietz, P.                                        | Seedling establishment of epiphytic orchids in forests and coffee plantations in Central Veracruz, Mexico                                            | Journal of Tropical Ecology             | Mexico   |
| 12<br>8 | Neotropic | Scheffknecht<br>etal.2012  | 2012 | Scheffknecht, S., Winkler, M., Mata-Rosas, M., & Hietz, P.                                                  | Survival and Growth of Juvenile Bromeliads in Coffee Plantations and Forests in Central Veracruz, Mexico                                             | Biotropica                              | Mexico   |
| 12<br>9 | Neotropic | Schmidt &<br>Zotz2000      | 2000 | Schmidt, G., & Zotz, G.                                                                                     | Herbivory in the epiphyte, <i>Vriesea sanguinolenta</i> Cogn. & Marchal (Bromeliaceae)                                                               | Journal of Tropical Ecology             | Panama   |
| 13<br>0 | Neotropic | Segovia-Rivas<br>etal.2018 | 2018 | Segovia-Rivas, A., Meave, J. A., Gonzalez, E. J., & Perez-Garcia, E. A.                                     | Experimental reintroduction and host preference of the microendemic and endangered orchid <i>Barkeria whartonia</i> in a Mexican Tropical Dry Forest | Journal for Nature Conservation         | Mexico   |
| 13<br>1 | Neotropic | Solis-Montero<br>etal.2005 | 2005 | Solis-Montero, L., Flores-Palacios, A., & Cruz-Angon, A.                                                    | Shade-coffee plantations as refuges for tropical wild orchids in central Veracruz, Mexico                                                            | Conservation Biology                    | Mexico   |
| 13<br>2 | Neotropic | Suarez<br>etal.2006        | 2006 | Suarez, J. P., Weiss, M., Abele, A., Garnica, S., Oberwinkler, F., & Kottke, I.                             | Diverse tulasnelloid fungi form mycorrhizas with epiphytic orchids in an Andean cloud forest                                                         | Mycological Research                    | Ecuador  |
| 13<br>3 | Neotropic | Susan-Tepetlan<br>etal2015 | 2015 | Susan-Tepetlan, T. M., Velazquez-Rosas, N., & Krömer, T.                                                    | Changes in functional traits of vascular epiphytes of cloud forest and secondary vegetation in central Veracruz, Mexico                              | Botanical Sciences                      | Mexico   |
| 13<br>4 | Neotropic | Suzuki<br>etal.2004        | 2004 | Suzuki, R. M., Kerbauy, G. B., & Zaffari, G. R.                                                             | Endogenous hormonal levels and growth of dark-incubated shoots of <i>Catasetum fimbriatum</i>                                                        | Journal of Plant Physiology             |          |
| 13<br>5 | Neotropic | Taylor<br>etal.2016        | 2016 | Taylor, A., Saldana, A., Zotz, G., Kirby, C., Diaz, I., & Burns, K.                                         | Composition patterns and network structure of epiphyte-host interactions in Chilean and New Zealand temperate forests                                | New Zealand Journal of Botany           | Chile    |

| id  | Region    | Source                                 | Year | Author                                                                                                         | Title                                                                                                                                | Journal                                          | Country     |
|-----|-----------|----------------------------------------|------|----------------------------------------------------------------------------------------------------------------|--------------------------------------------------------------------------------------------------------------------------------------|--------------------------------------------------|-------------|
| 136 | Neotropic | Ticktin etal.2016                      | 2016 | Ticktin, T., Mondragon, D., & Gaoue, O. G.                                                                     | Host genus and rainfall drive the population dynamics of a vascular epiphyte                                                         | Ecosphere                                        | Mexico      |
| 137 | Neotropic | Toledo-Aceves etal.2011                | 2011 | Toledo-Aceves, T., Garcia-Franco, J. G., Hernandez-Rojas, A., & MacMillan, K.                                  | Recolonization of vascular epiphytes in a shaded coffee agroecosystem                                                                | Applied Vegetation Science                       | Mexico      |
| 138 | Neotropic | Toledo-Aceves etal.2012                | 2012 | Toledo-Aceves, T., Garcia-Franco, J. G., Lozada, S. L., Mateos, M. L. L., & MacMillan, K.                      | Germination and seedling survivorship of three Tillandsia species in the cloud-forest canopy                                         | Journal of Tropical Ecology                      |             |
| 139 | Neotropic | Toledo-Aceves etal.2014                | 2014 | Toledo-Aceves, T., Garcia-Franco, J. G., Williams-Linera, G., MacMillan, K., & Gallardo-Hernandez, C.          | Significance of remnant cloud forest fragments as reservoirs of tree and epiphytic bromeliad diversity                               | Tropical Conservation Science                    | Mexico      |
| 140 | Neotropic | Toledo-Aceves & Hernandez-Apolinar2016 | 2016 | Toledo-Aceves, T., & Hernandez-Apolinar, M.                                                                    | Population dynamics of the epiphytic bromeliad Tillandsia butzii in cloud forest.                                                    | Acta Oecologica-International Journal of Ecology | Mexico      |
| 141 | Neotropic | Trapnell & Hamrick2004                 | 2004 | Trapnell, D. W., & Hamrick, J. L.                                                                              | Mating patterns and gene flow in the neotropical epiphytic orchid, Laelia rubescens                                                  | Molecular Ecology                                | Costa Rica  |
| 142 | Neotropic | Tremblay & Castro2009                  | 2009 | Tremblay, R. L., & Castro, J. V.                                                                               | Circular distribution of an epiphytic herb on trees in a subtropical rain forest                                                     | Tropical Ecology                                 | Puerto Rico |
| 143 | Neotropic | Tremblay etal.2006                     | 2006 | Tremblay, R. L., Meléndez-Ackerman, E., & Kapan, D.                                                            | Do epiphytic orchids behave as metapopulations? Evidence from colonization, extinction rates and asynchronous population dynamics    | Biological Conservation                          | Mexico      |
| 144 | Neotropic | Tuomisto etal.2002                     | 2002 | Tuomisto, H., Ruokolainen, K., Poulsen, A. D., Moran, R. C., Quintana, C., Canas, G., & Celi, J.               | Distribution and diversity of pteridophytes and Melastomataceae along edaphic gradients in Yasuni National Park, Ecuadorian Amazonia | Biotropica                                       | Ecuador     |
| 145 | Neotropic | Vale etal.2011                         | 2011 | Vale, A., Rojas, D., Alvarez, J. C., & Navarro, L.                                                             | Breeding system and factors limiting fruit production in the nectarless orchid Broughtonia lindenii                                  | Plant Biology                                    | Havana      |
| 146 | Neotropic | Vazquez & Givnish1998                  | 1998 | Vazquez, J. A., & Givnish, T. J.                                                                               | Altitudinal gradients in tropical forest composition, structure, and diversity in the Sierra de Manantlan                            | Journal of Ecology                               | Mexico      |
| 147 | Neotropic | Vergara-Rodriguez etal.2017            | 2017 | Vergara-Rodriguez, D., Mathieu, G., Samain, M. S., Armenta-Montero, S., & Krömer, T.                           | Diversity, Distribution, and Conservation Status of Peperomia (Piperaceae) in the State of Veracruz, Mexico                          | Tropical Conservation Science                    | Mexico      |
| 148 | Neotropic | Vergara-Torres etal.2018               | 2018 | Vergara-Torres, C. A., Corona-Lopez, A. M., Diaz-Castelazo, C., Toledo-Hernandez, V. H., & Flores-Palacios, A. | Effect of seed removal by ants on the host-epiphyte associations in a tropical dry forest of central Mexico                          | AoB PLANTS                                       | Mexico      |
| 149 | Neotropic | Vergara-Torres etal.2010               | 2010 | Vergara-Torres, C. A., Pacheco-Alvarez, M. C., & Flores-Palacios, A.                                           | Host preference and host limitation of vascular epiphytes in a tropical dry forest of central Mexico                                 | Journal of Tropical Ecology                      | Mexico      |

| id  | Region    | Source                      | Year | Author                                                                                   | Title                                                                                                                                                                     | Journal                                                        | Country    |
|-----|-----------|-----------------------------|------|------------------------------------------------------------------------------------------|---------------------------------------------------------------------------------------------------------------------------------------------------------------------------|----------------------------------------------------------------|------------|
| 150 | Neotropic | Victoriano-Romero etal.2017 | 2017 | Victoriano-Romero, E., Valencia-Diaz, S., Toledo-Hernandez, V. H., & Flores-Palacios, A. | Dispersal limitation of Tillandsia species correlates with rain and host structure in a central Mexican tropical dry forest                                               | PLOS ONE                                                       | Mexico     |
| 151 | Neotropic | Wagner etal.2013            | 2013 | Wagner, K., Bogusch, W., & Zotz, G.                                                      | The role of the regeneration niche for the vertical stratification of vascular epiphytes                                                                                  | Journal of Tropical Ecology                                    | Panama     |
| 152 | Neotropic | Wagner & Zotz2019           | 2019 | Wagner, K., & Zotz, G.                                                                   | Including dynamics in the equation: Tree growth rates and host specificity of vascular epiphytes                                                                          | Journal of Ecology                                             | Panama     |
| 153 | Neotropic | Wanek & Zotz2011            | 2011 | Wanek, W., & Zotz, G.                                                                    | Are vascular epiphytes nitrogen or phosphorus limited? A study of plant (15) N fractionation and foliar N : P stoichiometry with the tank bromeliad Vriesea sanguinolenta | New Phytologist                                                | Panama     |
| 154 | Neotropic | Wania etal.2002             | 2002 | Wania, R., Hietz, P., & Wanek, W.                                                        | Natural N-15 abundance of epiphytes depends on the position within the forest canopy: source signals and isotope fractionation                                            | Plant Cell and Environment                                     | Costa Rica |
| 155 | Neotropic | Watkins etal.2007           | 2007 | Watkins, J. E., Jr., Rundel, P. W., & Cardelus, C. L.                                    | The influence of life form on carbon and nitrogen relationships in tropical rainforest ferns                                                                              | Oecologia                                                      | Costa Rica |
| 156 | Neotropic | Werner & Gradstein2009      | 2009 | Werner, F. A., & Gradstein, R.                                                           | Diversity of dry forest epiphytes across a gradient of human disturbance in the tropical Andes                                                                            | Journal of Vegetation Science                                  | Ecuador    |
| 157 | Neotropic | Werner etal.2005            | 2005 | Werner, F. A., Homeier, J., Gradstein, S. R.                                             | Diversity of vascular epiphytes on isolated remnant trees in the montane forest belt of Southern Ecuador                                                                  | Ecotropica                                                     | Ecuador    |
| 158 | Neotropic | Wester etal.2011            | 2011 | Wester, S., Mendieta-Leiva, G., Nauheimer, L., Wanek, W., Kreft, H., & Zotz, G.          | Physiological diversity and biogeography of vascular epiphytes at Río Changuinola, Panama                                                                                 | Flora - Morphology, Distribution, Functional Ecology of Plants | Panama     |
| 159 | Neotropic | Winkler etal.2005a          | 2005 | Winkler, M., Hulber, K., & Hietz, P.                                                     | Effect of canopy position on germination and seedling survival of epiphytic bromeliads in a Mexican humid montane forest                                                  | Annals of Botany                                               | Mexico     |
| 160 | Neotropic | Winkler etal.2007           | 2007 | Winkler, M., Hülber, K., & Hietz, P.                                                     | Population dynamics of epiphytic bromeliads: Life strategies and the role of host branches                                                                                | Basic and Applied Ecology                                      | Mexico     |
| 161 | Neotropic | Winkler etal.2005b          | 2005 | Winkler, M., Hülber, K., Mehlreter, K., Franco, J. G., & Hietz, P.                       | Herbivory in epiphytic bromeliads, orchids and ferns in a Mexican montane forest                                                                                          | Journal of Tropical Ecology                                    | Mexico     |
| 162 | Neotropic | Wolf2005                    | 2005 | Wolf, J. H. D.                                                                           | The response of epiphytes to anthropogenic disturbance of pine-oak forests in the highlands of Chiapas, Mexico                                                            | Forest Ecology and Management                                  | Mexico     |

| id  | Region    | Source                     | Year | Author                                                    | Title                                                                                                                                                                                   | Journal                     | Country    |
|-----|-----------|----------------------------|------|-----------------------------------------------------------|-----------------------------------------------------------------------------------------------------------------------------------------------------------------------------------------|-----------------------------|------------|
| 163 | Neotropic | Wolf et al.2009            | 2009 | Wolf, J. H. D., Gradstein, S. R., & Nadkarni, N. M.       | A protocol for sampling vascular epiphyte richness and abundance                                                                                                                        | Journal of Tropical Ecology | Mexico     |
| 164 | Neotropic | Woods2017                  | 2017 | Woods, C. L.                                              | Primary ecological succession in vascular epiphytes: The species accumulation model                                                                                                     | Biotropica                  | Costa Rica |
| 165 | Neotropic | Woods et al.2015           | 2015 | Woods, C. L., Cardelús, C. L., DeWalt, S. J., & Piper, F. | Microhabitat associations of vascular epiphytes in a wet tropical forest canopy                                                                                                         | Journal of Ecology          | Costa Rica |
| 166 | Neotropic | Zimmerman & Ehleringer1990 | 1990 | Zimmerman, J. K., & Ehleringer, J. R.                     | Carbon isotope ratios are correlated with irradiance levels in the Panamanian orchid <i>Catasetum viridiflavum</i>                                                                      | Oecologia                   | Panama     |
| 167 | Neotropic | Zimmerman & Olmsted1992    | 1992 | Zimmerman, J. K., & Olmsted, I. C.                        | Host Tree Utilization by Vascular Epiphytes in a Seasonally Inundated Forest (Tintal) in Mexico                                                                                         | Biotropica                  | Mexico     |
| 168 | Neotropic | Zotz2004a                  | 2004 | Zotz, G.                                                  | The resorption of phosphorus is greater than that of nitrogen in senescing leaves of vascular epiphytes from lowland Panama                                                             | Journal of Tropical Ecology | Panama     |
| 169 | Neotropic | Zotz2004b                  | 2004 | Zotz, G.                                                  | How prevalent is crassulacean acid metabolism among vascular epiphytes?                                                                                                                 | Oecologia                   | Panama     |
| 170 | Neotropic | Zotz2007                   | 2007 | Zotz, G.                                                  | The population structure of the vascular epiphytes in a lowland forest in Panama correlates with species abundance                                                                      | Journal of Tropical Ecology | Panama     |
| 171 | Neotropic | Zotz2009                   | 2009 | Zotz, G.                                                  | Growth in the Xerophytic Epiphyte <i>Tillandsia Flexuosa</i> Sw. (Bromeliaceae)                                                                                                         | Ecotropica                  | Panama     |
| 172 | Neotropic | Zotz et al.1999            | 1999 | Zotz, G., Bermejo, P., & Dietz, H.                        | The epiphyte vegetation of <i>Annona glabra</i> on Barro Colorado Island, Panama                                                                                                        | Journal of Biogeography     | Panama     |
| 173 | Neotropic | Zotz & Buche2000           | 2000 | Zotz, G., & Buche, M.                                     | The epiphytic filmy ferns of a tropical lowland forest - species occurrence and habitat preferences                                                                                     | Ecotropica                  | Panama     |
| 174 | Neotropic | Zotz et al.2005            | 2005 | Zotz, G., Laube, S., & Schmidt, G.                        | Long-term population dynamics of the epiphytic bromeliad, <i>Werauhia sanguinolenta</i>                                                                                                 | Ecography                   | Panama     |
| 175 | Neotropic | Zotz et al.2014            | 2014 | Zotz, G., Mendieta-Leiva, G., & Wagner, K.                | Vascular epiphytes at the treeline - composition of species assemblages and population biology                                                                                          | Flora                       | Panama     |
| 176 | Neotropic | Zotz & Reuter2009          | 2009 | Zotz, G., & Reuter, N.                                    | The effect of exposure to sea water on germination and vegetative growth of an epiphytic bromeliad                                                                                      | Journal of Tropical Ecology | Panama     |
| 177 | Neotropic | Zotz & Richter2006         | 2006 | Zotz, G., & Richter, A.                                   | Changes in carbohydrate and nutrient contents throughout a reproductive cycle indicate that phosphorus is a limiting nutrient in the epiphytic bromeliad, <i>Werauhia sanguinolenta</i> | Annals of Botany            | Panama     |

| id  | Region    | Source                           | Year | Author                                                                           | Title                                                                                                                                                              | Journal                                      | Country  |
|-----|-----------|----------------------------------|------|----------------------------------------------------------------------------------|--------------------------------------------------------------------------------------------------------------------------------------------------------------------|----------------------------------------------|----------|
| 178 | Neotropic | Zotz & Schultz2007               | 2007 | Zotz, G., & Schultz, S.                                                          | The vascular epiphytes of a lowland forest in Panama—species composition and spatial structure                                                                     | Plant Ecology                                | Panama   |
| 179 | Neotropic | Zotz & Vollrath2003              | 2003 | Zotz, G., & Vollrath, B.                                                         | The epiphyte vegetation of the palm <i>Socratea exorrhiza</i> - correlations with tree size, tree age and bryophyte cover                                          | Journal of Tropical Ecology                  | Panama   |
| 180 | Neotropic | Acebey & Krömer2001              | 2001 | Acebey, A., & Krömer, T.                                                         | Diversidad y distribución vertical de epífitas en los alrededores del campamento río Eslabón y de la laguna Chahalán Parque Nacional Madidi, Dpto. La Paz, Bolivia | Revista de la Sociedad Boliviana de Botánica | Bolivia  |
| 181 | Neotropic | Acuña2018                        | 2018 | Acuña, S. J.                                                                     | Composición Y Diversidad Florística En Un Área Afectada Por La Erupción Del Volcán Chaitén Luego De Ocho Años, Región De Los Lagos, Chile                          | Tesis Grado                                  | Chile    |
| 182 | Neotropic | Acuña-Tarazona2012               | 2012 | Acuña-Tarazona, M.                                                               | Flora Epífita Vascular Representativa De Bosque Montano Y De Llanura Amazónica Del Parque Nacional Yanachaga Chemillén (Oxapampa, Pasco)                           | Tesis Grado                                  | Perú     |
| 183 | Neotropic | Aguacia Moreno2017               | 2017 | Aguacia Moreno, L. M.                                                            | Análisis De La Distribución, Amenazas Y Usos Actuales De Epifitas Vasculares En El Municipio De Chocontá, Cundinamarca                                             | Tesis                                        | Colombia |
| 184 | Neotropic | Agudelo etal.2019                | 2019 | Agudelo, C. M., Benavides, A. M., Taylor, T., Feeley, K. J., & Duque, A.         | Functional composition of epiphyte communities in the Colombian Andes                                                                                              | Ecology                                      | Colombia |
| 185 | Neotropic | Aguilar-Rodriguez etal.2016      | 2016 | Aguilar-Rodríguez, P. A., Krömer, T., García-Franco, J. G., & MacSwiney G, M. C. | From dusk till dawn: nocturnal and diurnal pollination in the epiphyte <i>Tillandsia heterophylla</i> (Bromeliaceae)                                               | Plant Biology                                | México   |
| 186 | Neotropic | Aguirre etal.2014                | 2014 | Aguirre, Z., Buri, D., Geada, G., & Betancourt, Y.                               | Composición florística, estructura y endemismo en una parcela permanente de bosque seco en Zapotillo, provincia de Loja, Ecuador                                   | Arnaldoa                                     | Ecuador  |
| 187 | Neotropic | Aguirre-Leon1992                 | 1992 | Aguirre-Leon, E.                                                                 | Vascular Epiphytes Of Mexico: A Preliminary Inventory                                                                                                              | Selbyana                                     | México   |
| 188 | Neotropic | Alanis etal.2007                 | 2007 | Alanís, J. L., Muñoz, F. O., López, M., Cuervo, L., & Raya, B.                   | Aportes Al Conocimiento De Las Epífitas (Bromeliaceae, Cactaceae Y Orchidaceae) En Dos Tipos De Vegetación Del Municipio De Pánuco, Veracruz, México               | Revista UDO Agrícola                         | México   |
| 189 | Neotropic | Albesiano & Fernandez-Alonso2006 | 2006 | Albesiano, S., & Fernández-Alonso, J. L.                                         | Catalogue Of The Vascular Plants From The Chicamocha River Canyon (Tropical Zone), Boyacá-Santander, Colombia. First Part                                          | Caldasía                                     | Colombia |

| id  | Region    | Source                           | Year | Author                                                                                                                                           | Title                                                                                                                                            | Journal                                                            | Country   |
|-----|-----------|----------------------------------|------|--------------------------------------------------------------------------------------------------------------------------------------------------|--------------------------------------------------------------------------------------------------------------------------------------------------|--------------------------------------------------------------------|-----------|
| 190 | Neotropic | Alonso etal.2009                 | 2009 | Alonso, S. I., Guma, I. R., Nuciari, M. C., & van Olphen, A.                                                                                     | Flora De Un Área De La Sierra La Barrosa (Balcarce) Y Fenología De Especies Con Potencial Ornamental                                             | Revista de la Facultad de Ciencias Agrarias                        | Argentina |
| 191 | Neotropic | Altamirano etal.2016             | 2016 | Altamirano, S., Fernandez, E., & Turpo, C.                                                                                                       | Vegetación Del Parque Nacional Toro Toro, Bolivia                                                                                                | Kempffiana                                                         | Bolivia   |
| 192 | Neotropic | Alvarado Alvarez2009             | 2009 | Alvarado Álvarez, H.                                                                                                                             | Flora y vegetación ribereña de la cuenca del río Tocuyo, estados Lara y Falcón (Venezuela)                                                       | Tesis Doctor                                                       | Venezuela |
| 193 | Neotropic | Alvarado & Ponce2002             | 2002 | Alvarado, H., & Ponce, M.                                                                                                                        | Composición florística preliminar de una selva estacional de los alrededores de Cuyagua, Parque Nacional Henri Pittier, estado Aragua, Venezuela | Ernstia                                                            | Venezuela |
| 194 | Neotropic | Alvarado Peña & Barreno Coba2010 | 2010 | Alvarado Peña, Z. K., & Barreno Coba, H. V.                                                                                                      | Composición de macroinvertebrados acuáticos en bromelias de un bosque de altura, El Paraíso, Honduras                                            | Tesis                                                              | Honduras  |
| 195 | Neotropic | Alvarado-Fajardo etal.2013       | 2013 | Alvarado-Fajardo, V. M., Morales-Puentes, M. E., & Larrota-Estupiñán, E. F.                                                                      | Bromeliaceae en algunos municipio de Boyacá y Casanare, Colombia                                                                                 | Revista Academica Colombiana de Ciencia                            | Colombia  |
| 196 | Neotropic | Alvarez-Arnesi2017               | 2017 | Alvarez-Arnesi, E.                                                                                                                               | Caracterización de la comunidad de epífitas vasculares en forófitos arbóreos de un quebrachal de la Cuña Boscosa Santafesina                     | Tesis Grado                                                        | Argentina |
| 197 | Neotropic | Alvarez-Arnesi etal.2018         | 2018 | Alvarez-Arnesi, E., Barberis, I. M., & Vesprini, J. L.                                                                                           | Distribución de epífitas vasculares sobre cuatro especies arbóreas en un bosque xerofítico del Chaco Húmedo, Argentina                           | Ecología Austral                                                   | Argentina |
| 198 | Neotropic | Alvarez-Bermeo etal.2019         | 2019 | Alvarez-Bermeo, C., Castaño-R, D., Hoyos, D., Velasco Anacona, G., Peña, J., & Sanín, D. (2019). . , 23(2), 62-94. doi:10.17151/bccm.2019.23.2.3 | Angiospermas No Arbóreas De Un Bosque Húmedo Tropical En El Piedemonte Andino-Amazónico Colombiano                                               | Boletín Científico del Centro de Museos. Museo de Historia Natural | Colombia  |
| 199 | Neotropic | Alvarez-Zuñiga etal.2012         | 2012 | Álvarez-Zúñiga, E., Sánchez-González, A., López-Mata, L., & Tejero-Díez, J. D.                                                                   | Composición y abundancia de las pteridofitas en el bosque mesófilo de montaña del municipio de Tlanchinol, Hidalgo, México                       | Botanical Sciences                                                 | México    |
| 200 | Neotropic | Alzate & Cardona2000             | 2000 | Alzate, F., & Cardona, F.                                                                                                                        | Patrones de distribución de epífitas vasculares en "robledales"                                                                                  | Revista Facultad Nacional de Agronomía Medellín                    | Colombia  |
| 201 | Neotropic | Alzate etal.2001                 | 2001 | Alzate, F., Cardona, F., & Callejas, R.                                                                                                          | Diversidad y composición de epífitas vasculares en robledales de Antioquia (Colombia)                                                            | Actualidades Biológicas                                            | Colombia  |
| 202 | Neotropic | Alzate-Q etal.2019               | 2019 | Alzate-Q, N. F., García-Franco, J. G., Flores-Palacios, A., Krömer, T., & Laborde, J.                                                            | Influence of land use types on the composition and diversity of orchids and their phorophytes in cloud forest fragments                          | Flora                                                              | México    |

| id  | Region    | Source                    | Year | Author                                                                                                                           | Title                                                                                                                                         | Journal                     | Country  |
|-----|-----------|---------------------------|------|----------------------------------------------------------------------------------------------------------------------------------|-----------------------------------------------------------------------------------------------------------------------------------------------|-----------------------------|----------|
| 203 | Neotropic | Andersohn2004             | 2004 | Andersohn, C.                                                                                                                    | Does Tree Height Determine Epiphyte Diversity?                                                                                                | Selbyana                    | México   |
| 204 | Neotropic | Aragon etal.2006          | 2006 | Aragón, S., Rimarachin, L., Ayasta, J., & Woodcock, D.                                                                           | Inventario Preliminar de la Flora del Distrito de Sexi, Cajamarca                                                                             | Arnaldoa                    | Perú     |
| 205 | Neotropic | Araujo-Murakami etal.2011 | 2011 | Araujo-Murakami, A., Cuevas-Echave, R., Miranda, F., Antezana, A., Poma-Chura, A., & Flores, N. (2011). . . 7(2), 3-18.          | Diversidad De Plantas Vasculares En Dos Sitios Del Bosque Yungueño Subandino Pluvial, Apolobamba, Bolivia                                     | Kempffiana                  | Bolivia  |
| 206 | Neotropic | Arevalo2003               | 2003 | Arévalo, R.                                                                                                                      | Composición y distribución de epífitas vasculares en cuatro bosques de la cuenca de Puerto Abeja (Chiribiquete, Amazonia Colombiana)          | Tesis Grado                 | Colombia |
| 207 | Neotropic | Arevalo & Betancur2004    | 2004 | Arévalo, R., & Betancur, J.                                                                                                      | Diversidad de epífitas vasculares en cuatro bosques del sector suroriental de la Serranía de Chiribiquete, Guayana Colombiana                 | Caldasia                    | Colombia |
| 208 | Neotropic | Arias2014                 | 2014 | Arias, R. E.                                                                                                                     | Respuesta a la tala selectiva y cambio climático de epífitas vasculares de sotobosque en un Bosque Nublado al Sur del Ecuador                 | Tesis                       | Ecuador  |
| 209 | Neotropic | Arroyo & Churchill2009    | 2009 | Arroyo, L., & Churchill, S. P.                                                                                                   | Inventarios Botánico del Área de Bella Vista, Departamento de Santa Cruz, Bolivia: Una Base para la Conservación                              | Libro                       | Bolivia  |
| 210 | Neotropic | Avila-Gonzalez etal.2019  | 2019 | Ávila-González, H., González-Gallegos, J. G., López-Enriquez, I. L., Ruacho-González, L., Rubio-Cardoza, J., & Castro-Castro, A. | Inventario de las plantas vasculares y tipos de vegetación del Santuario El Palmito, Sinaloa, México                                          | Botanical Sciences          | México   |
| 211 | Neotropic | Baden etal.2016           | 2016 | Baden, H. M., Särkinen, T., Conde, D. A., Matthews, A. C., Vandrot, H., Chicas, S., . . . Harris, D. J.                          | A Botanical Inventory Of Forest On Karstic Limestone And Metamorphic Substrate In The Chiquibul Forest, Belize, With Focus On Woody Taxa      | Edinburgh Journal of Botany | Belize   |
| 212 | Neotropic | Barba Robert2001          | 2001 | Barba Robert, E.                                                                                                                 | Floritica De La Cuenca Presa Ferreria De Tula Y Zonas Aledañas En El Municipio De Talapa, Mexico                                              | Tesis Grado                 | México   |
| 213 | Neotropic | Barrera T. etal1996       | 1996 | Barrera T., E., Acosta H, N., & Murillo, M. T.                                                                                   | Helechos Y Afines Del Santuario De Fauna Y Flora De Iguaque, Boyacá. Colombia                                                                 | Acta Biológica Colombiana   | Colombia |
| 214 | Neotropic | Barrios2012               | 2012 | Barrios, H                                                                                                                       | Efecto De Las Epifitas En La Diversidad Y La Estructura De La Comunidad De Escarabajos (Insecta: Coleoptera) Del Doseil De Árboles Tropicales | Tecnociencia                | Panamá   |
| 215 | Neotropic | Barrios etal.2006         | 2006 | Barrios, H., Stuntz, S., Simon, U., & Zotz, G.                                                                                   | Fauna de escarabajos (Insecta: Coleoptera) del dosel de árboles tropicales con diferentes especies de epífitas                                | Scientia                    | Panamá   |

| id  | Region    | Source                     | Year | Author                                                                          | Title                                                                                                                                          | Journal                                             | Country     |
|-----|-----------|----------------------------|------|---------------------------------------------------------------------------------|------------------------------------------------------------------------------------------------------------------------------------------------|-----------------------------------------------------|-------------|
| 216 | Neotropic | Barrios-Morales et al.2019 | 2019 | Barrios-Morales, F., Alanís-Méndez, J. L., & Carvajal-Hernández, C. I.          | Diversidad de helechos y licopodios en el área privada de conservación Talhpan, Papantla, Veracruz, México                                     | Polibotánica                                        | México      |
| 217 | Neotropic | Barthlott et al.2001       | 2001 | Barthlott, W., Schmit-Neuerburg, V., Nieder, J., & Engwald, S.                  | Diversity and abundance of vascular epiphytes: a comparison of secondary vegetation and primary montane rain forest in the Venezuelan Andes    | Plant Ecology                                       | Venezuela   |
| 218 | Neotropic | Batke et al.2016           | 2016 | Batke, S., Cascante, A., & Kelly, D.                                            | Epiphytes in Honduras: A geographical analysis of the vascular epiphyte flora and its floristic affinities to other Central American countries | Tropical Ecology                                    | Honduras    |
| 219 | Neotropic | Becerril-Gonzales2012      | 2012 | Becerril-González, M.                                                           | Importancia De La Fauna Asociada A Una Planta Epífita (Tillandsia Polystachia) En Un Bosque Tropical Caducifolio De México                     | Herreriana                                          | México      |
| 220 | Neotropic | Benavente et al.2020       | 2020 | Benavente, L., Ocupa Horna, L., Ugaz, A., Charcape Ravelo, M., & Saldaña, I. S. | Orquídeas CITES del Caserío El Hormiguero, distrito de El Carmen de la Frontera, provincia de Huancabamba, región Piura, Noroeste del Perú     | Arnaldoa                                            | Perú        |
| 221 | Neotropic | Bermudes & Benzing1989     | 1989 | Bermudes, D., & Benzing, D. H.                                                  | Fungi in neotropical epiphyte roots                                                                                                            | Biosystems                                          | Ecuador     |
| 222 | Neotropic | Biener2016                 | 2016 | Biener, M.                                                                      | Hydraulic Traits as Determinants of Epiphyte Distribution in Mid-Elevation Rainforest in Puerto Rico                                           | Tesis                                               | Puerto Rico |
| 223 | Neotropic | Biganzoli & de Romero2004  | 2004 | Biganzoli, F., & De Romero, M. E. M.                                            | Inventario Florístico Del Parque Provincial Teyú Cuaré Y Alrededores (Misiones, Argentina)                                                     | Darwiniana                                          | Argentina   |
| 224 | Neotropic | Bogarín2012                | 2012 | Bogarín, D.                                                                     | A New Telipogon From Mexico Close To Telipogon Standleyi (Orchidaceae: Oncidiinae)                                                             | Lankesteriana International Journal on Orchidology, | México      |
| 225 | Neotropic | Bogarín & Fernandez2010    | 2010 | Bogarín, D., & Fernández, M.                                                    | Lepanthes Arenasiana (Orchidaceae: Pleurothallidinae), A New Species From Costa Rica                                                           | Lankesteriana                                       | Costa Rica  |
| 226 | Neotropic | Bogarín et al.2008         | 2008 | Bogarín, D., Karremans, A. P., & Pupulin, F.                                    | New Species And Records Of Orchidaceae From Costa Rica                                                                                         | Lankesteriana                                       | Costa Rica  |
| 227 | Neotropic | Bogarín & Pupulin2007      | 2007 | Bogarín, D., & Pupulin, F.                                                      | Las Orquídeas Del Parque Nacional Barra Honda, Guanacaste, Costa Rica                                                                          | Lankesteriana International Journal on Orchidology  | Costa Rica  |
| 228 | Neotropic | Bogarín & Pupulin2010      | 2010 | Bogarín, D., & Pupulin, F.                                                      | Two New Species Of Mormolyca From Costa Rica And Panama                                                                                        | Orchid Digest                                       | Costa Rica  |
| 229 | Neotropic | Bøgh1992                   | 1992 | Bøgh, A.                                                                        | Composition And Distribution Of The Vascular Epiphyte Flora Of An Ecuadorian Montane Rain Forest                                               | Selbyana                                            | Ecuador     |

| id  | Region    | Source               | Year | Author                                                                                                  | Title                                                                                                                                                                | Journal                                                         | Country   |
|-----|-----------|----------------------|------|---------------------------------------------------------------------------------------------------------|----------------------------------------------------------------------------------------------------------------------------------------------------------------------|-----------------------------------------------------------------|-----------|
| 230 | Neotropic | Bolaños etal.2010    | 2010 | Bolaños, G., Feuillet, C., Chito, E., Muñoz, E., & Ramírez Padilla, B.                                  | Vegetación, estructura y composición de un área boscosa en el Jardín Botánico "Álvaro José Negret", Vereda La Rejoja, Popayán (Cauca, Colombia)                      | Boletín Científico. Centro de Museos. Museo de Historia Natural | Colombia  |
| 231 | Neotropic | Brown1990            | 1990 | Brown, A. D.                                                                                            | El epifitismo en las selvas montanas del Parque Nacional "El Rey", Argentina: Composición florística y patrón de distribución                                        | Revista De Biología Tropical                                    | Argentina |
| 232 | Neotropic | Bush & Kutz2006      | 2006 | Bush, S. P., & Kutz, W. E.                                                                              | Geographical Variation in the Widespread Temperate Epiphyte, Epidendrum magnoliae Muhlenberg (Orchidaceae)                                                           | Selbyana                                                        | México    |
| 233 | Neotropic | Bussmann etal.2001   | 2001 | Bussmann, R., Werner, F., & Schaaf, A.                                                                  | Epiphyte diversity in a tropical mountain ecosystem - the example of Estación Científica San Francisco, Ecuador                                                      | Libro                                                           | Ecuador   |
| 234 | Neotropic | Cachique2009         | 2009 | Cachique, E. E.                                                                                         | Diversidad de plantas epífitas vasculares en especies arbóreas del Jardín Botánico de la Universidad Nacional Agraria de la Selva, Tingo María - Perú                | Tesis Grado                                                     | Perú      |
| 235 | Neotropic | Cach-Perez2013       | 2013 | Cach-Pérez, M.                                                                                          | Bromeliáceas epífitas de la Península de Yucatán como indicadores de los posibles efectos del cambio climático regional                                              | Tesis                                                           | México    |
| 236 | Neotropic | Cach-Perez etal.2013 | 2013 | Cach-Pérez, M. J., Andrade, J. L., Chilpa-Galván, N., Tamayo-Chim, M., Orellana, R., & Reyes-García, C. | Climatic and Structural Factors Influencing Epiphytic Bromeliad Community Assemblage along a Gradient of Water-Limited Environments in the Yucatan Peninsula, Mexico | Tropical Conservation Science                                   | México    |
| 237 | Neotropic | Cach-Perez etal.2018 | 2018 | Cach-Pérez, M. J., Andrade, J. L., & Reyes-García, C.                                                   | Morphophysiological Plasticity in Epiphytic Bromeliads Across a Precipitation Gradient in the Yucatan Peninsula, Mexico                                              | Tropical Conservation Science                                   | México    |
| 238 | Neotropic | Cagnolo etal.2006    | 2006 | Cagnolo, L., Cabido, M., & Valladares, G.                                                               | Plant species richness in the Chaco Serrano Woodland from central Argentina: Ecological traits and habitat fragmentation effects                                     | Biological Conservation                                         | Argentina |
| 239 | Neotropic | Callañaupa Prado2014 | 2014 | Callañaupa Prado, R                                                                                     | Flora fanerogámica de las cataratas de Batán y Qorimaccma, distrito Los Morochucos, provincia de Cangallo. Ayacucho - 2014                                           | Tesis Grado                                                     | Perú      |
| 240 | Neotropic | Calla-Quevedo2013    | 2013 | Calla-Quevedo, V. L.                                                                                    | Diversidad De Bromeliaceae Y Orchidaceae Epífitas Del Bosque Cachil, La Libertad, Perú, 2009                                                                         | Sagasteguiana                                                   | Perú      |
| 241 | Neotropic | Caluff & Fuentes2008 | 2008 | Caluff, M., & Fuentes, V.                                                                               | Malezas pteridofíticas de Cuba                                                                                                                                       | Revista del Jardín                                              | Cuba      |

| id  | Region    | Source                               | Year | Author                                                                                                 | Title                                                                                                                                                                                                               | Journal                                | Country    |
|-----|-----------|--------------------------------------|------|--------------------------------------------------------------------------------------------------------|---------------------------------------------------------------------------------------------------------------------------------------------------------------------------------------------------------------------|----------------------------------------|------------|
|     |           |                                      |      |                                                                                                        |                                                                                                                                                                                                                     | Botánico Nacional                      |            |
| 242 | Neotropic | Camaparino-Venero etal.2004          | 2004 | Camaparino-Venero, B. d. C., & Castillo-Suárez, A.                                                     | Formas de vida y riqueza de especies vegetales en el Bosque estacional inundable (Igapó Estacional) del Río Sipapo, Estado Amazonas-Venezuela                                                                       | Revista de Investigación               | Venezuela  |
| 243 | Neotropic | Camargo-Espitia etal.2019            | 2019 | Camargo-Espitia, N., Gil-Leguizamón, P. A., & Morales-Puentes, M.                                      | Vegetación de un bosque subandino en Bolívar, Santander-Colombia                                                                                                                                                    | Revista De Biología Tropical           | Colombia   |
| 244 | Neotropic | Carbajal2010                         | 2010 | Carbajal, J. S.                                                                                        | Vegetación del “Corredor Biológico de Uso Múltiple Texiguat”, El Paraíso, Honduras                                                                                                                                  | Tesis                                  | Honduras   |
| 245 | Neotropic | Cardelus2007                         | 2007 | Cardelús, C. L.                                                                                        | Vascular Epiphyte Communities in the Inner-Crown of Hyeronima alchorneoides and Lecythis ampla at La Selva Biological Station, Costa Rica                                                                           | Biotropica                             | Costa Rica |
| 246 | Neotropic | Cardenas2013                         | 2013 | Cárdenas, D. F.                                                                                        | Respuesta de las epífitas vasculares de <i>Nothofagus dombeyi</i> (Nothofagaceae) a la fragmentación del paisaje; propuesta de conservación y educación ambiental en el dosel de bosques urbanos de Valdivia, Chile | Tesis Grado                            | Chile      |
| 247 | Neotropic | Cardenas1992                         | 1992 | Cardenas, O. G.                                                                                        | Distribucion Y Abundancia De Epifitas Y Cavidades En Cuatro Tipos De Vegetacion En La Estacion Cientifica Las Joyas, Reserva De La Biosfera Sierra De Manantlan                                                     | Tesis Grado                            | México     |
| 248 | Neotropic | Carlsen2000                          | 2000 | Carlsen, M.                                                                                            | Structure and Diversity of the Vascular Epiphyte Community in the Overstory of a Tropical Rain Forest in Surumoni, Amazonas State, Venezuela                                                                        | Selbyana                               | Venezuela  |
| 249 | Neotropic | Carmona-Diaz2014                     | 2014 | Carmona-Díaz, G.                                                                                       | Contribución al conocimiento ecológico de la epífita vascular <i>Aechmea bracteata</i> (Bromeliaceae) en el manglar de Sontecomapan, Catemaco, Veracruz, México                                                     | Revista Biológico Agropecuaria Tuxpan  | México     |
| 250 | Neotropic | Carvajal-Hernandez etal.2018         | 2018 | Carvajal-Hernández, C., Silva-Mijangos, L., Kessler, M., & Lehnert, M.                                 | Adiciones a la pteridoflora de Tabasco, México: la importancia del bosque mesófilo de montaña                                                                                                                       | Acta Botanica Mexicana                 | México     |
| 251 | Neotropic | Carvente-Acteopan etal.2017          | 2017 | Carvente-Acteopan, S., Pérez-Olvera, M. A., Flores-Cruz, M., Navarro-Garza, H., & Flores-Hernandez, N. | Diversidad y abundancia de bromelias epifitas en “El Punto” Santa Catarina Ixtepeji, Oaxaca                                                                                                                         | Revista Mexicana de Ciencias Agrícolas | México     |
| 252 | Neotropic | Cascate-Marin & Trejos Hernandez2019 | 2019 | Cascate-Marín, A., & Trejos Hernández, C. (2019). . , 19, 31-55.                                       | Diversidad y vulnerabilidad de la flora orquideológica de un bosque montano nuboso del Valle Central de Costa Rica                                                                                                  | Lankesteriana                          | Costa Rica |

| id  | Region    | Source                      | Year | Author                                                                                                           | Title                                                                                                                                                              | Journal                           | Country    |
|-----|-----------|-----------------------------|------|------------------------------------------------------------------------------------------------------------------|--------------------------------------------------------------------------------------------------------------------------------------------------------------------|-----------------------------------|------------|
| 253 | Neotropic | Castillo-Campos etal.2019   | 2009 | Castillo-Campo, G., Garcia Franco, J. G., Mehlreter, K., & Martinez, M. L.                                       | New records of <i>Ponthieva brenesii</i> (Orchidaceae) y <i>Piper xanthostachyum</i> (Piperaceae) in the State of Veracruz, México                                 | Revista Mexicana De Biodiversidad | México     |
| 254 | Neotropic | Castillo-Campo etal.2007    | 2007 | Castillo-Campos, G., Dávila-Aranda, P., & Zavala-Hurtado, J. A. (2007). . (80), 77-104. doi:10.17129/botsci.1747 | The deciduous forest in a stream of lava in the center of Veracruz: vascular flora flower list                                                                     | Botanical Sciences                | México     |
| 255 | Neotropic | Castro-Hernandez etal.1999  | 1999 | Castro-Hernández, J. C., Wolf, J. H. D., García-Franco, J. G., & González-Espinosa, M.                           | The influence of humidity, nutrients and light on the establishment of the epiphytic bromeliad <i>Tillandsia guatemalensis</i> in the highlands of Chiapas, Mexico | Revista De Biología Tropical      | México     |
| 256 | Neotropic | Catchpole & Kirkpatrick2010 | 2010 | Catchpole, D., & Kirkpatrick, J.                                                                                 | The outstandingly speciose epiphytic flora of a single strangler fig ( <i>Ficus crassiuscula</i> ) in a Peruvian montane cloud forest                              | Capitulo Libro                    | Perú       |
| 257 | Neotropic | Catling1997                 | 1997 | Catling, P. M.                                                                                                   | Influence of Aerial Azteca Nests on the Epiphyte Community of Some Belizean Orange Orchards                                                                        | Biotropica                        | Belize     |
| 258 | Neotropic | Catling & Lefkovitch1989    | 1989 | Catling, P. M., & Lefkovitch, L. P.                                                                              | Associations of Vascular Epiphytes in a Guatemalan Cloud Forest                                                                                                    | Biotropica                        | Gutemala   |
| 259 | Neotropic | Ceballos2019                | 2019 | Ceballos, S. J.                                                                                                  | Dinámica de las comunidades de lianas y epifitas en bosques sucesionales de las yungas australes (Sierra de San Javier, Tucumán, Argentina)                        | Tesis Doctor                      | Argentina  |
| 260 | Neotropic | Ceballos2020                | 2020 | Ceballos, S. J.                                                                                                  | Vascular epiphyte communities in secondary and mature forests of a subtropical montane area                                                                        | Acta Oecologica                   | Argentina  |
| 261 | Neotropic | Cedeño-Fonseca etal.2020    | 2020 | Cedeño-Fonseca, M., Flores-Leitón, J., Quesada-Román, A., & Flores, R.                                           | Inventario florístico en un bosque amenazado por la expansión agrícola en la reserva del Centro Turístico Los Chocuacos, Costa Rica                                | Revista de Ciencias Ambientales   | Costa Rica |
| 262 | Neotropic | Cellini etal.2012           | 2012 | Cellini, J., Salomon, L., & Donadio, S.                                                                          | <i>Tillandsia myosura</i> Griseb. ex Baker (Bromeliaceae), una nueva cita para la flora de la Provincia de Buenos Aires, (Argentina)                               | Bonplandia                        | Argentina  |
| 263 | Neotropic | Cereghino etal.2019         | 2019 | Céréghino, R., Corbara, B., Hénaut, Y., Bonhomme, C., Compin, A., & Dejean, A.                                   | Ant and spider species as surrogates for functional community composition of epiphyte-associated invertebrates in a tropical moist forest                          | Ecological Indicators             | México     |
| 264 | Neotropic | Ceron2001                   | 2001 | Cerón, C. E.                                                                                                     | Diversidad Y Composición Florística En Dos Bosques Nubosos Del Occidente De Pichincha                                                                              | Cinchonia                         | Ecuador    |
| 265 | Neotropic | Ceron2002                   | 2002 | Cerón, C. E.                                                                                                     | Aportes A La Flora Útil De Cerro Blanco Guayas-Ecuador                                                                                                             | Cinchonia                         | Ecuador    |

| id  | Region    | Source                           | Year | Author                                                                                     | Title                                                                                                                                                                 | Journal                                   | Country  |
|-----|-----------|----------------------------------|------|--------------------------------------------------------------------------------------------|-----------------------------------------------------------------------------------------------------------------------------------------------------------------------|-------------------------------------------|----------|
| 266 | Neotropic | Ceron etal.2006a                 | 2006 | Cerón, C. E., Córdova, D. V., & Reyes, C. I.                                               | La Vegetación Y Diversidad Del Bosque Nuboso Entre Sigchos Y Pucayacu, Ecotopaxi-Ecuador                                                                              | Cinchonia                                 | Ecuador  |
| 267 | Neotropic | Ceron & Montalvo2006             | 2006 | Cerón, C. E., & Montalvo, C.                                                               | Aspectos Florísticos, Diversidad Y Ecología Del Parque Nacional Sangay, Ecuador                                                                                       | Cinchonia                                 | Ecuador  |
| 268 | Neotropic | Ceron & Ojeda2006                | 2006 | Cerón, C. E., & Ojeda, I. B.                                                               | Diversidad Florística De Un Bosque Nuboso En Pacto, Pichincha - Ecuador                                                                                               | Cinchonia                                 | Ecuador  |
| 269 | Neotropic | Ceron & Reyes                    | 2009 | Cerón, C. E., & Reyes, C. I.                                                               | Araceae De La Reserva Orquideologica Pahuma, Pichincha - Ecuador                                                                                                      | Cinchonia                                 | Ecuador  |
| 270 | Neotropic | Ceron etal.2006b                 | 2006 | Cerón, C. E., Reyes, C. I., & Gallo, N.                                                    | Remanentes De Bosque Alto Andino En La Cuenca Del Río Apaqui, Carchi - Ecuador                                                                                        | Cinchonia                                 | Ecuador  |
| 271 | Neotropic | Cerros etal.2019                 | 2019 | Cerros, R., Ceja-Romero, J., Mendoza-Ruiz, A., Flores-Morales, A., & Jaramillo-Sánchez, M. | Inventario florístico de los cerros La Cantera y Delgado, Jantetelco, Morelos, México                                                                                 | Acta Botanica Mexicana                    | México   |
| 272 | Neotropic | Cetzal-Ix etal.2013a             | 2013 | Cetzal-Ix, W., Noguera-Savelli, E., Martínez-Icó, M., & Ramírez-Marcial, N.                | Diversidad de helechos y licófitos en fragmentos de selva mediana subperennifolia del sur de Tabasco, México                                                          | Botanical Sciences                        | México   |
| 273 | Neotropic | Cetzal-Ix etal.2013b             | 2013 | Cetzal-Ix, W., Noguera-Savelli, E., & Ramírez-Marcial, N.                                  | Nuevos registros de helechos para Tabasco, México                                                                                                                     | Revista Mexicana De Biodiversidad         | México   |
| 274 | Neotropic | Cevallos & Suarez2017            | 2017 | Cevallos, S., & Suárez, J. P.                                                              | Cambios en la estructura de las comunidades de hongos endófitos asociados a orquideas epífitas comunes en dos bosques montanos aledaños al Parque Nacional Podocarpus | Investiga UTPL                            | Ecuador  |
| 275 | Neotropic | Chambi Pacompia2019              | 2019 | Chambi Pacompia, B. R.                                                                     | Diversidad y composición de pteridofitas en tres formaciones vegetales en el río Los Amigos, Madre de Dios, Amazonía sur Peruana                                      | Q'EUÑA                                    | Perú     |
| 276 | Neotropic | Cogollo & Ramirez1997            | 1997 | Cogollo, A., & Ramírez, J. G.                                                              | Estudio Sobre La Biodiversidad En La Reserva Natural Regional Bajo Cauca - Nechi En El Departamento De Antioquia. Fase I: Inventario Florístico Preliminar            | Informe Tecnico                           | Colombia |
| 277 | Neotropic | Contreras-Leon & Silva-Saenz2020 | 2020 | Contreras-León, J., & Silva-Sáenz, P.                                                      | Inventario Florístico Y Vegetación Del Cráter De La Alberca De Teremendo, Michoacán, México                                                                           | Acta Botanica Mexicana                    | México   |
| 278 | Neotropic | Cornejo-Tenorio etal.2003        | 2003 | Cornejo Tenorio, G., Casas, A., Farfán, B., Villaseñor, J. L., & Ibarra Manríquez, G.      | Flora Y Vegetación De Las Zonas Núcleo De La Reserva De La Biosfera Mariposa Monarca, México                                                                          | Boletin De La Sociedad Botanica De Mexico | México   |
| 279 | Neotropic | Cortes & Rangel2011              | 2011 | Cortés, D., & Rangel-Ch, J. O.                                                             | Estructura Y Aspectos Florísticos De La Vegetación Estuarina En La Bahía De Cispata-Boca Tinajones (Córdoba-Colombia)                                                 | Presentación                              | Colombia |

| id  | Region    | Source                             | Year | Author                                                                                                                                  | Title                                                                                                                                                                       | Journal                           | Country  |
|-----|-----------|------------------------------------|------|-----------------------------------------------------------------------------------------------------------------------------------------|-----------------------------------------------------------------------------------------------------------------------------------------------------------------------------|-----------------------------------|----------|
| 280 | Neotropic | Cortes-Anzures etal.2020           | 2020 | Cortés-Anzúres, B. O., Corona-López, A. M., Damon, A., Mata-Rosas, M., & Flores-Palacios, A.                                            | Phorophyte type determines epiphyte-phorophyte network structure in a Mexican oak forest                                                                                    | Flora                             | México   |
| 281 | Neotropic | Cortes-B etal.1998                 | 1998 | Cortés-B, R., Franco-R, P., & Rangel-Churio, J. O.                                                                                      | La flora vascular de la Sierra de Chiribiquete, Colombia                                                                                                                    | Caldasia                          | Colombia |
| 282 | Neotropic | Croat etal.2006                    | 2006 | Croat, T. B., & Perez-Farrera, M. A.                                                                                                    | A new record of Anthurium sarukhanianum (Araceae) to Chiapas, Mexico-with additional notes on vegetative morphology                                                         | Aroideana                         | México   |
| 283 | Neotropic | Cueva-Reyes & Vega-Gutierrez2012   | 2012 | Cuevas-Reyes, P., & Vega-Gutiérrez, J. I.                                                                                               | Cambios en la estructura, composición y fenología de plantas epífitas bajo diferentes estadios de sucesión vegetal en un bosque tropical seco                               | Biológicas                        | México   |
| 284 | Neotropic | Damian2013a                        | 2013 | Damian, A.                                                                                                                              | Composicion de la familia Orchidaceae en el Sector Setapo de la Reserva Comunal Amarakaeri (Manu- Madre de Dios)                                                            | Tesis Grado                       | Perú     |
| 285 | Neotropic | Damian2013b                        | 2013 | Damian, A.                                                                                                                              | Evaluación preliminar de la familia Orchidaceae en la Reserva Comunal Amarakaeri (Manu-Madre de Dios)                                                                       | Capitulo Libro                    | Perú     |
| 286 | Neotropic | Damian2015                         | 2015 | Damian, A.                                                                                                                              | Distribución Vertical y Horizontal de la familia Orchidaceae en Tres Tipos de Bosques en el sector Paujil, al Interior del Parque Nacional Yanachaga Chemillen (Pasco-Perú) | Q'EUÑA                            | Perú     |
| 287 | Neotropic | David-Higuita & Alvarez-Davila2018 | 2018 | David-Higuita, H., & Álvarez-Dávila, E.                                                                                                 | Riqueza total de especies de plantas vasculares en un bosque andino de la Cordillera central de Colombia                                                                    | Revista De Biología Tropical      | Colombia |
| 288 | Neotropic | Davila & Iberico2016               | 2016 | Dávila, L., & Iberico, G.                                                                                                               | Inventario preliminar de la flora vascular y no vascular del distrito de Chugur, Hualgayoc, endemismos y estado de conservación                                             | Universidad Nacional de Cajamarca | Perú     |
| 289 | Neotropic | de Escobar1989                     | 1989 | de Escobar, L. A.                                                                                                                       | Inventario florístico de un bosque muy húmedo montano bajo en el municipio de Caldas, Antioquia                                                                             | Actualidades Biológicas           | Colombia |
| 290 | Neotropic | de la Rosa-Manzano etal.2019       | 2019 | de la Rosa-Manzano, E., Mendieta-Leiva, G., Guerra-Pérez, A., Aguilar-Dorantes, K. M., Arellano-Méndez, L. U., & Torres-Castillo, J. A. | Vascular Epiphytic Diversity in a Neotropical Transition Zone Is Driven by Environmental and Structural Heterogeneity                                                       | Tropical Conservation Science     | México   |
| 291 | Neotropic | Decker2009                         | 2009 | Decker, M.                                                                                                                              | Diversidad funcional de epífitas en sistemas silvopastoriles como fuente de hábitat para aves en la sub-cuenca del Río Copán, Honduras                                      | Tesis Magister                    | Honduras |
| 292 | Neotropic | Decker etal.2011                   | 2011 | Decker, M., Benjamin, T., Casanoves, F., & DeClerck, F.                                                                                 | Composición y diversidad de epífitas y aves en distintos tipos y densidades de árboles                                                                                      | Agroforestería en las Américas    | Honduras |

| id  | Region    | Source                       | Year | Author                                                                                                                        | Title                                                                                                                                        | Journal                                      | Country   |
|-----|-----------|------------------------------|------|-------------------------------------------------------------------------------------------------------------------------------|----------------------------------------------------------------------------------------------------------------------------------------------|----------------------------------------------|-----------|
|     |           |                              |      |                                                                                                                               | dispersos en sistemas silvopastoriles en la subcuena del río Copán, Honduras                                                                 |                                              |           |
| 293 | Neotropic | Dejean etal.1995             | 1995 | Dejean, A., Olmsted, I., & Snelling, R. R.                                                                                    | Tree-Epiphyte-Ant Relationships in the Low Inundated Forest of Sian Ka'an Biosphere Reserve, Quintana Roo, Mexico                            | Biotropica                                   | México    |
| 294 | Neotropic | De-Nova etal.2019            | 2019 | De-Nova, J. A., González-Trujillo, R., Castillo-Lara, P., Fortanelli-Martínez, J., Mora-Olivo, A., & Salinas-Rodríguez, M. M. | Inventario florístico de la Reserva de la Biosfera Sierra del Abra Tanchipa, San Luis Potosí, México                                         | Botanical Sciences                           | México    |
| 295 | Neotropic | Diaz etal.2012               | 2012 | Díaz, I. A., Marcelo, W., & Peña-Foxon, M.                                                                                    | Epífitas vasculares en el dosel de bosques manejados: un componente importante pero poco conocido de la biodiversidad de los bosques nativos | Informe Tecnico                              | Chile     |
| 296 | Neotropic | Diaz & Delascio-Chitty2007   | 2007 | Díaz P, W. A., & Delascio-Chitty, F.                                                                                          | Catalog of vascular plants of Ciudad Bolívar and its surroundings, Bolívar state, Venezuela                                                  | Acta Botánica Venezuelica                    | Venezuela |
| 297 | Neotropic | Diaz-Alvarez etal.2017       | 2017 | Díaz-Álvarez, E. A., Rojas-Cortés, A. P., & De la Barrera, E.                                                                 | Nocturnal accumulation of titratable acidity in Tillandsia makoyana (Bromeliaceae), epiphytic bromeliad of the tropical dry forest           | Phyton                                       | México    |
| 298 | Neotropic | Diaz-Jimenez2006             | 2006 | Díaz-Jiménez, P.                                                                                                              | Composición florística de la familia Araceae en el desarrollo ecoturístico Kolem jaa' en Tacotalpa, Tabasco, México                          | Kuxulkab'                                    | México    |
| 299 | Neotropic | Dosil Hiriart etal.2018      | 2018 | Dosil Hiriart, F. D., Cabanillas, P. A., Apodaca, M. J., Benedictto, M. N., Barral, L., & Guerrero, E. L.                     | Listado comentado de las plantas vasculares trepadoras y epifitas de la costa rioplatense del Partido de Quilmes (Buenos Aires, Argentina)   | Boletín de la Sociedad Argentina de Botánica | Argentina |
| 300 | Neotropic | de la Rosa-Manzano etal.2017 | 2017 | de la Rosa-Manzano, E., Guerra-Pérez, A., Mendieta-Leiva, G., Mora-Olivo, A., Martínez-Ávalos, J. G., Arellano-Méndez, L. U.  | Vascular epiphyte diversity in two forest types of the "El Cielo" Biosphere Reserve, Mexico                                                  | Botany                                       | México    |
| 301 | Neotropic | Einzmman etal.2015           | 2015 | Einzmman, H. J. R., Beyschlag, J., Hofhansl, F., Wanek, W., & Zotz, G.                                                        | Host tree phenology affects vascular epiphytes at the physiological, demographic and community level                                         | AoB PLANTS                                   | Panamá    |
| 302 | Neotropic | Einzmman etal.2016           | 2016 | Einzmman, H. J. R., Döcke, L., & Zotz, G.                                                                                     | Epiphytes in human settlements in rural Panama                                                                                               | Plant Ecology & Diversity                    | Panamá    |
| 303 | Neotropic | Einzmman & Zotz2016          | 2016 | Einzmman, H. J. R., & Zotz, G.                                                                                                | How Diverse are Epiphyte Assemblages in Plantations and Secondary Forests in Tropical Lowlands?                                              | Tropical Conservation Science                | Panamá    |
| 304 | Neotropic | Encina Dominguez etal.2009   | 2009 | Encina Domínguez, J. A., Zárate Lupercio, A., Estrada Castellón, E., Valdés Reyna, J., & Villarreal Quintanilla, J. A.        | Composición Y Aspectos Estructurales De Los Bosques De Encino De La Sierra De Zapalinamé, Coahuila, México                                   | Acta Botanica Mexicana                       | México    |

| id  | Region    | Source                         | Year | Author                                                                                                                                      | Title                                                                                                                                                                                                | Journal                                   | Country    |
|-----|-----------|--------------------------------|------|---------------------------------------------------------------------------------------------------------------------------------------------|------------------------------------------------------------------------------------------------------------------------------------------------------------------------------------------------------|-------------------------------------------|------------|
| 305 | Neotropic | Endañu-Huerta et al.2017       | 2017 | Endañu-Huerta, E., López-Contreras, J. E., Amador-Del Ángel, L. E., Carnevali, G., Guevara-Carrió, E., Duno De Stefano, R., & Cetzal-Ix, W. | Diversidad De Orquídeas Del Sistema Fluvio Lagunar Deltaico Palizada-Del Este, En El Área De Protección De Flora Y Fauna Laguna De Términos, Campeche, México                                        | Acta Biológica Colombiana                 | México     |
| 306 | Neotropic | Engwald et al.2000             | 2000 | Engwald, S., Schmit-Neuerburg, V., & Barthlott, W.                                                                                          | Epiphytes in rain forests of Venezuela - diversity and dynamics of a biocenosis                                                                                                                      | Capitulo Libro                            | Venezuela  |
| 307 | Neotropic | Escobedo-Sarti & Mondragon2016 | 2016 | Escobedo-Sarti, J., & Mondragón, D.                                                                                                         | Flowering phenology of <i>Catopsis compacta</i> (Bromeliaceae), a dioecious epiphyte in an oak forest                                                                                                | Botanical Sciences                        | México     |
| 308 | Neotropic | Espejo & Ferrari2005           | 2005 | Espejo, A., & Ferrari, A.                                                                                                                   | A new species of <i>Tillandsia</i> (Bromeliaceae) from western Mexico                                                                                                                                | Acta Botánica Mexicana                    | México     |
| 309 | Neotropic | Espinosa2011                   | 2011 | Espinosa, F.                                                                                                                                | Diversidad de epífitas vasculares: Un estudio comparativo del impacto humano en bosques y árboles remanentes en pastizales en dos sitios en bosques nublados del Ecuador                             | Tesis Grado                               | Ecuador    |
| 310 | Neotropic | Espinosa-Jimenez et al.2011    | 2011 | Espinosa-Jiménez, J. A., Pérez-Farrera, M. Á., & Martínez-Camilo, R.                                                                        | Inventario Florístico Del Parque Nacional Cañón Del Sumidero, Chiapas, México                                                                                                                        | Boletin De La Sociedad Botanica De Mexico | México     |
| 311 | Neotropic | Estevez2005                    | 2005 | Estévez, R. E.                                                                                                                              | Inventario De Orquídeas Epífitas Del Bosque Latifoliado Maduro De La Montaña De Linaca, El Paraíso, Honduras.                                                                                        | Tesis Grado                               | Honduras   |
| 312 | Neotropic | Estrada Sanchez2017            | 2017 | Estrada Sánchez, I.                                                                                                                         | Patrones De Distribución De Bromelias Y Orquídeas Epífitas De Los Bosques Mesófilos De Montaña En México Y Sus Relaciones Biogeográficas                                                             | Tesis Magister                            | México     |
| 313 | Neotropic | Estrada2007                    | 2007 | Estrada, Z. E. (2007). (Doctor), Universidad Nacional Mayor de San Marcos, Lima, Perú.                                                      | Análisis e interpretación de diversidad florística en bosques húmedos del Perú, con énfasis al estudio del "Bosque Macuya" del distrito de Irazola, provincia de Padre Abad, Departamento de Ucayali | Tesis Doctor                              | Perú       |
| 314 | Neotropic | Falcon Mendez et al.2015       | 2015 | Falcón Mendez, A., Junco Horta, J. Z., Dominguez Gonzalez, A., Rosete Blandariz, S., & Rosa Angulo, R. (2015). . , 3(1).                    | Flora y vegetación de Lomas de La Canoa, Reserva de la Biosfera Buenavista, Cuba                                                                                                                     | Revista Cubana de Ciencias Forestales     | Cuba       |
| 315 | Neotropic | Fernandez & Bogarín2013        | 2013 | Fernández, M., & Bogarín, D.                                                                                                                | A new species of <i>Trichosalpinx</i> (Orchidaceae: Pleurothallidinae) from Costa Rica                                                                                                               | Brittonia                                 | Costa Rica |
| 316 | Neotropic | Fernandez2015                  | 2015 | Fernández, R.                                                                                                                               | Relación entre la amplitud ecológica de epífitas vasculares y sus respuestas ecofisiológicas a la disponibilidad de luz y humedad, en el Bosque                                                      | Tesis Magister                            | Chile      |

| id  | Region    | Source                                   | Year | Author                                                                                                                          | Title                                                                                                                                                                                    | Journal                                   | Country  |
|-----|-----------|------------------------------------------|------|---------------------------------------------------------------------------------------------------------------------------------|------------------------------------------------------------------------------------------------------------------------------------------------------------------------------------------|-------------------------------------------|----------|
|     |           |                                          |      |                                                                                                                                 | Esclerófilo Mediterráneo Costero                                                                                                                                                         |                                           |          |
| 317 | Neotropic | Fernandez etal.2016                      | 2016 | Fernández, R., Moreno-Chacón, M., Canessa, R., Mardones, D., Viveros, N., & Saldaña, A.                                         | Relación entre la amplitud ecológica de epífitas vasculares y sus respuestas ecofisiológicas a la disponibilidad de luz y humedad en el bosque esclerófilo mediterráneo costero de Chile | Gayana Botánica                           | Chile    |
| 318 | Neotropic | Fernandez-Alonso & Hernandez-Schmidt2007 | 2007 | Fernández-Alonso, J. L., & Hernández-Schmidt, M.                                                                                | Catálogo De La Flora Vascular De La Cuenca Alta Del Río Subachoque (Cundinamarca, Colombia)                                                                                              | Caldasia                                  | Colombia |
| 319 | Neotropic | Fernandez-Rios etal.2014                 | 2014 | Fernández-Ríos, C., Chavez-Servia, J. L., & Mondragon, D.                                                                       | Variación En Número De Óvulos En Flores De Tillandsia Carlos-Hankii Matuda (Bromeliaceae)                                                                                                | Revista Mexicana de Agroecosistemas       | México   |
| 320 | Neotropic | Figueredo Cardona etal.2013              | 2013 | Figueredo Cardona, L. M., Acosta Cantillo, F., Castell Puchades, M. Á., & Polanco Durán, G.                                     | Diversidad Florística De La Comunidad De Verraco, Reserva De La Biosfera Baconao, Cuba                                                                                                   | Foresta Veracruzana                       | Cuba     |
| 321 | Neotropic | Figueroa2007                             | 2007 | Figueroa, J.                                                                                                                    | Variaciones Morfo-Fisiológicas Y Anatómicas En Diferentes Tipos Ecológicos De Orquídeas Epífitas                                                                                         | Tesis Grado                               | Colombia |
| 322 | Neotropic | Figueroa-C & Galeano2007                 | 2007 | Figueroa-C, Y., & Galeano, G.                                                                                                   | Lista Comentada De Las Plantas Vasculares Del Enclave Seco Interandino De La Tatacoa (Huila, Colombia)                                                                                   | Caldasia                                  | Colombia |
| 323 | Neotropic | Flores-Cruz & Diego-Escobar2008          | 2008 | Flores-Cruz, M., & Diego-Escobar, M. V.                                                                                         | Una especie nueva de Tillandsia (Bromeliaceae) de Guerrero, México                                                                                                                       | Boletín De La Sociedad Botánica De México | México   |
| 324 | Neotropic | Flores-Palacios & Garcia-Franco2001      | 2001 | Flores-Palacios, A., & García-Franco, J. G.                                                                                     | Sampling Methods for Vascular Epiphytes: Their Effectiveness in Recording Species Richness and Frequency                                                                                 | Selbyana                                  | México   |
| 325 | Neotropic | Fortanelli-Martinez etal.2014            | 2014 | Fortanelli-Martínez, J., García-Pérez, J., & Castillo-Lara, P.                                                                  | Estructura y composición de la vegetación del bosque de niebla de Copalillos, San Luis Potosí, México                                                                                    | Acta Botanica Mexicana                    | México   |
| 326 | Neotropic | Francisco-de la Cruz etal.2017           | 2017 | Francisco-de la Cruz, A., Villarreal-Quintanilla, J. A., Estrada-Castillón, A. E., & Jasso-Cantú, D. (2017). . . , 121, 83-124. | Flora y vegetación del municipio Alamo Temapache, Veracruz, México                                                                                                                       | Acta Botanica Mexicana                    | México   |
| 327 | Neotropic | Francisco-Ventura2016                    | 2016 | Francisco-Ventura, E.                                                                                                           | Potencial de aprovechamiento de epífitas vasculares caídas en el bosque mesófilo del volcán San Martín Tuxtla, región de Los Tuxtlas, Veracruz, México                                   | Tesis Magister                            | México   |
| 328 | Neotropic | Francisco-Ventura etal.2018              | 2018 | Francisco-Ventura, E., Menchaca-García, R. A., Toledo-Aceves, T., & Krömer, T.                                                  | Potencial de aprovechamiento de epífitas vasculares caídas en un bosque mesófilo de montaña de Los Tuxtlas, Veracruz, México                                                             | Revista Mexicana De Biodiversidad         | México   |

| id  | Region    | Source                            | Year | Author                                                                                            | Title                                                                                                                                                                             | Journal                                      | Country         |
|-----|-----------|-----------------------------------|------|---------------------------------------------------------------------------------------------------|-----------------------------------------------------------------------------------------------------------------------------------------------------------------------------------|----------------------------------------------|-----------------|
| 329 | Neotropic | Frank & Vasquez2010               | 2010 | Frank, R., & Vásquez, D.                                                                          | Monitoreo de herbáceas, trepadoras y epifitas en la zona alta del bosque protector prosperina                                                                                     | Tesis Grado                                  | Ecuador         |
| 330 | Neotropic | Freiberg1996                      | 1996 | Freiberg, M.                                                                                      | Spatial Distribution of Vascular Epiphytes on Three Emergent Canopy Trees in French Guiana                                                                                        | Biotropica                                   | Guyana Francesa |
| 331 | Neotropic | Freiberg & Freiberg2000           | 2000 | Freiberg, M., & Freiberg, E.                                                                      | Epiphyte Diversity and Biomass in the Canopy of Lowland and Montane Forests in Ecuador                                                                                            | Journal of Tropical Ecology                  | Ecuador         |
| 332 | Neotropic | Fuentes2013                       | 2013 | Fuentes, A.                                                                                       | Nuevos registros de la región Madidi (dpto. La Paz), para la flora de plantas vasculares de Bolivia                                                                               | Kempffiana                                   | Bolivia         |
| 333 | Neotropic | Fuentes etal.2009                 | 2009 | Fuentes, A., Miranda Gonzales, T., Araujo-Murakami, A., Cayola, L., Macía, M., & Jørgensen, P.    | Novedades florísticas de la región del Madidi, La Paz-Bolivia                                                                                                                     | Revista de la Sociedad Boliviana de Botánica | Bolivia         |
| 334 | Neotropic | Fuentes2018                       | 2018 | Fuentes, P. A.                                                                                    | Contribución del hábitat epífita a la diversidad de invertebrados edáficos en un bosque esclerófilo costero, Región del Biobío                                                    | Tesis Magister                               | Chile           |
| 335 | Neotropic | Ganem etal.2014                   | 2014 | Ganem, M. A., Arana, M. D., Luna, M. L., Ahumada, O., & Giudice, G. E.                            | Primer Registro De Asplenium Harpeodes (Aspleniaceae) Para La Flora Argentina                                                                                                     | Darwiniana                                   | Argentina       |
| 336 | Neotropic | Garcia2012                        | 2012 | García, N. H.                                                                                     | Preferencia De Hospederos Y Distribución Vertical De Epifitasvasculares En Un Fragmento De Bosque Mesófilo De Montaña De La Reserva De La Biósfera "El Cielo", Tamaulipas, México | Tesis Magister                               | México          |
| 337 | Neotropic | Garcia-Franco1996                 | 1996 | García-Franco, J.                                                                                 | Distribución de epifitas vasculares en matorrales costeros de Veracruz, México                                                                                                    | Acta Botanica Mexicana                       | México          |
| 338 | Neotropic | Garcia-Franco & Toledo-Aceves2008 | 2008 | García-Franco, J. G., & Toledo-Aceves, T.                                                         | Epifitas vasculares (bromelias y orquideas)                                                                                                                                       | Capitulo Libro                               | México          |
| 339 | Neotropic | Garcia-Gonzalez & Marquez2011     | 2011 | García-González, A., & Márquez, R.                                                                | La comunidad orquideológica en la Reserva de la Biosfera Sierra del Rosario, Cuba                                                                                                 | Revista De Biología Tropical                 | Cuba            |
| 340 | Neotropic | Garcia-Gonzales etal.2018         | 2018 | García-González, A., Riverón-Giró, F. B., Damon, A., Raventós, J., & Aguilar-Romero, O.           | Is <i>Oncidium poikilostalix</i> an invasive species? Population ecology and reproductive behavior of this epiphytic orchid in Chiapas, Mexico                                    | Acta Botanica Mexicana                       | México          |
| 341 | Neotropic | Gehrig-Downie2013                 | 2013 | Gehrig-Downie, C.                                                                                 | Epiphyte diversity and microclimate of the tropical lowland cloud forest in French Guiana                                                                                         |                                              | Guyana Francesa |
| 342 | Neotropic | Giorgis etal.2011                 | 2011 | Giorgis, M., Cingolani, A., Chiarini, F., Chiapella, J., Barboza, G., Ariza, L., . . . Cabido, M. | Composición florística del Bosque Chaqueño Serrano de la provincia de Córdoba, Argentina                                                                                          | Kurtziana                                    | Argentina       |

| id  | Region    | Source                         | Year | Author                                                                                                        | Title                                                                                                                                                                             | Journal                              | Country   |
|-----|-----------|--------------------------------|------|---------------------------------------------------------------------------------------------------------------|-----------------------------------------------------------------------------------------------------------------------------------------------------------------------------------|--------------------------------------|-----------|
| 343 | Neotropic | Giraldo-Cañas2001              | 2001 | Giraldo-Cañas, D.                                                                                             | Análisis Florístico Y Fitogeográfico De Un Bosque Secundario Pluvial Andino, Cordillera Central (Antioquia, Colombia)                                                             | Darwiniana                           | Colombia  |
| 344 | Neotropic | Giudice etal.2011              | 2011 | Giudice, G. E., Ramos Giacosa, J. P., Luján Luna, M., Yañez, A., & de la Sota, E. R.                          | Diversidad de helechos y licófitas de la Reserva Natural Punta Lara, Buenos Aires, Argentina                                                                                      | Revista De Biología Tropical         | Argentina |
| 345 | Neotropic | Godoy & Gianoli2013            | 2013 | Godoy, O., & Gianoli, E.                                                                                      | Functional variation of leaf succulence in a cold rainforest epiphyte                                                                                                             | Plant Ecology and Evolution          | Chile     |
| 346 | Neotropic | Gomez Gonzalez etal.2013       | 2017 | Gómez González, D. C., Rodríguez Quiel, C., Zotz, G., & Bader, M. Y.                                          | Species Richness and Biomass of Epiphytic Vegetation in a Tropical Montane Forest in Western Panama                                                                               | Tropical Conservation Science        | Panamá    |
| 347 | Neotropic | Gomez-Escamilla etal.2019      | 2019 | Gomez-Escamilla, I. N., Espejo-Serna, A., López-Ferrari, A. R., & Krömer, T.                                  | Distribución geográfica de angiospermas epífitas de la región terrestre prioritaria Cerros Negro-Yucaño, Oaxaca, México                                                           | Revista De Biología Tropical         | México    |
| 348 | Neotropic | Gomez-Parra etal.2019          | 2019 | Gómez-Parra, R. S., Mendoza-Cifuentes, H., Morales-Puentes, M., Malagón, M., Manrique, N., & Moreno, D.       | Nuevos registros de plantas vasculares para el departamento Boyacá, Colombia                                                                                                      | Acta Botanica Mexicana               | Colombia  |
| 349 | Neotropic | Gomez-Pompa & Valdes1962       | 1962 | Gómez-Pompa, A., & Valdés, J.                                                                                 | Una especie epífita de Yucca de la selva Lacandona                                                                                                                                | Botanical Sciences                   | México    |
| 350 | Neotropic | Gonza2015                      | 2015 | Gonza, F. M.                                                                                                  | Descripción De La Riqueza, Abundancia, Diversidad Especifica Y Distribucion Altitudinal De Especies De Orquideas, En Wiñaywayna-Cusco, 2013-2014                                  | Tesis Grado                          | Perú      |
| 351 | Neotropic | Gonzales Gutierrez etal.2005   | 2005 | Gonzales Gutierrez, P., Suarez Teran, S., Sigarreta Vilches, S., Fernandez Velasquez, A., & Laffita Gámez, O. | Apuntes Sobre La Flora Y La Vegetación Del Sector Costero Bahía De Vita-Pesquero, Rafael Freyre, Holguín                                                                          | Revista del Jardín Botánico Nacional | Cuba      |
| 352 | Neotropic | Gonzales Hernandez etal.2007   | 2007 | Gonzales Hernandez, E., Raventos, J., Mujica Benitez, E., & Bonet, A.                                         | Estructura Y Ecología De La Población Del Endemismo Cubano Broughtonia Cubensis (Orchidaceae), En Cabo San Antonio, Península De Guanahacabibes, Provincia De Pinar Del Río, Cuba | Lankesteriana                        | Cuba      |
| 353 | Neotropic | Gonzalez Gutierrez etal.2006   | 2006 | González Gutiérrez, P., Góngora, J., Leiva, O., Matos, A., & Peña, R.                                         | Apuntes sobre la flora y la vegetación del sector costero Corinthia-Barrederas, Frank País, Holguín                                                                               | Revista del Jardín Botánico Nacional | Cuba      |
| 354 | Neotropic | Gonzalez Gutierrez etal.2020   | 2020 | González Gutiérrez, P., Suárez Terán, S., Almaguer, A. R., & Vega Torres, A.                                  | Vegetación y flora de la localidad Bahía de Cananova-Bahía de Cebollas, Frank País, Holguín                                                                                       | Acta Botanica Cubana                 | Cuba      |
| 355 | Neotropic | Gonzalez-M & Lopez-Camacho2012 | 2012 | González-M, R., & López-Camacho, R.                                                                           | Catálogo De Las Plantas Vasculares De Ráquira (Boyacá), Flora Andina En Un Enclave Seco De Colombia                                                                               | Colombia Forestal                    | Colombia  |

| id  | Region    | Source                            | Year | Author                                                                                                                  | Title                                                                                                                                                                                             | Journal                                     | Country   |
|-----|-----------|-----------------------------------|------|-------------------------------------------------------------------------------------------------------------------------|---------------------------------------------------------------------------------------------------------------------------------------------------------------------------------------------------|---------------------------------------------|-----------|
| 356 | Neotropic | Gonzalez-Suarez etal.2020         | 2020 | González-Suárez, M., Mora-Olivo, A., Villanueva-Gutiérrez, R., Lara-Villalón, M., Vanoye-Eligio, V., & Guerra-Pérez, A. | Diversidad de la flora de interés apícola en el estado de Tamaulipas, México                                                                                                                      | Revista Mexicana de Ciencias Pecuarías      | México    |
| 357 | Neotropic | Goode & Allen2008                 | 2008 | Goode, L. K., & Allen, M. F.                                                                                            | The impacts of Hurricane Wilma on the epiphytes of El Edén Ecological Reserve, Quintana Roo, Mexico                                                                                               | The Journal of the Torrey Botanical Society | México    |
| 358 | Neotropic | Griffiths etal.1989               | 1989 | Griffiths, H., Smith, J. A. C., Lüttge, U., Popp, M., Cram, W. J., Diaz, M., . . . Stimmel, K. H.                       | Ecophysiology of xerophytic and halophytic vegetation of a coastal alluvial plain in northern Venezuela: IV. Tillandsia flexiosa Sw. and Schombürgkia hiemboldtiana Reichb., epiphytic CAM plants | New Phytologist                             | Venezuela |
| 359 | Neotropic | Guerrero Hernandez2012            | 2012 | Guerrero Hernández, R.                                                                                                  | FLORA Y VEGETACION ASOCIADA A Abies Guatemalensis Var. Jaliscana Martinez EN JUANACATLAN, MUNICIPIO DE MASCOTA, JALISCO                                                                           | Tesis Grado                                 | México    |
| 360 | Neotropic | Guevara etal.1994                 | 1994 | Guevara, S., Meave, J., Moreno-Casasola, P., Laborde, J., & Castillo, S.                                                | Vegetación Y Flora De Potrerros En La Sierra De Los Tuxtlas, México                                                                                                                               | Acta Botanica Mexicana                      | México    |
| 361 | Neotropic | Gutierrez & Linares Escalante2002 | 2002 | Gutierrez, J. F., & Linares Escalante, G. M.                                                                            | Composición Florística De La Vegetación Riparia De "Quebrada Grande". Morocelí, El Paraíso, Honduras, C.A.                                                                                        | Tesis Grado                                 | Honduras  |
| 362 | Neotropic | Gutierrez2010                     | 2010 | Gutierrez, L. A.                                                                                                        | Inventario Florístico Del Sector De Buga Alto Del Bosque De Paquiestancia, Cayambe - Ecuador 2008                                                                                                 | Tesis Grado                                 | Ecuador   |
| 363 | Neotropic | Gutierrez2014                     | 2014 | Gutiérrez, N. Y.                                                                                                        | Diversidad de epífitas vasculares en bosques perturbados de diferentes edades en el Valle del Río San Francisco al sur de Ecuador                                                                 | Tesis Grado                                 | Ecuador   |
| 364 | Neotropic | Guzman & Moreno2014               | 2014 | Gúzman, N. A., & Moreno, B. J.                                                                                          | Caracterización de la composición y estructura de macroinvertebrados acuáticos en la fitotelma de bromelias epífitas en la Estación Científica Timburi-Cocha (San José de Payamino-Orellana)      | Tesis Grado                                 | Ecuador   |
| 365 | Neotropic | Guzman-Jacob2013                  | 2013 | Guzmán-Jacob, V.                                                                                                        | Diversidad De Macroartrópodos Asociados A Tres Especies De Tillandsia (Bromeliaceae) En Tlalnelhuayocan, Veracruz                                                                                 | Tesis Magister                              | México    |
| 366 | Neotropic | Guzman-Jacob etal.2020            | 2020 | Guzmán-Jacob, V., Zotz, G., Craven, D., Taylor, A., Krömer, T., Monge-González, M. L., & Krefl, H.                      | Effects of forest-use intensity on vascular epiphyte diversity along an elevational gradient                                                                                                      | Diversity and Distributions                 | México    |
| 367 | Neotropic | Guzman-Marin & Saldaña2017        | 2017 | Guzmán-Marín, R., & Saldaña, A.                                                                                         | Contribución Del Epifitismo Accidental A La Distribución De Especies De Plantas                                                                                                                   | Gayana Botanica                             | Chile     |

| id  | Region    | Source                                  | Year | Author                                                                                                       | Title                                                                                                                                                                | Journal                                 | Country   |
|-----|-----------|-----------------------------------------|------|--------------------------------------------------------------------------------------------------------------|----------------------------------------------------------------------------------------------------------------------------------------------------------------------|-----------------------------------------|-----------|
|     |           |                                         |      |                                                                                                              | Vasculares En Un Bosque Templado Lluvioso Del Sur De Chile                                                                                                           |                                         |           |
| 368 | Neotropic | Hauenstein etal.2014                    | 2014 | Hauenstein, E., Peña-Cortés, F., Bertrán, C., Tapia, J., Vargas-Chacoff, L., & Urrutia, O.                   | Composición Florística Y Evaluación De La Degradación Del Bosque Pantanoso Costero De Temu-Pitra En La Región De La Araucanía, Chile                                 | Gayana Botanica                         | Chile     |
| 369 | Neotropic | Hernandez etal.2005                     | 2005 | Hernández, K. R., Nelson, C. H., Mejia-Ordoñez, T., & Borjas, G.                                             | Diversidad De Helechos En El Sendero La Esperanza Del Parque Nacional La Tigra, Honduras                                                                             | Ceiba                                   | Honduras  |
| 370 | Neotropic | Hernandez-Lopez etal.2015               | 2015 | Hernandez-Lopez, L., Flores-Argüelles, A., & Reynoso-Dueñas, J.                                              | Riqueza De Epífitas Vasculares En Tres Sitios De Jalisco, México                                                                                                     | Revista Mexicana de Ciencias Forestales | México    |
| 371 | Neotropic | Hernandez-Ramos & Martinez-Melendez2020 | 2020 | Hernández-Ramos, J. C., & Martínez-Meléndez, N.                                                              | El Encuentro Con Eurystyles Borealis, Una Orquidea Rara De La Sierra Madre De Chiapas                                                                                | Desde el Herbario CICY                  | México    |
| 372 | Neotropic | Hernandez-Rosas1999                     | 1999 | Hernández-Rosas, J. I.                                                                                       | Diversidad De Grupos Funcionales De Plantas Del Dosel De Un Bosque Húmedo Tropical Del Alto Orinoco, Estado Amazonas, Venezuela                                      | Ecotropicos                             | Venezuela |
| 373 | Neotropic | Hernandez-Rosas2000                     | 2000 | Hernández-Rosas, J. I.                                                                                       | Patrones De Distribucion De Las Epifitas Vasculares Y Arquitectura De Los Forofitos De Un Bosque Humedo Tropical Del Alto Orinoco, Edo. Amazonas, Venezuela          | Acta Biológica Venezolana               | Venezuela |
| 374 | Neotropic | Herrera-Soriano etal.2018               | 2018 | Herrera-Soriano, A., Arreguin-Sánchez, M. L., Meza-Padilla, J. L., Lepe-Becerra, L. A., & Fernández-Nava, R. | Descripción Morfogénica De Gametófitos Y Esporófitos Jóvenes De Pleopeltis Astrolepis (Liebm.) Fournier (Polypodiaceae-Polypodiidae)                                 | Polibotánica                            | México    |
| 375 | Neotropic | Hidalgo2020                             | 2020 | Hidalgo, E. A.                                                                                               | Caracterización De La Composición Y Estructura De La Comunidad De Invertebrados Terrestres Asociados A Bromelias Epífitas En San José De Payamino, Orellana, Ecuador | Tesis Grado                             | Ecuador   |
| 376 | Neotropic | Hietz & Briones1998                     | 1998 | Hietz, P., & Briones, O.                                                                                     | Correlation Between Water Relations And Within-Canopy Distribution Of Epiphytic Ferns In A Mexican Cloud Forest                                                      | Oecologia                               | México    |
| 377 | Neotropic | Hietzetal2006                           | 2006 | Hietz, P., Buchberger, G., & Winkler, M.                                                                     | Effect Of Forest Disturbance On Abundance And Distribution Of Epiphytic Bromeliads And Orchids                                                                       | Ecotropica                              | México    |
| 378 | Neotropic | Hietz & Hietz-Seifer1995                | 1995 | Hietz, P., & Hietz-Seifert, U.                                                                               | Intra- And Interspecific Relations Within An Epiphyte Community In A Mexican Humid Montane Forest                                                                    | Selbyana                                | México    |

| id  | Region    | Source                | Year | Author                                                                  | Title                                                                                                                                                                                                | Journal                                      | Country    |
|-----|-----------|-----------------------|------|-------------------------------------------------------------------------|------------------------------------------------------------------------------------------------------------------------------------------------------------------------------------------------------|----------------------------------------------|------------|
| 379 | Neotropic | Higuera & Wolf2010    | 2010 | Higuera, D., & Wolf, J. H. D.                                           | Vascular Epiphytes In Dry Oak Forests Show Resilience To Anthropogenic Disturbance, Cordillera Oriental, Colombia                                                                                    | Caldasia                                     | Colombia   |
| 380 | Neotropic | Huallpa Estrada2014   | 2014 | Huallpa Estrada, V. H.                                                  | Diversidad De La Flora Epífita En Cuatro Localidades Del Distrito De Machupicchu -Urubamba-Cusco                                                                                                     | Tesis Grado                                  | Perú       |
| 381 | Neotropic | Huaman2016            | 2016 | Huamán, M. D.                                                           | Preferencias De Hábitat De Orquídeas Epífitas En Los Bosques Nublados De La Estación Biológica Wayqecha - Manu, Cusco                                                                                | Tesis Grado                                  | Perú       |
| 382 | Neotropic | Huatangare2000        | 2000 | Huatangare, E.                                                          | Ecología Y Distribución De Phragmipedium Spp Y Catasetum Spp (Orchidaceae) En La Cuenca Alta Del Ahuashuyacu, Cordillera Escalera, Región San Martín, Perú                                           | Tesis Grado                                  | Perú       |
| 383 | Neotropic | Hurtado2017           | 2017 | Hurtado, H. A.                                                          | Caracterización Y Distribución Vertical De Epífitas Vasculares (Orquídeas Y Bromelias) Y Hospederos En Un Ecosistema De Selva En El Sur Del Perú                                                     | Tesis Magister                               | Perú       |
| 384 | Neotropic | Hurtado etal.2017     | 2017 | Hurtado, H. A., Orozco, J., & Betancur, J. F. (2017). . , 8(2), 91-106. | Caracterización Y Distribución Vertical De Epífitas Vasculares - Orquídeas Y Bromelias- Y Hospederos En Ecosistema De Selva En Sur De Perú                                                           | Revista de Investigación Agraria y Ambiental | Perú       |
| 385 | Neotropic | Ibisch etal.2001      | 2001 | Ibisch, P., Darius, R., Vargas, I. G., & Camacho, E.                    | El Bosque De Neblina "Laguna Verde" En Las Vecindades Del Parque Nacional Amboró (Prov. M.M. Caballero, Dpto. Santa Cruz, Bolivia): Diversidad Florística, Relaciones Fitogeográficas Y Conservación | Revista de la Sociedad Boliviana de Botánica | Bolivia    |
| 386 | Neotropic | Infante Betancour2016 | 2016 | Infante Betancour, J. A.                                                | Plantas Con Flores De La Amazonía Colombiana: Riqueza, Endemismo Y Representatividad En La Gran Región Amazónica                                                                                     | Tesis Magister                               | Colombia   |
| 387 | Neotropic | Ingram etal.1996      | 1996 | Ingram, S. W., Ferrell-Ingram, K., & Nadkarni, N. M.                    | Floristic Composition Of Vascular Epiphytes In A Neotropical Cloud Forest, Monteverde, Costa Rica                                                                                                    | Selbyana                                     | Costa Rica |
| 388 | Neotropic | Izaguirre2013         | 2013 | Izaguirre, P.                                                           | Novedades En Orquídeas Para Uruguay: Segunda Contribución. Plantas Epífitas                                                                                                                          | Agrociencia Uruguay                          | Uruguay    |
| 389 | Neotropic | Jacinto2019           | 2019 | Jacinto, F., Sonia Karina.                                              | Diversidad De La Familia Orchidaceae En La Zona De Amortiguamiento - Reserva Comunal Chayu Nain, Aramango-Amazonas                                                                                   | Tesis Grado                                  | Perú       |

| id  | Region    | Source                   | Year | Author                                                                                      | Title                                                                                                                                       | Journal                                            | Country              |
|-----|-----------|--------------------------|------|---------------------------------------------------------------------------------------------|---------------------------------------------------------------------------------------------------------------------------------------------|----------------------------------------------------|----------------------|
| 390 | Neotropic | Jimenez & Miranda2007    | 2007 | Jiménez, I. V., & Miranda A, F.                                                             | Epiphyte Orchid Diversity In A Yungas Montane Forest In The Cotapata National Park And Integrated Management Natural Area, La Paz – Bolivia | Lankesteriana International Journal on Orchidology | Bolivia              |
| 391 | Neotropic | Jimenez2014              | 2014 | Jiménez, L.                                                                                 | Impacto Del Aprovechamiento Forestal Sobre Las Epifitas En Un Bosque De Pino-Encino En La Sierra Norte De Oaxaca, México                    | Tesis Magister                                     | México               |
| 392 | Neotropic | Jimenez-Lopez2018        | 2018 | Jimenez-Lopez, D. A.                                                                        | Orquídeas Del Ejido La Esperanza, Las Margaritas, Chiapas, Mexico                                                                           | Lacadonia                                          | México               |
| 393 | Neotropic | Jimenez-Lopez etal.2018  | 2020 | Jiménez-López, D. A., Martínez-Camilo, R., Martínez-Meléndez, N., & Kessler, M.             | Diversity Of Epiphyte Ferns Along An Elevational Gradient In El Triunfo Biosphere Reserve, Southern Mexico                                  | Plant Ecology and Evolution                        | México               |
| 394 | Neotropic | Jimenez-Orozco etal.2019 | 2019 | Jiménez-Orozco, C., Lebrón-Liriano, B., Fernández-Gutiérrez, R., Urbáez, R., & Guerrero, Á. | Caracterización De La Flora Epífita Vascular Del Parque Iberoamérica, Santo Domingo, República Dominicana                                   | Ciencia, Ambiente y Clima                          | República Dominicana |
| 395 | Neotropic | Jimenez-Perez2011a       | 2011 | Jiménez-Pérez, I.                                                                           | Registros Nuevos De Orquídeas De Los Bosques Montanos De Bolivia. Parte II                                                                  | Ecología en Bolivia                                | Bolivia              |
| 396 | Neotropic | Jimenez-Perez2011b       | 2011 | Jiménez-Pérez, I.                                                                           | Registros Nuevos De Orquídeas De Los Bosques Montanos De Bolivia. Parte I                                                                   | Ecología en Bolivia                                | Bolivia              |
| 397 | Neotropic | Jimenez-Perez2012        | 2012 | Jiménez-Pérez, I.                                                                           | Cuatro Especies Nuevas De Telipogon (Orchidaceae) De Los Bosques Montanos De Bolivia                                                        | Brittonia                                          | Bolivia              |
| 398 | Neotropic | Jocaa etal.2017          | 2017 | Joca, T. A. C., Oliveira, D. C. d., Zotz, G., Winkler, U., & Moreira, A. S. F. P.           | The velamen of epiphytic orchids: Variation in structure and correlations with nutrient absorption                                          | Flora                                              | Panama               |
| 399 | Neotropic | Kappelle etal.2000       | 2000 | Kappelle, M., Van Omme, L., & Juárez, M. E.                                                 | Lista De La Flora Vascular De La Cuenca Superior Del Río Savegre, San Gerardo De Dota, Costa Rica                                           | Acta Botanica Mexicana                             | Costa Rica           |
| 400 | Neotropic | Karremans etal.2012      | 2012 | Karremans, A. P., Bogarín, D., Fernández, M., Smith, C. M., & Blanco, M. A.                 | New Species And Records Of Orchidaceae From Costa Rica. Ii                                                                                  | Lankesteriana International Journal on Orchidology | Costa Rica           |
| 401 | Neotropic | Kelly1985                | 1985 | Kelly, D. L.                                                                                | Epiphytes And Climbers Of A Jamaican Rain Forest: Vertical Distribution, Life Forms And Life Histories                                      | Journal of Biogeography                            | Jamaica              |
| 402 | Neotropic | Kernan & Fowler1995      | 1995 | Kernan, C., & Fowler, N.                                                                    | Differential Substrate Use By Epiphytes In Corcovado National Park, Costa Rica: A Source Of Guild Structure                                 | Journal of Ecology                                 | Costa Rica           |
| 403 | Neotropic | Kessler2001              | 2001 | Kessler, M.                                                                                 | Pteridophyte species richness in Andean forests in Bolivia                                                                                  | Biodiversity & Conservation                        | Bolivia              |
| 404 | Neotropic | Kessler2002              | 2002 | Kessler, M.                                                                                 | Species richness and ecophysiological types among Bolivian bromeliad communities                                                            | Biodiversity & Conservation                        | Bolivia              |

| id  | Region    | Source                 | Year | Author                                                                                                                  | Title                                                                                                                                               | Journal                                                             | Country   |
|-----|-----------|------------------------|------|-------------------------------------------------------------------------------------------------------------------------|-----------------------------------------------------------------------------------------------------------------------------------------------------|---------------------------------------------------------------------|-----------|
| 405 | Neotropic | Krömer et al.2013      | 2013 | Krömer, T., Carvajal-Hernandez, C., Guzmán-Jacob, V., López-Acosta, J. C., MacSwiney-Gonzales, C., & Rodríguez-Luna, E. | Riqueza de grupos selectos de plantas en selva alta perennifolia y acahuales en el municipio de Catemaco, Veracruz, México                          | Congreso                                                            | México    |
| 406 | Neotropic | Krömer et al.2020      | 2020 | Krömer, T., Espejo-Serna, A., López-Ferrari, A., Acebey, A., García-Cruz, J., & Mathieu, G.                             | Las angiospermas epifitas del estado de Veracruz, México: diversidad y distribución                                                                 | Revista Mexicana De Biodiversidad                                   | México    |
| 407 | Neotropic | Krömer & Gradstein2010 | 2010 | Krömer, T., & Gradstein, S.                                                                                             | Impact of deforestation and forest regrowth on vascular epiphyte diversity in the Andes of Bolivia                                                  | Capitulo Libro                                                      | Bolivia   |
| 408 | Neotropic | Krömer et al.2007      | 2007 | Krömer, T., Gradstein, S., & Acebey, A.                                                                                 | Diversity and ecology of vascular epiphytes in natural montane forests and fallows of Bolivia                                                       | Ecología en Bolivia                                                 | Bolivia   |
| 409 | Neotropic | Krömer & Gradstein2003 | 2003 | Krömer, T., & Gradstein, S. R.                                                                                          | Species Richness of Vascular Epiphytes in Two Primary Forests and Fallows in the Bolivian Andes                                                     | Selbyana                                                            | Bolivia   |
| 410 | Neotropic | Krömer et al.2008      | 2008 | Krömer, T., Jimenez, I., & Kessler, M.                                                                                  | Patrones de diversidad y distribución vertical en epifitas vasculares en la Cordillera Mosetenes, Cochabamba, Bolivia                               | Revista Boliviana de Ecología y Conservación Ambiental              | Bolivia   |
| 411 | Neotropic | Krömer & Kessler2006   | 2006 | Krömer, T., & Kessler, M.                                                                                               | Filmy Ferns (Hymenophyllaceae) As High-Canopy Epiphytes                                                                                             | Ecotropica                                                          | Bolivia   |
| 412 | Neotropic | Kupec et al.2017       | 2017 | Kupec, A., Madera, P., & Kupec, P.                                                                                      | Flowering Epiphytes In Secondary Mangrove Forest As A Potential Target For Increasing The Recreational Attractiveness In Green Rezerva In Nicaragua | Public recreation and landscape protection with nature hand in hand | Nicaragua |
| 413 | Neotropic | Laube2006              | 2006 | Laube, S.                                                                                                               | Long-Term Changes Of Vascular Epiphyte Assemblages In The Tropical Lowlands Of Panama                                                               | Tesis Doctor                                                        | Panama    |
| 414 | Neotropic | Laube & Zotz2003       | 2003 | Laube, S., & Zotz, G.                                                                                                   | Which abiotic factors limit vegetative growth in a vascular epiphyte?                                                                               | Functional Ecology                                                  | Panama    |
| 415 | Neotropic | Laverdeza et al.2019   | 2019 | Laverdeza, R. M. B., Cantillo, F. A., Ruano, M. D., Ojeda, J. B., & Verdecia, N. A. P.                                  | Espermatófitos de la Reserva Natural El Retiro, Santiago de Cuba                                                                                    | Revista del Jardín Botánico Nacional                                | Cuba      |
| 416 | Neotropic | Lay2014                | 2014 | Lay, T.                                                                                                                 | Presencia de orquídeas epifitas como indicadores de calidad ambiental en el Jardín Botánico Aeboretum El Huayo Puerto Almendra, Loreto- Perú        | Tesis Magister                                                      | Perú      |
| 417 | Neotropic | Levy Tacher et al.2006 | 2006 | Levy Tacher, S. I., Aguirre Rivera, J. R., García Perez, J. D., & Martínez Romero, M. M.                                | Aspectos florísticos de Lacanhá Chansayab, Selva Lacandona, Chiapas                                                                                 | Acta Botanica Mexicana                                              | México    |
| 418 | Neotropic | Londoño & Torres2015   | 2015 | Londoño, L. V., & Torres, A. M.                                                                                         | Estructura y composición vegetal de un bosque seco tropical en regeneración en Bataclán (Cali, Colombia)                                            | Colombia Forestal                                                   | Colombia  |

| id  | Region    | Source                      | Year | Author                                                                                                                                           | Title                                                                                                                       | Journal                                            | Country   |
|-----|-----------|-----------------------------|------|--------------------------------------------------------------------------------------------------------------------------------------------------|-----------------------------------------------------------------------------------------------------------------------------|----------------------------------------------------|-----------|
| 419 | Neotropic | Lopez & Ramirez2004         | 2004 | López, M. J., & Ramirez, N.                                                                                                                      | Composición Florística Y Abundancia De Las Especies En Un Remanente De Bosque Deciduo Secundario                            | Acta Biológica Venezuelica                         | Venezuela |
| 420 | Neotropic | Lopez2018                   | 2018 | Lopez, M. M.                                                                                                                                     | Diversidad De Orquídeas En Áreas Silvestres Y De Uso Antrópico De La Región Del Tequendama, Cordillera Oriental De Colombia | Tesis Grado                                        | Colombia  |
| 421 | Neotropic | Lopez Vargas etal.2015      | 2015 | López Vargas, L. E., Becoche Mosquera, J. M., Macías Pinto, D. J., Ruiz Montoya, K., Velasco Reyes, A., & Pineda, S.                             | Estructura Y Composición Florística De La Reserva Forestal - Institución Educativa Cajete, Popayán (Cauca)                  | Revista Luna Azul                                  | Colombia  |
| 422 | Neotropic | Lopez-Lopez etal.2020       | 2020 | López-López, J. I., Parra-Tabla, V., & Mondragón, D.                                                                                             | Variación En La Fenología De Floración De Una Bromelia Epífita A Lo Largo De Un Gradiente De Elevación                      | Acta Biológica Colombiana                          | México    |
| 423 | Neotropic | Lujan etal.2011             | 2011 | Lujan, M., Gutierrez, N., Gaviria, J., & Aranguren, A.                                                                                           | Estudio Florístico Preliminar En La Ciudad De Mérida, Estado Mérida, Venezuela                                              | PITTIERIA                                          | Venezuela |
| 424 | Neotropic | Luna-Rosales etal.2007      | 2007 | Luna-Rosales, B. S., Barba-Alvarez, A., Romero-Tirado, R., PÉRez-Toledano, E., Perea-Morales, O., Padrón-Hernández, S., . . . Jardón-Sánchez, D. | Diversidad De Orquídeas En El “Parque Nacional Iztaccihuatl-Popocatepetl” (México) Y Sus Áreas De Influencia                | Lankesteriana International Journal on Orchidology | México    |
| 425 | Neotropic | Mai2014                     | 2014 | Mai, P.                                                                                                                                          | Flora Epífita Vascular De Uruguay Con Énfasis En Helechos (Poypodiofitas)                                                   | Tesis Magister                                     | Uruguay   |
| 426 | Neotropic | Mai etal.2019               | 2019 | Mai, P., Rossado, A., Bonifacino, J. M., & Waechter, J. L.                                                                                       | Catalogue Of The Vascular Epiphytic Flora Of Uruguay                                                                        | Acta Botanica Brasilica                            | Uruguay   |
| 427 | Neotropic | Malagon2008                 | 2008 | Malagon, W. M.                                                                                                                                   | Composición Florística, Estructural Y Diversidad De Los Bosques De La Reserva Forestal Galilea, Tolima (Colombia)           | Tesis Magister                                     | Colombia  |
| 428 | Neotropic | Maldonado Flores2005        | 2005 | Maldonado Flores, C.                                                                                                                             | Patrón De Distribución Espacial Y Dinámica Poblacional De Oncidium Crista Galli, Una Especie De Orquidea Epífita De Chiapas | Tesis Magister                                     | México    |
| 429 | Neotropic | Martinez Gordillo etal.2004 | 2004 | Martínez Gordillo, M., Cruz DurÁN, R., Castrejón Reyna, J. F., Valencia ÁValos, S., Jiménez RamÍRez, J., & Ruiz-Jiménez, C. A.                   | Flora Vascular De La Porción Guerrerense De La Sierra De Taxco, Guerrero, México                                            | Anales del Instituto de Biología. Serie Botánica   | México    |
| 430 | Neotropic | Martinez-Cabrera etal.2018  | 2018 | Martínez-Cabrera, D., Hernández-Hernández, N., Isidro-Hernández, B., Hernández Álvarez, A. G., & Sánchez-González, A.                            | Diversidad de lycopodios y helechos del bosque tropical subcaducifolio del estado de Hidalgo, México                        | Acta Botanica Mexicana                             | México    |
| 431 | Neotropic | Martinez-Camilo etal.2012   | 2012 | Martínez-Camilo, R., Pérez-Farrera, M. Á., & Martínez-Meléndez, N.                                                                               | Listado de plantas endémicas y en riesgo de la Reserva de la Biosfera El Triunfo, Chiapas, México                           | Botanical Sciences                                 | México    |
| 432 | Neotropic | Martinez-Ico etal.2015      | 2015 | Martínez-Icó, M., Cetzal-Ix, W., Noguera-Savelli, E., & Hernández-Juárez, R.                                                                     | Flora vascular de la comunidad de Bazom, Los Altos de Chiapas, México                                                       | Botanical Sciences                                 | México    |

| id  | Region    | Source                                  | Year | Author                                                                   | Title                                                                                                                           | Journal                                              | Country     |
|-----|-----------|-----------------------------------------|------|--------------------------------------------------------------------------|---------------------------------------------------------------------------------------------------------------------------------|------------------------------------------------------|-------------|
| 433 | Neotropic | Martinez-Melendez etal.2008             | 2008 | Martinez-Melendez, J., Farrera, M. A., & Farrera-Sarmiento, O.           | Floristic inventory of the Mt. El Cebu and adjacent zones in Polygon V of the El Triunfo Biosphere Reserve                      | Boletin De La Sociedad Botanica De Mexico            | México      |
| 434 | Neotropic | Martinez-Melendez etal.2017             | 2017 | Martínez-Meléndez, N., Martínez-Meléndez, M., & García-Martínez, R.      | Lockhartia hercodonta (Orchidaceae) en el volcán Tacaná, primer registro para la flora de Chiapas y México                      | Revista Mexicana De Biodiversidad                    | México      |
| 435 | Neotropic | Martinez-Melendez & Perez-Farrera2010   | 2010 | Martínez-Meléndez, N., & Pérez-Farrera, M. A.                            | Riqueza y composición de las epífitas vasculares a lo largo de un gradiente altitudinal en la Reserva de la Biosfera El Triunfo | Capitulo Libro                                       | México      |
| 436 | Neotropic | Martinez-Melendez etal.2018             | 2018 | Martínez-Meléndez, N., Trejo-Cruz, I. A., & Martínez-Meléndez, M.        | Diversidad de epífitas en un bosque de pino-encino con actividades silvícolas en Chiapas, México                                | Desde el Herbario CICY,                              | México      |
| 437 | Neotropic | Mejia & Pino2010                        | 2010 | Mejía, H., & Pino, N.                                                    | Diversidad de orquídeas epífitas en un bosque húmedo tropical (bh-T) del departamento del Chocó                                 | Acta Biológica Colombiana                            | Colombia    |
| 438 | Neotropic | Mendoza-Cifuentes & Cordoba-Sanchez2018 | 2018 | Mendoza-Cifuentes, H., & Córdoba-Sánchez, M. P.                          | Catálogo De La Flora De Los Parques Nacionales Naturales De Colombia: Parque Nacional Natural El Tuparro                        | Biota Colombiana                                     | Colombia    |
| 439 | Neotropic | Merino etal.2009                        | 2009 | Merino, G., Doucette, A., & Pupulin, F.                                  | New Species Of Porroglossum (Orchidaceae: Pleurothallidinae) From Ecuador                                                       | Lankesteriana International Journal on Orchidology   | Ecuador     |
| 440 | Neotropic | Migenis & Ackerman1993                  | 1993 | Migenis, L. E., & Ackerman, J. D.                                        | Orchid-Phorophyte Relationships In A Forest Watershed In Puerto Rico                                                            | Journal of Tropical Ecology                          | Puerto Rico |
| 441 | Neotropic | Mondragón etal.2017                     | 2017 | Mondragón, A., Alvarado, H., García, J., & Dávila, M.                    | Contribución Al Conocimiento De La Riqueza Florística En El Estado Lara, Venezuela                                              | Revista Ecuatoriana de Investigaciones Agropecuarias | Venezuela   |
| 442 | Neotropic | Mondragón & Garcia2011                  | 2011 | Mondragón, A., & García, J.                                              | Pteridoflora (Polypodiophyta) De Una Parcela En El Bosque Ribereño "El Tambor" Del Municipio Morán, Estado Lara, Venezuela      | PITTIERIA                                            | Venezuela   |
| 443 | Neotropic | Mondragón & Calvo-Irabien2006           | 2006 | Mondragón, D., & Calvo-Irabien, L. M.                                    | Seed Dispersal And Germination Of The Epiphyte Tillandsia Brachycaulos (Bromeliaceae) In A Tropical Dry Forest, Mexico          | The Southwestern Naturalist                          | México      |
| 444 | Neotropic | Mondragón & Villa-Guzman2008            | 2008 | Mondragón, D., & Villa-Guzmán, D.                                        | Estudio etnobotánico de las bromelias epífitas en la comunidad de Santa Catarina Ixtepeji, Oaxaca, México                       | Polibotánica                                         | México      |
| 445 | Neotropic | Mondragón etal.2006                     | 2006 | Mondragón, D., Villa-Guzmán, D., Escobedo-Sarti, G., & Franco-Méndez, A. | La riqueza de bromelias epífitas a lo largo de un gradiente altitudinal en Santa Catarina Ixtepeji, Oaxaca, México              | Naturaleza y Desarrollo                              | México      |
| 446 | Neotropic | Montalvan2017                           | 2017 | Montalvan, D.                                                            | Especies epífitas vasculares en Ficus sp. y Alzatea verticillata en la ACP Bosque                                               | Tesis Grado                                          | Perú        |

| id  | Region    | Source                      | Year | Author                                                                                                            | Title                                                                                                                                                                | Journal                                 | Country    |
|-----|-----------|-----------------------------|------|-------------------------------------------------------------------------------------------------------------------|----------------------------------------------------------------------------------------------------------------------------------------------------------------------|-----------------------------------------|------------|
|     |           |                             |      |                                                                                                                   | berlín, Utcubamba Amazonas                                                                                                                                           |                                         |            |
| 447 | Neotropic | Mora etal.2015              | 2015 | Mora, J., Espinal, M., Lopez, L., & Quezada, B.                                                                   | Caracterización del Bosque Seco Tropical Remanente en el Valle de Agalta, Honduras                                                                                   | Ceiba                                   | Honduras   |
| 448 | Neotropic | Morales Linares2012         | 2012 | Morales Linares, J.                                                                                               | Diversidad Y Conservación De Orquídeas En Plantaciones De Cacao Del Sureste De México                                                                                | Tesis Magister                          | México     |
| 449 | Neotropic | Morales-Hernandez etal.2016 | 2016 | Morales-Hernández, J. L., González-Razo, F. d. J., & Pérez-Chávez, M. A.                                          | Caracterización De Las Orquídeas Epífitas Y Sus Forofitos En El Parque Ecológico Universitario "José Mariano Mociño" De La Universidad Autónoma Del Estado De México | Polibotánica                            | México     |
| 450 | Neotropic | Morales-Linares etal.2015   | 2015 | Morales-Linares, J., Toledo-Aceves, T., Flores-Palacios, A., Krömer, T., & García-Franco, J. G.                   | Registros nuevos de Orchidaceae para el estado de Tabasco, México                                                                                                    | Revista Mexicana De Biodiversidad       | México     |
| 451 | Neotropic | Morales-Saldaña etal.2015   | 2015 | Morales-Saldaña, S., Martínez-Ambriz, E., & Valencia-Avalos, S.                                                   | Estudio Florístico y de la vegetación del municipio de Buenavista de Cuéllar, Guerrero, México                                                                       | Botanical Sciences                      | México     |
| 452 | Neotropic | Moran etal.2003             | 2003 | Moran, R. C., Klimas, S., & Carlsen, M.                                                                           | Low-Trunk Epiphytic Ferns on Tree Ferns Versus Angiosperms in Costa Rica                                                                                             | Biotropica                              | Costa Rica |
| 453 | Neotropic | Mora-Olivo etal.2018        | 2018 | Mora-Olivo, A., Estrada-Castillon, E., Pando-Moreno, M., de la Rosa-Manzano, E., & Jurado, E.                     | Vertical epiphyte distribution and its phylogeny in a mesophilic cloud forest of Tamaulipas                                                                          | Revista Mexicana de Ciencias Forestales | México     |
| 454 | Neotropic | Moreno Gonzales etal.2013   | 2013 | Moreno González, R., Quesne, C., Díaz, I., & Rodríguez, R.                                                        | Vascular Flora Of Futangue Park, Región De Los Ríos (Chile)                                                                                                          | Gayana. Botánica                        | Chile      |
| 455 | Neotropic | Moreno & Vasquez2011        | 2011 | Moreno, R., & Vásquez, S.                                                                                         | Segundo Estudio De Biodiversidad En La Reserva Biologica "El Chile" Noviembre 2011                                                                                   | Informe Tecnico                         | Honduras   |
| 456 | Neotropic | Moreno-Chacon2020           | 2020 | Moreno-Chacón, M.                                                                                                 | Distribución De La Diversidad De Epífitas Vasculares En Chile: Aproximaciones Taxonómica Y Funcional                                                                 | Tesis Doctor                            | Chile      |
| 457 | Neotropic | Moreno-Chacon etal.2018     | 2018 | Moreno-Chacón, M., Mardones, D., Viveros, N., Madriaza, K., Carrasco-Urra, F., Marticorena, A., . . . Saldaña, A. | Vascular flora of a remnant of coastal Mediterranean Sclerophyll forest: Hualpén Terrestrial Biology Station, Biobío Region, Chile                                   | Gayana Botanica                         | Chile      |
| 458 | Neotropic | Moreno-Chacon & Saldaña2019 | 2019 | Moreno-Chacón, M., & Saldaña, A. (2019). . . 57(1), 18-31. doi:10.1080/0028825X.2018.1538050                      | $\alpha$ , $\beta$ and $\gamma$ -diversity of vascular epiphytes along the climatic gradient of continental Chile                                                    | New Zealand Journal of Botany           | Chile      |
| 459 | Neotropic | Moscoso Zambrano etal.2003  | 2003 | Moscoso Zambrano, D., Salinas Revilla, N., & Nauray Huari, W.                                                     | Orquídeas del Valle de Cosñipata, Parte Alta de la Reserva de Biósfera del Manu, Cusco – Peru                                                                        | Lyonia                                  | Perú       |
| 460 | Neotropic | Muñoz etal.2003             | 2003 | Muñoz, A. A., Chacón, P., Pérez, F., Barnert, E. S., & Armesto, J. J.                                             | Diversity and host tree preferences of vascular epiphytes and vines in a temperate rainforest in southern Chile                                                      | Australian Journal of Botany            | Chile      |

| id  | Region    | Source                          | Year | Author                                                                                                                             | Title                                                                                                                                                             | Journal                                                         | Country         |
|-----|-----------|---------------------------------|------|------------------------------------------------------------------------------------------------------------------------------------|-------------------------------------------------------------------------------------------------------------------------------------------------------------------|-----------------------------------------------------------------|-----------------|
| 461 | Neotropic | Muñoz-Hernandez et al.2020      | 2020 | Muñoz-Hernández, A. E., Figueroa-Castro, D. M., & Campos-Villanueva, Á.                                                            | Seasonal variation in the diversity of flowering orchids at Santa Catarina Lachatao, Oaxaca, Mexico                                                               | Botanical Sciences                                              | México          |
| 462 | Neotropic | Naranjo et al.2010              | 2010 | Naranjo, E., Ramírez, T., & Aguirre, Z.                                                                                            | FLORA Y ENDEMISMO DEL BOQUE HUMEDO TROPICAL DE LA QUINTA EL PADMI, ZAMORA CHINCHIPE                                                                               | Revista de la Carrera de Ingeniería Forestal. Ecología Forestal | Ecuador         |
| 463 | Neotropic | Fernandez et al.2010            | 2010 | Fernández, N., Fontenla, S., & Messuti, M. I.                                                                                      | Mycorrhizal Status of Obligate and Facultative Epiphytic Ferns in a Valdivian Temperate Forest of Patagonia, Argentina                                            | American Fern Journal                                           | Argentina       |
| 464 | Neotropic | Noguera-Savelli & Cetzal Ix2014 | 2014 | Noguera-Savelli, E., & Cetzal Ix, W.                                                                                               | Revisión e integración del conocimiento de las Orchidaceae de Tabasco, México                                                                                     | Botanical Sciences                                              | México          |
| 465 | Neotropic | Novais et al.2020               | 2020 | Novais, S., Sáyago, R., Cristóbal-Perez, E. J., Salguero-Hernández, G., Martén-Rodríguez, S., Lopezaraiza-Mikel, M., & Quesada, M. | Anthropogenic And Hurricane Disturbances Had Similar Negative Effects On Epiphytic Tillandsia Species In A Tropical Dry Forest                                    | Forest Ecology and Management                                   | México          |
| 466 | Neotropic | Nuñez-Barrizonte et al.2011     | 2011 | Nuñez-Barrizonte, A., Fernandez-Castillo, L., & Vento-Rivero, I.                                                                   | Contribución Al Estudio De Las Epífitas Como Producto Forestal No Maderable De Valor Cultural                                                                     | Revista Forestal Baracoa                                        | Cuba            |
| 467 | Neotropic | Olaya2016                       | 2016 | Olaya, R. D.                                                                                                                       | Capacidad De Almacenamiento Hídrico En Cinco Especies De Bromelias Epífitas En El Bosque De Neblina "Los Chumucos" - Ayabaca - Piura                              | Tesis Grado                                                     | Perú            |
| 468 | Neotropic | Olmsted & Gomez-Juarez1996      | 1996 | Olmsted, I., & Gómez-Juárez, M.                                                                                                    | Distribution And Conservation Of Epiphytes On The Yucatan Peninsula                                                                                               | Selbyana                                                        | México          |
| 469 | Neotropic | Orivel & Dejean1999             | 1999 | Orivel, J., & Dejean, A.                                                                                                           | Selection of epiphyte seeds by ant-garden ants                                                                                                                    | Ecoscience                                                      | Guyana Francesa |
| 470 | Neotropic | Orta Pozo2012                   | 2012 | Orta Pozo, S.                                                                                                                      | Acciones de manejo para la conservación de orquídeas epífitas en la zona de transición oeste de la Reserva de la Biosfera Sierra del Rosario                      | Tesis Doctor                                                    | Cuba            |
| 471 | Neotropic | Ospina-Bautista et al.2014      | 2014 | Ospina-Bautista, F., Estévez-Varón, J. V., Betancourt, J., & Realpe-Rebolledo, E.                                                  | Estructura y composición de la comunidad de macro invertebrados acuáticos asociados a Tillandsia turneri Baker (Bromeliaceae) en un bosque alto andino colombiano | Acta Zoológica Mexicana                                         | Colombia        |
| 472 | Neotropic | Ospina-Calderon et al.2009      | 2009 | Ospina-Calderón, N. H., Espinosa, C. I., Bodas, C., Guzmán, E., & Nole, P. I.                                                      | Estratificación Vertical De La Comunidad De Orquídeas En Un Bosque Montano En Loja, Ecuador                                                                       | Capitulo Libro                                                  | Ecuador         |
| 473 | Neotropic | Padilla Velarde et al.2008      | 2008 | Padilla Velarde, E., Cuevas Guzmán, R., & Koch, S. D.                                                                              | Plantas vasculares y vegetación de la parte alta del Arroyo Agua Fría, municipio de Minatitlán, Colima, México                                                    | Acta Botanica Mexicana                                          | México          |

| id  | Region    | Source                           | Year | Author                                                                                              | Title                                                                                                                                                            | Journal                                   | Country  |
|-----|-----------|----------------------------------|------|-----------------------------------------------------------------------------------------------------|------------------------------------------------------------------------------------------------------------------------------------------------------------------|-------------------------------------------|----------|
| 474 | Neotropic | Paez-Gerardo et al.2005          | 2005 | Páez-Gerardo, L. E., Aguilar-Rodríguez, S., Terrazas, T., Huidobro-Salas, M. E., & Aguirre-León, E. | Cambios Anatómicos En La Corteza De Parkinsonia Praecox (Ruiz Et Pavón) Hawkins Causados Por La Epífita Tillandsia Recurvata L. (Bromeliaceae)                   | Boletin De La Sociedad Botanica De Mexico | México   |
| 475 | Neotropic | Palacios2014                     | 2014 | Palacios, H. L.                                                                                     | Inventario Taxonómico De Especies De La Familia Orchidaceae En Un Área De Bosque Andino Del Predio La Sierra, Santuario De Fauna Y Flora Guanentá Alto Río Fonce | Tesis Grado                               | Colombia |
| 476 | Neotropic | Pallo Alomoto & Vaca Cabezas2016 | 2016 | Pallo Alomoto, J. J., & Vaca Cabezas, S. D.                                                         | Cálculo Del Contenido De Carbono De Las Especies De Epífitas Del Bosque De La Estación Científica Kutukú, Parroquia Sevilla De Oro, Cantón Macas                 | Tesis Grado                               | Ecuador  |
| 477 | Neotropic | Pangol & Tapay2017               | 2017 | Pangol, C. I., & Tapay, W.                                                                          | Evaluacion De Epífitas En Árboles Hospederos Dentro De Bosques Andinos En La Provincia Del Azuay                                                                 | Tesis Grado                               | Ecuador  |
| 478 | Neotropic | Parada-Quintero et al.2012       | 2012 | Parada-Quintero, M., Alarcón-Jiménez, D., & Rosero-Lasprilla, L.                                    | Fenologia De La Floración De Especies Ornitófilas De Estratos Bajos En Dos Hábitats Altoandinos Del Parque Natural Municipal Ranchería (Paipa-Boyacá-Colombia)   | Caldasia                                  | Colombia |
| 479 | Neotropic | Parra-O2006                      | 2006 | Parra-O, C.                                                                                         | General Survey Of The Native Flora Of Puerto Carreño (Vichada, Colombia)                                                                                         | Caldasia                                  | Colombia |
| 480 | Neotropic | Pelaez2011                       | 2011 | Pelaez, F.                                                                                          | Diversidad De Los Helechos Y Plantas Afines En El Bosque Pablo Yacu (Moyobamba-San Martín), 2009-2010                                                            | Tesis Doctor                              | Perú     |
| 481 | Neotropic | Pelaez & Vanegas2002             | 2002 | Pelaez, N., & Vanegas, G.                                                                           | Inventario Preliminar De Las Orquídeas Nativas De Los Paramos Y Bosques Altoandinos Del Noroccidente Medio De Antioquia                                          | Informe Tecnico                           | Colombia |
| 482 | Neotropic | Peñafiel Cevallos2003            | 2003 | Peñafiel Cevallos, M.                                                                               | Flora Y Vegetacion De Cuicocha                                                                                                                                   | Libro                                     | Ecuador  |
| 483 | Neotropic | Peñaherrera1995                  | 1995 | Peñaherrera, C. V.                                                                                  | Inventario Sistemático De Orquídeas Epífitas Del Bosque Nublado Del Cerro Uyuca                                                                                  | Tesis Grado                               | Honduras |
| 484 | Neotropic | Perez Castro & Perez Marquez2012 | 2012 | Perez Castro, Y., & Pérez Márquez, R.                                                               | Relaciones Ecológicas De Orquídeas Epífitas En La Reserva De La Biosfera Sierra Del Rosario                                                                      | Orquideología                             | Cuba     |
| 485 | Neotropic | Perez Lugo2016                   | 2016 | Pérez Lugo, E. R.                                                                                   | Riqueza, Composición Florística Y Distribución De Las Epífitas Vasculares De La Reserva Ecológica "Sierra De Otontepec", Veracruz                                | Tesis Magister                            | México   |

| id  | Region    | Source                          | Year | Author                                                                                          | Title                                                                                                                                                                                                                                 | Journal                                                             | Country    |
|-----|-----------|---------------------------------|------|-------------------------------------------------------------------------------------------------|---------------------------------------------------------------------------------------------------------------------------------------------------------------------------------------------------------------------------------------|---------------------------------------------------------------------|------------|
| 486 | Neotropic | Perez Lugo et al.2014           | 2014 | Pérez Lugo, E. R., Alanís Méndez, J. L., Krömer, T., & Chagoya Fuentes, J. L.                   | Contribución Al Conocimiento De Las Epífitas Vasculares Del Área Natural Protegida “Reserva Ecológica Sierra De Otontepec”, Veracruz                                                                                                  | Revista Biológico Agropecuaria Tuxpan                               | México     |
| 487 | Neotropic | Perez Marquez & Bonet Jonet2009 | 2009 | Pérez Márquez, R., & Bonet Jonet, A.                                                            | Efectos De Algunos Factores Ecológicos En La Distribución De Las Orquídeas Epífitas En Cuatro Montañas De La Reserva De La Biosfera Sierra Del Rosario, Pinar Del Río, Cuba                                                           | Revista del Jardín Botánico Nacional                                | Cuba       |
| 488 | Neotropic | Perez Munguia2017               | 2017 | Pérez Munguía, D. E.                                                                            | Cuatro Nuevos Registros De Orchidaceae Para Honduras                                                                                                                                                                                  | Lankesteriana                                                       | Honduras   |
| 489 | Neotropic | Perez Soto & Lopez Saez2009     | 2009 | Pérez Soto, J., & López Sáez, J. A.                                                             | Estudio Preliminar De Las Orquídeas De La Isla De Ometepe                                                                                                                                                                             | Revista Científica de la Universidad Nacional Autónoma de Nicaragua | Nicaragua  |
| 490 | Neotropic | Perez-Calix1996                 | 1996 | Pérez-Calix, E.                                                                                 | Flora Y Vegetacion De La Cuenca Del Lago De Zirahuen, Michoacan, Mexico                                                                                                                                                               | Informe Tecnico                                                     | México     |
| 491 | Neotropic | Petter2016                      | 2016 | Petter, G.                                                                                      | Effects Of Forest Structure And Dynamics On Vascular Epiphyte Assemblages – Functional Trait Analyses And Modelling Studies                                                                                                           | Tesis Doctor                                                        | Panama     |
| 492 | Neotropic | Pincheira2018                   | 2018 | Pincheira, J.                                                                                   | Consecuencias De La Fragmentación Del Bosque Pantanoso Sobre El Ensamblaje De La Metacomunidad De Epífitas Vasculares Y Plantas Trepadoras: Efecto Del Tamaño Del Fragmento, La Estructura Del Hábitat Y Las Interacciones Biológicas | Tesis Doctor                                                        | Chile      |
| 493 | Neotropic | Pincheira-Ulbrich et al.2016    | 2016 | Pincheira-Ulbrich, J., Hernández, C. E., Saldaña, A., Peña-Cortés, F., & Aguilera-Benavente, F. | Assessing The Completeness Of Inventories Of Vascular Epiphytes And Climbing Plants In Chilean Swamp Forest Remnants                                                                                                                  | New Zealand Journal of Botany                                       | Chile      |
| 494 | Neotropic | Poltz & Zotz2011                | 2011 | Poltz, K., & Zotz, G.                                                                           | Vascular Epiphytes On Isolated Pasture Trees Along A Rainfall Gradient In The Lowlands Of Panama                                                                                                                                      | Biotropica                                                          | Panama     |
| 495 | Neotropic | Promis et al.2013               | 2013 | Promis, A., Bergh, G., Serra, M., & Cruz, G.                                                    | Descripción De La Flora Vascular En El Sotobosque De Un Bosque Pantanoso Y De Una Pradera Antropogénica Húmeda De Juncus Procerus En El Valle Del Río Cisnes, Región De Aysén, Chile                                                  | Gayana Botanica                                                     | Chile      |
| 496 | Neotropic | Pulido & Koch1988               | 1988 | Pulido, M. T. P., & Koch, S. D.                                                                 | Floristic Inventory Of Cerro Tetscotzinco, Texcoco, State Of Mexico                                                                                                                                                                   | Botanical Sciences                                                  | México     |
| 497 | Neotropic | Pupulin & Bogarin2012           | 2012 | Pupulin, F., & Bogarín, D.                                                                      | A New Oncidium From Costa Rica                                                                                                                                                                                                        | Lindleyana                                                          | Costa Rica |

| id  | Region    | Source                                | Year | Author                                                              | Title                                                                                                                                                                                            | Journal                                                              | Country    |
|-----|-----------|---------------------------------------|------|---------------------------------------------------------------------|--------------------------------------------------------------------------------------------------------------------------------------------------------------------------------------------------|----------------------------------------------------------------------|------------|
| 498 | Neotropic | Pupulin etal.2010a                    | 2010 | Pupulin, F., Bogarín, D., & Fernández, M.                           | On The Identity Of Myoxanthus Scandens (Orchidaceae: Pleurothallidinae), With A New Species From Costa Rica                                                                                      | Lankesteriana                                                        | Costa Rica |
| 499 | Neotropic | Pupulin etal.2010b                    | 2010 | Pupulin, F., Bogarín, D., & Smith, C. M. (2010). . , 9(3), 423-430. | Two New Pecies Of Lepanthes From Costa Rica Close To L. Schizocardia (Orchidaceae: Pleurothallidinae)                                                                                            | Lankesteriana                                                        | Costa Rica |
| 500 | Neotropic | Pupulin & Medina2009a                 | 2009 | Pupulin, F., & Medina, H.                                           | A Second Species Of Seegeriella (Orchidaceae: Oncidiinae)                                                                                                                                        | Selbyana                                                             | Costa Rica |
| 501 | Neotropic | Pupulin etal.2010c                    | 2010 | Pupulin, F., Medina, H., & Bogarín, D. (2011). . , 3, 117-121.      | Two Lepanthes (Orchidaceae: Pleurothallidinae) With Strongly Reduced Corolla                                                                                                                     | Orchids Journal                                                      | Costa Rica |
| 502 | Neotropic | Pupulin & Merino2009b                 | 2009 | Pupulin, F., & Merino, G. (2009). . 9(3), 399-402.                  | Comparettia Sotoana (Orchidaceae: Oncidiinae), A New Ecuadorian Species                                                                                                                          | Lankesteriana International Journal on Orchidology                   | Ecuador    |
| 503 | Neotropic | Ramirez Delgadillo & Cupul Magaña1999 | 1999 | Ramírez Delgadillo, R., & Cupul Magaña, F. G.                       | Contribución Al Conocimiento De La Flora De La Bahía De Banderas, Nayarit-Jalisco, México                                                                                                        | Ciencia Ergo-Sum                                                     | México     |
| 504 | Neotropic | Ramirez & Carnevali1999               | 1999 | Ramírez, I. M., & Carnevali, G.                                     | A New Species Of Tillandsia, Some New Records, And A Checklist Of The Bromeliaceae From The Yucatan Peninsula                                                                                    | Harvard Papers in Botany                                             | México     |
| 505 | Neotropic | Ramirez & Mejias2016                  | 2016 | Ramírez, M., & Mejías, A.                                           | Orquídeas De Un Cafetal Bajo Sombra, En El Caserío San José, Parroquia San José De La Montaña, Guanare, Portuguesa, Venezuela                                                                    | Avances de Investigación en Medicina Veterinaria y Producción Animal | Venezuela  |
| 506 | Neotropic | Ramirez Martinez2016                  | 2016 | Ramírez Martínez, A.                                                | Selección De Hábitat Por La Epífita Tillandsia Carlos-Hankii Matuda (Bromeliaceae) En Un Contexto Metapoblacional                                                                                | Tesis Magister                                                       | México     |
| 507 | Neotropic | Ramirez etal.1998                     | 1998 | Ramírez, N., Ochoa, S., González, M., & Quintana, P. F.             | Análisis Florístico Y Sucesional En La Estación Biológica Cerro Huitepec, Chiapas, México                                                                                                        | Acta Botanica Mexicana                                               | México     |
| 508 | Neotropic | Rapp & Silman2014                     | 2014 | Rapp, J., & Silman, M.                                              | Epiphyte Response To Drought And Experimental Warming In An Andean Cloud Forest                                                                                                                  | F1000Research                                                        | Perú       |
| 509 | Neotropic | Reyes & Tutillo2020                   | 2020 | Reyes, A. R., & Tutillo, V. C.                                      | Diversidad De Invertebrados Asociados A Cuatro Especies De Bromelias Y Su Relación Con La Cubierta Vegetal En Dos Zonas Del Kutukú, Parroquia De Sevilla Don Bosco, Provincia De Morona Santiago | Tesis Grado                                                          | Ecuador    |
| 510 | Neotropic | Richards2020                          | 2020 | Richards, J. H.                                                     | Assessing The Strength Of Climate And Land-Use Influences On Montane Epiphyte Communities                                                                                                        | Conservation Biology                                                 | Nicaragua  |

| id      | Region    | Source                                          | Year | Author                                                                                                                                                               | Title                                                                                                                                                                                   | Journal                                        | Country       |
|---------|-----------|-------------------------------------------------|------|----------------------------------------------------------------------------------------------------------------------------------------------------------------------|-----------------------------------------------------------------------------------------------------------------------------------------------------------------------------------------|------------------------------------------------|---------------|
| 51<br>1 | Neotropic | Richards<br>etal.2020                           | 2020 | Richards, J. H., Torrez Luna,<br>I. M., & Waller, D. M.                                                                                                              | Tree Longevity Drives<br>Conservation Value Of<br>Shade Coffee Farms For<br>Vascular Epiphytes                                                                                          | Agriculture,<br>Ecosystems &<br>Environment    | Nicaragu<br>a |
| 51<br>2 | Neotropic | Rios &<br>Cascante2017                          | 2017 | Rios, L., & Cascante, A.                                                                                                                                             | High Selfing Capability And<br>Low Pollinator Visitation In<br>The Hummingbird-<br>Pollinated Epiphyte<br>Pitcairnia Heterophylla<br>(Bromeliaceae) At A Costa<br>Rican Mountain Forest | Revista De<br>Biologia<br>Tropical             | Costa<br>Rica |
| 51<br>3 | Neotropic | Riveron-Giro<br>etal.2016                       | 2016 | Riverón-Giró, F., García<br>González, A., Escalona, R., &<br>Montero, Y.                                                                                             | Inventario Biológico Rápido<br>De Los Helechos Del<br>Elemento Natural Destacado<br>El Yunque De Baracoa, Cuba                                                                          | Revista<br>Cubana de<br>Ciencias<br>Biológicas | Cuba          |
| 51<br>4 | Neotropic | Robles-<br>Molina<br>etal.2018                  | 2018 | Robles-Molina, M.,<br>Martínez-Camilo, R.,<br>Martínez-Meléndez, N., &<br>Farrera, M. A.                                                                             | Diversidad Y Distribución<br>Vertical De Bromeliáceas<br>Epífitas En Un Bosque De<br>Niebla En Chiapas, México                                                                          | Lacadonia                                      | México        |
| 51<br>5 | Neotropic | Rodriguez<br>Camacho &<br>Guerrero<br>Urian2015 | 2015 | Rodríguez Camacho, L. M.,<br>& Guerrero Urian, A. C.                                                                                                                 | Composición Y Diversidad<br>Florística Vascular De<br>Bosque Alto Andino, En El<br>Predio La Chorrera,<br>Municipio Une,<br>Cundinamarca, Colombia                                      | Tesis Grado                                    | Colombia      |
| 51<br>6 | Neotropic | Rodriguez<br>Rodriguez<br>etal.2014             | 2014 | Rodríguez Rodríguez, E. F.,<br>Alvitez Izquierdo, E., Pollack<br>Velásquez, L., Morillo Horna,<br>M., Monzón Licera, K.,<br>Ramírez Obeso, C., . . . Alaya,<br>B. L. | Nuevas Adiciones Para La<br>Flora Orquideológica De La<br>Región La Libertad, Perú                                                                                                      | Sagasteguiana                                  | Perú          |
| 51<br>7 | Neotropic | Rodriguez<br>Sosa<br>etal.2013                  | 2013 | Rodriguez Sosa, J. L., García<br>Quintana, Y., & Aguilar<br>Espinosa, C.                                                                                             | Estructura De La Vegetación<br>De Boque Montano En El<br>Parque Nacional Turquino,<br>Provincia De Granma                                                                               | Revista<br>Cubana de<br>Ciencias<br>Forestales | Cuba          |
| 51<br>8 | Neotropic | Rodriguez-<br>Quiel<br>etal2016                 | 2016 | Rodríguez-Quiel, C., Gómez,<br>D., Rincón, R., & Bader, M.                                                                                                           | Diversidad Y Distribución<br>Vertical De Las Epífitas<br>Vasculares En Un Bosque<br>Montano De La Reserva<br>Forestal Fortuna (Rff),<br>Chiriquí, República De<br>Panamá                | Avances en<br>Investigación                    | Panamá        |
| 51<br>9 | Neotropic | Rodriguez-<br>Quiel<br>etal2017                 | 2017 | Rodríguez-Quiel, C., Gómez<br>González, D. C., & Rincón, R.                                                                                                          | Biodiversidad Del Dosel<br>Montano De La Reserva<br>Forestal Fortuna (Rff):<br>Riqueza Epífita Por Explorar                                                                             | Avances en<br>Investigación                    | Panamá        |
| 52<br>0 | Neotropic | Rodriguez-<br>Quiel &<br>Zotz2021               | 2021 | Rodríguez-Quiel, C., & Zotz,<br>G.                                                                                                                                   | Vascular Epiphyte<br>Assemblages On Isolated<br>Trees Along An Elevational<br>Gradient In Southwest<br>Panama                                                                           | Diversity                                      | Panamá        |
| 52<br>1 | Neotropic | Roger<br>etal.2019                              | 2019 | Roger, E., Palacio, M., Díaz,<br>R., & O'Leary, N.                                                                                                                   | Composición De La Flora<br>Vascular En La Región<br>Noreste De Santiago Del<br>Estero (Argentina)                                                                                       | Caldasía                                       | Argentin<br>a |
| 52<br>2 | Neotropic | Rojas<br>Alvarado2008                           | 2008 | Rojas Alvarado, A.                                                                                                                                                   | Lista De Los Helechos<br>(Pteridophyta) Y Licófitos<br>(Lycopodiophyta) De La<br>Reserva Biológica Alberto<br>Manuel Brenes, Costa Rica                                                 | Mét. Ecol. &<br>Sist.                          | Costa<br>Rica |

| id  | Region    | Source                             | Year | Author                                                                 | Title                                                                                                                                                               | Journal                         | Country     |
|-----|-----------|------------------------------------|------|------------------------------------------------------------------------|---------------------------------------------------------------------------------------------------------------------------------------------------------------------|---------------------------------|-------------|
| 523 | Neotropic | Rojas Alvarez etal.2016            | 2016 | Rojas Álvarez, M., Morales, C. O., & Blanco, M. A.                     | Conservación De Orquídeas En Una Reserva Privada De Palmares, Costa Rica                                                                                            | Cuadernos de Investigación UNED | Costa Rica  |
| 524 | Neotropic | Rojas2017                          | 2017 | Rojas, M. d. P.                                                        | Composición Florística Y Distribución Vertical De Epífitas Vasculares Entre Las Familias Orchidaceae Y Bromeliaceae Del Arboretum "El Huayo", Loreto Perú           | Tesis Grado                     | Perú        |
| 525 | Neotropic | Rojas-Florez & Sanchez-Montaño2015 | 2015 | Rojas-Flórez, C., & Sánchez-Montaño, L.                                | Estructura Espacial De Epífitas Vasculares En Dos Localidades De Bosque Altoandino, Pamplona, Colombia                                                              | Caldasia                        | Colombia    |
| 526 | Neotropic | Rolon2016                          | 2016 | Rolón, C. M. J.                                                        | Claves De Identificación De 14 Géneros De Orquídeas Para La Reserva Natural Del Bosque Mbaracayú, Canindeyú-Paraguay                                                | Rojasiana                       | Paraguay    |
| 527 | Neotropic | Romero-Romero etal.2000            | 2000 | Romero-Romero, M. A., Castillo, S., Meave, J., & van der Wal, H.       | Floristic Analysis Of Secondary Vegetation Derived From The Mountain Rainforest Santa Cruz Tepetotutla (Oaxaca), Mexico                                             | Botanical Sciences              | México      |
| 528 | Neotropic | Rosbotham2014                      | 2014 | Rosbotham, R.                                                          | La Diversidad Y La Densidad De Las Epífitas Vasculares En La Reserva Cerro Candelaria: La Diferencia Entre Las Alturas Y Dos Tipos De Bosque Nublado En Ecuador     | Tesis                           | Ecuador     |
| 529 | Neotropic | Ruales Estupiñan2007               | 2007 | Ruales Estupiñan, C.                                                   | Estudios Para La Recuperación De La Flora Nativa En El Valle De Tumbaco - Distrito Metropolitano De Quito: Inventario Florístico Y Ensayo De Propagación Vegetativa | Tesis Magister                  | Ecuador     |
| 530 | Neotropic | Ruiz2010                           | 2010 | Ruiz, J. Y. S.                                                         | Composición Y Distribución De Plantas Vasculares Epífitas En La Cuenca De Laguna Caldera, San Juan Opico, La Libertad, El Salvador                                  | Tesis Grado                     | El Salvador |
| 531 | Neotropic | Ruiz Macedo2015                    | 2015 | Ruiz Macedo, J. C.                                                     | Estudio De Las Características Florística De La Cuenca Alta Del Río Morona, Datem Del Marañon - Loreto - Perú                                                       | Tesis Grado                     | Perú        |
| 532 | Neotropic | Ruiz Vega etal.2015                | 2015 | Ruiz Vega, R., Esquivel Berrio, C., Salgado Cruz, A., & Saab Ramos, H. | Cátalogo De Epífitas Vasculares Del Sector El Silencio (Parque Nacional Natural Paramillo) Y Zona Amortiguadora, Córdoba, Colombia                                  | Acta Biológica Colombiana       | Colombia    |
| 533 | Neotropic | Ruiz-Contreras2019                 | 2019 | Ruiz-Contreras, J. D.                                                  | Uso De Epífitas Vasculares Por Aves En Un Bosque De Encino En Yanhuatlán, Oaxaca                                                                                    | Tesis Magister                  | México      |

| id  | Region    | Source                                   | Year | Author                                                                                                            | Title                                                                                                                                                                              | Journal                                                            | Country    |
|-----|-----------|------------------------------------------|------|-------------------------------------------------------------------------------------------------------------------|------------------------------------------------------------------------------------------------------------------------------------------------------------------------------------|--------------------------------------------------------------------|------------|
| 534 | Neotropic | Salas Morales etal.2007                  | 2007 | Salas Morales, S. H., Schibli, L., Nava Zafra, A., & Saynes Vásquez, A.                                           | Flora De La Costa De Oaxaca, México (2): Lista Florística Comentada Del Parque Nacional Huatulco                                                                                   | Boletín De La Sociedad Botánica De Mexico                          | México     |
| 535 | Neotropic | Salazar Orellana2017                     | 2017 | Salazar Orellana, M. J.                                                                                           | Estudio Comparativo De La Riqueza De Hongos Endófitos Asociados A La Diversidad De Orquídeas Epífitas En Los Bosques De Mazán Y La Zona De Influencia Del Parque Nacional El Cajas | Tesis Magister                                                     | Ecuador    |
| 536 | Neotropic | San Martín etal.2008                     | 2008 | San Martín, J., Espinosa, A., Zanetti, S., Hauenstein, E., Ojeda, N., & Arriagada, C.                             | Composición Y Estructura De La Vegetación Epífita Vasculare En Un Bosque Primario De Olivillo (Aextoxicon Punctatum R. Et P.) En El Sur De Chile                                   | Ecología Austral                                                   | Chile      |
| 537 | Neotropic | Sanchez Gonzalez etal.2008               | 2008 | Sánchez González, J., Druan Alvarado, F., & Vega Araya, G.                                                        | Diversidad De Plantas, Mamíferos Y Mariposas En Los Cerros De La Carpintera, Costa Rica                                                                                            | Informe Tecnico                                                    | Costa Rica |
| 538 | Neotropic | Sanchez etal.2007                        | 2007 | Sánchez, L. R., Gelviz G, S. M., & Solano Ortega, F.                                                              | Plantas Con Flores De La Reserva El Volcán, Vereda Alto Grande Pamplona, Norte De Santander.                                                                                       | Bistua: Revista de la Facultad de Ciencias Básicas                 | Colombia   |
| 539 | Neotropic | Sanchez Macias & Rodriguez Gutierrez2018 | 2018 | Sánchez Macías, A., & Rodríguez Gutiérrez, K. S.                                                                  | Las Orquídeas Y Su Importancia En El Desarrollo Turístico De La Provincia De Manabí, Ecuador                                                                                       | ECOVIDA                                                            | Ecuador    |
| 540 | Neotropic | Sanin etal.2006                          | 2006 | Sanín, D., Mancera-Santa, J. C., Castaño-Rubiano, N., Alzate-Q., N. F., González-O., G., & Alvarez-M., L. M.      | Catálogo Preliminar De Las Plantas Vasculares De La Reserva Forestal Protectora "Río Blanco" (Manizales, Caldas, Colombia)                                                         | Boletín Científico del Centro de Museos. Museo de Historia Natural | Colombia   |
| 541 | Neotropic | Sanin etal.2014                          | 2014 | Sanín, D., Sierra-Giraldo, J., Posada-Herrera, J., & Ramírez Guapacha, J.                                         | Inventario Florístico De Los Bosques De La Esmeralda, Margen Del Río Cauca (Chichiná, Caldas, Colombia)                                                                            | Boletín Científico del Centro de Museos. Museo de Historia Natural | Colombia   |
| 542 | Neotropic | Santa Cruz Cervera etal.2020             | 2020 | Santa Cruz Cervera, L., Chocce Peña, M. Á., Vega Vera, N. R., Rodríguez Rodríguez, E. F., & Campos de la Cruz, J. | Flora Orquideológica Del Distrito Pulán, Provincia Santa Cruz, Cajamarca, Perú                                                                                                     | Arnaldoa                                                           | Perú       |
| 543 | Neotropic | Santiago2006                             | 2006 | Santiago, A. L.                                                                                                   | Efecto De La Fragmentación En La Diversidad Del Bosque Mesófilo De Montaña, Sierra De Manantlán, México                                                                            | Tesis Magister                                                     | México     |
| 544 | Neotropic | Schmidt etal.2001                        | 2001 | Schmidt, G., Stuntz, S., & Zotz, G.                                                                               | Plant Size: An Ignored Parameter In Epiphyte Ecophysiology?                                                                                                                        | Plant Ecology                                                      | Panama     |
| 545 | Neotropic | Schmidt & Zotz2002                       | 2002 | Schmidt, G., & Zotz, G. (2002). . , 13(4), 527-534.                                                               | Inherently Slow Growth In Two Caribbean Epiphytic                                                                                                                                  | Journal of Vegetation Science                                      | Panama     |

| id  | Region    | Source                         | Year | Author                                                                                                                    | Title                                                                                                                                               | Journal                                  | Country    |
|-----|-----------|--------------------------------|------|---------------------------------------------------------------------------------------------------------------------------|-----------------------------------------------------------------------------------------------------------------------------------------------------|------------------------------------------|------------|
|     |           |                                |      | doi:https://doi.org/10.1111/j.1654-1103.2002.tb02079.x                                                                    | Species: A Demographic Approach                                                                                                                     |                                          |            |
| 546 | Neotropic | Schuettpelz & Trapnell2006     | 2006 | Schuettpelz, E., & Trapnell, D. W.                                                                                        | Exceptional Epiphyte Diversity On A Single Tree In Costa Rica                                                                                       | Selbyana                                 | Costa Rica |
| 547 | Neotropic | Siaz-Torres etal.2021          | 2021 | Siaz-Torres, S. S., Mora-Olivo, A., Arellano-Méndez, L. U., Vanoye-Eligio, V., Flores-Rivas, J., & de la Rosa-Manzano, E. | Contribution Of Peeling Host For Epiphyte Abundance In Two Tropical Dry Forests In The “El Cielo Biosphere Reserve”, Mexico                         | Plant Species Biology                    | México     |
| 548 | Neotropic | Sierra-Giraldo etal.2013       | 2013 | Sierra-Giraldo, J. A., Sanín, D., Coca, L. F., & Posada-Herrera, J. M.                                                    | Araceae In A High Andean Forest Of The Colombian Occidental Cordillera (Natural National Park Tatamá)                                               | Aroideana                                | Colombia   |
| 549 | Neotropic | Silva Saenz & Rivera Ortiz2018 | 2018 | Silva Sáenz, P., & Rivera Ortíz, C. A.                                                                                    | Pteridoflora De “Las Peñas”, Perteneciente A La Localidad De Tendeparacua, Municipio De Huaniqueo, Michoacán, México                                | Ciencia Nicolaita                        | México     |
| 550 | Neotropic | Simba2020                      | 2020 | Simba, J. D.                                                                                                              | Estudio Comparativo De Cinco Especies De Epífitas En Parcelas Permanentes Con Manipulación De Nutrientes En Bosque Montano Al Sur Del Ecuador       | Tesis Grado                              | Ecuador    |
| 551 | Neotropic | Smith etal.2013                | 2013 | Smith, C. M., Jiménez, D., & Pupulin, F. (2013). . , 65(4), 469-476. doi:10.1007/s12228-013-9305-1                        | Lepanthes Variabilis (Orchidaceae: Pleurothallidinae), A New Endemic Species From Costa Rica                                                        | Brittonia                                | Costa Rica |
| 552 | Neotropic | Solano2010                     | 2010 | Solano, R.                                                                                                                | Dos Especies Nuevas De Pleurothallidinae (Orchidaceae) De México                                                                                    | Lankesteriana                            | México     |
| 553 | Neotropic | Solis-Montero etal.2019        | 2019 | Solis-Montero, L., Quintana-Palacios, V., & Damon, A.                                                                     | Impact Of Moss And Epiphyte Removal On Coffee Production And Implications For Epiphyte Conservation In Shade Coffee Plantations In Southeast Mexico | Agroecology and Sustainable Food Systems | México     |
| 554 | Neotropic | Standleyi1927                  | 1927 | Standley, P. G.                                                                                                           | The Flora Of Barro Colorado Island, Panama                                                                                                          | Libro                                    | Panama     |
| 555 | Neotropic | Steege & Cornelissen1989       | 1989 | Steege, H. t., & Cornelissen, J. H. C.                                                                                    | Distribution And Ecology Of Vascular Epiphytes In Lowland Rain Forest Of Guyana                                                                     | Biotropica                               | Guyana     |
| 556 | Neotropic | Stuntz2001                     | 2001 | Stuntz, S.                                                                                                                | The Influence Of Epiphytes On Arthropods In The Tropical Forest Canopy                                                                              | Tesis Grado                              | Panama     |
| 557 | Neotropic | Stuntz etal.2003               | 2003 | Stuntz, S., Linder, C., Linsemaier, K. E., Simon, U., & Zotz, G.                                                          | Do Non-Myrmecophilic Epiphytes Influence Community Structure Of Arboreal Ants?                                                                      | Basic and Applied Ecology                | Panama     |
| 558 | Neotropic | Stuntz etal.2002               | 2002 | Stuntz, S., Ziegler, C., Simon, U., & Zotz, G.                                                                            | Diversity And Structure Of The Arthropod Fauna Within Three Canopy Epiphyte Species In Central Panama                                               | Journal of Tropical Ecology              | Panama     |
| 559 | Neotropic | Stuntz & Zotz2001              | 2001 | Stuntz, S., & Zotz, G.                                                                                                    | Photosynthesis in vascular epiphytes: A survey of 27 species of diverse taxonomic origin                                                            | Flora                                    | Panama     |

| id  | Region    | Source                  | Year | Author                                                                                      | Title                                                                                                                                                                                        | Journal                               | Country    |
|-----|-----------|-------------------------|------|---------------------------------------------------------------------------------------------|----------------------------------------------------------------------------------------------------------------------------------------------------------------------------------------------|---------------------------------------|------------|
| 560 | Neotropic | Sugden & Robins1979     | 1979 | Sugden, A. M., & Robins, R. J.                                                              | Aspects of the Ecology of Vascular Epiphytes in Colombian Cloud Forests, I. The Distribution of the Epiphytic Flora                                                                          | Biotropica                            | Colombia   |
| 561 | Neotropic | Sylvester etal.2014     | 2014 | Sylvester, S. P., Sylvester, M. D. P. V., & Kessler, M.                                     | The World's Highest Vascular Epiphytes Found In The Peruvian Andes                                                                                                                           | Alpine Botany                         | Perú       |
| 562 | Neotropic | Tadri2011               | 2011 | Tadri, G.                                                                                   | Vegetación Vascular De La Reserva Natural Bojonawi (Vichada, Colombia): Aportes Para La Elaboración De Su Flórula                                                                            | Tesis Grado                           | Colombia   |
| 563 | Neotropic | Taylor2016              | 2016 | Taylor, A.                                                                                  | Vascular epiphyte assemblage structure and distribution patterns in the south-temperate zone                                                                                                 | Tesis Doctor                          | Chile      |
| 564 | Neotropic | Toledo-Aceves etal.2013 | 2013 | Toledo-Aceves, T., Mehltreter, K., García-Franco, J. G., Hernández-Rojas, A., & Sosa, V. J. | Benefits and costs of epiphyte management in shade coffee plantations                                                                                                                        | Agriculture, Ecosystems & Environment | México     |
| 565 | Neotropic | Torre Robles2009        | 2009 | Torres Robles, S. S.                                                                        | Variación geográfica de la composición y riqueza de plantas vasculares en los talares bonaerenses y su relación con el clima, sustrato, estructura del paisaje y uso                         | Tesis Doctor                          | Argentina  |
| 566 | Neotropic | Trapnell & Hamrick2006  | 2006 | Trapnell, D. W., & Hamrick, J. L.                                                           | Variety of Phorophyte Species Colonized by the Neotropical Epiphyte, <i>Laelia rubescens</i> (Orchidaceae)                                                                                   | Selbyana                              | Costa Rica |
| 567 | Neotropic | Triana-Moreno etal.2003 | 2003 | Triana-Moreno, L. A., Garzón-Venegas, N. J., Sánchez-Zambrano, J., & Vargas, O.             | Epifitas vasculares como indicadores de regeneración en bosques intervenidos de la Amazonía colombiana                                                                                       | Acta Biológica Colombiana             | Colombia   |
| 568 | Neotropic | Trujillo2019            | 2019 | Trujillo, S. I.                                                                             | Caracterización de la composición y estructura de macroinvertebrados acuáticos en la fitotelma de bromelias epífitas en la Estación Científica Timburi-Cocha (San José de Payamino-Orellana) | Tesis Grado                           | Ecuador    |
| 569 | Neotropic | Trusty & Blanco2005     | 2005 | Trusty, J., & Blanco, M. A.                                                                 | Las orquídeas de la Isla del Coco                                                                                                                                                            | Epidendrum                            | Costa Rica |
| 570 | Neotropic | Valdez Poron2012        | 2012 | Valdez Porón, J. C.                                                                         | Análisis De La Riqueza Florística Del Bosque Seco De La Finca San Miguel, Municipio De Sanarate, El Progreso, Guatemala .C. A.                                                               | Tesis Grado                           | Guatemala  |
| 571 | Neotropic | Valebella & Sager2010   | 2010 | Valebella, M., & Sager, M.                                                                  | Oncidium Hians (Orchidaceae), Nueva Especie Para La Flora De Argentina                                                                                                                       | Bonplandia                            | Argentina  |
| 572 | Neotropic | Valencia2013            | 2013 | Valencia, A.                                                                                | Evaluación Del Traslado De Epifitas Vasculares, Como Estrategia De Conservación En Municipio De Agua Azul, Departamento Del Casanare (Estudio Preliminar)                                    | Tesis Magister                        | Colombia   |

| id  | Region    | Source                         | Year | Author                                                                                                                                               | Title                                                                                                                                                                                     | Journal                    | Country    |
|-----|-----------|--------------------------------|------|------------------------------------------------------------------------------------------------------------------------------------------------------|-------------------------------------------------------------------------------------------------------------------------------------------------------------------------------------------|----------------------------|------------|
| 573 | Neotropic | Vallejo-Mayo & Rivera-Diaz2021 | 2021 | Vallejo-Mayo, L. Y., & Rivera-Díaz, O.                                                                                                               | Inventario Florístico En Áreas De Bosque Andino De La Cordillera Central De Colombia (El Peñol, Antioquia)                                                                                | Caldasia                   | Colombia   |
| 574 | Neotropic | Varela Romero & Artigas2014    | 2014 | Varela Romero, C., & Artigas, M.                                                                                                                     | Estado Actual Del Conocimiento De La Flora Vascul ar Del Estado Carabobo, Venezuela                                                                                                       | Ernstia                    | Venezuela  |
| 575 | Neotropic | Vargas etal.2000               | 2000 | Vargas, H., Neill, D., Asanza, M., Freire-Fierro, A., & Narváez, E.                                                                                  | Vegetación Y Flora Del Parque Nacional Llanganates                                                                                                                                        | Informe Tecnico            | Ecuador    |
| 576 | Neotropic | Vega etal.2014                 | 2014 | Vega, H., Cetzal Ix, W., Mó, E., & Romero-Soler, K.                                                                                                  | Nuevos Registros De Orchidaceae Para Honduras                                                                                                                                             | Lankesteriana              | Honduras   |
| 577 | Neotropic | Vega etal.2016                 | 2016 | Vega, H., Cetzal-Ix, W., Mó, E., & Romero-Soler, K.                                                                                                  | Nuevos registros para la flora de Honduras y el Parque Nacional Montaña de Celaque                                                                                                        | Acta Biológica Colombiana  | Honduras   |
| 578 | Neotropic | Vega2007                       | 2007 | Vega, M.                                                                                                                                             | Composición Florística y Estructura de las Comunidades de Plantas Epífitas en Tres Tipos de Bosques de la Cuenca Baja del Río Los Amigos: Provincia de Manu–Departamento de Madre de Dios | Tesis Grado                | Perú       |
| 579 | Neotropic | Vera etal.2019                 | 2019 | Vera, A., Pacheco, D., Barboza, F., Jiménez, L., Morillo Diaz, G., & Balaguera, Y.                                                                   | Flora De La Isleta El Hicacal, Reserva De Fauna Silvestre Ciénaga De La Palmita E Isla De Pájaros, Venezuela                                                                              | REDIELUZ                   | Venezuela  |
| 580 | Neotropic | Vera2017                       | 2017 | Vera, F. P.                                                                                                                                          | Rescate Y Reubicación De Especies Epífitas Como Medida De Conservación En Un Bosque Húmedo Tropical Con Bambú De Montaña                                                                  | Tesis Grado                | Perú       |
| 581 | Neotropic | Vergara Impellizzeri2013       | 2013 | Vergara Impellizzeri, N. A.                                                                                                                          | Importancia del suelo arbóreo para los helechos película (Hymenophyllaceae) en el dosel del bosque templado lluvioso de Chile                                                             | Tesis Grado                | Chile      |
| 582 | Neotropic | Victoria2009                   | 2009 | Victoria, N. V.                                                                                                                                      | Distribución de epífitas vasculares a lo largo de un gradiente altitudinal en Santa Catarina Ixtepeji, Oaxaca                                                                             | Tesis Magister             | México     |
| 583 | Neotropic | Victoriano-Romero etal.2020    | 2020 | Victoriano-Romero, E., García-Franco, J. G., Mehlreter, K., Valencia-Díaz, S., Toledo-Hernández, V. H., & Flores-Palacios, A.                        | Epiphyte associations and canopy soil volume: nutrient capital and factors influencing soil retention in the canopy                                                                       | Plant Biology              | México     |
| 584 | Neotropic | Villate Gomez etal.2016        | 2016 | Villate Gomez, M., Perez Camacho, J., Ricardo Napoles, N. E., Herrera Oliver, P. P., Vento Vento, A. D., Gonzales Pendas, E., . . . Acosta Ramos, Z. | Actualización de la flora en la Reserva Florística Manejada San Ubaldo-Sabanalamar, Pinar del Río, Cuba                                                                                   | Acta Botanica Cubana       | Cuba       |
| 585 | Neotropic | Watkins etal.2006              | 2006 | Watkins Jr, J. E., Cardelús, C., Colwell, R. K., & Moran, R. C.                                                                                      | Species richness and distribution of ferns along an elevational gradient in Costa Rica                                                                                                    | American Journal of Botany | Costa Rica |

| id  | Region    | Source                     | Year | Author                                                          | Title                                                                                                           | Journal                                                                               | Country    |
|-----|-----------|----------------------------|------|-----------------------------------------------------------------|-----------------------------------------------------------------------------------------------------------------|---------------------------------------------------------------------------------------|------------|
| 586 | Neotropic | Watkins et al.2007         | 2007 | Watkins Jr, J. E., Mack, M. K., & Mulkey, S. S.                 | Gametophyte ecology and demography of epiphytic and terrestrial tropical ferns                                  | American Journal of Botany                                                            | Costa Rica |
| 587 | Neotropic | Welander2002               | 2002 | Welander, I. D.                                                 | Associations and Assembly Rules of a Vascular Epiphyte Community in Monteverde, Costa Rica                      | -                                                                                     | Costa Rica |
| 588 | Neotropic | Werner2007                 | 2007 | Werner, F.                                                      | Effects Of Human Disturbance On Diversity And Ecology Of Vascular Epiphyte Assemblages In The Andes Of Ecuador  | Tesis Doctor                                                                          | Ecuador    |
| 589 | Neotropic | Wilchez Alvarez2017        | 2017 | Wilches Álvarez, W.                                             | Diversidad Y Expresión Fenológica De Especies Epifitas En El Municipio De Puerto Lleras, Meta                   | Conexión Agropecuaria JDC                                                             | Colombia   |
| 590 | Neotropic | Williams-Linera et al.1995 | 1995 | Williams-Linera, G., Sosa, V., & Platas, T.                     | The Fate Of Epiphytic Orchids After Fragmentation Of A Mexican Cloud Forest                                     | Selbyana                                                                              | México     |
| 591 | Neotropic | Wolf1993a                  | 1993 | Wolf, J.                                                        | Epiphyte communities of tropical montane rain forest in the northern Andes. I. Lower montane communities        | Phytocoenologia                                                                       | Colombia   |
| 592 | Neotropic | Wolf1993b                  | 1993 | Wolf, J.                                                        | Epiphyte communities of tropical montane rain forest in thenorthern Andes. II. Upper montane communities        | Phytocoenologia                                                                       | Colombia   |
| 593 | Neotropic | Wolf & Flamenco-S2006      | 2006 | Wolf, J., & Flamenco-S, A.                                      | Vascular Epiphytes and Their Potential as a Conservation Tool in Pine-Oak Forests of Chiapas, Mexico            | Capitulo Libro                                                                        | México     |
| 594 | Neotropic | Wolf1994                   | 1994 | Wolf, J. H. D.                                                  | Factors controlling the distribution of vascular and non-vascular epiphytes in the northern Andes               | Vegetatio                                                                             | Colombia   |
| 595 | Neotropic | Woods2013                  | 2013 | Woods, C. L.                                                    | Factors Influencing the Distribution and Structure of Tropical Vascular Epiphyte Communities at Multiple Scales | Tesis Doctor                                                                          | Panama     |
| 596 | Neotropic | Woods & DeWalt2013         | 2013 | Woods, C. L., & DeWalt, S. J.                                   | The Conservation Value of Secondary Forests for Vascular Epiphytes in Central Panama                            | Biotropica                                                                            | Panama     |
| 597 | Neotropic | Yanoviak et al.2011        | 2011 | Yanoviak, S. P., Berghoff, S. M., Linsenmair, K. E., & Zotz, G. | Effects Of An Epiphytic Orchid On Arboreal Ant Community Structure In Panama                                    | Biotropica                                                                            | Panama     |
| 598 | Neotropic | Young & Leon1990           | 1990 | Young, K., & León, B.                                           | Catalogo De Las Plantas De La Zona Alta Del Parque Nacional Rio Abiseo, Perú                                    | Publicaciones del Museo de Historia Natural, Universidad Nacional Mayor de San Marcos | Perú       |
| 599 | Neotropic | Young & Leon1989           | 1989 | Young, K. R., & León, B.                                        | Pteridophyte species diversity in the central Peruvian Amazon: Importance of edaphic specialization             | Brittonia                                                                             | Perú       |

| id  | Region    | Source                              | Year | Author                                                                  | Title                                                                                                                                                                    | Journal                       | Country   |
|-----|-----------|-------------------------------------|------|-------------------------------------------------------------------------|--------------------------------------------------------------------------------------------------------------------------------------------------------------------------|-------------------------------|-----------|
| 600 | Neotropic | Zanotti et al.2020                  | 2020 | Zanotti, C., Keller, H., & Zuloaga, F.                                  | Biodiversidad de la flora vascular de la provincia de Misiones, Región Paranaense, Argentina                                                                             | Darwiniana                    | Argentina |
| 601 | Neotropic | Zapata2019                          | 2019 | Zapata, J. N.                                                           | Composición y estructura de epífitas vasculares en un gradiente altitudinal en un Bosque Montano Alto, Imbabura, Ecuador                                                 | Tesis Grado                   | Ecuador   |
| 602 | Neotropic | Zavala Molina2002                   | 2002 | Zavala Molina, S. V. (2002). . Escuela Agrícola Panamericana, Honduras. | Inventario de bromelias epífitas del bosque nebuloso de la montaña El Volcán, El Paraíso, Honduras                                                                       | Tesis Grado                   | Honduras  |
| 603 | Neotropic | Zepeda Gomez & Velazquez Montes1999 | 1999 | Zepeda Gómez, C., & Velázquez Montes, E.                                | El bosque tropical caducifolio de la vertiente sur de la sierra de Nanchititla, Estado de México: la composición y la afinidad geográfica de su flora                    | Acta Botanica Mexicana        | México    |
| 604 | Neotropic | Zipp et al.2003                     | 2003 | Zipp, D., Schneider, J. V., Gaviria, J., & Zizka, G.                    | Variación morfológica de una población de Tillandsia biflora Ruiz & Pav. (Bromeliaceae) en un bosque altoandino de Venezuela (La Caña, Valle de San Javier, Edo. Mérida) | Plantula                      | Venezuela |
| 605 | Neotropic | Zotz2007                            | 2007 | Zotz, G.                                                                | Johansson revisited: the spatial structure of epiphyte assemblages                                                                                                       | Journal of Vegetation Science | Panama    |
| 606 | Neotropic | Zotz & Bader2011                    | 2011 | Zotz, G., & Bader, M.                                                   | Sampling vascular epiphyte diversity - Species richness and community structure                                                                                          | Ecotropica                    | Panama    |
| 607 | Neotropic | Zotz & Thomas1999                   | 1999 | Zotz, G., & Thomas, V.                                                  | How Much Water is in the Tank? Model Calculations for Two Epiphytic Bromeliads                                                                                           | Annals of Botany              | Panama    |
| 608 | Neotropic | Zotz & Ziegler1997                  | 1997 | Zotz, G., & Ziegler, H.                                                 | The occurrence of crassulacean acid metabolism among vascular epiphytes from Central Panama                                                                              | New Phytologist               | Panama    |

Table S2. List of data sources.

**Notes:** the occurrences file (embargoed, provided per request) is the file with all occurrence records used for the analyses of the present paper and it includes 65 columns following the Darwin Core Standard (DwC) about the Occurrence, the Identification, the Taxon, the Event, the Location, the Material sampled, and some IRI-value terms. Some relevant columns that are not in DwC are (1) the database\_id: the data source name followed by a consecutive number, (2) source: it is the contributor of the database, see following table for details, (3) prevScientificName, prevFullName, prevGenus, prevEpithet, prevFamily, prevOrder: taxonomic information following the DwC names with the prefix “prev” indicating that this were the names of the taxon’s record in the original database source. The updated taxonomic information (accepted names) is in the columns "family", "order", "genus", "specificEpithet" and "species". It only includes accepted names at species level and excludes names in higher (e.g., genus, family, morphospecies) and lower (e.g., varieties, subspecies) taxonomic categories, (4) references: it is the citation of the record’s reference used for original data gathering contributor.

There were 16 contributors of the complete database (hereinafter, sources), with a total contribution of 2,078,540 records that lead to 1,892,483 records within the Neotropical region. After the cleaning process (see manuscript), we retained 581,848 records of 11,444 epiphyte species, as shown in the following table (see the manuscript for references):

| id | Database name        | Source                                            | # of records (# of species) | Details                                                                                                                                                                                                                                                                                                                                                |
|----|----------------------|---------------------------------------------------|-----------------------------|--------------------------------------------------------------------------------------------------------------------------------------------------------------------------------------------------------------------------------------------------------------------------------------------------------------------------------------------------------|
| 1  | Araceae of the World | Alejandro Zuluaga, unpublished data               | 23,740 (603)                | The archive of records includes the Colombian herbaria FMB, COL, HUA, CUVC, COAH, and almost all MO records of the Araceae family, until October 2 <sup>nd</sup> , 2021. Also includes other records from different databases such as GBIF (although, the most important gap is Brazil). CoordinateCleaner (v. 2.0-20) flagged records were discarded. |
| 2  | Atlantic Epiphytes   | Atlantic Epiphytes (Ramos et al., 2019)           | 36,537 (1,443)              | The database of Atlantic Epiphytes includes information grouped from different sources (articles, books, theses, and herbarium data) and has records for both vascular and non-vascular epiphytes. It does not include GBIF records since they were added to the GBIF source per family. Data were shared on February 23 <sup>rd</sup> , 2021.         |
| 3  | Biovera              | Biovera-Epi (Guzmán-Jacob et al., 2021)           | 748 (122)                   | Guzmán-Jacob, V., Weigelt, P., Craven, D., Zotz, G., Krömer, T., & Kreft, H. (2021) is a data paper that describes a new, comprehensive database on species diversity, community composition and leaf functional traits of vascular epiphytes along gradients of elevation and forest-use intensity in Mexico.                                         |
| 4  | bromeliad            | “bromeliad” package v. 1.0-3 (Zizka et al., 2019) | 42,795 (1,219)              | This data comes from "Zizka A, Azevedo J, Leme E, Neves B, Costa AFC, Caceres D & Zizka, G (2019) Biogeography and conservation status of the pineapple family (Bromeliaceae). Diversity and Distributions, 26(2):183-195. DOI:10.1111/ddi.13004."                                                                                                     |
| 5  | Data-from-papers     | Data from literature                              | 10,363 (3,063)              | See <b>SM1</b> of the present document for further details.                                                                                                                                                                                                                                                                                            |

| id | Database name             | Source                                                                                      | # of records (# of species) | Details                                                                                                                                                                                                                                                                                                                                                                                                                                                                                                                                                                                                                                     |
|----|---------------------------|---------------------------------------------------------------------------------------------|-----------------------------|---------------------------------------------------------------------------------------------------------------------------------------------------------------------------------------------------------------------------------------------------------------------------------------------------------------------------------------------------------------------------------------------------------------------------------------------------------------------------------------------------------------------------------------------------------------------------------------------------------------------------------------------|
| 6  | Dry diagonal forest       | Data from the South American Dry Diagonal Forest Epiphytes (Flavio Ramos, unpublished data) | 16,316 (688)                | The South American Dry Diagonal Forest Epiphytes database has data from GBIF and Specieslink for the dry diagonal of South America (Caatinga, Cerrado, Pantanal and Chaco). Names were corrected to the list by Zotz et al. (2021) and FLORA do Brasil 2020 ( <a href="http://floradobrasil.jbrj.gov.br/reflora/listaBrasil/PrincipalUC/PrincipalUC.do#CondicaoTaxonCP">http://floradobrasil.jbrj.gov.br/reflora/listaBrasil/PrincipalUC/PrincipalUC.do#CondicaoTaxonCP</a> ), the official Brazilian list of plants. Original database included registers from Brazil, Argentina, Uruguay, and Paraguay obtained until October 18th, 2021. |
| 7  | Epiamazonia               | Amazonian Epiphytes (Araujo et al., 2022)                                                   | 52,776 (3,802)              | It has data on Amazonian vascular epiphytes from GBIF and from Specieslink ( <a href="http://www.splink.org.br/index?lang=pt">http://www.splink.org.br/index?lang=pt</a> ), a database from Brazil. The names were previously cleaned and corrected according to the EpiList of Zotz et al. (2021). Data were shared on February 23 <sup>rd</sup> , 2021.                                                                                                                                                                                                                                                                                   |
| 8  | EpIG                      | Epiphyte Inventory Group database (EpIG-DB v. 1, Mendieta-Leiva et al., 2020)               | 121,689 (1,275)             | Epiphyte Inventory Group database with records collected until July 28 <sup>th</sup> , 2021. Morphospecies were deleted.                                                                                                                                                                                                                                                                                                                                                                                                                                                                                                                    |
| 9  | gbif                      | <a href="https://www.gbif.org/">https://www.gbif.org/</a> (GBIF, 2022)                      | 206,322 (7,617)             | Data from the Geographic Biodiversity Information facility was downloaded using the “rgbif” package (v. 3.7.2) with “taxize” (v. 0.9.10) using the <i>get_gbifid_</i> and <i>occ_download</i> functions, to get the GBIF ID and to create a downloadable csv file in the GBIF author profile for a posterior use. The files were created using the family name and constraining the search for a polygon within the coordinates: (-116 32, -116 -60, -33 -60, -33 32, -116 32). Data was downloaded between August and September of 2021.                                                                                                   |
| 10 | iNaturalist               | <a href="http://inaturalist.org/">http://inaturalist.org/</a>                               | 643 (24)                    | Data downloaded with the package “iNatTools” v. 0.1.3 with the <i>iNat</i> function. It only includes records at “research grade”. The csv was manually post-processed in Excel and Qgis, to be sure I get only data with coordinates, in the Neotropics, of native species, not captive species, and with <code>identifications_most_agree = TRUE</code> .                                                                                                                                                                                                                                                                                 |
| 11 | NYBG-Specieslink          | Other online sources (unpublished) include data from specieslink and the NYBG               | 36,674 (2,677)              | It includes specieslink, and NYBG (New York Botanical Garden herbarium) data.                                                                                                                                                                                                                                                                                                                                                                                                                                                                                                                                                               |
| 12 | Polypodiaceae of America  | Michael Kessler, unpublished data                                                           | 3,801 (273)                 | The archive of records includes records of the Polypodiaceae family of 16 countries and 240 collectors.                                                                                                                                                                                                                                                                                                                                                                                                                                                                                                                                     |
| 13 | Polypodiaceae of Honduras | Michael Kessler, unpublished data                                                           | 32 (32)                     | The archive of records includes the records of the Polypodiaceae family collected by J. Reyes-Chavez in the Parque Nacional Montaña de Celaque in Honduras.                                                                                                                                                                                                                                                                                                                                                                                                                                                                                 |
| 14 | SEL                       | Marie Selby Botanical Gardens herbariums data                                               | 23,020 (5,329)              | It includes specimens’ data from Marie Selby Botanical Gardens herbarium data shared in March 2022                                                                                                                                                                                                                                                                                                                                                                                                                                                                                                                                          |
| 15 | SMC_epiphytes             | Sierra Madre of Chiapas epiphytes (Jiménez-López et al., in prep.)                          | 2,394 (356)                 | It corresponds to the epiphytes of the Sierra Madre de Chiapas (Mexico) and the original database includes 9,385 records and 645 species, only true epiphytes, until October 5 <sup>th</sup> , 2021. The name standardization was performed with “Taxonstand” and                                                                                                                                                                                                                                                                                                                                                                           |

| id | Database name | Source                                                  | # of records (# of species) | Details                                                                                                                                                                                                                                   |
|----|---------------|---------------------------------------------------------|-----------------------------|-------------------------------------------------------------------------------------------------------------------------------------------------------------------------------------------------------------------------------------------|
|    |               |                                                         |                             | updated according to the Checklist of the native vascular plants of Mexico (Villaseñor, 2016). It is a highly taxonomic curated database; it does not include duplicates and georeferencing errors were removed with "CoordinateCleaner". |
| 16 | Usumacinta    | Usumacinta river basin flora (Jiménez-López, submitted) | 3,998 (574)                 | This database corresponds to the herb/epiphytic species of the Usumacinta River basin (Mexico), includes 36,634 records and 3,833 species, and does not contain duplicates.                                                               |

*Table S3. Reviewed EpiList*

See in Excel file “TS3\_EpiList reviewed.xlsx”. For Orchidaceae, Bromeliaceae, and Polypodiaceae, there are only species names originally on EpiList. For Araceae, it includes the modified EpiList for the family proposed by the specialist Alejandro Zuluaga (unpublished data, see the column *source*). For Piperaceae, we used EpiList together with the epiphytic species reported in Flora Mesoamericana (Callejas, 2020), and two other recent publications of epiphytic species in the family (Jimeno-Sevilla et al., 2018; Vergara-Rodríguez et al., 2017). Scientific names were standardized with the package for R “LCVP v. 1.0.3” (Freiberg et al., 2020). The final species list includes **26,063** accepted species names from EpiList.

*Table S4. Automated assessment results per species.*

See Excel file “TS4\_Automated\_assessment.xlsx”. It includes **11,446 species** with the following information: (1) family: taxonomic family, (2) genus, (3) taxa: species scientific name, (4) EOO: extent of occurrence, (5) AOO: area of occurrence, (6) Nbe\_unique\_occ.: number of unique occurrences, (7) Nbe\_subPop: number of subpopulations, (8) Nbe\_loc: number of locations, (9) Nbe\_loc\_PA: number of locations in protected areas, (9) Category\_CriteriaB: risk category according with the IUCN guidelines, (10) Category\_code: codification of the subcriteria and conditions applied to assign the risk category, (11) Ratio\_occ\_within\_PA: proportion of occurrences within the protected areas, (12) Category\_AOO: risk category according with the IUCN guidelines if only the sub criterion AOO is applied, and (13) Category\_EOO: risk category according with the IUCN guidelines if only the sub criterion EOO is applied.

Table S5. Category IUCN Red List.

It includes the following information: (1) taxonid, (2) family, (3) scientific\_name, (4) authority, (5) published\_year, (6) assessment\_date, (7) category, (8) criteria, (9) assessor and (10) reviewer.

| taxonid      | family  | scientific_name                        | authority            | published_year | assessment_date | category | criteria | assessor                         | reviewer                                                                                                                      |
|--------------|---------|----------------------------------------|----------------------|----------------|-----------------|----------|----------|----------------------------------|-------------------------------------------------------------------------------------------------------------------------------|
| 4439<br>3271 | ARACEAE | <i>Anthurium<br/>alatipedunculatum</i> | Croat &<br>R.A.Baker | 2013           | 21/07/08        | LC       | NA       | Crook, V.                        | Scott, J.A.                                                                                                                   |
| 4286<br>0    | ARACEAE | <i>Anthurium<br/>albidum</i>           | Sodiro               | 2003           | 30/04/03        | DD       | NA       | Benavides,<br>G. &<br>Pitman, N. | Valencia,<br>R., Pitman,<br>N., Leon-<br>Yanez, S.<br>&<br>Jorgensen,<br>P.M.<br>(Ecuador<br>Plants Red<br>List<br>Authority) |
| 4286<br>1    | ARACEAE | <i>Anthurium<br/>albispatha</i>        | Sodiro               | 2003           | 30/04/03        | DD       | NA       | Benavides,<br>G. &<br>Pitman, N. | Valencia,<br>R., Pitman,<br>N., Leon-<br>Yanez, S.<br>&<br>Jorgensen,<br>P.M.<br>(Ecuador<br>Plants Red<br>List<br>Authority) |
| 4286<br>2    | ARACEAE | <i>Anthurium<br/>albovirescens</i>     | Sodiro               | 2003           | 30/04/03        | VU       | D2       | Benavides,<br>G. &<br>Pitman, N. | Valencia,<br>R., Pitman,<br>N., Leon-<br>Yanez, S.<br>&<br>Jorgensen,<br>P.M.<br>(Ecuador<br>Plants Red<br>List<br>Authority) |
| 4286<br>4    | ARACEAE | <i>Anthurium<br/>angustilaminatum</i>  | Engl.                | 2003           | 30/04/03        | NT       | NA       | Benavides,<br>G. &<br>Pitman, N. | Valencia,<br>R., Pitman,<br>N., Leon-<br>Yanez, S.<br>&<br>Jorgensen,<br>P.M.<br>(Ecuador<br>Plants Red<br>List<br>Authority) |
| 4286<br>5    | ARACEAE | <i>Anthurium<br/>aristatum</i>         | Sodiro               | 2003           | 30/04/03        | NT       | NA       | Benavides,<br>G. &<br>Pitman, N. | Valencia,<br>R., Pitman,<br>N., Leon-<br>Yanez, S.<br>&<br>Jorgensen,<br>P.M.<br>(Ecuador<br>Plants Red<br>List<br>Authority) |
| 4286<br>7    | ARACEAE | <i>Anthurium<br/>auritum</i>           | Sodiro               | 2003           | 30/04/03        | VU       | D2       | Benavides,<br>G. &<br>Pitman, N. | Valencia,<br>R., Pitman,<br>N., Leon-                                                                                         |

| taxonid  | family  | scientific_name               | authority        | published_year | assessment_date | category | criteria  | assessor                       | reviewer                                                                                       |
|----------|---------|-------------------------------|------------------|----------------|-----------------|----------|-----------|--------------------------------|------------------------------------------------------------------------------------------------|
|          |         |                               |                  |                |                 |          |           |                                | Yanez, S. & Jorgensen, P.M. (Ecuador Plants Red List Authority)                                |
| 44392602 | ARACEAE | <i>Anthurium bonplandii</i>   | G.S.Bunting      | 2013           | 18/12/09        | LC       | NA        | Crook, V. & Romand-Monnier, F. | Scott, J.A.                                                                                    |
| 42870    | ARACEAE | <i>Anthurium brittonianum</i> | Sodiro           | 2003           | 30/04/03        | DD       | NA        | Benavides, G. & Pitman, N.     | Valencia, R., Pitman, N., Leon-Yanez, S. & Jorgensen, P.M. (Ecuador Plants Red List Authority) |
| 42871    | ARACEAE | <i>Anthurium buccayanum</i>   | Croat            | 2003           | 30/04/03        | EN       | A4c       | Benavides, G. & Pitman, N.     | Valencia, R., Pitman, N., Leon-Yanez, S. & Jorgensen, P.M. (Ecuador Plants Red List Authority) |
| 42872    | ARACEAE | <i>Anthurium bulbosum</i>     | Sodiro           | 2003           | 30/04/03        | VU       | D2        | Benavides, G. & Pitman, N.     | Valencia, R., Pitman, N., Leon-Yanez, S. & Jorgensen, P.M. (Ecuador Plants Red List Authority) |
| 42873    | ARACEAE | <i>Anthurium bushii</i>       | Croat            | 2003           | 30/04/03        | EN       | B1ab(iii) | Benavides, G. & Pitman, N.     | Valencia, R., Pitman, N., Leon-Yanez, S. & Jorgensen, P.M. (Ecuador Plants Red List Authority) |
| 42874    | ARACEAE | <i>Anthurium cabuyalense</i>  | Croat & Rodr. J. | 2003           | 30/04/03        | VU       | D2        | Benavides, G. & Pitman, N.     | Valencia, R., Pitman, N., Leon-Yanez, S. & Jorgensen, P.M. (Ecuador Plants Red List Authority) |
| 42875    | ARACEAE | <i>Anthurium cachabianum</i>  | Sodiro           | 2003           | 30/04/03        | DD       | NA        | Benavides, G. & Pitman, N.     | Valencia, R., Pitman, N., Leon-                                                                |

| taxo<br>nid  | family  | scientific_<br>name                | authority  | published_<br>year | assessment<br>_date | category | criteria  | assessor                         | reviewer                                                                                                                      |
|--------------|---------|------------------------------------|------------|--------------------|---------------------|----------|-----------|----------------------------------|-------------------------------------------------------------------------------------------------------------------------------|
|              |         |                                    |            |                    |                     |          |           |                                  | Yanez, S.<br>&<br>Jorgensen,<br>P.M.<br>(Ecuador<br>Plants Red<br>List<br>Authority)                                          |
| 4439<br>2182 | ARACEAE | <i>Anthurium<br/>caloveboranum</i> | Croat      | 2013               | 24/10/08            | VU       | B1ab(iii) | Crook, V.                        | Scott, J.A.                                                                                                                   |
| 4287<br>6    | ARACEAE | <i>Anthurium<br/>campii</i>        | Croat      | 2003               | 30/04/03            | NT       | NA        | Benavides,<br>G. &<br>Pitman, N. | Valencia,<br>R., Pitman,<br>N., Leon-<br>Yanez, S.<br>&<br>Jorgensen,<br>P.M.<br>(Ecuador<br>Plants Red<br>List<br>Authority) |
| 4287<br>7    | ARACEAE | <i>Anthurium<br/>camposii</i>      | Sodiro     | 2003               | 30/04/03            | DD       | NA        | Benavides,<br>G. &<br>Pitman, N. | Valencia,<br>R., Pitman,<br>N., Leon-<br>Yanez, S.<br>&<br>Jorgensen,<br>P.M.<br>(Ecuador<br>Plants Red<br>List<br>Authority) |
| 4287<br>8    | ARACEAE | <i>Anthurium<br/>canaliculatum</i> | Sodiro     | 2003               | 30/04/03            | DD       | NA        | Benavides,<br>G. &<br>Pitman, N. | Valencia,<br>R., Pitman,<br>N., Leon-<br>Yanez, S.<br>&<br>Jorgensen,<br>P.M.<br>(Ecuador<br>Plants Red<br>List<br>Authority) |
| 4288<br>3    | ARACEAE | <i>Anthurium<br/>conspicuum</i>    | Sodiro     | 2003               | 30/04/03            | DD       | NA        | Benavides,<br>G. &<br>Pitman, N. | Valencia,<br>R., Pitman,<br>N., Leon-<br>Yanez, S.<br>&<br>Jorgensen,<br>P.M.<br>(Ecuador<br>Plants Red<br>List<br>Authority) |
| 4288<br>5    | ARACEAE | <i>Anthurium<br/>cordiforme</i>    | Sodiro     | 2003               | 30/04/03            | LC       | NA        | Benavides,<br>G. &<br>Pitman, N. | Valencia,<br>R., Pitman,<br>N., Leon-<br>Yanez, S.<br>&<br>Jorgensen,<br>P.M.<br>(Ecuador<br>Plants Red<br>List<br>Authority) |
| 4439<br>3499 | ARACEAE | <i>Anthurium<br/>crenatum</i>      | (L.) Kunth | 2013               | 24/10/08            | LC       | NA        | Crook, V.                        | Scott, J.A.                                                                                                                   |

| taxo<br>nid  | family  | scientific_<br>name                      | authority          | published_<br>year | assessment<br>_date | category | criteria  | assessor                         | reviewer                                                                                                                      |
|--------------|---------|------------------------------------------|--------------------|--------------------|---------------------|----------|-----------|----------------------------------|-------------------------------------------------------------------------------------------------------------------------------|
| 4288<br>7    | ARACEAE | <i>Anthurium<br/>curtispadix</i>         | Croat              | 2003               | 30/04/03            | VU       | B1ab(iii) | Benavides,<br>G. &<br>Pitman, N. | Valencia,<br>R., Pitman,<br>N., Leon-<br>Yanez, S.<br>&<br>Jorgensen,<br>P.M.<br>(Ecuador<br>Plants Red<br>List<br>Authority) |
| 4288<br>8    | ARACEAE | <i>Anthurium<br/>cuspidiferu<br/>m</i>   | Sodiro             | 2003               | 37741               | DD       | NA        | Benavides,<br>G. &<br>Pitman, N. | Valencia,<br>R., Pitman,<br>N., Leon-<br>Yanez, S.<br>&<br>Jorgensen,<br>P.M.<br>(Ecuador<br>Plants Red<br>List<br>Authority) |
| 4288<br>9    | ARACEAE | <i>Anthurium<br/>cutucuense</i>          | Madison            | 2003               | 30/04/03            | EN       | B1ab(iii) | Benavides,<br>G. &<br>Pitman, N. | Valencia,<br>R., Pitman,<br>N., Leon-<br>Yanez, S.<br>&<br>Jorgensen,<br>P.M.<br>(Ecuador<br>Plants Red<br>List<br>Authority) |
| 2248<br>6388 | ARACEAE | <i>Anthurium<br/>debilis</i>             | Croat &<br>D.C.Bay | 2016               | 1/12/15             | LC       | NA        | Canteiro,<br>C.                  | Haigh, A.                                                                                                                     |
| 4289<br>0    | ARACEAE | <i>Anthurium<br/>dendrobate<br/>s</i>    | Sodiro             | 2003               | 30/04/03            | DD       | NA        | Benavides,<br>G. &<br>Pitman, N. | Valencia,<br>R., Pitman,<br>N., Leon-<br>Yanez, S.<br>&<br>Jorgensen,<br>P.M.<br>(Ecuador<br>Plants Red<br>List<br>Authority) |
| 4289<br>1    | ARACEAE | <i>Anthurium<br/>dolichophyl<br/>lum</i> | Sodiro             | 2003               | 30/04/03            | VU       | B1ab(iii) | Benavides,<br>G. &<br>Pitman, N. | Valencia,<br>R., Pitman,<br>N., Leon-<br>Yanez, S.<br>&<br>Jorgensen,<br>P.M.<br>(Ecuador<br>Plants Red<br>List<br>Authority) |
| 4289<br>2    | ARACEAE | <i>Anthurium<br/>ecuadorens<br/>e</i>    | Engl.              | 2003               | 30/04/03            | VU       | D2        | Benavides,<br>G. &<br>Pitman, N. | Valencia,<br>R., Pitman,<br>N., Leon-<br>Yanez, S.<br>&<br>Jorgensen,<br>P.M.<br>(Ecuador<br>Plants Red<br>List<br>Authority) |

| taxo<br>nid  | family  | scientific_<br>name                    | authority | published_<br>year | assessment<br>_date | category | criteria          | assessor                         | reviewer                                                                                                                      |
|--------------|---------|----------------------------------------|-----------|--------------------|---------------------|----------|-------------------|----------------------------------|-------------------------------------------------------------------------------------------------------------------------------|
| 4289<br>3    | ARACEAE | <i>Anthurium<br/>eggersii</i>          | Engl.     | 2017               | 30/04/03            | CR       | A4c;<br>B1ab(iii) | Benavides,<br>G. &<br>Pitman, N. | Valencia,<br>R., Pitman,<br>N., Leon-<br>Yanez, S.<br>&<br>Jorgensen,<br>P.M.<br>(Ecuador<br>Plants Red<br>List<br>Authority) |
| 4289<br>4    | ARACEAE | <i>Anthurium<br/>esmeralden<br/>se</i> | Sodiro    | 2003               | 30/04/03            | VU       | A4c               | Benavides,<br>G. &<br>Pitman, N. | Valencia,<br>R., Pitman,<br>N., Leon-<br>Yanez, S.<br>&<br>Jorgensen,<br>P.M.<br>(Ecuador<br>Plants Red<br>List<br>Authority) |
| 4289<br>5    | ARACEAE | <i>Anthurium<br/>exstipulatu<br/>m</i> | Sodiro    | 2003               | 30/04/03            | DD       | NA                | Benavides,<br>G. &<br>Pitman, N. | Valencia,<br>R., Pitman,<br>N., Leon-<br>Yanez, S.<br>&<br>Jorgensen,<br>P.M.<br>(Ecuador<br>Plants Red<br>List<br>Authority) |
| 4289<br>7    | ARACEAE | <i>Anthurium<br/>fasciale</i>          | Sodiro    | 2003               | 30/04/03            | LC       | NA                | Benavides,<br>G. &<br>Pitman, N. | Valencia,<br>R., Pitman,<br>N., Leon-<br>Yanez, S.<br>&<br>Jorgensen,<br>P.M.<br>(Ecuador<br>Plants Red<br>List<br>Authority) |
| 4289<br>9    | ARACEAE | <i>Anthurium<br/>furcatum</i>          | Sodiro    | 2003               | 30/04/03            | NT       | NA                | Benavides,<br>G. &<br>Pitman, N. | Valencia,<br>R., Pitman,<br>N., Leon-<br>Yanez, S.<br>&<br>Jorgensen,<br>P.M.<br>(Ecuador<br>Plants Red<br>List<br>Authority) |
| 4439<br>2603 | ARACEAE | <i>Anthurium<br/>gehrigeri</i>         | Croat     | 2013               | 27/10/08            | LC       | NA                | Crook, V.                        | Scott, J.A.                                                                                                                   |
| 4290<br>2    | ARACEAE | <i>Anthurium<br/>geniculatu<br/>m</i>  | Sodiro    | 2003               | 37741               | DD       | NA                | Benavides,<br>G. &<br>Pitman, N. | Valencia,<br>R., Pitman,<br>N., Leon-<br>Yanez, S.<br>&<br>Jorgensen,<br>P.M.<br>(Ecuador<br>Plants Red<br>List<br>Authority) |

| taxo<br>nid       | family  | scientific_<br>name                       | authority                         | published_<br>year | assessment_<br>date | category | criteria  | assessor                         | reviewer                                                                                                                      |
|-------------------|---------|-------------------------------------------|-----------------------------------|--------------------|---------------------|----------|-----------|----------------------------------|-------------------------------------------------------------------------------------------------------------------------------|
| 4290<br>3         | ARACEAE | <i>Anthurium<br/>glaucophyll<br/>um</i>   | Sodiro                            | 2003               | 30/04/03            | DD       | NA        | Benavides,<br>G. &<br>Pitman, N. | Valencia,<br>R., Pitman,<br>N., Leon-<br>Yanez, S.<br>&<br>Jorgensen,<br>P.M.<br>(Ecuador<br>Plants Red<br>List<br>Authority) |
| 1297<br>3940<br>2 | ARACEAE | <i>Anthurium<br/>glaucospad<br/>ix</i>    | Croat                             | 2019               | 19/06/18            | LC       | NA        | Canteiro,<br>C. &<br>Haigh, A.   | Aguilar-<br>Cano, J. &<br>Zuluaga, A.                                                                                         |
| 4290<br>6         | ARACEAE | <i>Anthurium<br/>hastifolium</i>          | Sodiro                            | 2003               | 30/04/03            | DD       | NA        | Benavides,<br>G. &<br>Pitman, N. | Valencia,<br>R., Pitman,<br>N., Leon-<br>Yanez, S.<br>&<br>Jorgensen,<br>P.M.<br>(Ecuador<br>Plants Red<br>List<br>Authority) |
| 4290<br>7         | ARACEAE | <i>Anthurium<br/>hebetatilam<br/>inum</i> | Croat<br>& J.<br>Rodr.            | 2003               | 30/04/03            | VU       | D2        | Benavides,<br>G. &<br>Pitman, N. | Valencia,<br>R., Pitman,<br>N., Leon-<br>Yanez, S.<br>&<br>Jorgensen,<br>P.M.<br>(Ecuador<br>Plants Red<br>List<br>Authority) |
| 4290<br>8         | ARACEAE | <i>Anthurium<br/>hieronymi</i>            | Engl.                             | 2003               | 30/04/03            | EN       | B1ab(iii) | Benavides,<br>G. &<br>Pitman, N. | Valencia,<br>R., Pitman,<br>N., Leon-<br>Yanez, S.<br>&<br>Jorgensen,<br>P.M.<br>(Ecuador<br>Plants Red<br>List<br>Authority) |
| 1297<br>3945<br>0 | ARACEAE | <i>Anthurium<br/>hodgei</i>               | Croat,<br>M.M.Mora<br>&<br>Oberle | 2019               | 20/06/18            | LC       | NA        | Canteiro,<br>C. &<br>Haigh, A.   | Aguilar-<br>Cano, J. &<br>Zuluaga, A.                                                                                         |
| 4291<br>2         | ARACEAE | <i>Anthurium<br/>julospadix</i>           | Sodiro                            | 2003               | 37741               | DD       | NA        | Benavides,<br>G. &<br>Pitman, N. | Valencia,<br>R., Pitman,<br>N., Leon-<br>Yanez, S.<br>&<br>Jorgensen,<br>P.M.<br>(Ecuador<br>Plants Red<br>List<br>Authority) |
| 4291<br>3         | ARACEAE | <i>Anthurium<br/>latemargin<br/>atum</i>  | Sodiro                            | 2003               | 30/04/03            | DD       | NA        | Benavides,<br>G. &<br>Pitman, N. | Valencia,<br>R., Pitman,<br>N., Leon-<br>Yanez, S.<br>&<br>Jorgensen,<br>P.M.                                                 |

| taxo<br>nid       | family  | scientific_<br>name                      | authority             | published_<br>year | assessment<br>_date | category | criteria               | assessor                         | reviewer                                                                                                                      |
|-------------------|---------|------------------------------------------|-----------------------|--------------------|---------------------|----------|------------------------|----------------------------------|-------------------------------------------------------------------------------------------------------------------------------|
|                   |         |                                          |                       |                    |                     |          |                        |                                  | (Ecuador<br>Plants Red<br>List<br>Authority)                                                                                  |
| 4291<br>4         | ARACEAE | <i>Anthurium<br/>lennartii</i>           | Croat                 | 2013               | 28/10/08            | EN       | B1ab(iii)<br>+2ab(iii) | Crook, V.                        | Scott, J.A.                                                                                                                   |
| 4291<br>5         | ARACEAE | <i>Anthurium<br/>leonianum</i>           | Sodiro                | 2003               | 30/04/03            | VU       | B1ab(iii)              | Benavides,<br>G. &<br>Pitman, N. | Valencia,<br>R., Pitman,<br>N., Leon-<br>Yanez, S.<br>&<br>Jorgensen,<br>P.M.<br>(Ecuador<br>Plants Red<br>List<br>Authority) |
| 4291<br>6         | ARACEAE | <i>Anthurium<br/>lineolatum</i>          | Sodiro                | 2003               | 30/04/03            | DD       | NA                     | Benavides,<br>G. &<br>Pitman, N. | Valencia,<br>R., Pitman,<br>N., Leon-<br>Yanez, S.<br>&<br>Jorgensen,<br>P.M.<br>(Ecuador<br>Plants Red<br>List<br>Authority) |
| 4291<br>7         | ARACEAE | <i>Anthurium<br/>lingua</i>              | Sodiro                | 2013               | 29/10/08            | LC       | NA                     | Crook, V.                        | Scott, J.A.                                                                                                                   |
| 4291<br>9         | ARACEAE | <i>Anthurium<br/>macrolon-<br/>chium</i> | Sodiro                | 2003               | 30/04/03            | DD       | NA                     | Benavides,<br>G. &<br>Pitman, N. | Valencia,<br>R., Pitman,<br>N., Leon-<br>Yanez, S.<br>&<br>Jorgensen,<br>P.M.<br>(Ecuador<br>Plants Red<br>List<br>Authority) |
| 4292<br>0         | ARACEAE | <i>Anthurium<br/>maculosum</i>           | Sodiro                | 2003               | 30/04/03            | NT       | NA                     | Benavides,<br>G. &<br>Pitman, N. | Valencia,<br>R., Pitman,<br>N., Leon-<br>Yanez, S.<br>&<br>Jorgensen,<br>P.M.<br>(Ecuador<br>Plants Red<br>List<br>Authority) |
| 1297<br>3964<br>5 | ARACEAE | <i>Anthurium<br/>magnificum</i>          | Linden                | 2019               | 27/06/18            | NT       | NA                     | Canteiro,<br>C. &<br>Haigh, A.   | Aguilar-<br>Cano, J. &<br>Zuluaga, A.                                                                                         |
| 4292<br>1         | ARACEAE | <i>Anthurium<br/>magnifoliu<br/>m</i>    | Croat<br>&<br>J.Rodr. | 2003               | 30/04/03            | VU       | B1ab(iii)<br>; D2      | Benavides,<br>G. &<br>Pitman, N. | Valencia,<br>R., Pitman,<br>N., Leon-<br>Yanez, S.<br>&<br>Jorgensen,<br>P.M.<br>(Ecuador<br>Plants Red<br>List<br>Authority) |
| 4292<br>2         | ARACEAE | <i>Anthurium<br/>manabianu<br/>m</i>     | Croat                 | 2003               | 30/04/03            | VU       | D2                     | Benavides,<br>G. &<br>Pitman, N. | Valencia,<br>R., Pitman,<br>N., Leon-                                                                                         |

| taxo<br>nid | family  | scientific_<br>name                      | authority             | published_<br>year | assessment<br>_date | category | criteria          | assessor                         | reviewer                                                                                                                      |
|-------------|---------|------------------------------------------|-----------------------|--------------------|---------------------|----------|-------------------|----------------------------------|-------------------------------------------------------------------------------------------------------------------------------|
|             |         |                                          |                       |                    |                     |          |                   |                                  | Yanez, S.<br>&<br>Jorgensen,<br>P.M.<br>(Ecuador<br>Plants Red<br>List<br>Authority)                                          |
| 4292<br>3   | ARACEAE | <i>Anthurium<br/>masfense</i>            | Sodiro                | 2003               | 30/04/03            | DD       | NA                | Benavides,<br>G. &<br>Pitman, N. | Valencia,<br>R., Pitman,<br>N., Leon-<br>Yanez, S.<br>&<br>Jorgensen,<br>P.M.<br>(Ecuador<br>Plants Red<br>List<br>Authority) |
| 4292<br>4   | ARACEAE | <i>Anthurium<br/>miniatum</i>            | Sodiro                | 2003               | 30/04/03            | VU       | B1ab(iii)         | Benavides,<br>G. &<br>Pitman, N. | Valencia,<br>R., Pitman,<br>N., Leon-<br>Yanez, S.<br>&<br>Jorgensen,<br>P.M.<br>(Ecuador<br>Plants Red<br>List<br>Authority) |
| 4292<br>5   | ARACEAE | <i>Anthurium<br/>myosurus</i>            | Sodiro                | 2003               | 30/04/03            | DD       | NA                | Benavides,<br>G. &<br>Pitman, N. | Valencia,<br>R., Pitman,<br>N., Leon-<br>Yanez, S.<br>&<br>Jorgensen,<br>P.M.<br>(Ecuador<br>Plants Red<br>List<br>Authority) |
| 4292<br>7   | ARACEAE | <i>Anthurium<br/>nemorale</i>            | Sodiro                | 2003               | 30/04/03            | VU       | B1ab(iii)<br>; D2 | Benavides,<br>G. &<br>Pitman, N. | Valencia,<br>R., Pitman,<br>N., Leon-<br>Yanez, S.<br>&<br>Jorgensen,<br>P.M.<br>(Ecuador<br>Plants Red<br>List<br>Authority) |
| 4292<br>9   | ARACEAE | <i>Anthurium<br/>nigropunct<br/>atum</i> | Croat<br>&<br>J.Rodr. | 2003               | 30/04/03            | NT       | NA                | Benavides,<br>G. &<br>Pitman, N. | Valencia,<br>R., Pitman,<br>N., Leon-<br>Yanez, S.<br>&<br>Jorgensen,<br>P.M.<br>(Ecuador<br>Plants Red<br>List<br>Authority) |
| 4293<br>0   | ARACEAE | <i>Anthurium<br/>nitens</i>              | Sodiro                | 2003               | 30/04/03            | DD       | NA                | Benavides,<br>G. &<br>Pitman, N. | Valencia,<br>R., Pitman,<br>N., Leon-<br>Yanez, S.<br>&<br>Jorgensen,<br>P.M.                                                 |

| taxo<br>nid | family  | scientific_<br>name                     | authority | published_<br>year | assessment<br>_date | category | criteria | assessor                         | reviewer                                                                                                                      |
|-------------|---------|-----------------------------------------|-----------|--------------------|---------------------|----------|----------|----------------------------------|-------------------------------------------------------------------------------------------------------------------------------|
|             |         |                                         |           |                    |                     |          |          |                                  | (Ecuador<br>Plants Red<br>List<br>Authority)                                                                                  |
| 4293<br>2   | ARACEAE | <i>Anthurium<br/>occidentale</i>        | Sodiro    | 2003               | 30/04/03            | DD       | NA       | Benavides,<br>G. &<br>Pitman, N. | Valencia,<br>R., Pitman,<br>N., Leon-<br>Yanez, S.<br>&<br>Jorgensen,<br>P.M.<br>(Ecuador<br>Plants Red<br>List<br>Authority) |
| 4293<br>4   | ARACEAE | <i>Anthurium<br/>oreodoxum</i>          | Sodiro    | 2003               | 37741               | DD       | NA       | Benavides,<br>G. &<br>Pitman, N. | Valencia,<br>R., Pitman,<br>N., Leon-<br>Yanez, S.<br>&<br>Jorgensen,<br>P.M.<br>(Ecuador<br>Plants Red<br>List<br>Authority) |
| 4293<br>5   | ARACEAE | <i>Anthurium<br/>orientale</i>          | Sodiro    | 2003               | 30/04/03            | DD       | NA       | Benavides,<br>G. &<br>Pitman, N. | Valencia,<br>R., Pitman,<br>N., Leon-<br>Yanez, S.<br>&<br>Jorgensen,<br>P.M.<br>(Ecuador<br>Plants Red<br>List<br>Authority) |
| 4293<br>6   | ARACEAE | <i>Anthurium<br/>oxyphyllum</i>         | Sodiro    | 2017               | 30/04/03            | VU       | A4c      | Benavides,<br>G. &<br>Pitman, N. | Valencia,<br>R., Pitman,<br>N., Leon-<br>Yanez, S.<br>&<br>Jorgensen,<br>P.M.<br>(Ecuador<br>Plants Red<br>List<br>Authority) |
| 4293<br>8   | ARACEAE | <i>Anthurium<br/>pallatange<br/>nse</i> | Engl.     | 2003               | 37741               | NT       | NA       | Benavides,<br>G. &<br>Pitman, N. | Valencia,<br>R., Pitman,<br>N., Leon-<br>Yanez, S.<br>&<br>Jorgensen,<br>P.M.<br>(Ecuador<br>Plants Red<br>List<br>Authority) |
| 4293<br>9   | ARACEAE | <i>Anthurium<br/>pallidifloru<br/>m</i> | Engl.     | 2003               | 37741               | LC       | NA       | Benavides,<br>G. &<br>Pitman, N. | Valencia,<br>R., Pitman,<br>N., Leon-<br>Yanez, S.<br>&<br>Jorgensen,<br>P.M.<br>(Ecuador<br>Plants Red<br>List<br>Authority) |

| taxo<br>nid | family  | scientific_<br>name                          | authority | published_<br>year | assessment<br>_date | category | criteria  | assessor                         | reviewer                                                                                                                      |
|-------------|---------|----------------------------------------------|-----------|--------------------|---------------------|----------|-----------|----------------------------------|-------------------------------------------------------------------------------------------------------------------------------|
| 4294<br>1   | ARACEAE | <i>Anthurium<br/>peduncular<br/>e</i>        | Sodiro    | 2003               | 37741               | VU       | A4c       | Benavides,<br>G. &<br>Pitman, N. | Valencia,<br>R., Pitman,<br>N., Leon-<br>Yanez, S.<br>&<br>Jorgensen,<br>P.M.<br>(Ecuador<br>Plants Red<br>List<br>Authority) |
| 4294<br>2   | ARACEAE | <i>Anthurium<br/>pellucidopu<br/>nctatum</i> | Sodiro    | 2003               | 37741               | DD       | NA        | Benavides,<br>G. &<br>Pitman, N. | Valencia,<br>R., Pitman,<br>N., Leon-<br>Yanez, S.<br>&<br>Jorgensen,<br>P.M.<br>(Ecuador<br>Plants Red<br>List<br>Authority) |
| 4294<br>3   | ARACEAE | <i>Anthurium<br/>pichincha</i>               | Engl.     | 2003               | 37741               | EN       | B1ab(iii) | Benavides,<br>G. &<br>Pitman, N. | Valencia,<br>R., Pitman,<br>N., Leon-<br>Yanez, S.<br>&<br>Jorgensen,<br>P.M.<br>(Ecuador<br>Plants Red<br>List<br>Authority) |
| 4294<br>4   | ARACEAE | <i>Anthurium<br/>pirotae</i>                 | Sodiro    | 2003               | 37741               | DD       | NA        | Benavides,<br>G. &<br>Pitman, N. | Valencia,<br>R., Pitman,<br>N., Leon-<br>Yanez, S.<br>&<br>Jorgensen,<br>P.M.<br>(Ecuador<br>Plants Red<br>List<br>Authority) |
| 4294<br>5   | ARACEAE | <i>Anthurium<br/>plantagine<br/>um</i>       | Sodiro    | 2003               | 37741               | DD       | NA        | Benavides,<br>G. &<br>Pitman, N. | Valencia,<br>R., Pitman,<br>N., Leon-<br>Yanez, S.<br>&<br>Jorgensen,<br>P.M.<br>(Ecuador<br>Plants Red<br>List<br>Authority) |
| 4294<br>6   | ARACEAE | <i>Anthurium<br/>plurisulcat<br/>um</i>      | Sodiro    | 2003               | 37741               | DD       | NA        | Benavides,<br>G. &<br>Pitman, N. | Valencia,<br>R., Pitman,<br>N., Leon-<br>Yanez, S.<br>&<br>Jorgensen,<br>P.M.<br>(Ecuador<br>Plants Red<br>List<br>Authority) |
| 4294<br>7   | ARACEAE | <i>Anthurium<br/>polyneuron</i>              | Sodiro    | 2003               | 37741               | DD       | NA        | Benavides,<br>G. &<br>Pitman, N. | Valencia,<br>R., Pitman,<br>N., Leon-<br>Yanez, S.                                                                            |

| taxo<br>nid  | family  | scientific_<br>name                   | authority           | published_<br>year | assessment<br>_date | category | criteria | assessor                         | reviewer                                                                                                                      |
|--------------|---------|---------------------------------------|---------------------|--------------------|---------------------|----------|----------|----------------------------------|-------------------------------------------------------------------------------------------------------------------------------|
|              |         |                                       |                     |                    |                     |          |          |                                  | &<br>Jorgensen,<br>P.M.<br>(Ecuador<br>Plants Red<br>List<br>Authority)                                                       |
| 4294<br>9    | ARACEAE | <i>Anthurium<br/>polyphlebium</i>     | Sodiro              | 2003               | 37741               | DD       | NA       | Benavides,<br>G. &<br>Pitman, N. | Valencia,<br>R., Pitman,<br>N., Leon-<br>Yanez, S.<br>&<br>Jorgensen,<br>P.M.<br>(Ecuador<br>Plants Red<br>List<br>Authority) |
| 4439<br>3534 | ARACEAE | <i>Anthurium<br/>prominerve</i>       | Croat &<br>M.M.Mora | 2013               | 39750               | LC       | NA       | Crook, V.                        | Scott, J.A.                                                                                                                   |
| 2248<br>6334 | ARACEAE | <i>Anthurium<br/>puberulinerivium</i> | Croat               | 2016               | 42339               | NT       | NA       | Canteiro,<br>C.                  | Haigh, A.                                                                                                                     |
| 4295<br>2    | ARACEAE | <i>Anthurium<br/>punctatum</i>        | N.E. Br.            | 2003               | 37741               | VU       | A4c      | Benavides,<br>G. &<br>Pitman, N. | Valencia,<br>R., Pitman,<br>N., Leon-<br>Yanez, S.<br>&<br>Jorgensen,<br>P.M.<br>(Ecuador<br>Plants Red<br>List<br>Authority) |
| 4295<br>4    | ARACEAE | <i>Anthurium<br/>radiatum</i>         | Sodiro              | 2003               | 37741               | DD       | NA       | Benavides,<br>G. &<br>Pitman, N. | Valencia,<br>R., Pitman,<br>N., Leon-<br>Yanez, S.<br>&<br>Jorgensen,<br>P.M.<br>(Ecuador<br>Plants Red<br>List<br>Authority) |
| 4295<br>8    | ARACEAE | <i>Anthurium<br/>rigidifolium</i>     | Engl.               | 2003               | 37741               | LC       | NA       | Benavides,<br>G. &<br>Pitman, N. | Valencia,<br>R., Pitman,<br>N., Leon-<br>Yanez, S.<br>&<br>Jorgensen,<br>P.M.<br>(Ecuador<br>Plants Red<br>List<br>Authority) |
| 4295<br>9    | ARACEAE | <i>Anthurium<br/>rimbachii</i>        | Sodiro              | 2003               | 37741               | VU       | A4c      | Benavides,<br>G. &<br>Pitman, N. | Valencia,<br>R., Pitman,<br>N., Leon-<br>Yanez, S.<br>&<br>Jorgensen,<br>P.M.<br>(Ecuador<br>Plants Red<br>List<br>Authority) |

| taxo<br>nid  | family  | scientific_<br>name                   | authority              | published_<br>year | assessment<br>_date | category | criteria  | assessor                              | reviewer                                                                                                                      |
|--------------|---------|---------------------------------------|------------------------|--------------------|---------------------|----------|-----------|---------------------------------------|-------------------------------------------------------------------------------------------------------------------------------|
| 4296<br>1    | ARACEAE | <i>Anthurium<br/>rugulosum</i>        | Sodirol                | 2003               | 37741               | LC       | NA        | Benavides,<br>G. &<br>Pitman, N.      | Valencia,<br>R., Pitman,<br>N., Leon-<br>Yanez, S.<br>&<br>Jorgensen,<br>P.M.<br>(Ecuador<br>Plants Red<br>List<br>Authority) |
| 4439<br>3359 | ARACEAE | <i>Anthurium<br/>sagittatum</i>       | (Sims)<br>G.Don        | 2013               | 40165               | LC       | NA        | Crook, V.<br>& Romand-<br>Monnier, F. | Scott, J.A.                                                                                                                   |
| 4296<br>9    | ARACEAE | <i>Anthurium<br/>silanchense</i>      | Croat<br>& J.<br>Rodr. | 2003               | 37741               | VU       | D2        | Benavides,<br>G. &<br>Pitman, N.      | Valencia,<br>R., Pitman,<br>N., Leon-<br>Yanez, S.<br>&<br>Jorgensen,<br>P.M.<br>(Ecuador<br>Plants Red<br>List<br>Authority) |
| 8659<br>6978 | ARACEAE | <i>Anthurium<br/>sinuatum</i>         | Benth. ex<br>Schott    | 2016               | 42349               | LC       | NA        | Canteiro,<br>C.                       | Haigh, A.                                                                                                                     |
| 4297<br>0    | ARACEAE | <i>Anthurium<br/>sodirolanu<br/>m</i> | Engl.                  | 2003               | 37741               | LC       | NA        | Benavides,<br>G. &<br>Pitman, N.      | Valencia,<br>R., Pitman,<br>N., Leon-<br>Yanez, S.<br>&<br>Jorgensen,<br>P.M.<br>(Ecuador<br>Plants Red<br>List<br>Authority) |
| 4297<br>1    | ARACEAE | <i>Anthurium<br/>sparreorum</i>       | Croat                  | 2003               | 37741               | NT       | NA        | Benavides,<br>G. &<br>Pitman, N.      | Valencia,<br>R., Pitman,<br>N., Leon-<br>Yanez, S.<br>&<br>Jorgensen,<br>P.M.<br>(Ecuador<br>Plants Red<br>List<br>Authority) |
| 4297<br>8    | ARACEAE | <i>Anthurium<br/>superbum</i>         | Madison                | 2003               | 37741               | VU       | B1ab(iii) | Benavides,<br>G. &<br>Pitman, N.      | Valencia,<br>R., Pitman,<br>N., Leon-<br>Yanez, S.<br>&<br>Jorgensen,<br>P.M.<br>(Ecuador<br>Plants Red<br>List<br>Authority) |
| 4297<br>9    | ARACEAE | <i>Anthurium<br/>tenaense</i>         | Croat                  | 2003               | 37741               | VU       | B1ab(iii) | Benavides,<br>G. &<br>Pitman, N.      | Valencia,<br>R., Pitman,<br>N., Leon-<br>Yanez, S.<br>&<br>Jorgensen,<br>P.M.<br>(Ecuador<br>Plants Red                       |

| taxo<br>nid       | family           | scientific_<br>name                    | authority                     | published_<br>year | assessment<br>_date | category | criteria  | assessor                             | reviewer                                                                                                                      |
|-------------------|------------------|----------------------------------------|-------------------------------|--------------------|---------------------|----------|-----------|--------------------------------------|-------------------------------------------------------------------------------------------------------------------------------|
|                   |                  |                                        |                               |                    |                     |          |           |                                      | List<br>Authority)                                                                                                            |
| 4298<br>1         | ARACEAE          | <i>Anthurium<br/>tenuifolium</i>       | Engl.                         | 2003               | 37741               | EN       | B1ab(iii) | Benavides,<br>G. &<br>Pitman, N.     | Valencia,<br>R., Pitman,<br>N., Leon-<br>Yanez, S.<br>&<br>Jorgensen,<br>P.M.<br>(Ecuador<br>Plants Red<br>List<br>Authority) |
| 4298<br>3         | ARACEAE          | <i>Anthurium<br/>tonianum</i>          | Sodiro                        | 2003               | 37741               | DD       | NA        | Benavides,<br>G. &<br>Pitman, N.     | Valencia,<br>R., Pitman,<br>N., Leon-<br>Yanez, S.<br>&<br>Jorgensen,<br>P.M.<br>(Ecuador<br>Plants Red<br>List<br>Authority) |
| 4298<br>5         | ARACEAE          | <i>Anthurium<br/>tremulum</i>          | Sodiro                        | 2003               | 37741               | LC       | NA        | Benavides,<br>G. &<br>Pitman, N.     | Valencia,<br>R., Pitman,<br>N., Leon-<br>Yanez, S.<br>&<br>Jorgensen,<br>P.M.<br>(Ecuador<br>Plants Red<br>List<br>Authority) |
| 4439<br>2768      | ARACEAE          | <i>Anthurium<br/>umbricola</i>         | Engl.                         | 2013               | 39755               | LC       | NA        | Crook, V.                            | Scott, J.A.                                                                                                                   |
| 4298<br>7         | ARACEAE          | <i>Anthurium<br/>vomeriforme</i>       | Sodiro                        | 2003               | 37741               | DD       | NA        | Benavides,<br>G. &<br>Pitman, N.     | Valencia,<br>R., Pitman,<br>N., Leon-<br>Yanez, S.<br>&<br>Jorgensen,<br>P.M.<br>(Ecuador<br>Plants Red<br>List<br>Authority) |
| 1297<br>3950<br>4 | ARACEAE          | <i>Anthurium<br/>zuluagae</i>          | Croat                         | 2019               | 43280               | VU       | B1ab(iii) | Canteiro,<br>C. &<br>Haigh, A.       | Aguilar-<br>Cano, J. &<br>Zuluaga, A.                                                                                         |
| 4321<br>7         | BROMELIA<br>CEAE | <i>Aechmea<br/>abbreviata</i>          | L.B.Sm.                       | 2003               | 30/04/03            | LC       | NA        | Manzanare<br>s, J.M. &<br>Pitman, N. | Valencia,<br>R., Pitman,<br>N., Leon-<br>Yanez, S.<br>&<br>Jorgensen,<br>P.M.<br>(Ecuador<br>Plants Red<br>List<br>Authority) |
| 4321<br>8         | BROMELIA<br>CEAE | <i>Aechmea<br/>aculeatose<br/>pala</i> | (Rauh<br>& Barthlott)<br>Leme | 2003               | 30/04/03            | VU       | A2a       | Manzanare<br>s, J.M. &<br>Pitman, N. | Valencia,<br>R., Pitman,<br>N., Leon-<br>Yanez, S.<br>&<br>Jorgensen,<br>P.M.                                                 |

| taxonid   | family           | scientific_name              | authority                                                | published_year | assessment_date | category | criteria                | assessor                                                                     | reviewer                                                                                             |
|-----------|------------------|------------------------------|----------------------------------------------------------|----------------|-----------------|----------|-------------------------|------------------------------------------------------------------------------|------------------------------------------------------------------------------------------------------|
|           |                  |                              |                                                          |                |                 |          |                         |                                                                              | (Ecuador Plants Red List Authority)                                                                  |
| 43219     | BROMELIA<br>CEAE | <i>Aechmea biflora</i>       | (L.B.Sm.)<br>L.B.Sm.<br>&<br>M.A.Spencer                 | 2003           | 30/04/03        | VU       | A4d;<br>C2a(i)          | Manzanars, J.M. &<br>Pitman, N.                                              | Valencia, R., Pitman, N., Leon-Yanez, S. &<br>Jorgensen, P.M.<br>(Ecuador Plants Red List Authority) |
| 44393036  | BROMELIA<br>CEAE | <i>Aechmea candida</i>       | E.Morren<br>ex Baker                                     | 2014           | 8/08/13         | DD       | NA                      | Crook, V.<br>& Lutz, M.                                                      | Moraes, M.                                                                                           |
| 43220     | BROMELIA<br>CEAE | <i>Aechmea geminiflora</i>   | (Harms)<br>L.B.Sm.<br>&<br>M.A.Spencer                   | 2017           | 30/04/03        | DD       | NA                      | Manzanars, J.M. &<br>Pitman, N.                                              | Valencia, R., Pitman, N., Leon-Yanez, S. &<br>Jorgensen, P.M.<br>(Ecuador Plants Red List Authority) |
| 43221     | BROMELIA<br>CEAE | <i>Aechmea kentii</i>        | (H.Luther)<br>L.B.Sm.<br>&<br>M.A.Spencer                | 2003           | 30/04/03        | EN       | B1ab(iii)               | Manzanars, J.M. &<br>Pitman, N.                                              | Valencia, R., Pitman, N., Leon-Yanez, S. &<br>Jorgensen, P.M.<br>(Ecuador Plants Red List Authority) |
| 44393202  | BROMELIA<br>CEAE | <i>Aechmea kleinii</i>       | Reitz                                                    | 2014           | 12/04/12        | EN       | B2ab(iii)               | Moraes, M.                                                                   | Messina, T. &<br>Santos Filho, L.                                                                    |
| 128202940 | BROMELIA<br>CEAE | <i>Aechmea kuntzeana</i>     | Mez                                                      | 2021           | 6/07/20         | NT       | NA                      | Panter, C.T.                                                                 | Mendoza F. &<br>J.M.                                                                                 |
| 164980495 | BROMELIA<br>CEAE | <i>Aechmea longiramosa</i>   | Betancur &<br>Aguirre-Santoro                            | 2022           | 19/11/19        | LC       | NA                      | Betancur, J., Aguirre-Santoro, J.A., Vallejo, L. &<br>Bohórquez-Osorio, A.F. | García, N.                                                                                           |
| 43222     | BROMELIA<br>CEAE | <i>Aechmea lugoii</i>        | (Gilmartin &<br>H.Luther)<br>L.B.Sm.<br>&<br>M.A.Spencer | 2003           | 30/04/03        | VU       | B1ab(iii)               | Manzanars, J.M. &<br>Pitman, N.                                              | Valencia, R., Pitman, N., Leon-Yanez, S. &<br>Jorgensen, P.M.<br>(Ecuador Plants Red List Authority) |
| 43223     | BROMELIA<br>CEAE | <i>Aechmea manzanarsiana</i> | H.E.Luther                                               | 2013           | 10/12/08        | EN       | B1ab(iii, v)+2ab(ii, v) | Crook, V.                                                                    | Scott, J.A.                                                                                          |

| taxo<br>nid       | family           | scientific_<br>name                    | authority               | published_<br>year | assessment<br>_date | category | criteria  | assessor                                                                                                                       | reviewer                                                                                                                      |
|-------------------|------------------|----------------------------------------|-------------------------|--------------------|---------------------|----------|-----------|--------------------------------------------------------------------------------------------------------------------------------|-------------------------------------------------------------------------------------------------------------------------------|
| 4322<br>4         | BROMELIA<br>CEAE | <i>Aechmea<br/>napoensis</i>           | L.B.Sm.<br>&M.A.Spencer | 2003               | 30/04/03            | NT       | NA        | Manzanare<br>s, J.M. &<br>Pitman, N.                                                                                           | Valencia,<br>R., Pitman,<br>N., Leon-<br>Yanez, S.<br>&<br>Jorgensen,<br>P.M.<br>(Ecuador<br>Plants Red<br>List<br>Authority) |
| 1649<br>8069<br>8 | BROMELIA<br>CEAE | <i>Aechmea<br/>nivea</i>               | L.B.Sm.                 | 2022               | 19/11/19            | LC       | NA        | Betancur,<br>J., Aguirre-<br>Santoro,<br>J.A.,<br>Vallejo, L.,<br>Ramírez<br>Padilla, B.<br>&<br>Bohórquez-<br>Osorio,<br>A.F. | García,<br>N.                                                                                                                 |
| 4322<br>5         | BROMELIA<br>CEAE | <i>Aechmea<br/>patriciae</i>           | H.Luther                | 2003               | 30/04/03            | VU       | D2        | Manzanare<br>s, J.M. &<br>Pitman, N.                                                                                           | Valencia,<br>R., Pitman,<br>N., Leon-<br>Yanez, S.<br>&<br>Jorgensen,<br>P.M.<br>(Ecuador<br>Plants Red<br>List<br>Authority) |
| 4322<br>6         | BROMELIA<br>CEAE | <i>Aechmea<br/>roeseliae</i>           | H.Luther                | 2003               | 30/04/03            | VU       | B1ab(iii) | Manzanare<br>s, J.M. &<br>Pitman, N.                                                                                           | Valencia,<br>R., Pitman,<br>N., Leon-<br>Yanez, S.<br>&<br>Jorgensen,<br>P.M.<br>(Ecuador<br>Plants Red<br>List<br>Authority) |
| 4322<br>7         | BROMELIA<br>CEAE | <i>Aechmea<br/>tayoensis</i>           | Gilmartin               | 2003               | 30/04/03            | EN       | B1ab(iii) | Manzanare<br>s, J.M. &<br>Pitman, N.                                                                                           | Valencia,<br>R., Pitman,<br>N., Leon-<br>Yanez, S.<br>&<br>Jorgensen,<br>P.M.<br>(Ecuador<br>Plants Red<br>List<br>Authority) |
| 1282<br>0304<br>5 | BROMELIA<br>CEAE | <i>Billbergia<br/>brasiliensis</i>     | L.B.Sm.                 | 2021               | 12/03/19            | DD       | NA        | Panter,<br>C.T.                                                                                                                | Mendoza<br>F. & J.M.                                                                                                          |
| 4439<br>3611      | BROMELIA<br>CEAE | <i>Billbergia<br/>viridiflora</i>      | H.Wendl.                | 2013               | 17/03/09            | LC       | NA        | Romand-<br>Monnier, F.<br>& Contu,<br>S.                                                                                       | Scott, J.A.                                                                                                                   |
| 4323<br>1         | BROMELIA<br>CEAE | <i>Guzmania<br/>aequatorial<br/>is</i> | L.B.Sm.                 | 2003               | 30/04/03            | VU       | D1        | Manzanare<br>s, J.M. &<br>Pitman, N.                                                                                           | Valencia,<br>R., Pitman,<br>N., Leon-<br>Yanez, S.<br>&<br>Jorgensen,<br>P.M.                                                 |

| taxonid           | family           | scientific_name                | authority            | published_year | assessment_date | category | criteria       | assessor                                                                  | reviewer                                                                                       |
|-------------------|------------------|--------------------------------|----------------------|----------------|-----------------|----------|----------------|---------------------------------------------------------------------------|------------------------------------------------------------------------------------------------|
|                   |                  |                                |                      |                |                 |          |                |                                                                           | (Ecuador Plants Red List Authority)                                                            |
| 4323<br>2         | BROMELIA<br>CEAE | <i>Guzmania albescens</i>      | H.Luther & Determann | 2003           | 30/04/03        | EN       | A4c; B1ab(iii) | Manzanars, J.M. & Pitman, N.                                              | Valencia, R., Pitman, N., Leon-Yanez, S. & Jorgensen, P.M. (Ecuador Plants Red List Authority) |
| 4323<br>3         | BROMELIA<br>CEAE | <i>Guzmania alborosea</i>      | H.Luther             | 2003           | 30/04/03        | VU       | A4d            | Manzanars, J.M. & Pitman, N.                                              | Valencia, R., Pitman, N., Leon-Yanez, S. & Jorgensen, P.M. (Ecuador Plants Red List Authority) |
| 4323<br>4         | BROMELIA<br>CEAE | <i>Guzmania alcantareoides</i> | H.Luther             | 2003           | 30/04/03        | EN       | B1ab(iii)      | Manzanars, J.M. & Pitman, N.                                              | Valencia, R., Pitman, N., Leon-Yanez, S. & Jorgensen, P.M. (Ecuador Plants Red List Authority) |
| 1910<br>7679<br>1 | BROMELIA<br>CEAE | <i>Guzmania andreana</i>       | (E. Morren) Mez      | 2022           | 19/11/19        | LC       | NA             | Betancur, J., Aguirre-Santoro, J.A., Vallejo, L. & Bohórquez-Osorio, A.F. | García, N.                                                                                     |
| 4323<br>5         | BROMELIA<br>CEAE | <i>Guzmania andreatae</i>      | Rauh                 | 2003           | 30/04/03        | VU       | A4d; D2        | Manzanars, J.M. & Pitman, N.                                              | Valencia, R., Pitman, N., Leon-Yanez, S. & Jorgensen, P.M. (Ecuador Plants Red List Authority) |
| 4323<br>6         | BROMELIA<br>CEAE | <i>Guzmania asplundii</i>      | L.B.Sm.              | 2003           | 30/04/03        | LC       | NA             | Manzanars, J.M. & Pitman, N.                                              | Valencia, R., Pitman, N., Leon-Yanez, S. & Jorgensen, P.M. (Ecuador Plants Red List Authority) |

| taxo<br>nid       | family           | scientific_<br>name                   | authority                    | published_<br>year | assessment<br>_date | category | criteria               | assessor                                                                                                                                | reviewer                                                                                                                      |
|-------------------|------------------|---------------------------------------|------------------------------|--------------------|---------------------|----------|------------------------|-----------------------------------------------------------------------------------------------------------------------------------------|-------------------------------------------------------------------------------------------------------------------------------|
| 4323<br>7         | BROMELIA<br>CEAE | <i>Guzmania<br/>atrocastane<br/>a</i> | H.Luther                     | 2003               | 30/04/03            | VU       | D2                     | Manzanare<br>s, J.M. &<br>Pitman, N.                                                                                                    | Valencia,<br>R., Pitman,<br>N., Leon-<br>Yanez, S.<br>&<br>Jorgensen,<br>P.M.<br>(Ecuador<br>Plants Red<br>List<br>Authority) |
| 4323<br>8         | BROMELIA<br>CEAE | <i>Guzmania<br/>barbiei</i>           | Rauh                         | 2003               | 30/04/03            | DD       | NA                     | Manzanare<br>s, J.M. &<br>Pitman, N.                                                                                                    | Valencia,<br>R., Pitman,<br>N., Leon-<br>Yanez, S.<br>&<br>Jorgensen,<br>P.M.<br>(Ecuador<br>Plants Red<br>List<br>Authority) |
| 1910<br>7688<br>5 | BROMELIA<br>CEAE | <i>Guzmania<br/>betancurii</i>        | H.Luther                     | 2022               | 18/11/19            | EN       | B1ab(iii)<br>+2ab(iii) | Betancur,<br>J., Aguirre-<br>Santoro,<br>J.A.,<br>Vallejo, L.<br>&<br>Boh√z Osorio,<br>A.F.                                             | Garcv#a,<br>N.                                                                                                                |
| 1910<br>7660<br>4 | BROMELIA<br>CEAE | <i>Guzmania<br/>bicolor</i>           | L.B.Sm.                      | 2022               | 19/11/19            | LC       | NA                     | Betancur,<br>J., Aguirre-<br>Santoro,<br>J.A.,<br>Vallejo, L.<br>&<br>Boh√z Osorio,<br>A.F.                                             | Garcv#a,<br>N.                                                                                                                |
| 4439<br>2315      | BROMELIA<br>CEAE | <i>Guzmania<br/>bismarckii</i>        | Rauh                         | 2013               | 25/03/09            | CR       | B1ab(iii,i<br>v,v)     | Romand-<br>Monnier, F.<br>& Contu,<br>S.                                                                                                | Scott, J.A.                                                                                                                   |
| 4439<br>2376      | BROMELIA<br>CEAE | <i>Guzmania<br/>calamifolia</i>       | Andrv© ex<br>Mez             | 2013               | 27/03/09            | LC       | NA                     | Romand-<br>Monnier, F.<br>& Contu,<br>S.                                                                                                | Scott, J.A.                                                                                                                   |
| 1366<br>6068<br>9 | BROMELIA<br>CEAE | <i>Guzmania<br/>candelabru<br/>m</i>  | (Andrv©)<br>Andrv© ex<br>Mez | 2019               | 19/11/18            | LC       | NA                     | Betancur,<br>J., Aguirre-<br>Santoro,<br>J.A.,<br>Salinas, N.,<br>L√pez,<br>M.,<br>Ram√rez<br>Padilla, B.<br>& Toro<br>Murillo,<br>J.L. | Garcv#a,<br>N.                                                                                                                |
| 4324<br>0         | BROMELIA<br>CEAE | <i>Guzmania<br/>condorensi<br/>s</i>  | H.Luther                     | 2003               | 30/04/03            | EN       | B1ab(iii)              | Manzanare<br>s, J.M. &<br>Pitman, N.                                                                                                    | Valencia,<br>R., Pitman,<br>N., Leon-<br>Yanez, S.<br>&<br>Jorgensen,<br>P.M.<br>(Ecuador<br>Plants Red                       |

| taxo<br>nid       | family           | scientific_<br>name                    | authority | published_<br>year | assessment<br>_date | category | criteria  | assessor                                                                                                                                    | reviewer                                                                                                                      |
|-------------------|------------------|----------------------------------------|-----------|--------------------|---------------------|----------|-----------|---------------------------------------------------------------------------------------------------------------------------------------------|-------------------------------------------------------------------------------------------------------------------------------|
|                   |                  |                                        |           |                    |                     |          |           |                                                                                                                                             | List<br>Authority)                                                                                                            |
| 1366<br>6072<br>3 | BROMELIA<br>CEAE | <i>Guzmania<br/>confinis</i>           | L.B. Sm.  | 2019               | 19/11/18            | LC       | NA        | Betancur,<br>J., Aguirre-<br>Santoro,<br>J.A.,<br>Salinas, N.,<br>Lvarezpez,<br>M.,<br>Ramirez<br>Padilla, B.<br>& Toro<br>Murillo,<br>J.L. | García, N.                                                                                                                    |
| 4324<br>1         | BROMELIA<br>CEAE | <i>Guzmania<br/>corniculata</i>        | H.Luther  | 2003               | 30/04/03            | VU       | D2        | Manzanare<br>s, J.M. &<br>Pitman, N.                                                                                                        | Valencia,<br>R., Pitman,<br>N., Leon-<br>Yanez, S.<br>&<br>Jorgensen,<br>P.M.<br>(Ecuador<br>Plants Red<br>List<br>Authority) |
| 1910<br>7382<br>2 | BROMELIA<br>CEAE | <i>Guzmania<br/>cuatrecasa<br/>sii</i> | L.B.Sm.   | 2022               | 19/11/19            | LC       | NA        | Betancur,<br>J., Aguirre-<br>Santoro,<br>J.A.,<br>Vallejo, L.<br>&<br>Bohórquez-<br>Osorio,<br>A.F.                                         | García, N.                                                                                                                    |
| 4324<br>2         | BROMELIA<br>CEAE | <i>Guzmania<br/>dalstroemii</i>        | H.Luther  | 2003               | 30/04/03            | VU       | B1ab(iii) | Manzanare<br>s, J.M. &<br>Pitman, N.                                                                                                        | Valencia,<br>R., Pitman,<br>N., Leon-<br>Yanez, S.<br>&<br>Jorgensen,<br>P.M.<br>(Ecuador<br>Plants Red<br>List<br>Authority) |
| 1366<br>6073<br>2 | BROMELIA<br>CEAE | <i>Guzmania<br/>densiflora</i>         | Mez       | 2019               | 19/11/18            | LC       | NA        | Betancur,<br>J., Aguirre-<br>Santoro,<br>J.A.,<br>Salinas, N.,<br>Lvarezpez,<br>M.,<br>Ramirez<br>Padilla, B.<br>& Toro<br>Murillo,<br>J.L. | García, N.                                                                                                                    |
| 1366<br>6073<br>5 | BROMELIA<br>CEAE | <i>Guzmania<br/>diffusa</i>            | L.B. Sm.  | 2019               | 19/11/18            | LC       | NA        | Betancur,<br>J., Aguirre-<br>Santoro,<br>J.A.,<br>Salinas, N.,<br>Lvarezpez,<br>M.,<br>Ramirez<br>Padilla, B.<br>& Toro<br>Murillo,<br>J.L. | García, N.                                                                                                                    |

| taxo<br>nid       | family           | scientific_<br>name                       | authority                              | published_<br>year | assessment<br>_date | category | criteria          | assessor                                                                                                                                    | reviewer                                                                                                                      |
|-------------------|------------------|-------------------------------------------|----------------------------------------|--------------------|---------------------|----------|-------------------|---------------------------------------------------------------------------------------------------------------------------------------------|-------------------------------------------------------------------------------------------------------------------------------|
| 4324<br>3         | BROMELIA<br>CEAE | <i>Guzmania<br/>ecuadorens<br/>is</i>     | Gilmartin                              | 2003               | 30/04/03            | EN       | A2a;<br>B1ab(iii) | Manzanare<br>s, J.M. &<br>Pitman, N.                                                                                                        | Valencia,<br>R., Pitman,<br>N., Leon-<br>Yanez, S.<br>&<br>Jorgensen,<br>P.M.<br>(Ecuador<br>Plants Red<br>List<br>Authority) |
| 4324<br>4         | BROMELIA<br>CEAE | <i>Guzmania<br/>foetida</i>               | Rauh                                   | 2003               | 30/04/03            | NT       | NA                | Manzanare<br>s, J.M. &<br>Pitman, N.                                                                                                        | Valencia,<br>R., Pitman,<br>N., Leon-<br>Yanez, S.<br>&<br>Jorgensen,<br>P.M.<br>(Ecuador<br>Plants Red<br>List<br>Authority) |
| 1910<br>7391<br>7 | BROMELIA<br>CEAE | <i>Guzmania<br/>formosa</i>               | H.Luther                               | 2022               | 20/11/19            | EN       | B1ab(iii)         | Betancur,<br>J., Aguirre-<br>Santoro,<br>J.A.,<br>Vallejo, L.,<br>Toro, J.,<br>Zuluaga, A.<br>&<br>Boh√≥rque<br>z-Osorio,<br>A.F.           | Garcv√≥a,<br>N.                                                                                                               |
| 4324<br>5         | BROMELIA<br>CEAE | <i>Guzmania<br/>fosteriana</i>            | L.B.Sm.                                | 2003               | 30/04/03            | NT       | NA                | Manzanare<br>s, J.M. &<br>Pitman, N.                                                                                                        | Valencia,<br>R., Pitman,<br>N., Leon-<br>Yanez, S.<br>&<br>Jorgensen,<br>P.M.<br>(Ecuador<br>Plants Red<br>List<br>Authority) |
| 4324<br>6         | BROMELIA<br>CEAE | <i>Guzmania<br/>fuerstenber<br/>giana</i> | (C.E.Kirch<br>hoff & Wittm.)<br>Wittm. | 2003               | 30/04/03            | EN       | A4ac              | Manzanare<br>s, J.M. &<br>Pitman, N.                                                                                                        | Valencia,<br>R., Pitman,<br>N., Leon-<br>Yanez, S.<br>&<br>Jorgensen,<br>P.M.<br>(Ecuador<br>Plants Red<br>List<br>Authority) |
| 1313<br>4259<br>0 | BROMELIA<br>CEAE | <i>Guzmania<br/>goudotiana</i>            | Mez                                    | 2019               | 21/11/18            | VU       | B1ab(iii)         | Betancur,<br>J., Aguirre-<br>Santoro,<br>J.A.,<br>Salinas, N.,<br>Lv√≥pez,<br>M.,<br>Ramv√≥rez<br>Padilla, B.<br>& Toro<br>Murillo,<br>J.L. | Garcv√≥a,<br>N.                                                                                                               |
| 4324<br>9         | BROMELIA<br>CEAE | <i>Guzmania<br/>harlingii</i>             | H.Luther                               | 2003               | 30/04/03            | VU       | B1ab(iii)         | Manzanare<br>s, J.M. &<br>Pitman, N.                                                                                                        | Valencia,<br>R., Pitman,<br>N., Leon-                                                                                         |

| taxo<br>nid | family           | scientific_<br>name             | authority                  | published_<br>year | assessment<br>_date | category | criteria  | assessor                             | reviewer                                                                                                                      |
|-------------|------------------|---------------------------------|----------------------------|--------------------|---------------------|----------|-----------|--------------------------------------|-------------------------------------------------------------------------------------------------------------------------------|
|             |                  |                                 |                            |                    |                     |          |           |                                      | Yanez, S.<br>&<br>Jorgensen,<br>P.M.<br>(Ecuador<br>Plants Red<br>List<br>Authority)                                          |
| 4325<br>0   | BROMELIA<br>CEAE | <i>Guzmania<br/>henniae</i>     | H.Luther                   | 2003               | 30/04/03            | EN       | B1ab(iii) | Manzanare<br>s, J.M. &<br>Pitman, N. | Valencia,<br>R., Pitman,<br>N., Leon-<br>Yanez, S.<br>&<br>Jorgensen,<br>P.M.<br>(Ecuador<br>Plants Red<br>List<br>Authority) |
| 4325<br>1   | BROMELIA<br>CEAE | <i>Guzmania<br/>hirtzii</i>     | H.Luther                   | 2003               | 30/04/03            | VU       | D2        | Manzanare<br>s, J.M. &<br>Pitman, N. | Valencia,<br>R., Pitman,<br>N., Leon-<br>Yanez, S.<br>&<br>Jorgensen,<br>P.M.<br>(Ecuador<br>Plants Red<br>List<br>Authority) |
| 4325<br>2   | BROMELIA<br>CEAE | <i>Guzmania<br/>hollinensis</i> | H.Luther                   | 2003               | 30/04/03            | VU       | B1ab(iii) | Manzanare<br>s, J.M. &<br>Pitman, N. | Valencia,<br>R., Pitman,<br>N., Leon-<br>Yanez, S.<br>&<br>Jorgensen,<br>P.M.<br>(Ecuador<br>Plants Red<br>List<br>Authority) |
| 4325<br>3   | BROMELIA<br>CEAE | <i>Guzmania<br/>inexpectata</i> | H.Luther                   | 2003               | 30/04/03            | VU       | D2        | Manzanare<br>s, J.M. &<br>Pitman, N. | Valencia,<br>R., Pitman,<br>N., Leon-<br>Yanez, S.<br>&<br>Jorgensen,<br>P.M.<br>(Ecuador<br>Plants Red<br>List<br>Authority) |
| 4325<br>4   | BROMELIA<br>CEAE | <i>Guzmania<br/>izkoi</i>       | Manzanare<br>s &<br>W.Till | 2003               | 30/04/03            | VU       | D2        | Manzanare<br>s, J.M. &<br>Pitman, N. | Valencia,<br>R., Pitman,<br>N., Leon-<br>Yanez, S.<br>&<br>Jorgensen,<br>P.M.<br>(Ecuador<br>Plants Red<br>List<br>Authority) |
| 4325<br>5   | BROMELIA<br>CEAE | <i>Guzmania<br/>jaramilloi</i>  | H.Luther                   | 2003               | 30/04/03            | LC       | NA        | Manzanare<br>s, J.M. &<br>Pitman, N. | Valencia,<br>R., Pitman,<br>N., Leon-<br>Yanez, S.<br>&<br>Jorgensen,<br>P.M.                                                 |

| taxo<br>nid       | family           | scientific_<br>name            | authority                  | published_<br>year | assessment<br>_date | category | criteria          | assessor                                                                                                                         | reviewer                                                                                                                      |
|-------------------|------------------|--------------------------------|----------------------------|--------------------|---------------------|----------|-------------------|----------------------------------------------------------------------------------------------------------------------------------|-------------------------------------------------------------------------------------------------------------------------------|
|                   |                  |                                |                            |                    |                     |          |                   |                                                                                                                                  | (Ecuador<br>Plants Red<br>List<br>Authority)                                                                                  |
| 1910<br>8249<br>2 | BROMELIA<br>CEAE | <i>Guzmania<br/>kalbreyeri</i> | (Baker)<br>L.B.Sm.         | 2022               | 19/11/19            | LC       | NA                | Betancur,<br>J., Aguirre-<br>Santoro,<br>J.A.,<br>Vallejo, L.,<br>Ramírez<br>Padilla, B.<br>&<br>Bohórquez-<br>Osorio,<br>A.F.   | García, N.                                                                                                                    |
| 4325<br>6         | BROMELIA<br>CEAE | <i>Guzmania<br/>kentii</i>     | H.Luther                   | 2003               | 30/04/03            | VU       | D2                | Manzanare<br>s, J.M. &<br>Pitman, N.                                                                                             | Valencia,<br>R., Pitman,<br>N., Leon-<br>Yanez, S.<br>&<br>Jorgensen,<br>P.M.<br>(Ecuador<br>Plants Red<br>List<br>Authority) |
| 1910<br>7720<br>5 | BROMELIA<br>CEAE | <i>Guzmania<br/>laeta</i>      | H.Luther                   | 2022               | 20/11/19            | LC       | NA                | Betancur,<br>J., Aguirre-<br>Santoro,<br>J.A.,<br>Vallejo, L.,<br>Toro, J.,<br>Zuluaga, A.<br>&<br>Bohórquez-<br>Osorio,<br>A.F. | García, N.                                                                                                                    |
| 4325<br>7         | BROMELIA<br>CEAE | <i>Guzmania<br/>lepidota</i>   | (Andr.)<br>Andr. ex<br>Mez | 2003               | 30/04/03            | CR       | B1ab(iii)         | Manzanare<br>s, J.M. &<br>Pitman, N.                                                                                             | Valencia,<br>R., Pitman,<br>N., Leon-<br>Yanez, S.<br>&<br>Jorgensen,<br>P.M.<br>(Ecuador<br>Plants Red<br>List<br>Authority) |
| 4439<br>2710      | BROMELIA<br>CEAE | <i>Guzmania<br/>macropoda</i>  | L.B.Sm.                    | 2013               | 17/07/13            | LC       | NA                | Romand-<br>Monnier,<br>F., Contu,<br>S. &<br>Chadburn,<br>H.                                                                     | Scott, J.A.                                                                                                                   |
| 4325<br>8         | BROMELIA<br>CEAE | <i>Guzmania<br/>madisonii</i>  | H.Luther                   | 2003               | 30/04/03            | VU       | A2d;<br>B1ab(iii) | Manzanare<br>s, J.M. &<br>Pitman, N.                                                                                             | Valencia,<br>R., Pitman,<br>N., Leon-<br>Yanez, S.<br>&<br>Jorgensen,<br>P.M.<br>(Ecuador<br>Plants Red<br>List<br>Authority) |
| 1366<br>6073<br>8 | BROMELIA<br>CEAE | <i>Guzmania<br/>mosquerae</i>  | (Wittm.)<br>Mez            | 2019               | 20/11/18            | LC       | NA                | Betancur,<br>J., Aguirre-<br>Santoro,<br>J.A.,                                                                                   | García, N.                                                                                                                    |

| taxo<br>nid       | family           | scientific_<br>name                        | authority                    | published_<br>year | assessment<br>_date | category | criteria               | assessor                                                                                                                         | reviewer                                                                                                                      |
|-------------------|------------------|--------------------------------------------|------------------------------|--------------------|---------------------|----------|------------------------|----------------------------------------------------------------------------------------------------------------------------------|-------------------------------------------------------------------------------------------------------------------------------|
|                   |                  |                                            |                              |                    |                     |          |                        | Salinas, N.,<br>Lv≥pez,<br>M.,<br>Ramv≠rez<br>Padilla, B.<br>& Toro<br>Murillo,<br>J.L.                                          |                                                                                                                               |
| 4325<br>9         | BROMELIA<br>CEAE | <i>Guzmania<br/>osyana</i>                 | (E.Morren)<br>Mez            | 2003               | 30/04/03            | EN       | B2ab(iii)              | Manzanare<br>s, J.M. &<br>Pitman, N.                                                                                             | Valencia,<br>R., Pitman,<br>N., Leon-<br>Yanez, S.<br>&<br>Jorgensen,<br>P.M.<br>(Ecuador<br>Plants Red<br>List<br>Authority) |
| 1910<br>7640<br>0 | BROMELIA<br>CEAE | <i>Guzmania<br/>pallida</i>                | L.B.Sm.                      | 2022               | 19/11/19            | EN       | B1ab(iii)<br>+2ab(iii) | Betancur,<br>J., Aguirre-<br>Santoro,<br>J.A.,<br>Vallejo, L.<br>&<br>Bohv≥rque<br>z-Osorio,<br>A.F.                             | Garcv≠a,<br>N.                                                                                                                |
| 4326<br>0         | BROMELIA<br>CEAE | <i>Guzmania<br/>poortmanii</i>             | (Andrv®)<br>Andrv® ex<br>Mez | 2003               | 30/04/03            | CR       | A2c;<br>B1ab(iii)      | Manzanare<br>s, J.M. &<br>Pitman, N.                                                                                             | Valencia,<br>R., Pitman,<br>N., Leon-<br>Yanez, S.<br>&<br>Jorgensen,<br>P.M.<br>(Ecuador<br>Plants Red<br>List<br>Authority) |
| 4326<br>1         | BROMELIA<br>CEAE | <i>Guzmania<br/>pseudospec<br/>tabilis</i> | H.Luther                     | 2003               | 30/04/03            | VU       | B1ab(iii)              | Manzanare<br>s, J.M. &<br>Pitman, N.                                                                                             | Valencia,<br>R., Pitman,<br>N., Leon-<br>Yanez, S.<br>&<br>Jorgensen,<br>P.M.<br>(Ecuador<br>Plants Red<br>List<br>Authority) |
| 1910<br>7412<br>0 | BROMELIA<br>CEAE | <i>Guzmania<br/>pungens</i>                | L.B.Sm.                      | 2022               | 19/11/19            | LC       | NA                     | Betancur,<br>J., Aguirre-<br>Santoro,<br>J.A.,<br>Vallejo, L.,<br>Ramv≠rez<br>Padilla, B.<br>&<br>Bohv≥rque<br>z-Osorio,<br>A.F. | Garcv≠a,<br>N.                                                                                                                |
| 4326<br>2         | BROMELIA<br>CEAE | <i>Guzmania<br/>puyoensis</i>              | Rauh                         | 2003               | 30/04/03            | VU       | D2                     | Manzanare<br>s, J.M. &<br>Pitman, N.                                                                                             | Valencia,<br>R., Pitman,<br>N., Leon-<br>Yanez, S.<br>&<br>Jorgensen,<br>P.M.<br>(Ecuador<br>Plants Red                       |

| taxo<br>nid       | family           | scientific_<br>name                   | authority | published_<br>year | assessment<br>_date | category | criteria          | assessor                                                                                      | reviewer                                                                                                                      |
|-------------------|------------------|---------------------------------------|-----------|--------------------|---------------------|----------|-------------------|-----------------------------------------------------------------------------------------------|-------------------------------------------------------------------------------------------------------------------------------|
|                   |                  |                                       |           |                    |                     |          |                   |                                                                                               | List<br>Authority)                                                                                                            |
| 4326<br>3         | BROMELIA<br>CEAE | <i>Guzmania<br/>remyi</i>             | L.B.Sm.   | 2003               | 30/04/03            | LC       | NA                | Manzanare<br>s, J.M. &<br>Pitman, N.                                                          | Valencia,<br>R., Pitman,<br>N., Leon-<br>Yanez, S.<br>&<br>Jorgensen,<br>P.M.<br>(Ecuador<br>Plants Red<br>List<br>Authority) |
| 4326<br>4         | BROMELIA<br>CEAE | <i>Guzmania<br/>roseiflora</i>        | Rauh      | 2003               | 30/04/03            | EN       | A2a;<br>B1ab(iii) | Manzanare<br>s, J.M. &<br>Pitman, N.                                                          | Valencia,<br>R., Pitman,<br>N., Leon-<br>Yanez, S.<br>&<br>Jorgensen,<br>P.M.<br>(Ecuador<br>Plants Red<br>List<br>Authority) |
| 4326<br>5         | BROMELIA<br>CEAE | <i>Guzmania<br/>rubrolutea</i>        | Rauh      | 2003               | 30/04/03            | EN       | B2ab(iii)         | Manzanare<br>s, J.M. &<br>Pitman, N.                                                          | Valencia,<br>R., Pitman,<br>N., Leon-<br>Yanez, S.<br>&<br>Jorgensen,<br>P.M.<br>(Ecuador<br>Plants Red<br>List<br>Authority) |
| 4326<br>6         | BROMELIA<br>CEAE | <i>Guzmania<br/>septata</i>           | L.B.Sm.   | 2003               | 30/04/03            | NT       | NA                | Manzanare<br>s, J.M. &<br>Pitman, N.                                                          | Valencia,<br>R., Pitman,<br>N., Leon-<br>Yanez, S.<br>&<br>Jorgensen,<br>P.M.<br>(Ecuador<br>Plants Red<br>List<br>Authority) |
| 4439<br>2342      | BROMELIA<br>CEAE | <i>Guzmania<br/>sibundoyor<br/>um</i> | L.B.Sm.   | 2013               | 5/01/09             | LC       | NA                | Romand-<br>Monnier, F.<br>& Contu,<br>S.                                                      | Scott, J.A.                                                                                                                   |
| 4326<br>8         | BROMELIA<br>CEAE | <i>Guzmania<br/>striata</i>           | L.B.Sm.   | 2003               | 30/04/03            | CR       | B1ab(iii)         | Manzanare<br>s, J.M. &<br>Pitman, N.                                                          | Valencia,<br>R., Pitman,<br>N., Leon-<br>Yanez, S.<br>&<br>Jorgensen,<br>P.M.<br>(Ecuador<br>Plants Red<br>List<br>Authority) |
| 1910<br>7730<br>0 | BROMELIA<br>CEAE | <i>Guzmania<br/>stricta</i>           | L.B.Sm.   | 2022               | 19/11/19            | LC       | NA                | Betancur,<br>J., Aguirre-<br>Santoro,<br>J.A.,<br>Vallejo, L.,<br>Ramvrez<br>Padilla, B.<br>& | Garcv#a,<br>N.                                                                                                                |

| taxo<br>nid       | family           | scientific_<br>name                    | authority            | published_<br>year | assessment<br>_date | category | criteria               | assessor                                                                                                                          | reviewer                                                                                                                      |
|-------------------|------------------|----------------------------------------|----------------------|--------------------|---------------------|----------|------------------------|-----------------------------------------------------------------------------------------------------------------------------------|-------------------------------------------------------------------------------------------------------------------------------|
|                   |                  |                                        |                      |                    |                     |          |                        | Bohvsrquez-Osorio,<br>A.F.                                                                                                        |                                                                                                                               |
| 4326<br>9         | BROMELIA<br>CEAE | <i>Guzmania<br/>teuscheri</i>          | L.B.Sm.              | 2003               | 30/04/03            | NT       | NA                     | Manzanare<br>s, J.M. &<br>Pitman, N.                                                                                              | Valencia,<br>R., Pitman,<br>N., Leon-<br>Yanez, S.<br>&<br>Jorgensen,<br>P.M.<br>(Ecuador<br>Plants Red<br>List<br>Authority) |
| 1910<br>7740<br>2 | BROMELIA<br>CEAE | <i>Guzmania<br/>triangulari<br/>s</i>  | L.B.Sm.              | 2022               | 19/11/19            | LC       | NA                     | Betancur,<br>J., Aguirre-<br>Santoro,<br>J.A.,<br>Vallejo, L.<br>&<br>Bohvsrquez-<br>Osorio,<br>A.F.                              | Garcv#a,<br>N.                                                                                                                |
| 1910<br>7760<br>3 | BROMELIA<br>CEAE | <i>Guzmania<br/>verecunda</i>          | L.B.Sm.              | 2022               | 19/11/19            | LC       | NA                     | Betancur,<br>J., Aguirre-<br>Santoro,<br>J.A.,<br>Vallejo, L.,<br>Ramvsrez<br>Padilla, B.<br>&<br>Bohvsrquez-<br>Osorio,<br>A.F.  | Garcv#a,<br>N.                                                                                                                |
| 4327<br>0         | BROMELIA<br>CEAE | <i>Guzmania<br/>xanthobrac<br/>tea</i> | Gilmartin            | 2003               | 30/04/03            | NT       | NA                     | Manzanare<br>s, J.M. &<br>Pitman, N.                                                                                              | Valencia,<br>R., Pitman,<br>N., Leon-<br>Yanez, S.<br>&<br>Jorgensen,<br>P.M.<br>(Ecuador<br>Plants Red<br>List<br>Authority) |
| 4327<br>1         | BROMELIA<br>CEAE | <i>Guzmania<br/>zakii</i>              | H.Luther             | 2003               | 30/04/03            | VU       | D2                     | Manzanare<br>s, J.M. &<br>Pitman, N.                                                                                              | Valencia,<br>R., Pitman,<br>N., Leon-<br>Yanez, S.<br>&<br>Jorgensen,<br>P.M.<br>(Ecuador<br>Plants Red<br>List<br>Authority) |
| 1910<br>7770<br>0 | BROMELIA<br>CEAE | <i>Hohenberg<br/>ia andina</i>         | Betancur             | 2022               | 20/11/19            | EN       | B1ab(iii)<br>+2ab(iii) | Betancur,<br>J., Aguirre-<br>Santoro,<br>J.A.,<br>Vallejo, L.,<br>Toro, J.,<br>Zuluaga, A.<br>&<br>Bohvsrquez-<br>Osorio,<br>A.F. | Garcv#a,<br>N.                                                                                                                |
| 4439<br>3551      | BROMELIA<br>CEAE | <i>Hohenberg<br/>iopsis</i>            | (L.B.Sm.)<br>L.B.Sm. | 2013               | 13/05/09            | EN       | B2ab(ii,ii<br>i)       | Romand-<br>Monnier, F.                                                                                                            | Scott, J.A.                                                                                                                   |

| taxo<br>nid       | family           | scientific_<br>name            | authority                        | published_<br>year | assessment_<br>date | category | criteria          | assessor                                                                                              | reviewer                                                                                       |
|-------------------|------------------|--------------------------------|----------------------------------|--------------------|---------------------|----------|-------------------|-------------------------------------------------------------------------------------------------------|------------------------------------------------------------------------------------------------|
|                   |                  | <i>guatemalensis</i>           |                                  |                    |                     |          |                   |                                                                                                       |                                                                                                |
| 1910<br>7327<br>4 | BROMELIA<br>CEAE | <i>Mezobromelia bicolor</i>    | L.B.Sm.                          | 2022               | 20/11/19            | CR       | B2ab(iii)         | Betancur, J., Aguirre-Santoro, J.A., Vallejo, L., Zuluaga, A., Bohórquez-Osorio, A.F. & Toro, J.      | García, N.                                                                                     |
| 4327<br>2         | BROMELIA<br>CEAE | <i>Mezobromelia brownii</i>    | H.Luther                         | 2003               | 30/04/03            | VU       | D2                | Manzanares, J.M. & Pitman, N.                                                                         | Valencia, R., Pitman, N., Leon-Yanez, S. & Jorgensen, P.M. (Ecuador Plants Red List Authority) |
| 4327<br>3         | BROMELIA<br>CEAE | <i>Mezobromelia fulgens</i>    | L.B.Sm.                          | 2003               | 30/04/03            | EN       | A2a;<br>B1ab(iii) | Manzanares, J.M. & Pitman, N.                                                                         | Valencia, R., Pitman, N., Leon-Yanez, S. & Jorgensen, P.M. (Ecuador Plants Red List Authority) |
| 1313<br>4261<br>2 | BROMELIA<br>CEAE | <i>Mezobromelia hospitalis</i> | (L.B.Sm.)<br>J.R.Grant           | 2019               | 21/11/18            | LC       | NA                | Betancur, J., Aguirre-Santoro, J.A., Salinas, N., López, M., Ramírez Padilla, B. & Toro Murillo, J.L. | García, N.                                                                                     |
| 4439<br>2301      | BROMELIA<br>CEAE | <i>Navia scirpiflora</i>       | L.B.Sm.,<br>Steyerm. &<br>H.Rob. | 2013               | 3/12/09             | DD       | NA                | Romand-Monnier, F. & Contu, S.                                                                        | Scott, J.A.                                                                                    |
| 4439<br>3413      | BROMELIA<br>CEAE | <i>Neoregelia azevedoi</i>     | Leme                             | 2013               | 2/10/09             | EN       | B1ab(iii)         | Romand-Monnier, F. & Contu, S.                                                                        | Moraes, M.                                                                                     |
| 4439<br>2126      | BROMELIA<br>CEAE | <i>Neoregelia laevis</i>       | (Mez)<br>L.B.Sm.                 | 2014               | 7/08/13             | LC       | NA                | Romand-Monnier, F., Contu, S. & Lutz, M.                                                              | Moraes, M.                                                                                     |
| 4439<br>2635      | BROMELIA<br>CEAE | <i>Neoregelia seideliana</i>   | L.B.Sm. &<br>Reitz               | 2013               | 6/08/13             | DD       | NA                | Romand-Monnier, F., Contu, S. & Lutz, M.                                                              | Moraes, M.                                                                                     |
| 4328<br>1         | BROMELIA<br>CEAE | <i>Pitcairnia alata</i>        | L.B.Sm.                          | 2003               | 30/04/03            | EN       | B1ab(iii)         | Manzanares, J.M. & Pitman, N.                                                                         | Valencia, R., Pitman, N., Leon-Yanez, S.                                                       |

| taxonid   | family           | scientific_name                | authority          | published_year | assessment_date | category | criteria          | assessor                                                              | reviewer                                                                                       |
|-----------|------------------|--------------------------------|--------------------|----------------|-----------------|----------|-------------------|-----------------------------------------------------------------------|------------------------------------------------------------------------------------------------|
|           |                  |                                |                    |                |                 |          |                   |                                                                       | & Jorgensen, P.M. (Ecuador Plants Red List Authority)                                          |
| 43282     | BROMELIA<br>CEAE | <i>Pitcairnia andreetae</i>    | H.Luther           | 2003           | 30/04/03        | VU       | D2                | Manzanares, J.M. & Pitman, N.                                         | Valencia, R., Pitman, N., Leon-Yanez, S. & Jorgensen, P.M. (Ecuador Plants Red List Authority) |
| 44392976  | BROMELIA<br>CEAE | <i>Pitcairnia arcuata</i>      | (Andrv©)<br>Andrv© | 2013           | 26/03/09        | LC       | NA                | Romand-Monnier, F. & Contu, S.                                        | Scott, J.A.                                                                                    |
| 43286     | BROMELIA<br>CEAE | <i>Pitcairnia cosangaensis</i> | Gilmartin          | 2003           | 30/04/03        | NT       | NA                | Manzanares, J.M. & Pitman, N.                                         | Valencia, R., Pitman, N., Leon-Yanez, S. & Jorgensen, P.M. (Ecuador Plants Red List Authority) |
| 191075261 | BROMELIA<br>CEAE | <i>Pitcairnia foreroi</i>      | H.Luther & Varad.  | 2022           | 18/11/19        | CR       | B2ab(iii)         | Betancur, J., Aguirre-Santoro, J.A., Vallejo, L. & Bohvz-Osorio, A.F. | Garcv#a, N.                                                                                    |
| 43291     | BROMELIA<br>CEAE | <i>Pitcairnia fusca</i>        | H.Luther           | 2003           | 30/04/03        | LC       | NA                | Manzanares, J.M. & Pitman, N.                                         | Valencia, R., Pitman, N., Leon-Yanez, S. & Jorgensen, P.M. (Ecuador Plants Red List Authority) |
| 43292     | BROMELIA<br>CEAE | <i>Pitcairnia hirtzii</i>      | H.Luther           | 2017           | 30/04/03        | VU       | A2a;<br>B1ab(iii) | Manzanares, J.M. & Pitman, N.                                         | Valencia, R., Pitman, N., Leon-Yanez, S. & Jorgensen, P.M. (Ecuador Plants Red List Authority) |
| 44393520  | BROMELIA<br>CEAE | <i>Pitcairnia macranthera</i>  | Andrv©             | 2013           | 26/03/09        | LC       | NA                | Romand-Monnier, F. & Contu, S.                                        | Scott, J.A.                                                                                    |

| taxo<br>nid       | family           | scientific_<br>name                    | authority                                                     | published_<br>year | assessment<br>_date | category | criteria  | assessor                                                                                                                       | reviewer                                                                                                                      |
|-------------------|------------------|----------------------------------------|---------------------------------------------------------------|--------------------|---------------------|----------|-----------|--------------------------------------------------------------------------------------------------------------------------------|-------------------------------------------------------------------------------------------------------------------------------|
| 1910<br>7052<br>9 | BROMELIA<br>CEAE | <i>Pitcairnia<br/>mucida</i>           | L.B.Sm.<br>&<br>Read                                          | 2022               | 19/11/19            | LC       | NA        | Betancur,<br>J., Aguirre-<br>Santoro,<br>J.A.,<br>Vallejo, L.,<br>Ramírez<br>Padilla, B.<br>&<br>Bohórquez-<br>Osorio,<br>A.F. | García, N.                                                                                                                    |
| 4439<br>3015      | BROMELIA<br>CEAE | <i>Pitcairnia<br/>nigra</i>            | (Carrivère)<br>) André                                        | 2013               | 18/05/09            | LC       | NA        | Romand-<br>Monnier, F.                                                                                                         | Scott, J.A.                                                                                                                   |
| 4329<br>6         | BROMELIA<br>CEAE | <i>Pitcairnia<br/>prolifera</i>        | Rauh                                                          | 2003               | 30/04/03            | VU       | B1ab(iii) | Manzanare<br>s, J.M. &<br>Pitman, N.                                                                                           | Valencia,<br>R., Pitman,<br>N., Leon-<br>Yanez, S.<br>&<br>Jorgensen,<br>P.M.<br>(Ecuador<br>Plants Red<br>List<br>Authority) |
| 4329<br>9         | BROMELIA<br>CEAE | <i>Pitcairnia<br/>sodiroi</i>          | Mez                                                           | 2003               | 30/04/03            | NT       | NA        | Manzanare<br>s, J.M. &<br>Pitman, N.                                                                                           | Valencia,<br>R., Pitman,<br>N., Leon-<br>Yanez, S.<br>&<br>Jorgensen,<br>P.M.<br>(Ecuador<br>Plants Red<br>List<br>Authority) |
| 4330<br>0         | BROMELIA<br>CEAE | <i>Pitcairnia<br/>stevensonii</i>      | H.Luther<br>&<br>Whitten                                      | 2003               | 30/04/03            | VU       | B1ab(iii) | Manzanare<br>s, J.M. &<br>Pitman, N.                                                                                           | Valencia,<br>R., Pitman,<br>N., Leon-<br>Yanez, S.<br>&<br>Jorgensen,<br>P.M.<br>(Ecuador<br>Plants Red<br>List<br>Authority) |
| 4332<br>7         | BROMELIA<br>CEAE | <i>Ronnbergia<br/>campanulat<br/>a</i> | Gilmartin<br>&<br>H.Luther                                    | 2003               | 30/04/03            | EN       | B1ab(iii) | Manzanare<br>s, J.M. &<br>Pitman, N.                                                                                           | Valencia,<br>R., Pitman,<br>N., Leon-<br>Yanez, S.<br>&<br>Jorgensen,<br>P.M.<br>(Ecuador<br>Plants Red<br>List<br>Authority) |
| 4439<br>2345      | BROMELIA<br>CEAE | <i>Ronnbergia<br/>columbiana</i>       | E.Morren                                                      | 2013               | 30/03/09            | LC       | NA        | Romand-<br>Monnier, F.<br>& Contu,<br>S.                                                                                       | Scott, J.A.                                                                                                                   |
| 1910<br>7952<br>6 | BROMELIA<br>CEAE | <i>Ronnbergia<br/>viridispica</i>      | (Aguirre-<br>Santoro<br>&<br>Betancur)<br>Aguirre-<br>Santoro | 2022               | 20/11/19            | CR       | B2ab(iii) | Betancur,<br>J., Aguirre-<br>Santoro,<br>J.A.,<br>Vallejo, L.,<br>Toro, J.,<br>Zuluaga, A.<br>&                                | García, N.                                                                                                                    |

| taxonid           | family           | scientific_name                     | authority                       | published_year | assessment_date | category | criteria  | assessor                                                                                                                                  | reviewer                                                                                                                      |
|-------------------|------------------|-------------------------------------|---------------------------------|----------------|-----------------|----------|-----------|-------------------------------------------------------------------------------------------------------------------------------------------|-------------------------------------------------------------------------------------------------------------------------------|
|                   |                  |                                     |                                 |                |                 |          |           | Boh√rque z-Osorio, A.F.                                                                                                                   |                                                                                                                               |
| 43329             | BROMELIA<br>CEAE | <i>Tillandsia<br/>aequatorialis</i> | L.B.Sm.                         | 2003           | 30/04/03        | VU       | D2        | Manzanare<br>s, J.M. &<br>Pitman, N.                                                                                                      | Valencia,<br>R., Pitman,<br>N., Leon-<br>Yanez, S.<br>&<br>Jorgensen,<br>P.M.<br>(Ecuador<br>Plants Red<br>List<br>Authority) |
| 4439<br>3197      | BROMELIA<br>CEAE | <i>Tillandsia<br/>andrieuxii</i>    | (Mez)<br>L.B.Sm.                | 2013           | 17/07/13        | LC       | NA        | Romand-<br>Monnier,<br>F., Contu,<br>S. &<br>Chadburn,<br>H.                                                                              | Scott, J.A.                                                                                                                   |
| 1910<br>7997<br>4 | BROMELIA<br>CEAE | <i>Tillandsia<br/>bakiorum</i>      | H.Luther                        | 2022           | 19/11/19        | DD       | NA        | Betancur,<br>J., Aguirre-<br>Santoro,<br>J.A.,<br>Vallejo, L.<br>&<br>Boh√rque<br>z-Osorio,<br>A.F.                                       | Garcv#a,<br>N.                                                                                                                |
| 4439<br>3124      | BROMELIA<br>CEAE | <i>Tillandsia<br/>brachycaulos</i>  | Schltld.                        | 2013           | 6/02/09         | LC       | NA        | Romand-<br>Monnier, F.<br>& Contu,<br>S.                                                                                                  | Scott, J.A.                                                                                                                   |
| 4333<br>0         | BROMELIA<br>CEAE | <i>Tillandsia<br/>brenneri</i>      | Rauh                            | 2003           | 30/04/03        | VU       | B1ab(iii) | Manzanare<br>s, J.M. &<br>Pitman, N.                                                                                                      | Valencia,<br>R., Pitman,<br>N., Leon-<br>Yanez, S.<br>&<br>Jorgensen,<br>P.M.<br>(Ecuador<br>Plants Red<br>List<br>Authority) |
| 1313<br>4302<br>6 | BROMELIA<br>CEAE | <i>Tillandsia<br/>breviturneri</i>  | Betancur<br>& N√stor<br>Garcv#a | 2019           | 22/11/18        | EN       | B1ab(iii) | Betancur,<br>J., Aguirre-<br>Santoro,<br>J.A.,<br>Salinas, N.,<br>Lv≥pez,<br>M.,<br>Ramv#rez<br>Padilla, B.<br>& Toro<br>Murillo,<br>J.L. | Garcv#a,<br>N.                                                                                                                |
| 1313<br>4302<br>9 | BROMELIA<br>CEAE | <i>Tillandsia<br/>caloura</i>       | Harms                           | 2019           | 22/11/18        | LC       | NA        | Betancur,<br>J., Aguirre-<br>Santoro,<br>J.A.,<br>Salinas, N.,<br>Lv≥pez,<br>M.,<br>Ramv#rez<br>Padilla, B.<br>& Toro<br>Murillo,<br>J.L. | Garcv#a,<br>N.                                                                                                                |

| taxo<br>nid       | family           | scientific_<br>name                | authority           | published_<br>year | assessment<br>_date | category | criteria         | assessor                                                                                                                                | reviewer                                                                                                                      |
|-------------------|------------------|------------------------------------|---------------------|--------------------|---------------------|----------|------------------|-----------------------------------------------------------------------------------------------------------------------------------------|-------------------------------------------------------------------------------------------------------------------------------|
| 4439<br>2544      | BROMELIA<br>CEAE | <i>Tillandsia<br/>candida</i>      | Leme                | 2014               | 2/09/09             | VU       | B2ab(iii)        | Romand-<br>Monnier, F.                                                                                                                  | Moraes, M.                                                                                                                    |
| 1313<br>6870<br>8 | BROMELIA<br>CEAE | <i>Tillandsia<br/>capillaris</i>   | Ruiz<br>& Pav       | 2019               | 4/02/19             | LC       | NA               | Treviño<br>Zevallos, I.                                                                                                                 | Pazmino,<br>M. &<br>Tognelli,<br>M.F.                                                                                         |
| 4439<br>2605      | BROMELIA<br>CEAE | <i>Tillandsia<br/>capitata</i>     | Griseb.             | 2013               | 19/11/08            | LC       | NA               | Crook, V.                                                                                                                               | Scott, J.A.                                                                                                                   |
| 4439<br>2516      | BROMELIA<br>CEAE | <i>Tillandsia<br/>cardenasii</i>   | L.B.Sm.             | 2013               | 14/05/09            | NT       | NA               | Romand-<br>Monnier, F.                                                                                                                  | Scott, J.A.                                                                                                                   |
| 4333<br>1         | BROMELIA<br>CEAE | <i>Tillandsia<br/>cernua</i>       | L.B.Sm.             | 2003               | 30/04/03            | EN       | A4c              | Manzanare<br>s, J.M. &<br>Pitman, N.                                                                                                    | Valencia,<br>R., Pitman,<br>N., Leon-<br>Yanez, S.<br>&<br>Jorgensen,<br>P.M.<br>(Ecuador<br>Plants Red<br>List<br>Authority) |
| 4439<br>2738      | BROMELIA<br>CEAE | <i>Tillandsia<br/>chaetophylla</i> | Mez                 | 2013               | 25/11/08            | LC       | NA               | Crook, V.                                                                                                                               | Scott, J.A.                                                                                                                   |
| 1313<br>4303<br>2 | BROMELIA<br>CEAE | <i>Tillandsia<br/>chartacea</i>    | L.B.Sm.             | 2019               | 22/11/18            | CR       | B1ab(ii,ii<br>i) | Betancur,<br>J., Aguirre-<br>Santoro,<br>J.A.,<br>Salinas, N.,<br>López,<br>M.,<br>Ramírez<br>Padilla, B.<br>& Toro<br>Murillo,<br>J.L. | García,<br>N.                                                                                                                 |
| 4439<br>3566      | BROMELIA<br>CEAE | <i>Tillandsia<br/>cornuta</i>      | Mez &<br>Sodirol    | 2013               | 11/07/13            | LC       | NA               | Romand-<br>Monnier, F.<br>&<br>Chadburn,<br>H.                                                                                          | Scott, J.A.                                                                                                                   |
| 4333<br>2         | BROMELIA<br>CEAE | <i>Tillandsia<br/>cucullata</i>    | L.B.Sm.             | 2003               | 30/04/03            | VU       | D2               | Manzanare<br>s, J.M. &<br>Pitman, N.                                                                                                    | Valencia,<br>R., Pitman,<br>N., Leon-<br>Yanez, S.<br>&<br>Jorgensen,<br>P.M.<br>(Ecuador<br>Plants Red<br>List<br>Authority) |
| 4333<br>3         | BROMELIA<br>CEAE | <i>Tillandsia<br/>cyanea</i>       | Linden ex<br>K.Koch | 2003               | 30/04/03            | NT       | NA               | Manzanare<br>s, J.M. &<br>Pitman, N.                                                                                                    | Valencia,<br>R., Pitman,<br>N., Leon-<br>Yanez, S.<br>&<br>Jorgensen,<br>P.M.<br>(Ecuador<br>Plants Red<br>List<br>Authority) |
| 1313<br>4305<br>5 | BROMELIA<br>CEAE | <i>Tillandsia<br/>delicatula</i>   | L.B.Sm.             | 2019               | 19/11/18            | LC       | NA               | Betancur,<br>J., Aguirre-<br>Santoro,<br>J.A.,<br>Salinas, N.,<br>López,                                                                | García,<br>N.                                                                                                                 |

| taxo<br>nid       | family           | scientific_<br>name               | authority               | published_<br>year | assessment<br>_date | category | criteria          | assessor                                                                                                                         | reviewer                                                                                                                      |
|-------------------|------------------|-----------------------------------|-------------------------|--------------------|---------------------|----------|-------------------|----------------------------------------------------------------------------------------------------------------------------------|-------------------------------------------------------------------------------------------------------------------------------|
|                   |                  |                                   |                         |                    |                     |          |                   | M.,<br>Ramv≠rez<br>Padilla, B.<br>& Toro<br>Murillo,<br>J.L.                                                                     |                                                                                                                               |
| 4333<br>4         | BROMELIA<br>CEAE | <i>Tillandsia<br/>demissa</i>     | L.B.Sm.                 | 2003               | 30/04/03            | EN       | A2a;<br>B1ab(iii) | Manzanare<br>s, J.M. &<br>Pitman, N.                                                                                             | Valencia,<br>R., Pitman,<br>N., Leon-<br>Yanez, S.<br>&<br>Jorgensen,<br>P.M.<br>(Ecuador<br>Plants Red<br>List<br>Authority) |
| 4333<br>5         | BROMELIA<br>CEAE | <i>Tillandsia<br/>dyeriana</i>    | Andrv®                  | 2003               | 30/04/03            | CR       | A4c               | Manzanare<br>s, J.M. &<br>Pitman, N.                                                                                             | Valencia,<br>R., Pitman,<br>N., Leon-<br>Yanez, S.<br>&<br>Jorgensen,<br>P.M.<br>(Ecuador<br>Plants Red<br>List<br>Authority) |
| 4333<br>6         | BROMELIA<br>CEAE | <i>Tillandsia<br/>emergens</i>    | Mez<br>& Sodi<br>ro     | 2003               | 30/04/03            | VU       | B1ab(iii)         | Manzanare<br>s, J.M. &<br>Pitman, N.                                                                                             | Valencia,<br>R., Pitman,<br>N., Leon-<br>Yanez, S.<br>&<br>Jorgensen,<br>P.M.<br>(Ecuador<br>Plants Red<br>List<br>Authority) |
| 1910<br>8018<br>3 | BROMELIA<br>CEAE | <i>Tillandsia<br/>engleriana</i>  | Wittmack                | 2022               | 19/11/19            | CR       | B2ab(iii)         | Betancur,<br>J., Aguirre-<br>Santoro,<br>J.A.,<br>Vallejo, L.,<br>Ramv≠rez<br>Padilla, B.<br>&<br>Bohv≧rque<br>z-Osorio,<br>A.F. | Garcv≠a,<br>N.                                                                                                                |
| 4439<br>3356      | BROMELIA<br>CEAE | <i>Tillandsia<br/>fasciculata</i> | Sw.                     | 2013               | 5/05/09             | LC       | NA                | Romand-<br>Monnier, F.<br>& Contu,<br>S.                                                                                         | Scott, J.A.                                                                                                                   |
| 1313<br>6879<br>2 | BROMELIA<br>CEAE | <i>Tillandsia<br/>fendleri</i>    | Griseb.                 | 2019               | 4/02/19             | LC       | NA                | Treviv±o<br>Zevallos, I.                                                                                                         | Pazmino,<br>M. &<br>Tognelli,<br>M.F.                                                                                         |
| 4439<br>2235      | BROMELIA<br>CEAE | <i>Tillandsia<br/>foliosa</i>     | M.Martens<br>& Galeotti | 2013               | 26/11/08            | LC       | NA                | Crook, V.                                                                                                                        | Scott, J.A.                                                                                                                   |
| 1366<br>6083<br>5 | BROMELIA<br>CEAE | <i>Tillandsia<br/>fusiformis</i>  | L.B. Sm.                | 2020               | 19/11/18            | EN       | B1ab(iii)         | Betancur,<br>J., Aguirre-<br>Santoro,<br>J.A.,<br>Salinas, N.,<br>Lv≧pez,<br>M.,<br>Ramv≠rez<br>Padilla, B.                      | Garcv≠a,<br>N.                                                                                                                |

| taxo<br>nid       | family           | scientific_<br>name                      | authority          | published_<br>year | assessment<br>_date | category | criteria  | assessor                                                                                                                                  | reviewer                                                                                                                      |
|-------------------|------------------|------------------------------------------|--------------------|--------------------|---------------------|----------|-----------|-------------------------------------------------------------------------------------------------------------------------------------------|-------------------------------------------------------------------------------------------------------------------------------|
|                   |                  |                                          |                    |                    |                     |          |           | & Toro<br>Murillo,<br>J.L.                                                                                                                |                                                                                                                               |
| 4439<br>2233      | BROMELIA<br>CEAE | <i>Tillandsia<br/>geminiflora</i>        | Brongn.            | 2013               | 2/07/09             | LC       | NA        | Romand-<br>Monnier, F.<br>& Contu,<br>S.                                                                                                  | Scott, J.A.                                                                                                                   |
| 4439<br>2240      | BROMELIA<br>CEAE | <i>Tillandsia<br/>hemkeri</i>            | Rauh               | 2013               | 11/07/13            | VU       | B1ab(iii) | Romand-<br>Monnier, F.<br>&<br>Chadburn,<br>H.                                                                                            | Scott, J.A.                                                                                                                   |
| 4333<br>7         | BROMELIA<br>CEAE | <i>Tillandsia<br/>hirtzii</i>            | Rauh               | 2003               | 30/04/03            | VU       | B1ab(iii) | Manzanare<br>s, J.M. &<br>Pitman, N.                                                                                                      | Valencia,<br>R., Pitman,<br>N., Leon-<br>Yanez, S.<br>&<br>Jorgensen,<br>P.M.<br>(Ecuador<br>Plants Red<br>List<br>Authority) |
| 4439<br>2399      | BROMELIA<br>CEAE | <i>Tillandsia<br/>homostach<br/>ya</i>   | Andrv©             | 2013               | 5/07/09             | EN       | B1ab(i)   | Romand-<br>Monnier, F.                                                                                                                    | Scott, J.A.                                                                                                                   |
| 4333<br>8         | BROMELIA<br>CEAE | <i>Tillandsia<br/>indigofera</i>         | Mez<br>&<br>Sodiro | 2003               | 30/04/03            | EN       | A4c       | Manzanare<br>s, J.M. &<br>Pitman, N.                                                                                                      | Valencia,<br>R., Pitman,<br>N., Leon-<br>Yanez, S.<br>&<br>Jorgensen,<br>P.M.<br>(Ecuador<br>Plants Red<br>List<br>Authority) |
| 6487<br>8164      | BROMELIA<br>CEAE | <i>Tillandsia<br/>insularis</i>          | Mez                | 2014               | 31/12/05            | LC       | NA        | Tye, A. &<br>Siemens, T.                                                                                                                  | Hilton-<br>Taylor, C.<br>& Sayer, C.                                                                                          |
| 4439<br>3060      | BROMELIA<br>CEAE | <i>Tillandsia<br/>ionantha</i>           | Planch.            | 2013               | 12/07/13            | LC       | NA        | Romand-<br>Monnier, F.<br>&<br>Chadburn,<br>H.                                                                                            | Scott, J.A.                                                                                                                   |
| 1366<br>6084<br>5 | BROMELIA<br>CEAE | <i>Tillandsia<br/>lajensis</i>           | Andrv©             | 2019               | 19/11/18            | LC       | NA        | Betancur,<br>J., Aguirre-<br>Santoro,<br>J.A.,<br>Salinas, N.,<br>Lv≥pez,<br>M.,<br>Ramv≠rez<br>Padilla, B.<br>& Toro<br>Murillo,<br>J.L. | Garcv≠a,<br>N.                                                                                                                |
| 4439<br>3188      | BROMELIA<br>CEAE | <i>Tillandsia<br/>latifolia</i>          | Meyen              | 2013               | 5/05/09             | LC       | NA        | Romand-<br>Monnier, F.<br>& Contu,<br>S.                                                                                                  | Scott, J.A.                                                                                                                   |
| 4439<br>3398      | BROMELIA<br>CEAE | <i>Tillandsia<br/>limbata</i>            | Schltdl.           | 2013               | 5/11/09             | LC       | NA        | Romand-<br>Monnier, F.<br>& Contu,<br>S.                                                                                                  | Scott, J.A.                                                                                                                   |
| 4439<br>3002      | BROMELIA<br>CEAE | <i>Tillandsia<br/>macroducty<br/>lon</i> | Mez                | 2014               | 5/08/09             | LC       | NA        | Romand-<br>Monnier,<br>F., Contu,<br>S. &                                                                                                 | Hilton-<br>Taylor, C.                                                                                                         |

| taxo<br>nid       | family           | scientific_<br>name               | authority                           | published_<br>year | assessment<br>_date | category | criteria          | assessor                                                                                                                                  | reviewer                                                                                                                      |
|-------------------|------------------|-----------------------------------|-------------------------------------|--------------------|---------------------|----------|-------------------|-------------------------------------------------------------------------------------------------------------------------------------------|-------------------------------------------------------------------------------------------------------------------------------|
|                   |                  |                                   |                                     |                    |                     |          |                   | Chadburn,<br>H.                                                                                                                           |                                                                                                                               |
| 4439<br>3006      | BROMELIA<br>CEAE | <i>Tillandsia<br/>michelii</i>    | Mez                                 | 2013               | 20/11/08            | LC       | NA                | Crook, V.                                                                                                                                 | Scott, J.A.                                                                                                                   |
| 4334<br>0         | BROMELIA<br>CEAE | <i>Tillandsia<br/>nervisepala</i> | (Gilmartin)<br>L.B.Sm.              | 2003               | 30/04/03            | EN       | B1ab(iii)         | Manzanare<br>s, J.M. &<br>Pitman, N.                                                                                                      | Valencia,<br>R., Pitman,<br>N., Leon-<br>Yanez, S.<br>&<br>Jorgensen,<br>P.M.<br>(Ecuador<br>Plants Red<br>List<br>Authority) |
| 4439<br>3442      | BROMELIA<br>CEAE | <i>Tillandsia<br/>ortgiesiana</i> | E.Morren<br>ex Mez                  | 2013               | 27/11/08            | VU       | D2                | Crook, V.                                                                                                                                 | Scott, J.A.                                                                                                                   |
| 4334<br>1         | BROMELIA<br>CEAE | <i>Tillandsia<br/>pachyaxon</i>   | L.B.Sm.                             | 2003               | 30/04/03            | EN       | A4c;<br>B1ab(iii) | Manzanare<br>s, J.M. &<br>Pitman, N.                                                                                                      | Valencia,<br>R., Pitman,<br>N., Leon-<br>Yanez, S.<br>&<br>Jorgensen,<br>P.M.<br>(Ecuador<br>Plants Red<br>List<br>Authority) |
| 1313<br>4305<br>8 | BROMELIA<br>CEAE | <i>Tillandsia<br/>palleescens</i> | Betancur<br>&<br>Nv©stor<br>Garcv#a | 2020               | 22/11/18            | VU       | B1ab(iii)         | Betancur,<br>J., Aguirre-<br>Santoro,<br>J.A.,<br>Salinas, N.,<br>Lv≥pez,<br>M.,<br>Ramv#rez<br>Padilla, B.<br>& Toro<br>Murillo,<br>J.L. | Garcv#a,<br>N.                                                                                                                |
| 4439<br>3383      | BROMELIA<br>CEAE | <i>Tillandsia<br/>paniculata</i>  | (L.) L.                             | 2013               | 15/05/09            | NT       | NA                | Romand-<br>Monnier, F.<br>&<br>Chadburn,<br>H.                                                                                            | Scott, J.A.                                                                                                                   |
| 4334<br>2         | BROMELIA<br>CEAE | <i>Tillandsia<br/>polyantha</i>   | Mez<br>&<br>Sodiro                  | 2003               | 30/04/03            | EN       | A2a               | Manzanare<br>s, J.M. &<br>Pitman, N.                                                                                                      | Valencia,<br>R., Pitman,<br>N., Leon-<br>Yanez, S.<br>&<br>Jorgensen,<br>P.M.<br>(Ecuador<br>Plants Red<br>List<br>Authority) |
| 4334<br>3         | BROMELIA<br>CEAE | <i>Tillandsia<br/>portillae</i>   | E.Gross<br>&<br>R.Wv#lffing<br>hoff | 2003               | 30/04/03            | EN       | A4c;<br>B1ab(iii) | Manzanare<br>s, J.M. &<br>Pitman, N.                                                                                                      | Valencia,<br>R., Pitman,<br>N., Leon-<br>Yanez, S.<br>&<br>Jorgensen,<br>P.M.<br>(Ecuador<br>Plants Red<br>List<br>Authority) |

| taxo<br>nid       | family           | scientific_<br>name                      | authority                      | published_<br>year | assessment<br>_date | category | criteria               | assessor                                                                                                                                                | reviewer                                                                                                                      |
|-------------------|------------------|------------------------------------------|--------------------------------|--------------------|---------------------|----------|------------------------|---------------------------------------------------------------------------------------------------------------------------------------------------------|-------------------------------------------------------------------------------------------------------------------------------|
| 4334<br>4         | BROMELIA<br>CEAE | <i>Tillandsia<br/>pretiosa</i>           | Mez                            | 2003               | 30/04/03            | VU       | A4d;<br>B1ab(iii)      | Manzanare<br>s, J.M. &<br>Pitman, N.                                                                                                                    | Valencia,<br>R., Pitman,<br>N., Leon-<br>Yanez, S.<br>&<br>Jorgensen,<br>P.M.<br>(Ecuador<br>Plants Red<br>List<br>Authority) |
| 4439<br>3077      | BROMELIA<br>CEAE | <i>Tillandsia<br/>pseudomon<br/>tana</i> | W.Weber<br>&<br>Ehlers         | 2014               | 25/10/13            | EN       | B1ab(iii)              | Romand-<br>Monnier, F.<br>& Lutz, M.                                                                                                                    | Messina, T.<br>& Santos<br>Filho, L.                                                                                          |
| 4334<br>5         | BROMELIA<br>CEAE | <i>Tillandsia<br/>raackii</i>            | H.Luther                       | 2003               | 30/04/03            | VU       | D2                     | Manzanare<br>s, J.M. &<br>Pitman, N.                                                                                                                    | Valencia,<br>R., Pitman,<br>N., Leon-<br>Yanez, S.<br>&<br>Jorgensen,<br>P.M.<br>(Ecuador<br>Plants Red<br>List<br>Authority) |
| 1910<br>8043<br>0 | BROMELIA<br>CEAE | <i>Tillandsia<br/>racinae</i>            | L.B.Sm.                        | 2022               | 18/11/19            | EN       | B1ab(iii)<br>+2ab(iii) | Betancur,<br>J., Aguirre-<br>Santoro,<br>J.A.,<br>Vallejo, L.<br>&<br>Boh $\sqrt{\geq}$ z-<br>Osorio,<br>A.F.                                           | Garcv $\neq$ a,<br>N.                                                                                                         |
| 4439<br>2208      | BROMELIA<br>CEAE | <i>Tillandsia<br/>reichenbac<br/>hii</i> | Baker                          | 2013               | 30/04/09            | LC       | NA                     | Romand-<br>Monnier, F.<br>& Contu,<br>S.                                                                                                                | Scott, J.A.                                                                                                                   |
| 1313<br>4306<br>1 | BROMELIA<br>CEAE | <i>Tillandsia<br/>reversa</i>            | L.B.Sm.                        | 2019               | 22/11/18            | EN       | B1ab(iii)              | Betancur,<br>J., Aguirre-<br>Santoro,<br>J.A.,<br>Salinas, N.,<br>Lv $\geq$ pez,<br>M.,<br>Ramv $\neq$ rez<br>Padilla, B.<br>& Toro<br>Murillo,<br>J.L. | Garcv $\neq$ a,<br>N.                                                                                                         |
| 4334<br>6         | BROMELIA<br>CEAE | <i>Tillandsia<br/>rhodosticta</i>        | L.B.Sm.                        | 2003               | 30/04/03            | VU       | B1ab(iii)              | Manzanare<br>s, J.M. &<br>Pitman, N.                                                                                                                    | Valencia,<br>R., Pitman,<br>N., Leon-<br>Yanez, S.<br>&<br>Jorgensen,<br>P.M.<br>(Ecuador<br>Plants Red<br>List<br>Authority) |
| 4439<br>2552      | BROMELIA<br>CEAE | <i>Tillandsia<br/>rhomboide<br/>a</i>    | Andrv $\text{\textcircled{c}}$ | 2013               | 5/07/09             | LC       | NA                     | Romand-<br>Monnier, F.<br>& Contu,<br>S.                                                                                                                | Scott, J.A.                                                                                                                   |
| 4334<br>7         | BROMELIA<br>CEAE | <i>Tillandsia<br/>rubroviolac<br/>ea</i> | Rauh                           | 2003               | 30/04/03            | EN       | A2a;<br>B1ab(iii)      | Manzanare<br>s, J.M. &<br>Pitman, N.                                                                                                                    | Valencia,<br>R., Pitman,<br>N., Leon-<br>Yanez, S.                                                                            |

| taxo<br>nid       | family           | scientific_<br>name                 | authority           | published_<br>year | assessment<br>_date | category | criteria  | assessor                                                                                                                                    | reviewer                                                                                                                      |
|-------------------|------------------|-------------------------------------|---------------------|--------------------|---------------------|----------|-----------|---------------------------------------------------------------------------------------------------------------------------------------------|-------------------------------------------------------------------------------------------------------------------------------|
|                   |                  |                                     |                     |                    |                     |          |           |                                                                                                                                             | &<br>Jorgensen,<br>P.M.<br>(Ecuador<br>Plants Red<br>List<br>Authority)                                                       |
| 4334<br>8         | BROMELIA<br>CEAE | <i>Tillandsia<br/>sceptriformis</i> | Mez<br>&<br>Sodiros | 2003               | 30/04/03            | NT       | NA        | Manzanare<br>s, J.M. &<br>Pitman, N.                                                                                                        | Valencia,<br>R., Pitman,<br>N., Leon-<br>Yanez, S.<br>&<br>Jorgensen,<br>P.M.<br>(Ecuador<br>Plants Red<br>List<br>Authority) |
| 1313<br>4306<br>7 | BROMELIA<br>CEAE | <i>Tillandsia<br/>sigmoidea</i>     | L.B.Sm.             | 2019               | 21/11/18            | EN       | B1ab(iii) | Betancur,<br>J., Aguirre-<br>Santoro,<br>J.A.,<br>Salinas, N.,<br>Lvarezpez,<br>M.,<br>Ramirez<br>Padilla, B.<br>& Toro<br>Murillo,<br>J.L. | Garcera,<br>N.                                                                                                                |
| 4334<br>9         | BROMELIA<br>CEAE | <i>Tillandsia<br/>sodiros</i>       | Mez                 | 2003               | 30/04/03            | VU       | A2a       | Manzanare<br>s, J.M. &<br>Pitman, N.                                                                                                        | Valencia,<br>R., Pitman,<br>N., Leon-<br>Yanez, S.<br>&<br>Jorgensen,<br>P.M.<br>(Ecuador<br>Plants Red<br>List<br>Authority) |
| 4335<br>0         | BROMELIA<br>CEAE | <i>Tillandsia<br/>spathacea</i>     | Mez<br>&<br>Sodiros | 2003               | 30/04/03            | NT       | NA        | Manzanare<br>s, J.M. &<br>Pitman, N.                                                                                                        | Valencia,<br>R., Pitman,<br>N., Leon-<br>Yanez, S.<br>&<br>Jorgensen,<br>P.M.<br>(Ecuador<br>Plants Red<br>List<br>Authority) |
| 1313<br>6887<br>9 | BROMELIA<br>CEAE | <i>Tillandsia<br/>stenoura</i>      | Harms               | 2019               | 4/02/19             | LC       | NA        | Trevino<br>Zevallos, I.                                                                                                                     | Pazmino,<br>M. &<br>Tognelli,<br>M.F.                                                                                         |
| 1366<br>6087<br>1 | BROMELIA<br>CEAE | <i>Tillandsia<br/>stipitata</i>     | L.B. Sm.            | 2019               | 20/11/18            | LC       | NA        | Betancur,<br>J., Aguirre-<br>Santoro,<br>J.A.,<br>Salinas, N.,<br>Lvarezpez,<br>M.,<br>Ramirez<br>Padilla, B.<br>& Toro<br>Murillo,<br>J.L. | Garcera,<br>N.                                                                                                                |

| taxo<br>nid       | family           | scientific_<br>name                   | authority            | published_<br>year | assessment<br>_date | category | criteria          | assessor                                                                                                                                | reviewer                                                                                                                      |
|-------------------|------------------|---------------------------------------|----------------------|--------------------|---------------------|----------|-------------------|-----------------------------------------------------------------------------------------------------------------------------------------|-------------------------------------------------------------------------------------------------------------------------------|
| 1313<br>4307<br>0 | BROMELIA<br>CEAE | <i>Tillandsia<br/>suescana</i>        | L.B.Sm.              | 2020               | 22/11/18            | EN       | B1ab(iii)         | Betancur,<br>J., Aguirre-<br>Santoro,<br>J.A.,<br>Salinas, N.,<br>López,<br>M.,<br>Ramírez<br>Padilla, B.<br>& Toro<br>Murillo,<br>J.L. | García,<br>N.                                                                                                                 |
| 1313<br>4307<br>3 | BROMELIA<br>CEAE | <i>Tillandsia<br/>ultima</i>          | L.B.Sm.              | 2019               | 22/11/18            | LC       | NA                | Betancur,<br>J., Aguirre-<br>Santoro,<br>J.A.,<br>Salinas, N.,<br>López,<br>M.,<br>Ramírez<br>Padilla, B.<br>& Toro<br>Murillo,<br>J.L. | García,<br>N.                                                                                                                 |
| 4335<br>1         | BROMELIA<br>CEAE | <i>Tillandsia<br/>umbellata</i>       | Andrés               | 2003               | 30/04/03            | EN       | B1ab(iii)         | Manzanare<br>s, J.M. &<br>Pitman, N.                                                                                                    | Valencia,<br>R., Pitman,<br>N., Leon-<br>Yanez, S.<br>&<br>Jorgensen,<br>P.M.<br>(Ecuador<br>Plants Red<br>List<br>Authority) |
| 1313<br>6890<br>5 | BROMELIA<br>CEAE | <i>Tillandsia<br/>usneoides</i>       | (L.) L.              | 2019               | 4/02/19             | LC       | NA                | Treviño<br>Zevallos, I.                                                                                                                 | Pazmino,<br>M. &<br>Tognelli,<br>M.F.                                                                                         |
| 4335<br>2         | BROMELIA<br>CEAE | <i>Tillandsia<br/>zarumensis</i>      | Gilmartin            | 2003               | 30/04/03            | EN       | B1ab(iii)         | Manzanare<br>s, J.M. &<br>Pitman, N.                                                                                                    | Valencia,<br>R., Pitman,<br>N., Leon-<br>Yanez, S.<br>&<br>Jorgensen,<br>P.M.<br>(Ecuador<br>Plants Red<br>List<br>Authority) |
| 4335<br>3         | BROMELIA<br>CEAE | <i>Vriesea<br/>andreetae</i>          | Rauh                 | 2003               | 30/04/03            | VU       | B1ab(iii)         | Manzanare<br>s, J.M. &<br>Pitman, N.                                                                                                    | Valencia,<br>R., Pitman,<br>N., Leon-<br>Yanez, S.<br>&<br>Jorgensen,<br>P.M.<br>(Ecuador<br>Plants Red<br>List<br>Authority) |
| 4335<br>4         | BROMELIA<br>CEAE | <i>Vriesea<br/>appendicul<br/>ata</i> | (L.B.Sm.)<br>L.B.Sm. | 2003               | 30/04/03            | EN       | A2a;<br>B1ab(iii) | Manzanare<br>s, J.M. &<br>Pitman, N.                                                                                                    | Valencia,<br>R., Pitman,<br>N., Leon-<br>Yanez, S.<br>&<br>Jorgensen,<br>P.M.<br>(Ecuador<br>Plants Red                       |

| taxo<br>nid       | family           | scientific_<br>name                   | authority                    | published_<br>year | assessment<br>_date | category | criteria               | assessor                                                                                             | reviewer                                                                                                                      |
|-------------------|------------------|---------------------------------------|------------------------------|--------------------|---------------------|----------|------------------------|------------------------------------------------------------------------------------------------------|-------------------------------------------------------------------------------------------------------------------------------|
|                   |                  |                                       |                              |                    |                     |          |                        |                                                                                                      | List<br>Authority)                                                                                                            |
| 4335<br>5         | BROMELIA<br>CEAE | <i>Vriesea<br/>arpcalyx</i>           | (Andrv®)<br>L.B.Sm.          | 2003               | 30/04/03            | NT       | NA                     | Manzanare<br>s, J.M. &<br>Pitman, N.                                                                 | Valencia,<br>R., Pitman,<br>N., Leon-<br>Yanez, S.<br>&<br>Jorgensen,<br>P.M.<br>(Ecuador<br>Plants Red<br>List<br>Authority) |
| 4439<br>2256      | BROMELIA<br>CEAE | <i>Vriesea<br/>bituminosa</i>         | Wawra                        | 2013               | 2/05/09             | LC       | NA                     | Romand-<br>Monnier, F.<br>& Contu,<br>S.                                                             | Scott, J.A.                                                                                                                   |
| 4335<br>6         | BROMELIA<br>CEAE | <i>Vriesea<br/>boeghii</i>            | H.Luther                     | 2003               | 30/04/03            | NT       | NA                     | Manzanare<br>s, J.M. &<br>Pitman, N.                                                                 | Valencia,<br>R., Pitman,<br>N., Leon-<br>Yanez, S.<br>&<br>Jorgensen,<br>P.M.<br>(Ecuador<br>Plants Red<br>List<br>Authority) |
| 4439<br>2223      | BROMELIA<br>CEAE | <i>Vriesea<br/>camptoclad<br/>a</i>   | Mez &<br>Wercklv©            | 2013               | 31/03/09            | VU       | B1ab(iii)              | Romand-<br>Monnier, F.<br>& Contu,<br>S.                                                             | Scott, J.A.                                                                                                                   |
| 4335<br>7         | BROMELIA<br>CEAE | <i>Vriesea<br/>drewii</i>             | L.B.Sm.                      | 2003               | 30/04/03            | EN       | B1ab(iii)              | Manzanare<br>s, J.M. &<br>Pitman, N.                                                                 | Valencia,<br>R., Pitman,<br>N., Leon-<br>Yanez, S.<br>&<br>Jorgensen,<br>P.M.<br>(Ecuador<br>Plants Red<br>List<br>Authority) |
| 4439<br>3417      | BROMELIA<br>CEAE | <i>Vriesea<br/>heliconioid<br/>es</i> | (Kunth)<br>Hook. ex<br>Walp. | 2013               | 3/11/09             | LC       | NA                     | Romand-<br>Monnier, F.<br>& Contu,<br>S.                                                             | Scott, J.A.                                                                                                                   |
| 4335<br>8         | BROMELIA<br>CEAE | <i>Vriesea<br/>limonensis</i>         | Rauh                         | 2003               | 30/04/03            | VU       | A2a;<br>B1ab(iii)      | Manzanare<br>s, J.M. &<br>Pitman, N.                                                                 | Valencia,<br>R., Pitman,<br>N., Leon-<br>Yanez, S.<br>&<br>Jorgensen,<br>P.M.<br>(Ecuador<br>Plants Red<br>List<br>Authority) |
| 1910<br>8313<br>1 | BROMELIA<br>CEAE | <i>Vriesea<br/>ospinae</i>            | H.Luther                     | 2022               | 19/11/19            | VU       | B1ab(iii)<br>+2ab(iii) | Betancur,<br>J., Aguirre-<br>Santoro,<br>J.A.,<br>Vallejo, L.<br>&<br>Bohv≥rque<br>z-Osorio,<br>A.F. | Garcv≠a,<br>N.                                                                                                                |

| taxo<br>nid       | family           | scientific_<br>name                        | authority                               | published_<br>year | assessment<br>_date | category | criteria          | assessor                                                                                                                                  | reviewer                                                                                                                      |
|-------------------|------------------|--------------------------------------------|-----------------------------------------|--------------------|---------------------|----------|-------------------|-------------------------------------------------------------------------------------------------------------------------------------------|-------------------------------------------------------------------------------------------------------------------------------|
| 4336<br>0         | BROMELIA<br>CEAE | <i>Vriesea<br/>pendulisca<br/>pa</i>       | Rauh                                    | 2003               | 30/04/03            | VU       | D2                | Manzanare<br>s, J.M. &<br>Pitman, N.                                                                                                      | Valencia,<br>R., Pitman,<br>N., Leon-<br>Yanez, S.<br>&<br>Jorgensen,<br>P.M.<br>(Ecuador<br>Plants Red<br>List<br>Authority) |
| 4336<br>1         | BROMELIA<br>CEAE | <i>Vriesea<br/>petraea</i>                 | (L.B.Sm.)<br>L.B.Sm.                    | 2003               | 30/04/03            | EN       | A2a;<br>B1ab(iii) | Manzanare<br>s, J.M. &<br>Pitman, N.                                                                                                      | Valencia,<br>R., Pitman,<br>N., Leon-<br>Yanez, S.<br>&<br>Jorgensen,<br>P.M.<br>(Ecuador<br>Plants Red<br>List<br>Authority) |
| 1366<br>6089<br>7 | BROMELIA<br>CEAE | <i>Vriesea<br/>robusta</i>                 | (Griseb.)<br>L.B. Sm.                   | 2019               | 19/11/18            | LC       | NA                | Betancur,<br>J., Aguirre-<br>Santoro,<br>J.A.,<br>Salinas, N.,<br>Lv≥pez,<br>M.,<br>Ramv≠rez<br>Padilla, B.<br>& Toro<br>Murillo,<br>J.L. | Garcv≠a,<br>N.                                                                                                                |
| 4439<br>3553      | BROMELIA<br>CEAE | <i>Vriesea<br/>sagasteguii</i>             | L.B.Sm.                                 | 2013               | 24/03/09            | DD       | NA                | Romand-<br>Monnier, F.<br>& Contu,<br>S.                                                                                                  | Scott, J.A.                                                                                                                   |
| 1910<br>6937<br>2 | BROMELIA<br>CEAE | <i>Vriesea<br/>vexillata</i>               | L.B.Sm.                                 | 2022               | 19/11/19            | LC       | NA                | Betancur,<br>J., Aguirre-<br>Santoro,<br>J.A.,<br>Vallejo, L.<br>&<br>Bohv≥rque<br>z-Osorio,<br>A.F.                                      | Garcv≠a,<br>N.                                                                                                                |
| 4336<br>4         | BROMELIA<br>CEAE | <i>Vriesea<br/>wuelfinghof<br/>fii</i>     | Rauh<br>&<br>E.Gross                    | 2003               | 30/04/03            | VU       | D2                | Manzanare<br>s, J.M. &<br>Pitman, N.                                                                                                      | Valencia,<br>R., Pitman,<br>N., Leon-<br>Yanez, S.<br>&<br>Jorgensen,<br>P.M.<br>(Ecuador<br>Plants Red<br>List<br>Authority) |
| 4439<br>2135      | ORCHIDAC<br>EAE  | <i>Acianthera<br/>chrysantha</i>           | (Lindl.)<br>Pridgeon &<br>M.W.Chas<br>e | 2013               | 18/02/10            | LC       | NA                | Brummitt,<br>N.                                                                                                                           | Rankou, H.                                                                                                                    |
| 4439<br>3049      | ORCHIDAC<br>EAE  | <i>Acianthera<br/>compressic<br/>aulis</i> | (Dod)<br>Pridgeon &<br>M.W.Chas<br>e    | 2013               | 13/08/09            | EN       | B1ab(iii)         | Dyson,<br>P.L.                                                                                                                            | Rankou, H.                                                                                                                    |
| 4439<br>2581      | ORCHIDAC<br>EAE  | <i>Acianthera<br/>hondurensi<br/>s</i>     | (Ames)<br>Pridgeon &                    | 2014               | 8/08/13             | LC       | NA                | Cockel, C.<br>&                                                                                                                           | Sayers, B.,<br>Archila, F.<br>&                                                                                               |

| taxo<br>nid       | family          | scientific_<br>name                     | authority                                            | published_<br>year | assessment<br>_date | category | criteria               | assessor                                                              | reviewer                       |
|-------------------|-----------------|-----------------------------------------|------------------------------------------------------|--------------------|---------------------|----------|------------------------|-----------------------------------------------------------------------|--------------------------------|
|                   |                 |                                         | M.W.Chase                                            |                    |                     |          |                        | Chadburn,<br>H.                                                       | Bogar≠n,<br>D.                 |
| 4439<br>3155      | ORCHIDAC<br>EAE | <i>Acianthera<br/>malachantha</i>       | (Rchb.f.)<br>Pridgeon &<br>M.W.Chase                 | 2013               | 23/07/09            | VU       | D2                     | Dyson,<br>P.L.                                                        | Rankou, H.                     |
| 2034<br>4363<br>1 | ORCHIDAC<br>EAE | <i>Acianthera<br/>nellyae</i>           | (P.Ortiz)<br>Karremans                               | 2021               | 18/12/20            | LC       | NA                     | Lopez-<br>Gallego, C.<br>& Morales<br>M, P.A.                         | Goettsch,<br>B.                |
| 4439<br>3326      | ORCHIDAC<br>EAE | <i>Acianthera<br/>saundersiana</i>      | (Rchb.f.)<br>Pridgeon &<br>M.W.Chase                 | 2013               | 25/09/09            | LC       | NA                     | Dyson,<br>P.L.                                                        | Rankou, H.                     |
| 4439<br>2351      | ORCHIDAC<br>EAE | <i>Acianthera<br/>scalpricaulis</i>     | (Luer)<br>Pridgeon &<br>M.W.Chase                    | 2013               | 30/07/12            | LC       | NA                     | Cockel, C.<br>&<br>Chadburn,<br>H.                                    | Rankou, H.                     |
| 4439<br>2841      | ORCHIDAC<br>EAE | <i>Acianthera<br/>tokachii</i>          | (Luer) Luer                                          | 2013               | 25/08/09            | VU       | D2                     | Dyson,<br>P.L.                                                        | Rankou, H.                     |
| 4439<br>2403      | ORCHIDAC<br>EAE | <i>Acianthera<br/>variegata</i>         | (Barb.Rodr.)<br>Campacci                             | 2013               | 27/08/09            | EN       | B1ab(iii)<br>+2ab(iii) | Romand-<br>Monnier, F.                                                | Rankou, H.                     |
| 4439<br>2572      | ORCHIDAC<br>EAE | <i>Acianthera<br/>violacea</i>          | (A.Rich. &<br>Galeotti)<br>Pridgeon &<br>M.W.Chase   | 2013               | 20/07/09            | LC       | NA                     | Dyson,<br>P.L. &<br>Bachman,<br>S.                                    | Rankou, H.                     |
| 1954<br>6382<br>7 | ORCHIDAC<br>EAE | <i>Acineta<br/>antioquiiae</i>          | Schltr.                                              | 2022               | 19/11/19            | CR       | B2ab(iii,<br>v)        | Aguirre,<br>G., Castro,<br>C., Morales<br>M, P.A. &<br>Ávila-R,<br>L. | Garcv≠a,<br>N. &<br>Rankou, H. |
| 4439<br>2517      | ORCHIDAC<br>EAE | <i>Anathallis<br/>guimaraensis</i>      | (Brade)<br>Luer &<br>Toscano                         | 2013               | 28/07/09            | VU       | D2                     | Dyson,<br>P.L.                                                        | Rankou, H.                     |
| 4439<br>2468      | ORCHIDAC<br>EAE | <i>Anathallis<br/>minutalis</i>         | (Lindl.)<br>Pridgeon &<br>M.W.Chase                  | 2013               | 26/06/09            | LC       | NA                     | Romand-<br>Monnier, F.                                                | Rankou, H.                     |
| 4439<br>2318      | ORCHIDAC<br>EAE | <i>Anathallis<br/>tigridens</i>         | (Loefgr.)<br>Luer &<br>Toscano                       | 2013               | 24/08/09            | EN       | B2ab(iii)              | Romand-<br>Monnier, F.                                                | Rankou, H.                     |
| 1954<br>6496<br>1 | ORCHIDAC<br>EAE | <i>Andinia<br/>monilia</i>              | (Luer &<br>R.Escobar)<br>Karremans<br>&<br>S.V.Uribe | 2022               | 21/11/19            | EN       | B2ab(iii)              | Moreno, S.,<br>Vieira-<br>Uribe, S. &<br>Ávila-R,<br>L.               | Garcv≠a,<br>N. &<br>Rankou, H. |
| 4439<br>3472      | ORCHIDAC<br>EAE | <i>Barbosella<br/>geminata</i>          | Luer                                                 | 2014               | 2/07/09             | NT       | NA                     | Cockel, C.<br>&<br>Chadburn,<br>H.                                    | Bogar≠n,<br>D.                 |
| 4439<br>2591      | ORCHIDAC<br>EAE | <i>Barkeria<br/>naevosa</i>             | (Lindl.)<br>Schltr.                                  | 2015               | 14/08/09            | LC       | NA                     | Chadburn,<br>H. &<br>Cockel, C.                                       | Rankou, H.                     |
| 4439<br>3661      | ORCHIDAC<br>EAE | <i>Brachionid<br/>ium<br/>capillare</i> | Luer &<br>Hirtz                                      | 2013               | 15/10/09            | VU       | D2                     | Cockel, C.                                                            | Rankou, H.                     |
| 4283<br>1264      | ORCHIDAC<br>EAE | <i>Brachionid<br/>ium<br/>diaphanum</i> | Luer<br>&<br>R.V. V <sup>o</sup> squez               | 2013               | 15/02/13            | VU       | D2                     | Lyon, J. &<br>Cockel, C.                                              | Rankou, H.                     |
| 4439<br>2252      | ORCHIDAC<br>EAE | <i>Brachionid<br/>ium<br/>dressleri</i> | Luer                                                 | 2013               | 3/09/10             | EN       | B1ab(v)                | Cockel, C.                                                            | Rankou, H.                     |
| 4439<br>3304      | ORCHIDAC<br>EAE | <i>Brachionid<br/>ium</i>               | Garay                                                | 2013               | 3/09/10             | LC       | NA                     | Cockel, C.                                                            | Rankou, H.                     |

| taxo<br>nid       | family          | scientific_<br>name               | authority                  | published_<br>year | assessment_<br>date | category | criteria     | assessor                                                                        | reviewer                              |
|-------------------|-----------------|-----------------------------------|----------------------------|--------------------|---------------------|----------|--------------|---------------------------------------------------------------------------------|---------------------------------------|
|                   |                 | <i>phalangiferum</i>              |                            |                    |                     |          |              |                                                                                 |                                       |
| 4439<br>3112      | ORCHIDAC<br>EAE | <i>Brachionidium pteroglossum</i> | Luer                       | 2013               | 3/04/09             | CR       | B1ab(iii)    | Cockel, C.                                                                      | Rankou, H.                            |
| 2248<br>6527      | ORCHIDAC<br>EAE | <i>Brassia lanceana</i>           | Lindl.                     | 2018               | 16/08/16            | LC       | NA           | Canteiro, C.                                                                    | Rankou, H.                            |
| 2248<br>6147      | ORCHIDAC<br>EAE | <i>Brassia maculata</i>           | R.Br.                      | 2018               | 15/11/16            | LC       | NA           | Canteiro, C.                                                                    | Rankou, H.                            |
| 4439<br>3503      | ORCHIDAC<br>EAE | <i>Brassia verrucosa</i>          | Bateman ex Lindl.          | 2013               | 25/11/09            | LC       | NA           | Romand-Monnier, F.                                                              | Rankou, H.                            |
| 2248<br>6332      | ORCHIDAC<br>EAE | <i>Brassia wagneri</i>            | Rchb.f.                    | 2018               | 19/07/16            | LC       | NA           | Canteiro, C.                                                                    | Rankou, H.                            |
| 2248<br>6375      | ORCHIDAC<br>EAE | <i>Broughtonia negrilensis</i>    | Fowlie                     | 2018               | 4/02/16             | EN       | B1ab(iii)    | Canteiro, C.                                                                    | Rankou, H.                            |
| 1264<br>8755<br>2 | ORCHIDAC<br>EAE | <i>Bulbophyllum chloranthum</i>   | Schltr.                    | 2019               | 29/10/18            | LC       | NA           | Chadburn, H. & Schuiteman, A.                                                   | Irawati, N.F.N.                       |
| 1264<br>8781<br>5 | ORCHIDAC<br>EAE | <i>Bulbophyllum ochroleucum</i>   | Schltr.                    | 2019               | 5/11/18             | LC       | NA           | Chadburn, H. & Schuiteman, A.                                                   | Rankou, H.                            |
| 1192<br>5128<br>2 | ORCHIDAC<br>EAE | <i>Bulbophyllum oreodoxa</i>      | Schltr.                    | 2019               | 13/02/18            | LC       | NA           | Chadburn, H. & Schuiteman, A.                                                   | Rankou, H.                            |
| 4439<br>3070      | ORCHIDAC<br>EAE | <i>Bulbophyllum regnellii</i>     | Rchb.f.                    | 2013               | 30/11/09            | LC       | NA           | Romand-Monnier, F.                                                              | Rankou, H.                            |
| 4439<br>2836      | ORCHIDAC<br>EAE | <i>Bulbophyllum sanderianum</i>   | Rolfe                      | 2013               | 12/10/09            | VU       | B2ab(iii)    | Romand-Monnier, F. & Chadburn, H.                                               | Rankou, H.                            |
| 4439<br>3321      | ORCHIDAC<br>EAE | <i>Campylocentrum spannagelii</i> | Hoehne                     | 2013               | 12/10/09            | DD       | NA           | Romand-Monnier, F. & Chadburn, H.                                               | Rankou, H.                            |
| 4439<br>2868      | ORCHIDAC<br>EAE | <i>Campylocentrum tyrridion</i>   | Garay & Dunst. ex Foldats  | 2014               | 26/08/09            | LC       | NA           | Romand-Monnier, F. & Chadburn, H.                                               | Archila, F., Bogar√n, D. & Romero, G. |
| 4439<br>2583      | ORCHIDAC<br>EAE | <i>Catasetum barbatum</i>         | (Lindl.) Lindl.            | 2013               | 14/12/09            | LC       | NA           | Romand-Monnier, F.                                                              | Rankou, H.                            |
| 4439<br>2660      | ORCHIDAC<br>EAE | <i>Catasetum globiflorum</i>      | Hook.                      | 2013               | 15/12/09            | DD       | NA           | Romand-Monnier, F. & Chadburn, H.                                               | Rankou, H.                            |
| 2248<br>6283      | ORCHIDAC<br>EAE | <i>Catasetum tuberculatum</i>     | Dodson                     | 2018               | 12/10/16            | LC       | NA           | Canteiro, C.                                                                    | Rankou, H.                            |
| 2248<br>6099      | ORCHIDAC<br>EAE | <i>Cattleya schroederae</i>       | Rchb.f.                    | 2022               | 20/11/19            | EN       | B2ab(iii, v) | Aguirre, G., Castro, C., Morales M, P.A., Moreno, S., Ospina, N. & √Avila-R, L. | Garcv≠a, N. & Rankou, H.              |
| 1159<br>4779<br>9 | ORCHIDAC<br>EAE | <i>Cochleanthes trinitatis</i>    | (Ames) R.E.Schult. & Garay | 2017               | 13/09/17            | EN       | B2ab(iii)    | Oatham, M., Van den Eynden, V.                                                  | Martv≠nez Richart, A.I.               |

| taxo<br>nid       | family          | scientific_<br>name                 | authority                             | published_<br>year | assessment<br>_date | category | criteria               | assessor                                                                                                                 | reviewer                       |
|-------------------|-----------------|-------------------------------------|---------------------------------------|--------------------|---------------------|----------|------------------------|--------------------------------------------------------------------------------------------------------------------------|--------------------------------|
|                   |                 |                                     |                                       |                    |                     |          |                        | & Johnson,<br>W.                                                                                                         |                                |
| 1505<br>1828      | ORCHIDAC<br>EAE | <i>Conchidium<br/>pusillum</i>      | Griff.                                | 2013               | 11/06/10            | LC       | NA                     | Cockel, C.                                                                                                               | Rankou, H.                     |
| 4439<br>2992      | ORCHIDAC<br>EAE | <i>Cyrtochilum<br/>halteratum</i>   | (Lindl.)<br>Kraenzl.                  | 2013               | 18/02/10            | LC       | NA                     | Brummitt,<br>N.                                                                                                          | Rankou, H.                     |
| 1954<br>6563<br>8 | ORCHIDAC<br>EAE | <i>Cyrtochilum<br/>misasiense</i>   | P.Ortiz                               | 2022               | 22/11/19            | EN       | B2ab(iii)              | Castro, C.,<br>Moreno, S.,<br>Ospina, N.,<br>Vieira-<br>Uribe, S.,<br>Parra, E. &<br>Ávila-R,<br>L.                      | Garcv#a,<br>N. &<br>Rankou, H. |
| 1954<br>6645<br>7 | ORCHIDAC<br>EAE | <i>Cyrtochilum<br/>rostratum</i>    | Schltr.                               | 2022               | 22/11/19            | DD       | NA                     | Castro, C.,<br>Moreno, S.,<br>Ospina, N.,<br>Vieira-<br>Uribe, S.,<br>Parra, E. &<br>Ávila-R,<br>L.                      | Garcv#a,<br>N. &<br>Rankou, H. |
| 1954<br>6568<br>5 | ORCHIDAC<br>EAE | <i>Cyrtochilum<br/>tenense</i>      | (Rchb. f.<br>&<br>Warsz.)<br>Kraenzl. | 2022               | 22/11/19            | DD       | NA                     | Dalstrv#m,<br>S., Castro,<br>C.,<br>Moreno, S.,<br>Ospina, N.,<br>Vieira-<br>Uribe, S.,<br>Parra, E. &<br>Ávila-R,<br>L. | Garcv#a,<br>N. &<br>Rankou, H. |
| 4439<br>2629      | ORCHIDAC<br>EAE | <i>Cyrtopodium<br/>brandonianum</i> | Barb.Rodr.                            | 2013               | 8/06/09             | LC       | NA                     | Romand-<br>Monnier, F.                                                                                                   | Rankou, H.                     |
| 1505<br>3780      | ORCHIDAC<br>EAE | <i>Dendrobium<br/>aphyllum</i>      | (Roxb.)<br>C.E.C.Fisc<br>h.           | 2013               | 8/06/09             | LC       | NA                     | Romand-<br>Monnier, F.                                                                                                   | Rankou, H.                     |
| 1192<br>5474<br>1 | ORCHIDAC<br>EAE | <i>Dendrobium<br/>atroviolaceum</i> | Rolfe                                 | 2018               | 3/04/18             | VU       | B1ab(iii)<br>+2ab(iii) | Chadburn,<br>H. &<br>Schuiteman<br>, A.                                                                                  | Rankou, H.                     |
| 1264<br>9566<br>5 | ORCHIDAC<br>EAE | <i>Dendrobium<br/>capra</i>         | J.J.Sm.                               | 2020               | 27/03/19            | EN       | B2ab(iii,<br>v)        | Chadburn,<br>H. &<br>Schuiteman<br>, A.                                                                                  | Rankou, H.                     |
| 2034<br>4595<br>9 | ORCHIDAC<br>EAE | <i>Dracula<br/>lemurella</i>        | Luer<br>&<br>R.Escobar                | 2021               | 18/12/20            | CR       | B2ab(iii,<br>v)        | Morales M,<br>P.A. &<br>Vieira-<br>Uribe, S.                                                                             | Lopez-<br>Gallego, C.          |
| 4439<br>2172      | ORCHIDAC<br>EAE | <i>Dracula<br/>ligiae</i>           | Luer &<br>R.Escobar                   | 2013               | 9/09/09             | DD       | NA                     | Romand-<br>Monnier, F.<br>&<br>Chadburn,<br>H.                                                                           | Rankou, H.                     |
| 2248<br>6477      | ORCHIDAC<br>EAE | <i>Dracula<br/>ripleyana</i>        | Luer                                  | 2014               | 27/11/13            | NT       | NA                     | Chadburn,<br>H. &<br>Khela, S.                                                                                           | Bogarv#n,<br>D.                |
| 2248<br>6311      | ORCHIDAC<br>EAE | <i>Dryadella<br/>cristata</i>       | Luer &<br>R.Escobar                   | 2018               | 2/06/16             | DD       | NA                     | Canteiro,<br>C.                                                                                                          | Rankou, H.                     |
| 2248<br>6306      | ORCHIDAC<br>EAE | <i>Dryadella<br/>minuscula</i>      | Luer &<br>R.Escobar                   | 2018               | 15/08/16            | LC       | NA                     | Canteiro,<br>C.                                                                                                          | Rankou, H.                     |
| 1381<br>9246<br>4 | ORCHIDAC<br>EAE | <i>Elleanthus<br/>cinnabarinus</i>  | Garay                                 | 2022               | 9/02/19             | CR       | B2ab(iii)              | Castro, C.<br>& Vieira-<br>Uribe, S.                                                                                     | Garcv#a,<br>N. &<br>Rankou, H. |

| taxo<br>nid       | family          | scientific_<br>name                            | authority                                              | published_<br>year | assessment<br>_date | category | criteria               | assessor                                                                              | reviewer                              |
|-------------------|-----------------|------------------------------------------------|--------------------------------------------------------|--------------------|---------------------|----------|------------------------|---------------------------------------------------------------------------------------|---------------------------------------|
| 4439<br>2307      | ORCHIDAC<br>EAE | <i>Elleanthus<br/>oliganthus</i>               | (Poepp. &<br>Endl.)<br>Rchb.f.                         | 2013               | 8/05/09             | LC       | NA                     | Romand-<br>Monnier, F.                                                                | Rankou, H.                            |
| 1672<br>6345      | ORCHIDAC<br>EAE | <i>Encyclia<br/>caicensis</i>                  | Sauleda<br>&<br>R.M.Adam<br>s 1978                     | 2012               | 27/04/10            | EN       | B1ab(iii)<br>+2ab(iii) | Williams,<br>S., Clubbe,<br>C. &<br>Hamilton,<br>M.                                   | Rankou, H.<br>& Hilton-<br>Taylor, C. |
| 5523<br>3637      | ORCHIDAC<br>EAE | <i>Encyclia<br/>osmantha</i>                   | (Barb.Rodr<br>) Schltr.                                | 2018               | 5/08/16             | LC       | NA                     | Canteiro,<br>C.                                                                       | Rankou, H.                            |
| 6207<br>8436      | ORCHIDAC<br>EAE | <i>Encyclia<br/>phoenicea</i>                  | (Lindl.)<br>Neumann                                    | 2014               | 17/07/14            | LC       | NA                     | Roberts, A.                                                                           | Rankou, H.                            |
| 1584<br>5910<br>0 | ORCHIDAC<br>EAE | <i>Encyclia<br/>plicata</i>                    | (Lindl.)<br>Schltr.                                    | 2020               | 19/09/19            | EN       | B2ab(ii,ii<br>i,iv,v)  | Oviedo, R.,<br>Hechavarr<br>a, J., Freid,<br>E.H.,<br>Becquer, E.<br>& Morales,<br>A. | Rodríguez<br>Cala, D.                 |
| 4439<br>3496      | ORCHIDAC<br>EAE | <i>Encyclia<br/>spatella</i>                   | (Rchb.f.)<br>Schltr.                                   | 2015               | 3/06/10             | LC       | NA                     | Chadburn,<br>H.                                                                       | Rankou, H.                            |
| 2248<br>6346      | ORCHIDAC<br>EAE | <i>Epidendru<br/>m<br/>capricornu</i>          | Kraenzl.                                               | 2017               | 14/01/16            | LC       | NA                     | Canteiro,<br>C.                                                                       | Pinheiro, F.                          |
| 2248<br>6261      | ORCHIDAC<br>EAE | <i>Epidendru<br/>m<br/>carnevalii</i>          | Hv <sup>o</sup> gsater<br>&<br>L.Sv <sup>o</sup> nchez | 2018               | 20/01/16            | LC       | NA                     | Canteiro,<br>C.                                                                       | Rankou, H.                            |
| 4439<br>2750      | ORCHIDAC<br>EAE | <i>Epidendru<br/>m<br/>criniferum</i>          | Rchb.f.                                                | 2013               | 25/11/09            | LC       | NA                     | Romand-<br>Monnier, F.<br>&<br>Chadburn,<br>H.                                        | Rankou, H.                            |
| 4439<br>2619      | ORCHIDAC<br>EAE | <i>Epidendru<br/>m<br/>diothonaeo<br/>ides</i> | Schltr.                                                | 2013               | 24/11/11            | VU       | B1ab(i,iii<br>)        | Groom, A.                                                                             | Rankou, H.                            |
| 2248<br>6560      | ORCHIDAC<br>EAE | <i>Epidendru<br/>m<br/>dorsocarin<br/>atum</i> | Hv <sup>o</sup> gsater                                 | 2017               | 18/05/16            | DD       | NA                     | Canteiro,<br>C.                                                                       | Salazar<br>Ch <sup>o</sup> vez,<br>G. |
| 4439<br>3448      | ORCHIDAC<br>EAE | <i>Epidendru<br/>m<br/>gentryi</i>             | Dodson                                                 | 2015               | 1/01/10             | LC       | NA                     | Chadburn,<br>H.                                                                       | Rankou, H.                            |
| 1159<br>4796<br>9 | ORCHIDAC<br>EAE | <i>Epidendru<br/>m<br/>hombersley<br/>i</i>    | Summerh.                                               | 2017               | 13/09/17            | VU       | B1ab(iii)<br>+2ab(iii) | Oatham,<br>M., Van<br>den<br>Eynden, V.<br>& Johnson,<br>W.                           | Martínez<br>Richart,<br>A.I.          |
| 2034<br>4329<br>1 | ORCHIDAC<br>EAE | <i>Epidendru<br/>m<br/>ibaguense</i>           | Kunth                                                  | 2021               | 18/12/20            | LC       | NA                     | Lopez-<br>Gallego, C.<br>& Morales<br>M, P.A.                                         | Goetsch,<br>B.                        |
| 1381<br>9248<br>1 | ORCHIDAC<br>EAE | <i>Epidendru<br/>m<br/>magnibract<br/>eum</i>  | Kraenzl.                                               | 2022               | 9/02/19             | EN       | B2ab(ii,ii<br>i)       | Castro, C.<br>& Vieira-<br>Uribe, S.                                                  | García,<br>N. &<br>Rankou, H.         |
| 4439<br>3172      | ORCHIDAC<br>EAE | <i>Epidendru<br/>m<br/>microphyll<br/>um</i>   | Lindl.                                                 | 2013               | 8/03/09             | LC       | NA                     | Romand-<br>Monnier, F.                                                                | Rankou, H.                            |
| 2248<br>6344      | ORCHIDAC<br>EAE | <i>Epidendru<br/>m<br/>neudeckeri</i>          | Dodson &<br>Hv <sup>o</sup> gsater                     | 2017               | 6/07/16             | EN       | B1ab(iii)              | Canteiro,<br>C.                                                                       | Pinheiro, F.                          |
| 4439<br>2497      | ORCHIDAC<br>EAE | <i>Epidendru<br/>m<br/>oerstedii</i>           | Rchb.f.                                                | 2013               | 12/01/09            | LC       | NA                     | Romand-<br>Monnier, F.                                                                | Rankou, H.                            |
| 2248<br>6235      | ORCHIDAC<br>EAE | <i>Epidendru<br/>m<br/>paniculatu<br/>m</i>    | Ruiz &<br>Pav.                                         | 2018               | 18/05/16            | DD       | NA                     | Canteiro,<br>C.                                                                       | Rankou, H.                            |

| taxo<br>nid       | family          | scientific_<br>name                             | authority                                                            | published_<br>year | assessment<br>_date | category | criteria               | assessor                                                                               | reviewer                       |
|-------------------|-----------------|-------------------------------------------------|----------------------------------------------------------------------|--------------------|---------------------|----------|------------------------|----------------------------------------------------------------------------------------|--------------------------------|
| 1954<br>6711<br>7 | ORCHIDAC<br>EAE | <i>Epidendru<br/>m pazii</i>                    | Hv <sup>o</sup> gsater                                               | 2022               | 22/11/19            | EN       | B1ab(iii)<br>+2ab(iii) | Castro, C.,<br>Moreno, S.,<br>Ospina, N.,<br>Vieira-<br>Uribe, S. &<br>√Ávila-R,<br>L. | Garcv#a,<br>N. &<br>Rankou, H. |
| 4439<br>2389      | ORCHIDAC<br>EAE | <i>Epidendru<br/>m<br/>proligerum</i>           | Barb.Rodr.                                                           | 2013               | 26/01/10            | LC       | NA                     | Romand-<br>Monnier, F.                                                                 | Rankou, H.                     |
| 2034<br>4465<br>0 | ORCHIDAC<br>EAE | <i>Epidendru<br/>m<br/>quinquecall<br/>osum</i> | Schltr.                                                              | 2021               | 18/12/20            | DD       | NA                     | Lopez-<br>Gallego, C.<br>& Morales<br>M, P.A.                                          | Goetsch,<br>B.                 |
| 2248<br>6298      | ORCHIDAC<br>EAE | <i>Epidendru<br/>m ramosum</i>                  | Jacq.                                                                | 2017               | 12/01/16            | LC       | NA                     | Canteiro,<br>C.                                                                        | Pinheiro, F.                   |
| 1381<br>9249<br>2 | ORCHIDAC<br>EAE | <i>Epidendru<br/>m<br/>sumapacen<br/>se</i>     | Hv <sup>o</sup> gsater<br>&<br>E.Santiago                            | 2022               | 9/02/19             | LC       | NA                     | Castro, C.<br>& Vieira-<br>Uribe, S.                                                   | Garcv#a,<br>N. &<br>Rankou, H. |
| 2248<br>6419      | ORCHIDAC<br>EAE | <i>Epidendru<br/>m<br/>tigriphyllu<br/>m</i>    | Hv <sup>o</sup> gsater                                               | 2018               | 17/02/16            | EN       | B2ab(iii)              | Canteiro,<br>C.                                                                        | Rankou, H.                     |
| 2248<br>6097      | ORCHIDAC<br>EAE | <i>Epidendru<br/>m<br/>torraense</i>            | Hv <sup>o</sup> gsater<br>& Silverst.                                | 2018               | 30/09/16            | DD       | NA                     | Canteiro,<br>C.                                                                        | Rankou, H.                     |
| 1393<br>6084<br>1 | ORCHIDAC<br>EAE | <i>Epidendru<br/>m uribei</i>                   | A.D.<br>Hawkes                                                       | 2022               | 22/11/19            | CR       | B1ab(iii)              | Castro, C.,<br>Moreno, S.,<br>Ospina, N.,<br>Vieira-<br>Uribe, S. &<br>√Ávila-R,<br>L. | Garcv#a,<br>N. &<br>Rankou, H. |
| 2034<br>4302<br>4 | ORCHIDAC<br>EAE | <i>Fernandezi<br/>a myrtilus</i>                | (Rchb.f.)<br>Garay<br>&<br>Dunst.                                    | 2021               | 18/12/20            | LC       | NA                     | Lopez-<br>Gallego, C.<br>& Morales<br>M, P.A.                                          | Goetsch,<br>B.                 |
| 2248<br>6412      | ORCHIDAC<br>EAE | <i>Galeottia<br/>fimbriata</i>                  | (Linden &<br>Rchb.f.)<br>Schltr.                                     | 2015               | 6/11/13             | LC       | NA                     | Khela, S.                                                                              | Rankou, H.                     |
| 4439<br>2843      | ORCHIDAC<br>EAE | <i>Gomesa<br/>sessilis</i>                      | Barb.Rodr.                                                           | 2013               | 2/04/10             | LC       | NA                     | Romand-<br>Monnier, F.<br>&<br>Chadburn,<br>H.                                         | Rankou, H.                     |
| 2248<br>6488      | ORCHIDAC<br>EAE | <i>Gomesa<br/>silvana</i>                       | (V.P.Castro<br>&<br>Campacci)<br>M.W.Chas<br>e &<br>N.H.Willia<br>ms | 2014               | 8/11/13             | EN       | B1ab(iii)              | Chadburn,<br>H. &<br>Romand-<br>Monnier, F.                                            | Pinheiro, F.                   |
| 2248<br>6456      | ORCHIDAC<br>EAE | <i>Gongora<br/>arcuata</i>                      | G.Gerlach<br>& Toulem.                                               | 2018               | 4/10/16             | VU       | B1ab(iii)              | Canteiro,<br>C.                                                                        | Rankou, H.                     |
| 2248<br>6239      | ORCHIDAC<br>EAE | <i>Gongora<br/>portentosa</i>                   | Linden &<br>Rchb.f.                                                  | 2018               | 27/05/16            | LC       | NA                     | Canteiro,<br>C.                                                                        | Rankou, H.                     |
| 2248<br>6231      | ORCHIDAC<br>EAE | <i>Grandiphyl<br/>lum<br/>schunkeanu<br/>m</i>  | (Campacci<br>& Cath.)<br>Campacci                                    | 2014               | 28/08/13            | CR       | B1ab(iii)              | Chadburn,<br>H. &<br>Romand-<br>Monnier, F.                                            | Pinheiro, F.                   |
| 4283<br>1252      | ORCHIDAC<br>EAE | <i>Huntleya<br/>vargasii</i>                    | Dodson<br>&<br>D.E.Benn.                                             | 2013               | 17/01/13            | NT       | NA                     | Chadburn,<br>H.                                                                        | Rankou, H.                     |
| 4439<br>3374      | ORCHIDAC<br>EAE | <i>Inti<br/>chartacifoli<br/>a</i>              | (Ames &<br>C.Schweinf<br>)<br>M.A.Blanc<br>o                         | 2013               | 12/03/09            | LC       | NA                     | Romand-<br>Monnier, F.<br>&<br>Chadburn,<br>H.                                         | Rankou, H.                     |

| taxo<br>nid       | family          | scientific_<br>name             | authority                                   | published_<br>year | assessment<br>_date | category | criteria                       | assessor                                                | reviewer                       |
|-------------------|-----------------|---------------------------------|---------------------------------------------|--------------------|---------------------|----------|--------------------------------|---------------------------------------------------------|--------------------------------|
| 4439<br>2566      | ORCHIDAC<br>EAE | <i>Lankesterella gnomus</i>     | (Kraenzl.)<br>Hoehne                        | 2013               | 28/09/09            | NT       | NA                             | Romand-<br>Monnier, F.<br>& Groom,<br>A.                | Rankou, H.                     |
| 4439<br>2272      | ORCHIDAC<br>EAE | <i>Leochilus leochilinus</i>    | (Rchb.f.)<br>M.W.Chase<br>&<br>N.H.Williams | 2013               | 12/02/09            | LC       | NA                             | Romand-<br>Monnier, F.                                  | Rankou, H.                     |
| 1381<br>9250<br>6 | ORCHIDAC<br>EAE | <i>Lepanthes arbuscula</i>      | Luer<br>&<br>R.Escobar                      | 2022               | 9/02/19             | EN       | B1ab(iii)<br>+2ab(iii)         | Vieira-<br>Uribe, S. &<br>Castro, C.                    | Garcv#a,<br>N. &<br>Rankou, H. |
| 2248<br>6296      | ORCHIDAC<br>EAE | <i>Lepanthes binaria</i>        | Luer &<br>Hirtz                             | 2018               | 14/09/16            | EN       | B1ab(iii)<br>+2ab(iii)         | Canteiro,<br>C.                                         | Rankou, H.                     |
| 1954<br>6666<br>8 | ORCHIDAC<br>EAE | <i>Lepanthes cingens</i>        | Luer<br>&<br>R.Escobar                      | 2022               | 22/11/19            | EN       | B1ab(iii,<br>v)+2ab(ii<br>i,v) | Moreno, S.,<br>Vieira-<br>Uribe, S. &<br>Ávila-R,<br>L. | Garcv#a,<br>N. &<br>Rankou, H. |
| 4439<br>3021      | ORCHIDAC<br>EAE | <i>Lepanthes erythrocles</i>    | Luer &<br>R.Escobar                         | 2013               | 27/02/09            | DD       | NA                             | Romand-<br>Monnier, F.                                  | Rankou, H.                     |
| 1393<br>6115<br>8 | ORCHIDAC<br>EAE | <i>Lepanthes felis</i>          | Luer<br>&<br>R.<br>Escobar                  | 2022               | 21/11/19            | LC       | NA                             | Moreno, S.,<br>Vieira-<br>Uribe, S. &<br>Ávila-R,<br>L. | Garcv#a,<br>N. &<br>Rankou, H. |
| 1954<br>6685<br>7 | ORCHIDAC<br>EAE | <i>Lepanthes fibulifera</i>     | Luer<br>&<br>R.Escobar                      | 2022               | 21/11/19            | EN       | B1ab(iii,<br>v)+2ab(ii<br>i,v) | Moreno, S.,<br>Vieira-<br>Uribe, S. &<br>Ávila-R,<br>L. | Garcv#a,<br>N. &<br>Rankou, H. |
| 2034<br>4274<br>4 | ORCHIDAC<br>EAE | <i>Lepanthes golondrina</i>     | Luer<br>&<br>R.Escobar                      | 2021               | 18/12/20            | EN       | B1ab(iii,<br>v)                | Morales M,<br>P.A. &<br>Vieira-<br>Uribe, S.            | Lopez-<br>Gallego, C.          |
| 2248<br>6441      | ORCHIDAC<br>EAE | <i>Lepanthes lancifolia</i>     | Schltr.                                     | 2018               | 22/09/16            | DD       | NA                             | Canteiro,<br>C.                                         | Rankou, H.                     |
| 4439<br>2596      | ORCHIDAC<br>EAE | <i>Lepanthes lindleyana</i>     | Oerst. &<br>Rchb.f.                         | 2013               | 28/05/09            | LC       | NA                             | Contu, S.                                               | Rankou, H.                     |
| 4439<br>2343      | ORCHIDAC<br>EAE | <i>Lepanthes mucronata</i>      | Lindl.                                      | 2013               | 27/05/09            | LC       | NA                             | Contu, S.                                               | Rankou, H.                     |
| 1381<br>9260<br>9 | ORCHIDAC<br>EAE | <i>Lepanthes oreibates</i>      | Luer<br>&<br>R.Escobar                      | 2022               | 9/02/19             | EN       | B2ab(iii)                      | Vieira-<br>Uribe, S. &<br>Castro, C.                    | Garcv#a,<br>N. &<br>Rankou, H. |
| 1381<br>9261<br>3 | ORCHIDAC<br>EAE | <i>Lepanthes osiris</i>         | Luer<br>&<br>R.Escobar                      | 2022               | 9/02/19             | EN       | B2ab(iii)                      | Vieira-<br>Uribe, S. &<br>Castro, C.                    | Garcv#a,<br>N. &<br>Rankou, H. |
| 1381<br>9261<br>7 | ORCHIDAC<br>EAE | <i>Lepanthes paramosolensis</i> | S.V.Uribe<br>&<br>B.T.Larsen                | 2022               | 9/02/19             | LC       | NA                             | Vieira-<br>Uribe, S. &<br>Castro, C.                    | Garcv#a,<br>N. &<br>Rankou, H. |
| 1954<br>6682<br>1 | ORCHIDAC<br>EAE | <i>Lepanthes parmata</i>        | Luer<br>&<br>R.Escobar                      | 2022               | 21/11/19            | EN       | B1ab(iii,<br>v)+2ab(ii<br>i,v) | Moreno, S.,<br>Vieira-<br>Uribe, S. &<br>Ávila-R,<br>L. | Garcv#a,<br>N. &<br>Rankou, H. |
| 2248<br>6408      | ORCHIDAC<br>EAE | <i>Lepanthes pilosa</i>         | Luer &<br>R.V. Viquez                       | 2018               | 16/09/16            | DD       | NA                             | Canteiro,<br>C.                                         | Rankou, H.                     |
| 2248<br>6146      | ORCHIDAC<br>EAE | <i>Lepanthes prolifera</i>      | Foldats                                     | 2018               | 12/09/16            | LC       | NA                             | Canteiro,<br>C.                                         | Rankou, H.                     |
| 2248<br>6222      | ORCHIDAC<br>EAE | <i>Lepanthes sinuosa</i>        | Luer &<br>R.Escobar                         | 2018               | 6/04/16             | CR       | B2ab(iii)                      | Canteiro,<br>C.                                         | Rankou, H.                     |
| 2248<br>6305      | ORCHIDAC<br>EAE | <i>Lepanthes systole</i>        | Luer                                        | 2018               | 4/08/16             | VU       | B1ab(iii)<br>+2ab(iii)         | Canteiro,<br>C.                                         | Rankou, H.                     |
| 4439<br>3486      | ORCHIDAC<br>EAE | <i>Lueddemanina pescatorei</i>  | (Lindl.)<br>Linden &<br>Rchb.f.             | 2013               | 14/09/09            | LC       | NA                             | Celesti, M.<br>& Groom,<br>A.                           | Rankou, H.                     |

| taxo<br>nid       | family          | scientific_<br>name                        | authority                                        | published_<br>year | assessment<br>_date | category | criteria                       | assessor                                                                          | reviewer                        |
|-------------------|-----------------|--------------------------------------------|--------------------------------------------------|--------------------|---------------------|----------|--------------------------------|-----------------------------------------------------------------------------------|---------------------------------|
| 2248<br>6435      | ORCHIDAC<br>EAE | <i>Macradeni<br/>a paraensis</i>           | Barb.Rodr.                                       | 2014               | 2/04/10             | LC       | NA                             | Chadburn,<br>H. &<br>Romand-<br>Monnier, F.                                       | Trujillo, D.<br>& Koch,<br>A.K. |
| 4439<br>2250      | ORCHIDAC<br>EAE | <i>Masdevalli<br/>a apparitio</i>          | Luer &<br>R.Escobar                              | 2013               | 9/03/09             | CR       | B1ab(iii)                      | Romand-<br>Monnier, F.                                                            | Rankou, H.                      |
| 1381<br>9262<br>7 | ORCHIDAC<br>EAE | <i>Masdevalli<br/>a assurgens</i>          | Luer<br>&<br>R.Escobar                           | 2022               | 9/02/19             | LC       | NA                             | Castro, C.<br>& Vieira-<br>Uribe, S.                                              | Garcv#a,<br>N. &<br>Rankou, H.  |
| 4283<br>1258      | ORCHIDAC<br>EAE | <i>Masdevalli<br/>a atahualpa</i>          | Luer                                             | 2013               | 6/02/13             | EN       | B2ab(iii)                      | Chadburn,<br>H.                                                                   | Rankou, H.                      |
| 4439<br>2293      | ORCHIDAC<br>EAE | <i>Masdevalli<br/>a gargantua</i>          | Rchb.f.                                          | 2013               | 1/09/09             | DD       | NA                             | Romand-<br>Monnier, F.                                                            | Rankou, H.                      |
| 1182<br>6360<br>5 | ORCHIDAC<br>EAE | <i>Masdevalli<br/>a ignea</i>              | Rchb.f.                                          | 2022               | 9/02/19             | EN       | B1ab(iii)<br>+2ab(iii)         | Castro, C.<br>& Vieira-<br>Uribe, S.                                              | Garcv#a,<br>N. &<br>Rankou, H.  |
| 1381<br>9266<br>1 | ORCHIDAC<br>EAE | <i>Masdevalli<br/>a medusa</i>             | Luer<br>&<br>R.Escobar                           | 2022               | 9/02/19             | EN       | B1ab(iii)<br>+2ab(iii)         | Castro, C.<br>& Vieira-<br>Uribe, S.                                              | Garcv#a,<br>N. &<br>Rankou, H.  |
| 2248<br>6536      | ORCHIDAC<br>EAE | <i>Masdevalli<br/>a notosibiric<br/>a</i>  | Maek.<br>&<br>T.Hashim.                          | 2014               | 20/11/13            | VU       | B1ab(iii)                      | Khela, S.                                                                         | Trujillo, D.                    |
| 2248<br>6219      | ORCHIDAC<br>EAE | <i>Masdevalli<br/>a oreas</i>              | Luer<br>&<br>R.V√°sque<br>z                      | 2014               | 21/11/13            | NT       | NA                             | Khela, S. &<br>Chadburn,<br>H.                                                    | Trujillo, D.                    |
| 1381<br>9266<br>5 | ORCHIDAC<br>EAE | <i>Masdevalli<br/>a racemosa</i>           | Lindl.                                           | 2022               | 9/02/19             | VU       | B1ab(iii,<br>v)+2ab(ii<br>i,v) | Castro, C.<br>& Vieira-<br>Uribe, S.                                              | Garcv#a,<br>N. &<br>Rankou, H.  |
| 4439<br>2363      | ORCHIDAC<br>EAE | <i>Masdevalli<br/>a strumifera</i>         | Rchb.f.                                          | 2013               | 26/08/09            | LC       | NA                             | Romand-<br>Monnier, F.<br>& Contu,<br>S.                                          | Rankou, H.                      |
| 4439<br>2578      | ORCHIDAC<br>EAE | <i>Maxillaria<br/>angustiseg<br/>menta</i> | Ames &<br>C.Schweinf<br>.                        | 2013               | 12/02/09            | LC       | NA                             | Romand-<br>Monnier, F.<br>&<br>Chadburn,<br>H.                                    | Rankou, H.                      |
| 4439<br>3393      | ORCHIDAC<br>EAE | <i>Mormodes<br/>auriculata</i>             | F.E.L.Mira<br>nda                                | 2013               | 27/08/09            | DD       | NA                             | Romand-<br>Monnier, F.                                                            | Rankou, H.                      |
| 4439<br>3599      | ORCHIDAC<br>EAE | <i>Mormolyca<br/>acutifolia</i>            | (Lindl.)<br>M.A.Blanc<br>o                       | 2013               | 30/09/09            | LC       | NA                             | Celesti, M.                                                                       | Rankou, H.                      |
| 4439<br>2502      | ORCHIDAC<br>EAE | <i>Mormolyca<br/>hedwigiae</i>             | (Hamer &<br>Dodson)<br>M.A.Blanc<br>o            | 2013               | 12/03/09            | LC       | NA                             | Romand-<br>Monnier, F.<br>&<br>Chadburn,<br>H.                                    | Rankou, H.                      |
| 2248<br>6135      | ORCHIDAC<br>EAE | <i>Notylia<br/>inversa</i>                 | Barb.Rodr.                                       | 2013               | 15/01/10            | DD       | NA                             | Romand-<br>Monnier, F.                                                            | Rankou, H.                      |
| 2248<br>6521      | ORCHIDAC<br>EAE | <i>Octomeria<br/>rodeiensis</i>            | Barb.Rodr.                                       | 2013               | 25/01/10            | DD       | NA                             | Romand-<br>Monnier, F.<br>&<br>Chadburn,<br>H.                                    | Rankou, H.                      |
| 4439<br>2728      | ORCHIDAC<br>EAE | <i>Octomeria<br/>taracuana</i>             | Schltr.                                          | 2013               | 20/01/10            | LC       | NA                             | Romand-<br>Monnier, F.                                                            | Rankou, H.                      |
| 4439<br>2733      | ORCHIDAC<br>EAE | <i>Oeceoclade<br/>s maculata</i>           | (Lindl.)<br>Lindl.                               | 2013               | 8/06/09             | LC       | NA                             | Romand-<br>Monnier, F.                                                            | Rankou, H.                      |
| 1955<br>1224<br>7 | ORCHIDAC<br>EAE | <i>Oncidium<br/>cuculligeru<br/>m</i>      | (Schltr.)<br>M.W.Chas<br>e &<br>N.H.Willia<br>ms | 2022               | 22/11/19            | EN       | B1ab(iii,<br>v)+2ab(ii<br>i,v) | Castro, C.,<br>Moreno, S.,<br>Vieira-<br>Uribe, S.,<br>Ospina, N.,<br>Parra, E. & | Garcv#a,<br>N. &<br>Rankou, H.  |

| taxo<br>nid       | family          | scientific_<br>name                             | authority                                              | published_<br>year | assessment<br>_date | category | criteria                                                                   | assessor                                                                                             | reviewer                        |
|-------------------|-----------------|-------------------------------------------------|--------------------------------------------------------|--------------------|---------------------|----------|----------------------------------------------------------------------------|------------------------------------------------------------------------------------------------------|---------------------------------|
|                   |                 |                                                 |                                                        |                    |                     |          |                                                                            | √Ávila-R,<br>L.                                                                                      |                                 |
| 2248<br>6120      | ORCHIDAC<br>EAE | <i>Oncidium<br/>dactyliferu<br/>m</i>           | Garay &<br>Dunst.                                      | 2018               | 28/06/16            | LC       | NA                                                                         | Canteiro,<br>C.                                                                                      | Rankou, H.                      |
| 1954<br>6911<br>2 | ORCHIDAC<br>EAE | <i>Oncidium<br/>decorum</i>                     | K√∂niger                                               | 2022               | 22/11/19            | EN       | B1ab(iii,<br>v)+2ab(ii<br>i,v)                                             | Castro, C.,<br>Moreno, S.,<br>Vieira-<br>Uribe, S.,<br>Ospina, N.,<br>Parra, E. &<br>√Ávila-R,<br>L. | Garcv≠a,<br>N. &<br>Rankou, H.  |
| 2248<br>6250      | ORCHIDAC<br>EAE | <i>Oncidium<br/>hastilabium</i>                 | (Lindl.)<br>Beer                                       | 2018               | 29/07/16            | LC       | NA                                                                         | Canteiro,<br>C.                                                                                      | Rankou, H.                      |
| 4439<br>2383      | ORCHIDAC<br>EAE | <i>Oncidium<br/>lancifolium</i>                 | Lindl.                                                 | 2013               | 20/07/09            | LC       | NA                                                                         | Dyson,<br>P.L. &<br>Bachman,<br>S.                                                                   | Rankou, H.                      |
| 1955<br>1233<br>4 | ORCHIDAC<br>EAE | <i>Oncidium<br/>lehmannian<br/>um</i>           | (Kraenzl.)<br>M.W.Chas<br>e &<br>N.H.Willia<br>ms      | 2022               | 22/11/19            | LC       | NA                                                                         | Castro, C.,<br>Moreno, S.,<br>Vieira-<br>Uribe, S.,<br>Ospina, N.,<br>Parra, E. &<br>√Ávila-R,<br>L. | Garcv≠a,<br>N. &<br>Rankou, H.  |
| 2248<br>6549      | ORCHIDAC<br>EAE | <i>Oncidium<br/>planilabre</i>                  | Lindl.                                                 | 2018               | 25/10/16            | LC       | NA                                                                         | Canteiro,<br>C.                                                                                      | Rankou, H.                      |
| 2248<br>6499      | ORCHIDAC<br>EAE | <i>Oncidium<br/>tenuifolium</i>                 | (Dalstr√∂m<br>)<br>M.W.Chas<br>e &<br>N.H.Willia<br>ms | 2014               | 18/10/13            | LC       | NA                                                                         | Khela, S. &<br>Chadburn,<br>H.                                                                       | Trujillo, D.<br>& Soto,<br>C.R. |
| 4439<br>2853      | ORCHIDAC<br>EAE | <i>Orleanesia<br/>amazonica</i>                 | Barb.Rodr.                                             | 2013               | 19/08/09            | LC       | NA                                                                         | Romand-<br>Monnier, F.<br>&<br>Chadburn,<br>H.                                                       | Rankou, H.                      |
| 1954<br>6993<br>0 | ORCHIDAC<br>EAE | <i>Paphinia<br/>seegeri</i>                     | G.Gerlach                                              | 2022               | 22/11/19            | LC       | NA                                                                         | Castro, C.,<br>Moreno, S.,<br>Vieira-<br>Uribe, S.,<br>Ospina, N.<br>& √Ávila-<br>R, L.              | Garcv≠a,<br>N. &<br>Rankou, H.  |
| 2018<br>58        | ORCHIDAC<br>EAE | <i>Paphiopedi<br/>lum<br/>villosum</i>          | (Lindl.)<br>Stein                                      | 2015               | 27/10/14            | VU       | B2ab(ii,ii<br>i,v)                                                         | Kumar, P.<br>& Rankou,<br>H.                                                                         | Fay, M.                         |
| 4332<br>4087      | ORCHIDAC<br>EAE | <i>Phragmipe<br/>dium<br/>andreettae</i>        | P.J.Cribb<br>&<br>Pupulin                              | 2016               | 22/07/15            | CR       | A3cd+4c<br>d;<br>B1ab(ii,i<br>v,v)+2ab<br>(ii,iv,v);<br>C1+2a(i,i<br>i); D | Rankou, H.                                                                                           | Fay, M.                         |
| 4332<br>4225      | ORCHIDAC<br>EAE | <i>Phragmipe<br/>dium<br/>caudatum</i>          | (Lindl.)<br>Rolfe                                      | 2016               | 8/09/15             | EN       | A2cd+3c<br>d+4cd;<br>B2ab(ii,ii<br>i,v)                                    | Rankou, H.                                                                                           | Fay, M.                         |
| 4332<br>4365      | ORCHIDAC<br>EAE | <i>Phragmipe<br/>dium<br/>extaminod<br/>ium</i> | Castav±o,<br>Hv°gsater<br>&<br>E.Aguirre               | 2016               | 9/09/15             | CR       | A2cd+3c<br>d+4cd;<br>B1ab(ii,ii<br>i,v);<br>C1+2a(i,i<br>i); D             | Rankou, H.                                                                                           | Fay, M.                         |

| taxo<br>nid       | family          | scientific_<br>name                                 | authority                                  | published_<br>year | assessment_<br>date | category | criteria                                       | assessor                                                       | reviewer                                  |
|-------------------|-----------------|-----------------------------------------------------|--------------------------------------------|--------------------|---------------------|----------|------------------------------------------------|----------------------------------------------------------------|-------------------------------------------|
| 4332<br>4685      | ORCHIDAC<br>EAE | <i>Phragmipe<br/>dium<br/>humboldtii</i>            | (Warsz.)<br>J.T.Atwood<br>&<br>Dressler    | 2016               | 21/09/15            | VU       | B2ab(ii,ii<br>i,v)                             | Rankou, H.                                                     | Fay, M.                                   |
| 4332<br>4857      | ORCHIDAC<br>EAE | <i>Phragmipe<br/>dium<br/>lindenii</i>              | (Lindl.)<br>Dressler &<br>N.H.Willia<br>ms | 2013               | 9/11/09             | LC       | NA                                             | Romand-<br>Monnier, F.<br>&<br>Chadburn,<br>H.                 | Rankou, H.                                |
| 4332<br>5583      | ORCHIDAC<br>EAE | <i>Phragmipe<br/>dium<br/>pearcei</i>               | (Rchb.f.)<br>Rauh<br>&<br>Senghas          | 2016               | 8/09/15             | LC       | NA                                             | Rankou, H.                                                     | Fay, M.                                   |
| 4332<br>6434      | ORCHIDAC<br>EAE | <i>Phragmipe<br/>dium<br/>warszewicz<br/>ianum</i>  | (Rchb.f.)<br>Schltr.                       | 2016               | 10/09/15            | VU       | B2ab(ii,ii<br>i,v)                             | Rankou, H.                                                     | Fay, M.                                   |
| 4439<br>2237      | ORCHIDAC<br>EAE | <i>Platystele<br/>minimiflora</i>                   | (Schltr.)<br>Garay                         | 2013               | 4/06/10             | LC       | NA                                             | Chadburn,<br>H. &<br>Groom, A.                                 | Rankou, H.                                |
| 1381<br>9272<br>1 | ORCHIDAC<br>EAE | <i>Pleurothall<br/>is killipii</i>                  | Garay                                      | 2022               | 9/02/19             | VU       | B1ab(iii)<br>+2ab(iii)                         | Vieira-<br>Uribe, S. &<br>Castro, C.                           | Garcv#a,<br>N. &<br>Rankou, H.            |
| 2248<br>6542      | ORCHIDAC<br>EAE | <i>Pleurothall<br/>is<br/>miniatoline<br/>olata</i> | Hoehne                                     | 2014               | 1/07/14             | DD       | NA                                             | Lutz, M.,<br>Chadburn,<br>H. &<br>Romand-<br>Monnier, F.       | Toscano de<br>Brito,<br>A.L.V.            |
| 1381<br>9272<br>5 | ORCHIDAC<br>EAE | <i>Pleurothall<br/>is mundula</i>                   | Luer<br>&<br>R.Escobar                     | 2022               | 9/02/19             | EN       | B1ab(iii)<br>+2ab(iii)                         | Vieira-<br>Uribe, S. &<br>Castro, C.                           | Garcv#a,<br>N. &<br>Rankou, H.            |
| 4439<br>3559      | ORCHIDAC<br>EAE | <i>Pleurothall<br/>is rowleei</i>                   | Ames                                       | 2013               | 12/10/09            | LC       | NA                                             | Romand-<br>Monnier, F.                                         | Rankou, H.                                |
| 2248<br>6547      | ORCHIDAC<br>EAE | <i>Pleurothall<br/>is<br/>talpinarioi<br/>des</i>   | Garay &<br>Dunst.                          | 2018               | 12/07/16            | DD       | NA                                             | Canteiro,<br>C.                                                | Rankou, H.                                |
| 1793<br>21        | ORCHIDAC<br>EAE | <i>Polystachy<br/>a caudata</i>                     | Summerh.                                   | 2013               | 25/03/13            | EN       | B1ab(i,ii,<br>iii,iv)+2a<br>b(i,ii,iii,i<br>v) | IUCN SSC<br>East<br>African<br>Plants Red<br>List<br>Authority | Hilton-<br>Taylor, C.<br>& Scott,<br>J.A. |
| 2248<br>6161      | ORCHIDAC<br>EAE | <i>Porrogloss<br/>um<br/>muscosum</i>               | (Rchb.f.)<br>Schltr.                       | 2017               | 15/06/16            | LC       | NA                                             | Canteiro,<br>C.                                                | Ducette, A.                               |
| 1246<br>3547<br>7 | ORCHIDAC<br>EAE | <i>Psychilis<br/>macconnell<br/>iae</i>             | Sauleda                                    | 2018               | 8/11/16             | NT       | NA                                             | Bv°rrios,<br>S.,<br>Hamilton,<br>M.A. &<br>Sanchez,<br>M.      | Clubbe,<br>C.P. &<br>Rankou, H.           |
| 2248<br>6490      | ORCHIDAC<br>EAE | <i>Psychilis<br/>olivacea</i>                       | (Cogn.)<br>Sauleda                         | 2014               | 8/01/14             | VU       | B1ab(iii)                                      | Chadburn,<br>H. &<br>Khela, S.                                 | Ackerman,<br>J.D.                         |
| 4439<br>2247      | ORCHIDAC<br>EAE | <i>Restrepia<br/>trichogloss<br/>a</i>              | F.Lehm. ex<br>Sander                       | 2013               | 9/08/09             | LC       | NA                                             | Romand-<br>Monnier, F.                                         | Rankou, H.                                |
| 1182<br>6788<br>7 | ORCHIDAC<br>EAE | <i>Rodriguezi<br/>a<br/>granadensi<br/>s</i>        | Rchb.f.                                    | 2021               | 18/12/20            | LC       | NA                                             | Lopez-<br>Gallego, C.<br>& Morales<br>M, P.A.                  | Goettsch,<br>B.                           |
| 4439<br>2823      | ORCHIDAC<br>EAE | <i>Scaphyglott<br/>is sickii</i>                    | Pabst                                      | 2013               | 9/01/11             | LC       | NA                                             | Romand-<br>Monnier, F.<br>&<br>Chadburn,<br>H.                 | Rankou, H.                                |

| taxo<br>nid       | family          | scientific_<br>name                        | authority                                            | published_<br>year | assessment_<br>date | category | criteria                       | assessor                                                                                | reviewer                              |
|-------------------|-----------------|--------------------------------------------|------------------------------------------------------|--------------------|---------------------|----------|--------------------------------|-----------------------------------------------------------------------------------------|---------------------------------------|
| 1954<br>7002<br>2 | ORCHIDAC<br>EAE | <i>Sievekingia<br/>filifera</i>            | Dressler                                             | 2022               | 22/11/19            | EN       | B1ab(iii,<br>v)+2ab(ii<br>i,v) | Castro, C.,<br>Moreno, S.,<br>Vieira-<br>Uribe, S.,<br>Ospina, N.<br>& √Ávila-<br>R, L. | Garcv#a,<br>N. &<br>Rankou, H.        |
| 4439<br>3194      | ORCHIDAC<br>EAE | <i>Specklinia<br/>brighamii</i>            | (S.Watson)<br>Pridgeon &<br>M.W.Chas<br>e            | 2013               | 27/05/09            | LC       | NA                             | Contu, S.                                                                               | Rankou, H.                            |
| 2248<br>6322      | ORCHIDAC<br>EAE | <i>Specklinia<br/>cabellensis</i>          | (Rchb.f.)<br>Pridgeon &<br>M.W.Chas<br>e             | 2018               | 13/10/16            | NT       | NA                             | Canteiro,<br>C.                                                                         | Rankou, H.                            |
| 4439<br>3176      | ORCHIDAC<br>EAE | <i>Specklinia<br/>corniculata</i>          | (Sw.)<br>Steud.                                      | 2013               | 24/06/09            | LC       | NA                             | Romand-<br>Monnier, F.                                                                  | Rankou, H.                            |
| 4439<br>3086      | ORCHIDAC<br>EAE | <i>Specklinia<br/>picta</i>                | (Lindl.)<br>Pridgeon &<br>M.W.Chas<br>e              | 2013               | 8/06/09             | LC       | NA                             | Romand-<br>Monnier, F.                                                                  | Rankou, H.                            |
| 4439<br>3017      | ORCHIDAC<br>EAE | <i>Stelis<br/>immersa</i>                  | (Linden &<br>Rchb.f.)<br>Pridgeon &<br>M.W.Chas<br>e | 2013               | 14/01/10            | LC       | NA                             | Romand-<br>Monnier, F.                                                                  | Rankou, H.                            |
| 4439<br>2947      | ORCHIDAC<br>EAE | <i>Stelis<br/>itatiayae</i>                | Schltr.                                              | 2013               | 9/01/10             | NT       | NA                             | Romand-<br>Monnier, F.<br>&<br>Chadburn,<br>H.                                          | Rankou, H.                            |
| 4439<br>2940      | ORCHIDAC<br>EAE | <i>Stelis<br/>magdalena<br/>e</i>          | (Rchb.f.)<br>Pridgeon &<br>M.W.Chas<br>e             | 2013               | 18/02/10            | LC       | NA                             | Brummitt,<br>N.                                                                         | Rankou, H.                            |
| 4439<br>3441      | ORCHIDAC<br>EAE | <i>Stelis<br/>ruprechtian<br/>a</i>        | Rchb.f.                                              | 2013               | 8/04/09             | LC       | NA                             | Romand-<br>Monnier, F.<br>&<br>Chadburn,<br>H.                                          | Rankou, H.                            |
| 2248<br>6291      | ORCHIDAC<br>EAE | <i>Stelis<br/>tenuilabris</i>              | Lindl.                                               | 2014               | 16/10/13            | LC       | NA                             | Khela, S. &<br>Chadburn,<br>H.                                                          | Endara, L.<br>&<br>Karremans,<br>A.P. |
| 4439<br>2465      | ORCHIDAC<br>EAE | <i>Telipogon<br/>alexii</i>                | N.H.Willia<br>ms &<br>Dressler                       | 2013               | 8/12/08             | VU       | B1ab(iii)                      | Dyson,<br>P.L.                                                                          | Rankou, H.                            |
| 2248<br>6299      | ORCHIDAC<br>EAE | <i>Telipogon<br/>biolleyi</i>              | Schltr.                                              | 2014               | 16/12/09            | NT       | NA                             | Chadburn,<br>H. &<br>Romand-<br>Monnier, F.                                             | Bogar√zn,<br>D.                       |
| 1584<br>5913<br>6 | ORCHIDAC<br>EAE | <i>Tolumnia<br/>lucayana</i>               | (Nash)<br>Braem                                      | 2020               | 19/09/19            | EN       | B2ab(ii,ii<br>i,v)             | Oviedo, R.,<br>Freid, E.H.,<br>Hechavarr<br>a, J.,<br>Becquer, E.<br>& Morales,<br>A.   | Rodrv#gue<br>z Cala, D.               |
| 6210<br>0347      | ORCHIDAC<br>EAE | <i>Tolumnia<br/>variegata</i>              | (Sw.)<br>Braem                                       | 2014               | 17/07/14            | LC       | NA                             | Roberts, A.                                                                             | Rankou, H.                            |
| 4439<br>2425      | ORCHIDAC<br>EAE | <i>Trichopilia<br/>marginata</i>           | Henfr.                                               | 2013               | 15/12/09            | LC       | NA                             | Romand-<br>Monnier, F.                                                                  | Rankou, H.                            |
| 4439<br>2461      | ORCHIDAC<br>EAE | <i>Trichopilia<br/>turialbae</i>           | Rchb.f.                                              | 2013               | 15/12/09            | LC       | NA                             | Romand-<br>Monnier, F.                                                                  | Rankou, H.                            |
| 2248<br>6525      | ORCHIDAC<br>EAE | <i>Trichosalpi<br/>nx<br/>silverstonei</i> | Luer                                                 | 2018               | 4/10/16             | DD       | NA                             | Canteiro,<br>C.                                                                         | Rankou, H.                            |

| taxo<br>nid  | family          | scientific_<br>name                      | authority                    | published_<br>year | assessment<br>_date | category | criteria  | assessor                                       | reviewer                                                                                                                      |
|--------------|-----------------|------------------------------------------|------------------------------|--------------------|---------------------|----------|-----------|------------------------------------------------|-------------------------------------------------------------------------------------------------------------------------------|
| 2248<br>6461 | ORCHIDAC<br>EAE | <i>Vanda<br/>tessellata</i>              | (Roxb.)<br>Hook. ex<br>G.Don | 2014               | 16/10/13            | LC       | NA        | Khela, S. &<br>Chadburn,<br>H.                 | Gunasekara<br>, S., Huda,<br>M.K., Pant,<br>B. &<br>Kumar,<br>C.S.                                                            |
| 2248<br>6340 | ORCHIDAC<br>EAE | <i>Warczewic<br/>zella<br/>ionoleuca</i> | (Rech.f.)<br>Schltr.         | 2018               | 21/10/16            | LC       | NA        | Canteiro,<br>C.                                | Rankou, H.                                                                                                                    |
| 4439<br>2535 | ORCHIDAC<br>EAE | <i>Zygopetalu<br/>m crinitum</i>         | Lodd.                        | 2013               | 8/03/09             | LC       | NA        | Romand-<br>Monnier, F.<br>&<br>Chadburn,<br>H. | Rankou, H.                                                                                                                    |
| 4576<br>5    | PIPERACEA<br>E  | <i>Peperomia<br/>abnormis</i>            | Trel.                        | 2004               | 38107               | NT       | NA        | Santiana, J.<br>& Pitman,<br>N.                | Valencia,<br>R., Pitman,<br>N., Leon-<br>Yanez, S.<br>&<br>Jorgensen,<br>P.M.<br>(Ecuador<br>Plants Red<br>List<br>Authority) |
| 4576<br>8    | PIPERACEA<br>E  | <i>Peperomia<br/>arenillasen<br/>sis</i> | Yunck.                       | 2004               | 38107               | EN       | B1ab(iii) | Santiana, J.<br>& Pitman,<br>N.                | Valencia,<br>R., Pitman,<br>N., Leon-<br>Yanez, S.<br>&<br>Jorgensen,<br>P.M.<br>(Ecuador<br>Plants Red<br>List<br>Authority) |
| 4577<br>0    | PIPERACEA<br>E  | <i>Peperomia<br/>choritana</i>           | Trel.                        | 2004               | 38107               | VU       | D2        | Santiana, J.<br>& Pitman,<br>N.                | Valencia,<br>R., Pitman,<br>N., Leon-<br>Yanez, S.<br>&<br>Jorgensen,<br>P.M.<br>(Ecuador<br>Plants Red<br>List<br>Authority) |
| 4577<br>4    | PIPERACEA<br>E  | <i>Peperomia<br/>dauleana</i>            | C. DC.                       | 2004               | 38107               | CR       | B1ab(iii) | Santiana, J.<br>& Pitman,<br>N.                | Valencia,<br>R., Pitman,<br>N., Leon-<br>Yanez, S.<br>&<br>Jorgensen,<br>P.M.<br>(Ecuador<br>Plants Red<br>List<br>Authority) |
| 4577<br>5    | PIPERACEA<br>E  | <i>Peperomia<br/>discifolia</i>          | Sodiuro                      | 2004               | 38107               | DD       | NA        | Santiana, J.<br>& Pitman,<br>N.                | Valencia,<br>R., Pitman,<br>N., Leon-<br>Yanez, S.<br>&<br>Jorgensen,<br>P.M.<br>(Ecuador<br>Plants Red<br>List<br>Authority) |

| taxo<br>nid       | family         | scientific_<br>name                      | authority | published_<br>year | assessment<br>_date | category | criteria               | assessor                        | reviewer                                                                                                                      |
|-------------------|----------------|------------------------------------------|-----------|--------------------|---------------------|----------|------------------------|---------------------------------|-------------------------------------------------------------------------------------------------------------------------------|
| 4577<br>6         | PIPERACEA<br>E | <i>Peperomia<br/>disjunctiflo<br/>ra</i> | Yunck.    | 2004               | 38107               | EN       | B1ab(iii)              | Santiana, J.<br>& Pitman,<br>N. | Valencia,<br>R., Pitman,<br>N., Leon-<br>Yanez, S.<br>&<br>Jorgensen,<br>P.M.<br>(Ecuador<br>Plants Red<br>List<br>Authority) |
| 1100<br>7881<br>1 | PIPERACEA<br>E | <i>Peperomia<br/>dusenii</i>             | C.DC.     | 2020               | 43987               | CR       | B1ab(iii)<br>+2ab(iii) | Cheek, M.<br>& Lovell,<br>R.    | Onana, J.-<br>M.                                                                                                              |
| 4577<br>9         | PIPERACEA<br>E | <i>Peperomia<br/>glandulosa</i>          | C.DC.     | 2004               | 38107               | CR       | B1ab(iii)              | Santiana, J.<br>& Pitman,<br>N. | Valencia,<br>R., Pitman,<br>N., Leon-<br>Yanez, S.<br>&<br>Jorgensen,<br>P.M.<br>(Ecuador<br>Plants Red<br>List<br>Authority) |
| 4578<br>2         | PIPERACEA<br>E | <i>Peperomia<br/>guttulata</i>           | Sodiro    | 2004               | 38107               | NT       | NA                     | Santiana, J.<br>& Pitman,<br>N. | Valencia,<br>R., Pitman,<br>N., Leon-<br>Yanez, S.<br>&<br>Jorgensen,<br>P.M.<br>(Ecuador<br>Plants Red<br>List<br>Authority) |
| 4578<br>6         | PIPERACEA<br>E | <i>Peperomia<br/>leucanther<br/>a</i>    | C. DC.    | 2004               | 38107               | EN       | B1ab(iii)              | Santiana, J.<br>& Pitman,<br>N. | Valencia,<br>R., Pitman,<br>N., Leon-<br>Yanez, S.<br>&<br>Jorgensen,<br>P.M.<br>(Ecuador<br>Plants Red<br>List<br>Authority) |
| 4579<br>0         | PIPERACEA<br>E | <i>Peperomia<br/>millei</i>              | Sodiro    | 2004               | 38107               | VU       | B1ab(iii)              | Santiana, J.<br>& Pitman,<br>N. | Valencia,<br>R., Pitman,<br>N., Leon-<br>Yanez, S.<br>&<br>Jorgensen,<br>P.M.<br>(Ecuador<br>Plants Red<br>List<br>Authority) |
| 4579<br>4         | PIPERACEA<br>E | <i>Peperomia<br/>parvilimba</i>          | C. DC.    | 2004               | 38107               | CR       | B1ab(iii)              | Santiana, J.<br>& Pitman,<br>N. | Valencia,<br>R., Pitman,<br>N., Leon-<br>Yanez, S.<br>&<br>Jorgensen,<br>P.M.<br>(Ecuador<br>Plants Red<br>List<br>Authority) |

| taxo<br>nid  | family         | scientific_<br>name                            | authority            | published_<br>year | assessment<br>_date | category | criteria  | assessor                        | reviewer                                                                                                                      |
|--------------|----------------|------------------------------------------------|----------------------|--------------------|---------------------|----------|-----------|---------------------------------|-------------------------------------------------------------------------------------------------------------------------------|
| 4579<br>5    | PIPERACEA<br>E | <i>Peperomia<br/>peploides</i>                 | Kunth                | 2004               | 38107               | CR       | B1ab(iii) | Santiana, J.<br>& Pitman,<br>N. | Valencia,<br>R., Pitman,<br>N., Leon-<br>Yanez, S.<br>&<br>Jorgensen,<br>P.M.<br>(Ecuador<br>Plants Red<br>List<br>Authority) |
| 6391<br>1246 | PIPERACEA<br>E | <i>Peperomia<br/>petiolata</i>                 | Hook.f.              | 2014               | 38717               | LC       | NA        | Tye, A. &<br>Callebaut,<br>J.   | Hilton-<br>Taylor, C.<br>& Sayer, C.                                                                                          |
| 4579<br>9    | PIPERACEA<br>E | <i>Peperomia<br/>pichinchae</i>                | C. DC.               | 2004               | 38107               | CR       | B1ab(iii) | Santiana, J.<br>& Pitman,<br>N. | Valencia,<br>R., Pitman,<br>N., Leon-<br>Yanez, S.<br>&<br>Jorgensen,<br>P.M.<br>(Ecuador<br>Plants Red<br>List<br>Authority) |
| 4580<br>0    | PIPERACEA<br>E | <i>Peperomia<br/>porphyride<br/>a</i>          | Diels                | 2004               | 38107               | VU       | D2        | Santiana, J.<br>& Pitman,<br>N. | Valencia,<br>R., Pitman,<br>N., Leon-<br>Yanez, S.<br>&<br>Jorgensen,<br>P.M.<br>(Ecuador<br>Plants Red<br>List<br>Authority) |
| 6898<br>2291 | PIPERACEA<br>E | <i>Peperomia<br/>pseudopere<br/>skiiifolia</i> | C.DC.                | 2015               | 41977               | LC       | NA        | Roberts, A.                     | Clubbe,<br>C.P.                                                                                                               |
| 4580<br>1    | PIPERACEA<br>E | <i>Peperomia<br/>pululaguan<br/>a</i>          | C. DC.               | 2004               | 38107               | CR       | B1ab(iii) | Santiana, J.<br>& Pitman,<br>N. | Valencia,<br>R., Pitman,<br>N., Leon-<br>Yanez, S.<br>&<br>Jorgensen,<br>P.M.<br>(Ecuador<br>Plants Red<br>List<br>Authority) |
| 4580<br>2    | PIPERACEA<br>E | <i>Peperomia<br/>rubropunct<br/>ulata</i>      | C. DC.               | 2004               | 38107               | EN       | B1ab(iii) | Santiana, J.<br>& Pitman,<br>N. | Valencia,<br>R., Pitman,<br>N., Leon-<br>Yanez, S.<br>&<br>Jorgensen,<br>P.M.<br>(Ecuador<br>Plants Red<br>List<br>Authority) |
| 4581<br>1    | PIPERACEA<br>E | <i>Peperomia<br/>udimontan<br/>a</i>           | Trel.<br>&<br>Yunck. | 2004               | 38107               | EN       | B1ab(iii) | Santiana, J.<br>& Pitman,<br>N. | Valencia,<br>R., Pitman,<br>N., Leon-<br>Yanez, S.<br>&<br>Jorgensen,<br>P.M.<br>(Ecuador                                     |

| taxo<br>nid | family            | scientific_<br>name                       | authority                           | published_<br>year | assessment<br>_date | category | criteria  | assessor                         | reviewer                                                                                                                                                                                      |
|-------------|-------------------|-------------------------------------------|-------------------------------------|--------------------|---------------------|----------|-----------|----------------------------------|-----------------------------------------------------------------------------------------------------------------------------------------------------------------------------------------------|
|             |                   |                                           |                                     |                    |                     |          |           |                                  | Plants Red List Authority)                                                                                                                                                                    |
| 4371<br>5   | POLYPODI<br>ACEAE | <i>Campylone<br/>urum<br/>oellgaardii</i> | B.Levén                             | 2003               | 30/04/03            | VU       | D2        | Navarrete,<br>H. &<br>Pitman, N. | Valencia,<br>R., Pitman,<br>N., Yáñez, S.,<br>Jurgensen,<br>P.M.<br>(Ecuador<br>Plants Red<br>List<br>Authority)<br>& Jermy,<br>C., Ranker,<br>T.<br>(Pteridophy<br>te Red List<br>Authority) |
| 4371<br>6   | POLYPODI<br>ACEAE | <i>Ceradenia<br/>melanopus</i>            | (Grev.<br>&<br>Hook.)<br>L.E.Bishop | 2003               | 30/04/03            | VU       | B1ab(iii) | Navarrete,<br>H. &<br>Pitman, N. | Valencia,<br>R., Pitman,<br>N., Yáñez, S.,<br>Jurgensen,<br>P.M.<br>(Ecuador<br>Plants Red<br>List<br>Authority)<br>& Jermy,<br>C., Ranker,<br>T.<br>(Pteridophy<br>te Red List<br>Authority) |
| 4371<br>7   | POLYPODI<br>ACEAE | <i>Ceradenia<br/>semiadnata</i>           | (Hook.)<br>L.E.Bishop               | 2003               | 30/04/03            | VU       | D2        | Navarrete,<br>H. &<br>Pitman, N. | Valencia,<br>R., Pitman,<br>N., Yáñez, S.,<br>Jurgensen,<br>P.M.<br>(Ecuador<br>Plants Red<br>List<br>Authority)<br>& Jermy,<br>C., Ranker,<br>T.<br>(Pteridophy<br>te Red List<br>Authority) |
| 4372<br>2   | POLYPODI<br>ACEAE | <i>Pecluma<br/>pastazensis</i>            | (Hieron.)<br>R.C.Moran              | 2003               | 30/04/03            | NT       | NA        | Navarrete,<br>H. &<br>Pitman, N. | Valencia,<br>R., Pitman,<br>N., Yáñez, S.,<br>Jurgensen,<br>P.M.<br>(Ecuador<br>Plants Red<br>List<br>Authority)<br>& Jermy,<br>C., Ranker,<br>T.<br>(Pteridophy<br>te Red List<br>Authority) |
