# Supplementary material for: Conservation status of vascular epiphytes in the Neotropics
Source: Research Square preprint supplement (doi:10.21203/rs.3.rs-2773328/v1), 2023-04-05
Supplement: Supplementary file 2 [file e39bcecf8eff7b62bb7806e0.xlsx]

## Sheet: Sheet1
family	genus	taxa	EOO	AOO	Nbe_unique_occ.	Nbe_subPop	Nbe_loc	Nbe_loc_PA	Category_CriteriaB	Category_code	Ratio_occ_within_PA	Category_AOO	Category_EOO
Bromeliaceae	Aechmea	Aechmea abbreviata	154872	60	31	12	13	3	LC or NT	LC or NT B1a+B2a	32.3	LC or NT	LC or NT
Bromeliaceae	Aechmea	Aechmea aculeatosepala	117447	56	33	6	11	1	LC or NT	LC or NT B1a+B2a	6.1	LC or NT	LC or NT
Bromeliaceae	Aechmea	Aechmea aenigmatica	NA	4	1	1	1	0	CR	CR B2a	0	CR	NA
Bromeliaceae	Aechmea	Aechmea aguadocensis	NA	4	2	1	1	0	CR	CR B2a	0	CR	NA
Bromeliaceae	Aechmea	Aechmea aiuruocensis	2569.3	32	10	3	7	1	VU	VU B1a+B2a	30	VU	VU
Bromeliaceae	Aechmea	Aechmea alba	1188886	208	75	31	41	12	LC or NT	LC or NT B1a+B2a	40	LC or NT	LC or NT
Bromeliaceae	Aechmea	Aechmea alegrensis	NA	4	1	1	1	0	CR	CR B2a	0	CR	NA
Bromeliaceae	Aechmea	Aechmea alopecurus	734683	36	14	7	9	2	VU	VU B2a	14.3	VU	LC or NT
Bromeliaceae	Aechmea	Aechmea altocaririensis	15797.8	20	6	3	5	3	EN	EN B2a	66.7	EN	VU
Bromeliaceae	Aechmea	Aechmea amicorum	NA	8	2	2	2	1	EN	EN B2a	50	EN	NA
Bromeliaceae	Aechmea	Aechmea amorimii	7656.1	68	21	6	10	6	VU	VU B1a+B2a	71.4	VU	VU
Bromeliaceae	Aechmea	Aechmea ampla	9356.6	28	8	7	7	1	VU	VU B1a+B2a	12.5	VU	VU
Bromeliaceae	Aechmea	Aechmea andersoniana	965.3	12	5	3	3	3	LC or NT	EN B1a+B2a	100	EN	EN
Bromeliaceae	Aechmea	Aechmea andersonii	773	12	7	3	2	2	LC or NT	EN B1a+B2a	100	EN	EN
Bromeliaceae	Aechmea	Aechmea angustifolia	1.16894e+07	1344	500	201	247	70	LC or NT	LC or NT B1a+B2a	40.6	LC or NT	LC or NT
Bromeliaceae	Aechmea	Aechmea anomala	NA	4	2	1	1	0	CR	CR B2a	0	CR	NA
Bromeliaceae	Aechmea	Aechmea apocalyptica	29399.2	24	7	6	6	2	VU	VU B2a	42.9	VU	LC or NT
Bromeliaceae	Aechmea	Aechmea aquilega	1.31334e+07	1524	667	158	294	50	LC or NT	LC or NT B1a+B2a	24.4	LC or NT	LC or NT
Bromeliaceae	Aechmea	Aechmea araneosa	73844.3	104	51	7	17	3	LC or NT	LC or NT B1a+B2a	5.9	LC or NT	LC or NT
Bromeliaceae	Aechmea	Aechmea arenaria	190875	20	8	3	5	0	EN	EN B2a	0	EN	LC or NT
Bromeliaceae	Aechmea	Aechmea aripoensis	NA	8	2	2	2	1	EN	EN B2a	50	EN	NA
Bromeliaceae	Aechmea	Aechmea atrovittata	NA	4	2	1	1	0	CR	CR B2a	0	CR	NA
Bromeliaceae	Aechmea	Aechmea avaldoana	NA	4	1	1	1	0	CR	CR B2a	0	CR	NA
Bromeliaceae	Aechmea	Aechmea azurea	34617.6	52	17	8	12	4	LC or NT	LC or NT B1a+B2a	23.5	LC or NT	LC or NT
Bromeliaceae	Aechmea	Aechmea bahiana	29355.7	16	4	4	4	1	EN	EN B2a	25	EN	LC or NT
Bromeliaceae	Aechmea	Aechmea bambusoides	84707.2	80	22	15	19	0	LC or NT	LC or NT B1a+B2a	0	LC or NT	LC or NT
Bromeliaceae	Aechmea	Aechmea baudoensis	NA	4	1	1	1	0	CR	CR B2a	0	CR	NA
Bromeliaceae	Aechmea	Aechmea bicolor	40140	140	46	17	26	7	LC or NT	LC or NT B1a+B2a	41.3	LC or NT	LC or NT
Bromeliaceae	Aechmea	Aechmea biflora	27467.9	24	12	5	6	0	VU	VU B2a	0	VU	LC or NT
Bromeliaceae	Aechmea	Aechmea blanchetiana	1.76834e+06	352	129	40	66	19	LC or NT	LC or NT B1a+B2a	44.2	LC or NT	LC or NT
Bromeliaceae	Aechmea	Aechmea blumenavii	83838.4	300	127	18	50	6	LC or NT	LC or NT B1a+B2a	32.3	LC or NT	LC or NT
Bromeliaceae	Aechmea	Aechmea bocainensis	11659.6	32	9	6	7	6	VU	VU B1a+B2a	77.8	VU	VU
Bromeliaceae	Aechmea	Aechmea brachyclada	6.06583e+06	312	109	27	44	14	LC or NT	LC or NT B1a+B2a	47.7	LC or NT	LC or NT
Bromeliaceae	Aechmea	Aechmea brachystachys	NA	8	2	2	2	1	EN	EN B2a	50	EN	NA
Bromeliaceae	Aechmea	Aechmea bracteata	11168511	1924	657	183	329	65	LC or NT	LC or NT B1a+B2a	31.7	LC or NT	LC or NT
Bromeliaceae	Aechmea	Aechmea brassicoides	290.6	24	14	2	2	1	EN	EN B1a+B2a	92.9	EN	EN
Bromeliaceae	Aechmea	Aechmea brevicollis	1.07678e+06	252	109	35	38	8	LC or NT	LC or NT B1a+B2a	33.9	LC or NT	LC or NT
Bromeliaceae	Aechmea	Aechmea bromeliifolia	1.59202e+07	2484	884	365	467	121	LC or NT	LC or NT B1a+B2a	38	LC or NT	LC or NT
Bromeliaceae	Aechmea	Aechmea burle-marxii	132666	80	22	11	16	8	LC or NT	LC or NT B1a+B2a	63.6	LC or NT	LC or NT
Bromeliaceae	Aechmea	Aechmea caesia	4758.7	40	14	4	8	2	VU	VU B1a+B2a	42.9	VU	VU
Bromeliaceae	Aechmea	Aechmea calyculata	1.80394e+06	528	205	45	106	14	LC or NT	LC or NT B1a+B2a	20	LC or NT	LC or NT
Bromeliaceae	Aechmea	Aechmea campanulata	12	12	8	1	1	0	CR	CR B1a+B2a	0	CR	CR
Bromeliaceae	Aechmea	Aechmea canaliculata	277110	32	12	6	7	3	VU	VU B2a	66.7	VU	LC or NT
Bromeliaceae	Aechmea	Aechmea candida	1.46601e+06	32	13	6	7	3	VU	VU B2a	69.2	VU	LC or NT
Bromeliaceae	Aechmea	Aechmea cariocae	36406.5	20	7	4	4	3	EN	EN B2a	85.7	EN	LC or NT
Bromeliaceae	Aechmea	Aechmea carvalhoi	22831.4	28	10	5	7	3	VU	VU B2a	40	VU	LC or NT
Bromeliaceae	Aechmea	Aechmea castanea	17055.8	96	40	7	17	2	LC or NT	LC or NT B1a+B2a	7.5	LC or NT	LC or NT
Bromeliaceae	Aechmea	Aechmea castelnavii	6.41912e+06	244	89	45	50	14	LC or NT	LC or NT B1a+B2a	39.3	LC or NT	LC or NT
Bromeliaceae	Aechmea	Aechmea catendensis	771.3	16	6	3	4	0	EN	EN B1a+B2a	0	EN	EN
Bromeliaceae	Aechmea	Aechmea cathcartii	NA	4	2	1	1	1	LC or NT	LC or NT B2a	100	CR	NA
Bromeliaceae	Aechmea	Aechmea caudata	1.34e+06	584	223	43	102	24	LC or NT	LC or NT B1a+B2a	33.2	LC or NT	LC or NT
Bromeliaceae	Aechmea	Aechmea cephaloides	2691	28	15	4	4	1	EN	EN B1a+B2a	20	EN	EN
Bromeliaceae	Aechmea	Aechmea chantinii	7.82293e+06	544	207	70	85	25	LC or NT	LC or NT B1a+B2a	44.9	LC or NT	LC or NT
Bromeliaceae	Aechmea	Aechmea coelestis	8.19501e+06	752	251	75	126	33	LC or NT	LC or NT B1a+B2a	41.8	LC or NT	LC or NT
Bromeliaceae	Aechmea	Aechmea colombiana	276696	60	24	10	13	2	LC or NT	LC or NT B1a+B2a	8.3	LC or NT	LC or NT
Bromeliaceae	Aechmea	Aechmea comata	1.04684e+06	148	56	16	31	6	LC or NT	LC or NT B1a+B2a	17.9	LC or NT	LC or NT
Bromeliaceae	Aechmea	Aechmea conferta	6.06583e+06	308	108	26	43	14	LC or NT	LC or NT B1a+B2a	48.1	LC or NT	LC or NT
Bromeliaceae	Aechmea	Aechmea confertiflora	NA	4	1	1	1	1	LC or NT	LC or NT B2a	100	CR	NA
Bromeliaceae	Aechmea	Aechmea confusa	NA	4	1	1	1	0	CR	CR B2a	0	CR	NA
Bromeliaceae	Aechmea	Aechmea conifera	131856	112	43	10	15	7	LC or NT	LC or NT B1a+B2a	72.1	LC or NT	LC or NT
Bromeliaceae	Aechmea	Aechmea contracta	4880461	396	154	55	72	13	LC or NT	LC or NT B1a+B2a	18.2	LC or NT	LC or NT
Bromeliaceae	Aechmea	Aechmea correia-araujoi	7.71836e+06	332	114	31	49	14	LC or NT	LC or NT B1a+B2a	45.6	LC or NT	LC or NT
Bromeliaceae	Aechmea	Aechmea corymbosa	5.03326e+06	556	219	72	87	21	LC or NT	LC or NT B1a+B2a	32.4	LC or NT	LC or NT
Bromeliaceae	Aechmea	Aechmea costantinii	342256	164	58	22	32	5	LC or NT	LC or NT B1a+B2a	13.8	LC or NT	LC or NT
Bromeliaceae	Aechmea	Aechmea cucullata	9794.6	28	18	6	6	1	VU	VU B1a+B2a	16.7	VU	VU
Bromeliaceae	Aechmea	Aechmea curranii	78106.3	60	15	13	13	5	LC or NT	LC or NT B1a+B2a	46.7	LC or NT	LC or NT
Bromeliaceae	Aechmea	Aechmea cylindrata	7208819	716	239	68	116	24	LC or NT	LC or NT B1a+B2a	41.4	LC or NT	LC or NT
Bromeliaceae	Aechmea	Aechmea cymosopaniculata	NA	4	1	1	1	1	LC or NT	LC or NT B2a	100	CR	NA
Bromeliaceae	Aechmea	Aechmea dactylina	317528	468	139	49	80	19	LC or NT	LC or NT B1a+B2a	38.1	LC or NT	LC or NT
Bromeliaceae	Aechmea	Aechmea dealbata	69160.3	24	7	6	6	0	VU	VU B2a	0	VU	LC or NT
Bromeliaceae	Aechmea	Aechmea decurva	NA	4	1	1	1	0	CR	CR B2a	0	CR	NA
Bromeliaceae	Aechmea	Aechmea depressa	71375.1	52	18	11	13	3	LC or NT	LC or NT B1a+B2a	22.2	LC or NT	LC or NT
Bromeliaceae	Aechmea	Aechmea dichlamydea	NA	8	2	2	2	2	LC or NT	LC or NT B2a	100	EN	NA
Bromeliaceae	Aechmea	Aechmea digitata	16185.9	48	15	7	10	5	VU	VU B1a+B2a	66.7	VU	VU
Bromeliaceae	Aechmea	Aechmea discordiae	9.47797e+06	324	113	30	47	17	LC or NT	LC or NT B1a+B2a	49.6	LC or NT	LC or NT
Bromeliaceae	Aechmea	Aechmea disjuncta	76571.3	100	37	16	19	3	LC or NT	LC or NT B1a+B2a	35.1	LC or NT	LC or NT
Bromeliaceae	Aechmea	Aechmea distichantha	5583789	2244	826	257	418	59	LC or NT	LC or NT B1a+B2a	28.2	LC or NT	LC or NT
Bromeliaceae	Aechmea	Aechmea downsiana	NA	4	1	1	1	0	CR	CR B2a	0	CR	NA
Bromeliaceae	Aechmea	Aechmea echinata	925.1	32	13	3	5	2	EN	EN B1a+B2a	61.5	EN	EN
Bromeliaceae	Aechmea	Aechmea egleriana	2.58171e+06	44	16	9	10	6	VU	VU B2a	56.2	VU	LC or NT
Bromeliaceae	Aechmea	Aechmea emmerichiae	54145.8	20	6	3	3	1	EN	EN B2a	16.7	EN	LC or NT
Bromeliaceae	Aechmea	Aechmea entringeri	NA	4	1	1	1	0	CR	CR B2a	0	CR	NA
Bromeliaceae	Aechmea	Aechmea eurycorymbus	44182.2	44	15	8	10	1	VU	VU B2a	20	VU	LC or NT
Bromeliaceae	Aechmea	Aechmea farinosa	519335	64	19	11	13	6	LC or NT	LC or NT B1a+B2a	57.9	LC or NT	LC or NT
Bromeliaceae	Aechmea	Aechmea fasciata	2.81939e+06	284	95	36	60	17	LC or NT	LC or NT B1a+B2a	42.1	LC or NT	LC or NT
Bromeliaceae	Aechmea	Aechmea fendleri	NA	8	2	2	2	1	EN	EN B2a	50	EN	NA
Bromeliaceae	Aechmea	Aechmea fernandae	1.99282e+06	112	52	25	26	15	LC or NT	LC or NT B1a+B2a	51.9	LC or NT	LC or NT
Bromeliaceae	Aechmea	Aechmea ferruginea	6612.3	28	8	3	6	3	VU	VU B1a+B2a	50	VU	VU
Bromeliaceae	Aechmea	Aechmea filicaulis	NA	8	2	2	2	1	EN	EN B2a	50	EN	NA
Bromeliaceae	Aechmea	Aechmea flavorosea	3015.5	20	7	4	5	0	EN	EN B1a+B2a	0	EN	EN
Bromeliaceae	Aechmea	Aechmea flemingii	NA	4	1	1	1	0	CR	CR B2a	0	CR	NA
Bromeliaceae	Aechmea	Aechmea floribunda	869977	108	32	20	26	5	LC or NT	LC or NT B1a+B2a	18.8	LC or NT	LC or NT
Bromeliaceae	Aechmea	Aechmea fosteriana	1711.5	24	7	4	6	1	VU	VU B1a+B2a	14.3	VU	VU
Bromeliaceae	Aechmea	Aechmea frassyi	243.5	12	3	2	3	0	EN	EN B1a+B2a	0	EN	EN
Bromeliaceae	Aechmea	Aechmea fraudulosa	340521	20	7	5	5	2	EN	EN B2a	57.1	EN	LC or NT
Bromeliaceae	Aechmea	Aechmea froesii	67071.5	156	57	14	22	9	LC or NT	LC or NT B1a+B2a	61.4	LC or NT	LC or NT
Bromeliaceae	Aechmea	Aechmea fuerstenbergii	6.06583e+06	324	113	29	46	16	LC or NT	LC or NT B1a+B2a	47.8	LC or NT	LC or NT
Bromeliaceae	Aechmea	Aechmea fulgens	1.78702e+06	352	124	45	71	13	LC or NT	LC or NT B1a+B2a	29.8	LC or NT	LC or NT
Bromeliaceae	Aechmea	Aechmea gamosepala	1.20713e+06	608	227	38	101	19	LC or NT	LC or NT B1a+B2a	36.1	LC or NT	LC or NT
Bromeliaceae	Aechmea	Aechmea geminiflora	NA	8	2	2	2	0	EN	EN B2a	0	EN	NA
Bromeliaceae	Aechmea	Aechmea gentryi	4	4	3	1	1	0	CR	CR B1a	0	EN	CR
Bromeliaceae	Aechmea	Aechmea glandulosa	423	24	12	2	4	2	EN	EN B1a+B2a	83.3	EN	EN
Bromeliaceae	Aechmea	Aechmea gracilis	614276	232	73	29	44	9	LC or NT	LC or NT B1a+B2a	39.7	LC or NT	LC or NT
Bromeliaceae	Aechmea	Aechmea grazielae	NA	8	2	2	2	0	EN	EN B2a	0	EN	NA
Bromeliaceae	Aechmea	Aechmea guainumbiorum	8	8	3	1	1	0	CR	CR B1a	0	EN	CR
Bromeliaceae	Aechmea	Aechmea guaratingensis	4341.8	20	6	4	5	2	EN	EN B1a+B2a	33.3	EN	EN
Bromeliaceae	Aechmea	Aechmea gurkeniana	6422.1	20	5	3	3	1	EN	EN B2a	60	EN	VU
Bromeliaceae	Aechmea	Aechmea gustavoi	37729.8	48	15	6	9	5	VU	VU B2a	60	VU	LC or NT
Bromeliaceae	Aechmea	Aechmea haltonii	10.9	8	3	2	2	1	EN	EN B1a+B2a	33.3	EN	EN
Bromeliaceae	Aechmea	Aechmea heterosepala	8	8	4	2	2	1	EN	EN B1a+B2a	50	EN	EN
Bromeliaceae	Aechmea	Aechmea hoppii	6.14967e+06	568	238	59	90	21	LC or NT	LC or NT B1a+B2a	39.5	LC or NT	LC or NT
Bromeliaceae	Aechmea	Aechmea huebneri	1.29067e+06	68	35	12	13	5	LC or NT	LC or NT B1a+B2a	48.6	LC or NT	LC or NT
Bromeliaceae	Aechmea	Aechmea iguana	NA	4	1	1	1	0	CR	CR B2a	0	CR	NA
Bromeliaceae	Aechmea	Aechmea incompta	11796.4	12	5	3	3	0	EN	EN B2a	0	EN	VU
Bromeliaceae	Aechmea	Aechmea joannis	1670	16	4	3	3	0	EN	EN B1a+B2a	0	EN	EN
Bromeliaceae	Aechmea	Aechmea jungurudoensis	NA	4	1	1	1	1	LC or NT	LC or NT B2a	100	CR	NA
Bromeliaceae	Aechmea	Aechmea kautskyana	NA	4	1	1	1	0	CR	CR B2a	0	CR	NA
Bromeliaceae	Aechmea	Aechmea kentii	NA	4	1	1	1	0	CR	CR B2a	0	CR	NA
Bromeliaceae	Aechmea	Aechmea kertesziae	205947	196	75	19	36	5	LC or NT	LC or NT B1a+B2a	16	LC or NT	LC or NT
Bromeliaceae	Aechmea	Aechmea kleinii	290714	48	18	8	12	2	LC or NT	LC or NT B1a+B2a	16.7	LC or NT	LC or NT
Bromeliaceae	Aechmea	Aechmea koesteri	NA	4	1	1	1	1	LC or NT	LC or NT B2a	100	CR	NA
Bromeliaceae	Aechmea	Aechmea kuntzeana	110358	20	8	5	5	1	EN	EN B2a	25	EN	LC or NT
Bromeliaceae	Aechmea	Aechmea lactifera	25520.3	24	7	3	5	1	EN	EN B2a	14.3	EN	LC or NT
Bromeliaceae	Aechmea	Aechmea lamarckei	1.03405e+07	972	352	92	173	31	LC or NT	LC or NT B1a+B2a	26.1	LC or NT	LC or NT
Bromeliaceae	Aechmea	Aechmea lanata	NA	4	2	1	1	1	LC or NT	LC or NT B2a	100	CR	NA
Bromeliaceae	Aechmea	Aechmea lanjouwii	37415.2	12	4	3	3	2	EN	EN B2a	75	EN	LC or NT
Bromeliaceae	Aechmea	Aechmea lasseri	NA	4	1	1	1	1	LC or NT	LC or NT B2a	100	CR	NA
Bromeliaceae	Aechmea	Aechmea leonardkentiana	1353.7	32	12	3	5	3	EN	EN B1a+B2a	66.7	EN	EN
Bromeliaceae	Aechmea	Aechmea leppardii	NA	4	1	1	1	0	CR	CR B2a	0	CR	NA
Bromeliaceae	Aechmea	Aechmea leptantha	1.87238e+06	424	193	40	85	11	LC or NT	LC or NT B1a+B2a	21.8	LC or NT	LC or NT
Bromeliaceae	Aechmea	Aechmea leucolepis	105163	36	13	6	7	1	VU	VU B2a	7.7	VU	LC or NT
Bromeliaceae	Aechmea	Aechmea lilacinantha	10745.3	12	3	3	3	1	EN	EN B2a	33.3	EN	VU
Bromeliaceae	Aechmea	Aechmea lingulata	9.95836e+06	1052	408	124	218	38	LC or NT	LC or NT B1a+B2a	19.1	LC or NT	LC or NT
Bromeliaceae	Aechmea	Aechmea lingulatoides	169243	92	29	19	22	2	LC or NT	LC or NT B1a+B2a	6.9	LC or NT	LC or NT
Bromeliaceae	Aechmea	Aechmea linharesiorum	2113.5	12	4	3	3	1	EN	EN B1a+B2a	25	EN	EN
Bromeliaceae	Aechmea	Aechmea longicuspis	6.14327e+06	360	123	37	54	16	LC or NT	LC or NT B1a+B2a	44.7	LC or NT	LC or NT
Bromeliaceae	Aechmea	Aechmea longifolia	5.32079e+06	472	230	87	93	26	LC or NT	LC or NT B1a+B2a	37.8	LC or NT	LC or NT
Bromeliaceae	Aechmea	Aechmea longipedunculata	NA	4	1	1	1	0	CR	CR B2a	0	CR	NA
Bromeliaceae	Aechmea	Aechmea longiramosa	NA	4	1	1	1	0	CR	CR B2a	0	CR	NA
Bromeliaceae	Aechmea	Aechmea lueddemanniana	6.13502e+06	624	220	54	94	27	LC or NT	LC or NT B1a+B2a	40.9	LC or NT	LC or NT
Bromeliaceae	Aechmea	Aechmea lugoi	NA	4	2	1	1	0	CR	CR B2a	0	CR	NA
Bromeliaceae	Aechmea	Aechmea lymanii	13.5	8	3	2	2	1	EN	EN B1a+B2a	66.7	EN	EN
Bromeliaceae	Aechmea	Aechmea maasii	48905.5	220	74	22	47	9	LC or NT	LC or NT B1a+B2a	20.3	LC or NT	LC or NT
Bromeliaceae	Aechmea	Aechmea macrochlamys	5004.9	60	30	4	12	3	LC or NT	LC or NT B1a+B2a	16.7	LC or NT	LC or NT
Bromeliaceae	Aechmea	Aechmea maculata	8104.6	16	4	4	4	1	EN	EN B2a	25	EN	VU
Bromeliaceae	Aechmea	Aechmea magdalenae	3.06806e+06	600	183	79	109	32	LC or NT	LC or NT B1a+B2a	43.2	LC or NT	LC or NT
Bromeliaceae	Aechmea	Aechmea manzanaresiana	1633.9	24	6	4	5	1	EN	EN B1a+B2a	16.7	EN	EN
Bromeliaceae	Aechmea	Aechmea maranguapensis	36.4	16	9	1	2	1	EN	EN B1a+B2a	11.1	EN	EN
Bromeliaceae	Aechmea	Aechmea marauensis	358742	236	101	20	32	11	LC or NT	LC or NT B1a+B2a	57.4	LC or NT	LC or NT
Bromeliaceae	Aechmea	Aechmea marginalis	NA	4	1	1	1	0	CR	CR B2a	0	CR	NA
Bromeliaceae	Aechmea	Aechmea mariae-reginae	27602.5	132	41	19	24	9	LC or NT	LC or NT B1a+B2a	51.2	LC or NT	LC or NT
Bromeliaceae	Aechmea	Aechmea matudae	NA	8	2	2	2	1	EN	EN B2a	50	EN	NA
Bromeliaceae	Aechmea	Aechmea mcvaughii	NA	4	1	1	1	0	CR	CR B2a	0	CR	NA
Bromeliaceae	Aechmea	Aechmea melinonii	1.45106e+06	128	48	25	24	8	LC or NT	LC or NT B1a+B2a	35.4	LC or NT	LC or NT
Bromeliaceae	Aechmea	Aechmea mertensii	1.28016e+07	2480	1052	336	455	102	LC or NT	LC or NT B1a+B2a	33.4	LC or NT	LC or NT
Bromeliaceae	Aechmea	Aechmea mexicana	6.52198e+06	800	278	74	126	27	LC or NT	LC or NT B1a+B2a	28.1	LC or NT	LC or NT
Bromeliaceae	Aechmea	Aechmea miniata	1961209	292	118	25	48	10	LC or NT	LC or NT B1a+B2a	38.1	LC or NT	LC or NT
Bromeliaceae	Aechmea	Aechmea mira	NA	4	1	1	1	0	CR	CR B2a	0	CR	NA
Bromeliaceae	Aechmea	Aechmea mollis	478.3	24	12	2	5	3	EN	EN B1a+B2a	83.3	EN	EN
Bromeliaceae	Aechmea	Aechmea moonenii	NA	4	1	1	1	1	LC or NT	LC or NT B2a	100	CR	NA
Bromeliaceae	Aechmea	Aechmea moorei	36749.8	28	14	5	5	0	EN	EN B2a	0	EN	LC or NT
Bromeliaceae	Aechmea	Aechmea multiflora	1.40038e+06	388	171	52	78	16	LC or NT	LC or NT B1a+B2a	26.3	LC or NT	LC or NT
Bromeliaceae	Aechmea	Aechmea murcae	NA	4	1	1	1	0	CR	CR B2a	0	CR	NA
Bromeliaceae	Aechmea	Aechmea muricata	895073	116	49	12	25	4	LC or NT	LC or NT B1a+B2a	22.4	LC or NT	LC or NT
Bromeliaceae	Aechmea	Aechmea mutica	1521.4	44	21	3	8	1	VU	VU B1a+B2a	4.8	VU	VU
Bromeliaceae	Aechmea	Aechmea nallyi	6829	12	3	3	3	1	EN	EN B2a	33.3	EN	VU
Bromeliaceae	Aechmea	Aechmea napoensis	46537.1	56	26	8	11	1	LC or NT	LC or NT B1a+B2a	7.7	LC or NT	LC or NT
Bromeliaceae	Aechmea	Aechmea nidularioides	554490	228	104	33	44	8	LC or NT	LC or NT B1a+B2a	37.5	LC or NT	LC or NT
Bromeliaceae	Aechmea	Aechmea nigribracteata	NA	4	2	1	1	1	LC or NT	LC or NT B2a	100	CR	NA
Bromeliaceae	Aechmea	Aechmea nivea	182087	136	38	24	30	5	LC or NT	LC or NT B1a+B2a	23.7	LC or NT	LC or NT
Bromeliaceae	Aechmea	Aechmea nudicaulis	1.36912e+07	3128	1122	242	564	127	LC or NT	LC or NT B1a+B2a	32.4	LC or NT	LC or NT
Bromeliaceae	Aechmea	Aechmea organensis	7.20143e+06	660	219	66	105	29	LC or NT	LC or NT B1a+B2a	42.9	LC or NT	LC or NT
Bromeliaceae	Aechmea	Aechmea orlandiana	11631.4	36	13	4	9	1	VU	VU B1a+B2a	7.7	VU	VU
Bromeliaceae	Aechmea	Aechmea ornata	9.60506e+06	780	277	63	127	29	LC or NT	LC or NT B1a+B2a	39.7	LC or NT	LC or NT
Bromeliaceae	Aechmea	Aechmea pabstii	8	8	3	2	2	1	EN	EN B1a+B2a	66.7	EN	EN
Bromeliaceae	Aechmea	Aechmea pallida	NA	4	2	1	1	1	LC or NT	LC or NT B2a	100	CR	NA
Bromeliaceae	Aechmea	Aechmea paniculata	NA	8	2	2	2	0	EN	EN B2a	0	EN	NA
Bromeliaceae	Aechmea	Aechmea paniculigera	2.79992e+06	48	12	10	10	3	VU	VU B2a	33.3	VU	LC or NT
Bromeliaceae	Aechmea	Aechmea paradoxa	19.1	12	4	2	3	1	EN	EN B1a+B2a	25	EN	EN
Bromeliaceae	Aechmea	Aechmea paratiensis	NA	4	2	1	1	1	LC or NT	LC or NT B2a	100	CR	NA
Bromeliaceae	Aechmea	Aechmea patriciae	NA	4	1	1	1	0	CR	CR B2a	0	CR	NA
Bromeliaceae	Aechmea	Aechmea pectinata	628624	320	108	26	59	19	LC or NT	LC or NT B1a+B2a	49.1	LC or NT	LC or NT
Bromeliaceae	Aechmea	Aechmea pedicellata	NA	8	2	1	2	0	EN	EN B2a	0	EN	NA
Bromeliaceae	Aechmea	Aechmea penduliflora	8.62341e+06	1028	426	133	172	40	LC or NT	LC or NT B1a+B2a	39.9	LC or NT	LC or NT
Bromeliaceae	Aechmea	Aechmea pernambucentris	1471.9	12	3	2	2	0	EN	EN B1a+B2a	0	EN	EN
Bromeliaceae	Aechmea	Aechmea pimenti-velosoi	2701.9	16	4	4	4	0	EN	EN B1a+B2a	0	EN	EN
Bromeliaceae	Aechmea	Aechmea pineliana	229504	292	107	33	63	9	LC or NT	LC or NT B1a+B2a	13.1	LC or NT	LC or NT
Bromeliaceae	Aechmea	Aechmea podantha	2167.8	12	7	2	2	1	EN	EN B1a+B2a	57.1	EN	EN
Bromeliaceae	Aechmea	Aechmea poitaei	774669	216	83	35	43	7	LC or NT	LC or NT B1a+B2a	21.7	LC or NT	LC or NT
Bromeliaceae	Aechmea	Aechmea politii	1.03161e+06	108	47	21	19	9	LC or NT	LC or NT B1a+B2a	55.3	LC or NT	LC or NT
Bromeliaceae	Aechmea	Aechmea polyantha	59763.6	16	4	3	3	1	EN	EN B2a	25	EN	LC or NT
Bromeliaceae	Aechmea	Aechmea prancei	NA	4	1	1	1	0	CR	CR B2a	0	CR	NA
Bromeliaceae	Aechmea	Aechmea prava	NA	4	1	1	1	1	LC or NT	LC or NT B2a	100	CR	NA
Bromeliaceae	Aechmea	Aechmea pubescens	708464	1284	376	86	171	50	LC or NT	LC or NT B1a+B2a	56.6	LC or NT	LC or NT
Bromeliaceae	Aechmea	Aechmea purpureorosea	389796	48	14	9	11	3	LC or NT	LC or NT B1a+B2a	21.4	LC or NT	LC or NT
Bromeliaceae	Aechmea	Aechmea pyramidalis	46891.8	56	15	12	14	3	LC or NT	LC or NT B1a+B2a	26.7	LC or NT	LC or NT
Bromeliaceae	Aechmea	Aechmea racinae	49465.7	92	38	5	18	3	LC or NT	LC or NT B1a+B2a	7.9	LC or NT	LC or NT
Bromeliaceae	Aechmea	Aechmea ramosa	1.1744e+07	832	306	78	157	32	LC or NT	LC or NT B1a+B2a	25.8	LC or NT	LC or NT
Bromeliaceae	Aechmea	Aechmea ramusculosa	NA	8	2	2	2	0	EN	EN B2a	0	EN	NA
Bromeliaceae	Aechmea	Aechmea reclinata	1.0257e+07	312	109	27	44	15	LC or NT	LC or NT B1a+B2a	48.6	LC or NT	LC or NT
Bromeliaceae	Aechmea	Aechmea recurvata	2568230	1288	446	156	258	25	LC or NT	LC or NT B1a+B2a	15.5	LC or NT	LC or NT
Bromeliaceae	Aechmea	Aechmea recurvipetala	NA	4	2	1	1	1	LC or NT	LC or NT B2a	100	CR	NA
Bromeliaceae	Aechmea	Aechmea retusa	397874	88	45	13	19	2	LC or NT	LC or NT B1a+B2a	11.1	LC or NT	LC or NT
Bromeliaceae	Aechmea	Aechmea roberto-anselmoi	NA	8	2	2	2	0	EN	EN B2a	0	EN	NA
Bromeliaceae	Aechmea	Aechmea roberto-seidelii	42686.1	40	15	6	9	1	VU	VU B2a	6.7	VU	LC or NT
Bromeliaceae	Aechmea	Aechmea rodriguesiana	7.03616e+06	344	127	32	50	17	LC or NT	LC or NT B1a+B2a	45.7	LC or NT	LC or NT
Bromeliaceae	Aechmea	Aechmea roeseliae	22524.1	44	17	5	9	3	VU	VU B2a	17.6	VU	LC or NT
Bromeliaceae	Aechmea	Aechmea romeroi	6.06583e+06	356	121	34	51	17	LC or NT	LC or NT B1a+B2a	48.8	LC or NT	LC or NT
Bromeliaceae	Aechmea	Aechmea rubroaristata	1228	16	6	4	4	1	EN	EN B1a+B2a	50	EN	EN
Bromeliaceae	Aechmea	Aechmea rubrolilacina	NA	4	1	1	1	0	CR	CR B2a	0	CR	NA
Bromeliaceae	Aechmea	Aechmea saxicola	70081.6	192	70	20	42	6	LC or NT	LC or NT B1a+B2a	8.6	LC or NT	LC or NT
Bromeliaceae	Aechmea	Aechmea seideliana	NA	8	2	2	2	0	EN	EN B2a	0	EN	NA
Bromeliaceae	Aechmea	Aechmea seidelii	NA	4	1	1	1	0	CR	CR B2a	0	CR	NA
Bromeliaceae	Aechmea	Aechmea sergipana	6.06583e+06	308	108	26	43	14	LC or NT	LC or NT B1a+B2a	48.1	LC or NT	LC or NT
Bromeliaceae	Aechmea	Aechmea serragrandensis	936.8	24	10	3	4	0	EN	EN B1a+B2a	0	EN	EN
Bromeliaceae	Aechmea	Aechmea serrata	12960.5	12	3	3	3	0	EN	EN B2a	0	EN	VU
Bromeliaceae	Aechmea	Aechmea servitensis	964989	92	43	20	21	7	LC or NT	LC or NT B1a+B2a	41.9	LC or NT	LC or NT
Bromeliaceae	Aechmea	Aechmea setigera	1.1937e+07	708	280	99	128	43	LC or NT	LC or NT B1a+B2a	39.3	LC or NT	LC or NT
Bromeliaceae	Aechmea	Aechmea smithiorum	NA	8	2	2	2	1	EN	EN B2a	50	EN	NA
Bromeliaceae	Aechmea	Aechmea spectabilis	176533	32	8	7	8	5	VU	VU B2a	62.5	VU	LC or NT
Bromeliaceae	Aechmea	Aechmea sphaerocephala	280828	48	14	10	12	3	LC or NT	LC or NT B1a+B2a	35.7	LC or NT	LC or NT
Bromeliaceae	Aechmea	Aechmea stelligera	40509	136	45	13	29	2	LC or NT	LC or NT B1a+B2a	4.4	LC or NT	LC or NT
Bromeliaceae	Aechmea	Aechmea stenosepala	5392.5	80	60	3	8	2	VU	VU B1a+B2a	68.3	VU	VU
Bromeliaceae	Aechmea	Aechmea streptocalycoides	456856	80	39	17	18	4	LC or NT	LC or NT B1a+B2a	17.9	LC or NT	LC or NT
Bromeliaceae	Aechmea	Aechmea strobilacea	783136	92	39	18	20	4	LC or NT	LC or NT B1a+B2a	17.9	LC or NT	LC or NT
Bromeliaceae	Aechmea	Aechmea strobilina	6427.8	28	7	5	5	4	EN	EN B2a	85.7	EN	VU
Bromeliaceae	Aechmea	Aechmea subintegerrima	81032	120	39	11	22	10	LC or NT	LC or NT B1a+B2a	64.1	LC or NT	LC or NT
Bromeliaceae	Aechmea	Aechmea sucreana	94	16	13	2	3	1	EN	EN B1a+B2a	23.1	EN	EN
Bromeliaceae	Aechmea	Aechmea sulbahianensis	56025	88	23	9	16	7	LC or NT	LC or NT B1a+B2a	52.2	LC or NT	LC or NT
Bromeliaceae	Aechmea	Aechmea tayoensis	984.8	8	3	2	2	0	EN	EN B1a+B2a	0	EN	EN
Bromeliaceae	Aechmea	Aechmea tentaculifera	1136.8	20	9	3	4	2	EN	EN B1a+B2a	33.3	EN	EN
Bromeliaceae	Aechmea	Aechmea tessmannii	241571	100	27	18	20	2	LC or NT	LC or NT B1a+B2a	14.8	LC or NT	LC or NT
Bromeliaceae	Aechmea	Aechmea tillandsioides	1.0925e+07	2088	770	258	343	98	LC or NT	LC or NT B1a+B2a	41.8	LC or NT	LC or NT
Bromeliaceae	Aechmea	Aechmea tocantina	7.15192e+06	396	154	80	87	27	LC or NT	LC or NT B1a+B2a	37	LC or NT	LC or NT
Bromeliaceae	Aechmea	Aechmea tomentosa	439016	140	59	15	28	5	LC or NT	LC or NT B1a+B2a	23.7	LC or NT	LC or NT
Bromeliaceae	Aechmea	Aechmea triangularis	21605.9	32	11	3	7	1	VU	VU B2a	9.1	VU	LC or NT
Bromeliaceae	Aechmea	Aechmea triticina	395471	56	14	11	13	5	LC or NT	LC or NT B1a+B2a	35.7	LC or NT	LC or NT
Bromeliaceae	Aechmea	Aechmea tuitensis	65	24	9	1	3	0	EN	EN B1a+B2a	0	EN	EN
Bromeliaceae	Aechmea	Aechmea turbinocalyx	340244	136	50	14	23	10	LC or NT	LC or NT B1a+B2a	62	LC or NT	LC or NT
Bromeliaceae	Aechmea	Aechmea vallerandi	1.10959e+07	644	247	93	113	33	LC or NT	LC or NT B1a+B2a	40.9	LC or NT	LC or NT
Bromeliaceae	Aechmea	Aechmea vanhoutteana	538739	84	24	14	18	7	LC or NT	LC or NT B1a+B2a	41.7	LC or NT	LC or NT
Bromeliaceae	Aechmea	Aechmea vasquezii	NA	4	1	1	1	0	CR	CR B2a	0	CR	NA
Bromeliaceae	Aechmea	Aechmea victoriana	25028.5	156	80	9	21	3	LC or NT	LC or NT B1a+B2a	6.2	LC or NT	LC or NT
Bromeliaceae	Aechmea	Aechmea viridipetala	1990.9	20	6	4	5	2	EN	EN B1a+B2a	33.3	EN	EN
Bromeliaceae	Aechmea	Aechmea viridostigma	3052.1	28	12	5	6	2	VU	VU B1a+B2a	58.3	VU	VU
Bromeliaceae	Aechmea	Aechmea warasii	180639	36	13	8	9	1	VU	VU B2a	7.7	VU	LC or NT
Bromeliaceae	Aechmea	Aechmea weberi	3118.2	32	12	5	8	5	VU	VU B1a+B2a	75	VU	VU
Bromeliaceae	Aechmea	Aechmea weilbachii	730736	112	33	9	22	7	LC or NT	LC or NT B1a+B2a	45.5	LC or NT	LC or NT
Bromeliaceae	Aechmea	Aechmea williamsii	727689	36	12	9	9	1	VU	VU B2a	8.3	VU	LC or NT
Bromeliaceae	Aechmea	Aechmea winkleri	712467	64	26	9	13	1	LC or NT	LC or NT B1a+B2a	3.8	LC or NT	LC or NT
Bromeliaceae	Aechmea	Aechmea wittmackiana	133267	16	5	4	4	0	EN	EN B2a	0	EN	LC or NT
Bromeliaceae	Aechmea	Aechmea woronowii	276695	84	45	15	17	7	LC or NT	LC or NT B1a+B2a	44.4	LC or NT	LC or NT
Bromeliaceae	Aechmea	Aechmea zebrina	175790	76	23	13	16	1	LC or NT	LC or NT B1a+B2a	21.7	LC or NT	LC or NT
Bromeliaceae	Alcantarea	Alcantarea vinicolor	1925.7	24	7	4	5	0	EN	EN B1a+B2a	0	EN	EN
Bromeliaceae	Androlepis	Androlepis fragrans	NA	4	1	1	1	0	CR	CR B2a	0	CR	NA
Bromeliaceae	Androlepis	Androlepis skinneri	310245	308	135	33	48	17	LC or NT	LC or NT B1a+B2a	34.1	LC or NT	LC or NT
Bromeliaceae	Araeococcus	Araeococcus chlorocarpus	29061.6	68	31	9	16	5	LC or NT	LC or NT B1a+B2a	38.7	LC or NT	LC or NT
Bromeliaceae	Araeococcus	Araeococcus flagellifolius	5.81077e+06	252	108	55	50	22	LC or NT	LC or NT B1a+B2a	47.2	LC or NT	LC or NT
Bromeliaceae	Araeococcus	Araeococcus goeldianus	105524	24	12	5	5	3	EN	EN B2a	66.7	EN	LC or NT
Bromeliaceae	Araeococcus	Araeococcus micranthus	1.13916e+07	988	382	151	175	53	LC or NT	LC or NT B1a+B2a	41.6	LC or NT	LC or NT
Bromeliaceae	Araeococcus	Araeococcus montanus	1392.2	8	3	2	2	0	EN	EN B1a+B2a	0	EN	EN
Bromeliaceae	Araeococcus	Araeococcus nigropurpureus	31474.4	96	32	10	16	7	LC or NT	LC or NT B1a+B2a	53.1	LC or NT	LC or NT
Bromeliaceae	Araeococcus	Araeococcus parviflorus	1.14235e+07	604	229	52	93	26	LC or NT	LC or NT B1a+B2a	43.7	LC or NT	LC or NT
Bromeliaceae	Araeococcus	Araeococcus pectinatus	56960.3	240	92	11	22	6	LC or NT	LC or NT B1a+B2a	63	LC or NT	LC or NT
Bromeliaceae	Araeococcus	Araeococcus sessiliflorus	26184.5	52	24	10	11	1	LC or NT	LC or NT B1a+B2a	16.7	LC or NT	LC or NT
Bromeliaceae	Billbergia	Billbergia acreana	1539.5	8	5	2	2	2	LC or NT	EN B1a+B2a	100	EN	EN
Bromeliaceae	Billbergia	Billbergia alfonsi-joannis	8.75598e+06	416	144	40	66	14	LC or NT	LC or NT B1a+B2a	36.1	LC or NT	LC or NT
Bromeliaceae	Billbergia	Billbergia ambigua	NA	4	1	1	1	0	CR	CR B2a	0	CR	NA
Bromeliaceae	Billbergia	Billbergia amoena	1.95314e+06	1152	382	118	232	53	LC or NT	LC or NT B1a+B2a	28.5	LC or NT	LC or NT
Bromeliaceae	Billbergia	Billbergia brachysiphon	3.85388e+06	52	23	12	12	2	LC or NT	LC or NT B1a+B2a	8.7	LC or NT	LC or NT
Bromeliaceae	Billbergia	Billbergia bradeana	83341.7	44	18	4	10	3	VU	VU B2a	33.3	VU	LC or NT
Bromeliaceae	Billbergia	Billbergia brasiliensis	140918	24	7	6	6	4	VU	VU B2a	71.4	VU	LC or NT
Bromeliaceae	Billbergia	Billbergia buchholtzii	NA	4	1	1	1	1	LC or NT	LC or NT B2a	100	CR	NA
Bromeliaceae	Billbergia	Billbergia cardenasii	NA	4	1	1	1	0	CR	CR B2a	0	CR	NA
Bromeliaceae	Billbergia	Billbergia castelensis	NA	4	1	1	1	0	CR	CR B2a	0	CR	NA
Bromeliaceae	Billbergia	Billbergia chlorantha	53.5	12	3	2	2	0	EN	EN B1a+B2a	0	EN	EN
Bromeliaceae	Billbergia	Billbergia chlorostica	248556	248	84	31	53	11	LC or NT	LC or NT B1a+B2a	29.8	LC or NT	LC or NT
Bromeliaceae	Billbergia	Billbergia cylindrostachya	99064.9	12	3	3	3	2	EN	EN B2a	66.7	EN	LC or NT
Bromeliaceae	Billbergia	Billbergia dasilvae	NA	4	1	1	1	1	LC or NT	LC or NT B2a	100	CR	NA
Bromeliaceae	Billbergia	Billbergia decora	1.74386e+06	76	24	19	18	6	LC or NT	LC or NT B1a+B2a	41.7	LC or NT	LC or NT
Bromeliaceae	Billbergia	Billbergia distachya	8956886	1344	479	136	236	46	LC or NT	LC or NT B1a+B2a	34.2	LC or NT	LC or NT
Bromeliaceae	Billbergia	Billbergia elegans	804427	212	61	17	39	9	LC or NT	LC or NT B1a+B2a	34.4	LC or NT	LC or NT
Bromeliaceae	Billbergia	Billbergia euphemiae	431377	716	269	59	134	30	LC or NT	LC or NT B1a+B2a	26.8	LC or NT	LC or NT
Bromeliaceae	Billbergia	Billbergia formosa	99104.6	16	4	4	4	0	EN	EN B2a	0	EN	LC or NT
Bromeliaceae	Billbergia	Billbergia horrida	8.2117e+06	560	195	55	95	24	LC or NT	LC or NT B1a+B2a	33.3	LC or NT	LC or NT
Bromeliaceae	Billbergia	Billbergia incarnata	1257.3	12	3	3	3	0	EN	EN B1a+B2a	0	EN	EN
Bromeliaceae	Billbergia	Billbergia iridifolia	1.04147e+06	432	170	55	92	23	LC or NT	LC or NT B1a+B2a	25.3	LC or NT	LC or NT
Bromeliaceae	Billbergia	Billbergia issingiana	3938.2	16	6	3	3	2	EN	EN B1a+B2a	50	EN	EN
Bromeliaceae	Billbergia	Billbergia jandebrabanderi	2710.7	8	4	2	2	1	EN	EN B1a+B2a	50	EN	EN
Bromeliaceae	Billbergia	Billbergia laxiflora	7968.8	60	22	7	12	0	LC or NT	LC or NT B1a+B2a	0	LC or NT	LC or NT
Bromeliaceae	Billbergia	Billbergia leptopoda	315046	92	34	14	20	1	LC or NT	LC or NT B1a+B2a	2.9	LC or NT	LC or NT
Bromeliaceae	Billbergia	Billbergia lietzei	11603.8	60	21	7	14	0	LC or NT	LC or NT B1a+B2a	0	LC or NT	LC or NT
Bromeliaceae	Billbergia	Billbergia lymanii	97386	88	29	14	20	2	LC or NT	LC or NT B1a+B2a	6.9	LC or NT	LC or NT
Bromeliaceae	Billbergia	Billbergia macracantha	43.1	8	3	2	2	0	EN	EN B1a+B2a	0	EN	EN
Bromeliaceae	Billbergia	Billbergia macrocalyx	683361	20	8	5	5	1	EN	EN B2a	12.5	EN	LC or NT
Bromeliaceae	Billbergia	Billbergia macrolepis	3.59489e+06	88	31	17	18	11	LC or NT	LC or NT B1a+B2a	67.7	LC or NT	LC or NT
Bromeliaceae	Billbergia	Billbergia magnifica	1.03046e+06	60	18	14	14	1	LC or NT	LC or NT B1a+B2a	5.6	LC or NT	LC or NT
Bromeliaceae	Billbergia	Billbergia manarae	NA	8	2	2	2	1	EN	EN B2a	50	EN	NA
Bromeliaceae	Billbergia	Billbergia matogrossensis	1341.7	28	11	3	5	0	EN	EN B1a+B2a	0	EN	EN
Bromeliaceae	Billbergia	Billbergia meyerae	1.11984e+06	72	24	18	18	2	LC or NT	LC or NT B1a+B2a	12.5	LC or NT	LC or NT
Bromeliaceae	Billbergia	Billbergia microlepis	1019.1	12	6	3	3	1	EN	EN B1a+B2a	33.3	EN	EN
Bromeliaceae	Billbergia	Billbergia minarum	134865	40	11	8	9	0	VU	VU B2a	0	VU	LC or NT
Bromeliaceae	Billbergia	Billbergia morelii	462038	252	111	35	51	14	LC or NT	LC or NT B1a+B2a	37.8	LC or NT	LC or NT
Bromeliaceae	Billbergia	Billbergia nutans	1.48045e+07	1804	610	227	360	45	LC or NT	LC or NT B1a+B2a	22.1	LC or NT	LC or NT
Bromeliaceae	Billbergia	Billbergia oxysepala	1.08645e+06	28	11	6	7	5	VU	VU B2a	63.6	VU	LC or NT
Bromeliaceae	Billbergia	Billbergia pallidiflora	534233	236	91	29	44	13	LC or NT	LC or NT B1a+B2a	48.4	LC or NT	LC or NT
Bromeliaceae	Billbergia	Billbergia pohliana	10053.6	12	3	3	3	1	EN	EN B2a	33.3	EN	VU
Bromeliaceae	Billbergia	Billbergia porteana	1.12699e+07	860	331	114	165	37	LC or NT	LC or NT B1a+B2a	29.6	LC or NT	LC or NT
Bromeliaceae	Billbergia	Billbergia pyramidalis	6.93279e+06	428	132	50	84	26	LC or NT	LC or NT B1a+B2a	37.9	LC or NT	LC or NT
Bromeliaceae	Billbergia	Billbergia reichardtii	251403	20	5	4	5	1	EN	EN B2a	20	EN	LC or NT
Bromeliaceae	Billbergia	Billbergia robert-readii	6.06583e+06	324	113	29	46	16	LC or NT	LC or NT B1a+B2a	48.7	LC or NT	LC or NT
Bromeliaceae	Billbergia	Billbergia rosea	8.44495e+06	324	112	30	47	14	LC or NT	LC or NT B1a+B2a	46.4	LC or NT	LC or NT
Bromeliaceae	Billbergia	Billbergia rubicunda	NA	4	1	1	1	1	LC or NT	LC or NT B2a	100	CR	NA
Bromeliaceae	Billbergia	Billbergia rupestris	554579	20	9	5	5	1	EN	EN B2a	11.1	EN	LC or NT
Bromeliaceae	Billbergia	Billbergia sanderiana	348749	120	37	20	29	10	LC or NT	LC or NT B1a+B2a	35.1	LC or NT	LC or NT
Bromeliaceae	Billbergia	Billbergia seidelii	NA	4	2	1	1	0	CR	CR B2a	0	CR	NA
Bromeliaceae	Billbergia	Billbergia stenopetala	240464	32	15	7	7	0	VU	VU B2a	0	VU	LC or NT
Bromeliaceae	Billbergia	Billbergia tessmannii	356927	80	34	14	19	1	LC or NT	LC or NT B1a+B2a	5.9	LC or NT	LC or NT
Bromeliaceae	Billbergia	Billbergia tweedieana	482957	156	50	18	33	6	LC or NT	LC or NT B1a+B2a	18	LC or NT	LC or NT
Bromeliaceae	Billbergia	Billbergia velascana	40262.6	16	5	4	4	3	EN	EN B2a	80	EN	LC or NT
Bromeliaceae	Billbergia	Billbergia violacea	1.89838e+06	100	38	24	21	10	LC or NT	LC or NT B1a+B2a	60.5	LC or NT	LC or NT
Bromeliaceae	Billbergia	Billbergia viridiflora	54199.5	48	15	9	10	4	VU	VU B2a	26.7	VU	LC or NT
Bromeliaceae	Billbergia	Billbergia vittata	1.00606e+07	572	202	58	103	30	LC or NT	LC or NT B1a+B2a	42.1	LC or NT	LC or NT
Bromeliaceae	Billbergia	Billbergia zebrina	8.74164e+06	1272	425	165	260	45	LC or NT	LC or NT B1a+B2a	24.9	LC or NT	LC or NT
Bromeliaceae	Brocchinia	Brocchinia acuminata	1.29662e+06	188	76	32	17	11	LC or NT	LC or NT B1a+B2a	90.8	LC or NT	LC or NT
Bromeliaceae	Brocchinia	Brocchinia hitchcockii	7372.7	8	4	2	2	2	LC or NT	EN B2a	100	EN	VU
Bromeliaceae	Brocchinia	Brocchinia paniculata	2.17657e+06	136	51	23	26	9	LC or NT	LC or NT B1a+B2a	49	LC or NT	LC or NT
Bromeliaceae	Brocchinia	Brocchinia tatei	262407	208	90	29	18	10	LC or NT	LC or NT B1a+B2a	87.8	LC or NT	LC or NT
Bromeliaceae	Brocchinia	Brocchinia vestita	27930.9	64	34	6	4	3	EN	EN B2a	97.1	EN	LC or NT
Bromeliaceae	Bromelia	Bromelia epiphytica	NA	8	2	2	2	0	EN	EN B2a	0	EN	NA
Bromeliaceae	Canistrum	Canistrum alagoanum	14131.8	56	21	7	12	1	LC or NT	LC or NT B1a+B2a	14.3	LC or NT	LC or NT
Bromeliaceae	Canistrum	Canistrum ambiguum	5737.6	28	7	7	7	2	VU	VU B1a+B2a	28.6	VU	VU
Bromeliaceae	Canistrum	Canistrum aurantiacum	1.65007e+06	168	68	19	32	7	LC or NT	LC or NT B1a+B2a	29.4	LC or NT	LC or NT
Bromeliaceae	Canistrum	Canistrum auratum	82160.8	44	15	9	11	3	LC or NT	LC or NT B1a+B2a	46.7	LC or NT	LC or NT
Bromeliaceae	Canistrum	Canistrum camacaense	13401.1	68	24	6	14	4	LC or NT	LC or NT B1a+B2a	29.2	LC or NT	LC or NT
Bromeliaceae	Canistrum	Canistrum cyathiforme	6.58185e+06	612	207	69	102	33	LC or NT	LC or NT B1a+B2a	44.9	LC or NT	LC or NT
Bromeliaceae	Canistrum	Canistrum flavipetalum	12158.8	24	12	4	4	2	EN	EN B2a	58.3	EN	VU
Bromeliaceae	Canistrum	Canistrum fosterianum	691316	24	13	5	5	2	EN	EN B2a	76.9	EN	LC or NT
Bromeliaceae	Canistrum	Canistrum fragrans	1.21883e+07	948	328	88	159	41	LC or NT	LC or NT B1a+B2a	42.7	LC or NT	LC or NT
Bromeliaceae	Canistrum	Canistrum giganteum	6.56782e+06	420	142	41	65	23	LC or NT	LC or NT B1a+B2a	48.6	LC or NT	LC or NT
Bromeliaceae	Canistrum	Canistrum guzmanioides	279.7	20	10	2	3	2	EN	EN B1a+B2a	70	EN	EN
Bromeliaceae	Canistrum	Canistrum improcerum	NA	4	2	1	1	0	CR	CR B2a	0	CR	NA
Bromeliaceae	Canistrum	Canistrum lanigerum	5044.2	16	4	4	4	0	EN	EN B2a	0	EN	VU
Bromeliaceae	Canistrum	Canistrum montanum	78026.6	68	27	8	10	3	VU	VU B2a	66.7	VU	LC or NT
Bromeliaceae	Canistrum	Canistrum paulistanum	1528.1	24	6	4	4	1	EN	EN B1a+B2a	50	EN	EN
Bromeliaceae	Canistrum	Canistrum perplexum	5033.4	32	9	6	8	1	VU	VU B1a+B2a	22.2	VU	VU
Bromeliaceae	Canistrum	Canistrum pickelii	7578.5	52	22	7	11	0	LC or NT	LC or NT B1a+B2a	0	LC or NT	LC or NT
Bromeliaceae	Canistrum	Canistrum sandrae	3119.4	12	3	3	3	2	EN	EN B1a+B2a	66.7	EN	EN
Bromeliaceae	Canistrum	Canistrum seidelianum	60705.2	52	14	9	12	3	LC or NT	LC or NT B1a+B2a	35.7	LC or NT	LC or NT
Bromeliaceae	Canistrum	Canistrum superbum	7.04988e+06	484	181	52	74	27	LC or NT	LC or NT B1a+B2a	50.3	LC or NT	LC or NT
Bromeliaceae	Canistrum	Canistrum tenuisepalum	NA	4	1	1	1	0	CR	CR B2a	0	CR	NA
Bromeliaceae	Canistrum	Canistrum triangulare	2145.5	24	11	4	5	1	EN	EN B1a+B2a	9.1	EN	EN
Bromeliaceae	Catopsis	Catopsis berteroana	1.30606e+07	1068	391	140	196	63	LC or NT	LC or NT B1a+B2a	42.5	LC or NT	LC or NT
Bromeliaceae	Catopsis	Catopsis compacta	256657	100	30	16	16	4	LC or NT	LC or NT B1a+B2a	43.3	LC or NT	LC or NT
Bromeliaceae	Catopsis	Catopsis delicatula	7912.8	24	7	5	5	0	EN	EN B2a	0	EN	VU
Bromeliaceae	Catopsis	Catopsis floribunda	1.0525e+07	492	157	66	85	30	LC or NT	LC or NT B1a+B2a	45.9	LC or NT	LC or NT
Bromeliaceae	Catopsis	Catopsis juncifolia	370588	124	43	18	23	10	LC or NT	LC or NT B1a+B2a	30.2	LC or NT	LC or NT
Bromeliaceae	Catopsis	Catopsis micrantha	17930.3	80	23	10	16	7	LC or NT	LC or NT B1a+B2a	56.5	LC or NT	LC or NT
Bromeliaceae	Catopsis	Catopsis minimiflora	114751	20	7	4	5	2	EN	EN B2a	57.1	EN	LC or NT
Bromeliaceae	Catopsis	Catopsis montana	6.06583e+06	308	108	26	43	14	LC or NT	LC or NT B1a+B2a	48.1	LC or NT	LC or NT
Bromeliaceae	Catopsis	Catopsis morreniana	6167045	740	258	72	117	37	LC or NT	LC or NT B1a+B2a	35.7	LC or NT	LC or NT
Bromeliaceae	Catopsis	Catopsis nitida	1.05219e+07	928	308	79	137	47	LC or NT	LC or NT B1a+B2a	39	LC or NT	LC or NT
Bromeliaceae	Catopsis	Catopsis nutans	1.01103e+07	1744	615	153	284	76	LC or NT	LC or NT B1a+B2a	36.4	LC or NT	LC or NT
Bromeliaceae	Catopsis	Catopsis occulta	6.06583e+06	324	112	29	47	15	LC or NT	LC or NT B1a+B2a	47.3	LC or NT	LC or NT
Bromeliaceae	Catopsis	Catopsis oerstediana	NA	8	2	2	2	1	EN	EN B2a	50	EN	NA
Bromeliaceae	Catopsis	Catopsis paniculata	6.5155e+06	988	335	87	159	44	LC or NT	LC or NT B1a+B2a	37.6	LC or NT	LC or NT
Bromeliaceae	Catopsis	Catopsis pisiformis	4117.6	20	5	4	4	2	EN	EN B1a+B2a	40	EN	EN
Bromeliaceae	Catopsis	Catopsis sessiliflora	1.4241e+07	2264	856	207	384	105	LC or NT	LC or NT B1a+B2a	34	LC or NT	LC or NT
Bromeliaceae	Catopsis	Catopsis subulata	6071473	432	153	45	68	19	LC or NT	LC or NT B1a+B2a	40.5	LC or NT	LC or NT
Bromeliaceae	Catopsis	Catopsis wangerinii	398198	308	111	29	54	15	LC or NT	LC or NT B1a+B2a	29.7	LC or NT	LC or NT
Bromeliaceae	Catopsis	Catopsis wawreana	942025	96	24	18	21	8	LC or NT	LC or NT B1a+B2a	37.5	LC or NT	LC or NT
Bromeliaceae	Connellia	Connellia caricifolia	5262	20	7	2	5	2	EN	EN B2a	28.6	EN	VU
Bromeliaceae	Disteganthus	Disteganthus basilateralis	814074	76	23	10	10	4	VU	VU B2a	60.9	VU	LC or NT
Bromeliaceae	Disteganthus	Disteganthus calatheoides	4764.8	16	4	4	3	3	LC or NT	EN B1a+B2a	100	EN	EN
Bromeliaceae	Disteganthus	Disteganthus gracieae	NA	4	1	1	1	1	LC or NT	LC or NT B2a	100	CR	NA
Bromeliaceae	Disteganthus	Disteganthus lateralis	576930	104	36	22	20	7	LC or NT	LC or NT B1a+B2a	47.2	LC or NT	LC or NT
Bromeliaceae	Disteganthus	Disteganthus morii	NA	8	2	1	1	1	LC or NT	LC or NT B2a	100	CR	NA
Bromeliaceae	Fernseea	Fernseea bocainensis	1149.7	16	5	3	4	0	EN	EN B1a+B2a	0	EN	EN
Bromeliaceae	Fosterella	Fosterella penduliflora	4.06627e+06	156	47	28	32	10	LC or NT	LC or NT B1a+B2a	38.3	LC or NT	LC or NT
Bromeliaceae	Glomeropitcairnia	Glomeropitcairnia erectiflora	NA	4	1	1	1	1	LC or NT	LC or NT B2a	100	CR	NA
Bromeliaceae	Glomeropitcairnia	Glomeropitcairnia penduliflora	NA	4	1	1	1	0	CR	CR B2a	0	CR	NA
Bromeliaceae	Greigia	Greigia rohwederi	3158.8	12	5	3	3	2	EN	EN B1a+B2a	80	EN	EN
Bromeliaceae	Guzmania	Guzmania acorifolia	NA	8	2	2	2	1	EN	EN B2a	50	EN	NA
Bromeliaceae	Guzmania	Guzmania acuminata	108889	108	54	13	17	1	LC or NT	LC or NT B1a+B2a	9.3	LC or NT	LC or NT
Bromeliaceae	Guzmania	Guzmania acutispica	7167.3	12	6	3	3	1	EN	EN B2a	33.3	EN	VU
Bromeliaceae	Guzmania	Guzmania adscendens	NA	4	1	1	1	0	CR	CR B2a	0	CR	NA
Bromeliaceae	Guzmania	Guzmania aequatorialis	4184.9	24	6	2	3	0	EN	EN B1a+B2a	0	EN	EN
Bromeliaceae	Guzmania	Guzmania albescens	39.4	16	4	1	2	0	EN	EN B1a+B2a	0	EN	EN
Bromeliaceae	Guzmania	Guzmania alborosea	65866.6	80	23	12	16	3	LC or NT	LC or NT B1a+B2a	26.1	LC or NT	LC or NT
Bromeliaceae	Guzmania	Guzmania alcantareoides	NA	4	1	1	1	0	CR	CR B2a	0	CR	NA
Bromeliaceae	Guzmania	Guzmania alliodora	NA	4	1	1	1	0	CR	CR B2a	0	CR	NA
Bromeliaceae	Guzmania	Guzmania altsonii	4.47454e+06	220	117	33	38	10	LC or NT	LC or NT B1a+B2a	39.3	LC or NT	LC or NT
Bromeliaceae	Guzmania	Guzmania amplectens	170717	56	14	8	12	2	LC or NT	LC or NT B1a+B2a	14.3	LC or NT	LC or NT
Bromeliaceae	Guzmania	Guzmania andreana	85054	28	7	3	5	2	EN	EN B2a	42.9	EN	LC or NT
Bromeliaceae	Guzmania	Guzmania andreettae	4163.4	20	8	4	5	1	EN	EN B1a+B2a	25	EN	EN
Bromeliaceae	Guzmania	Guzmania angustifolia	509072	460	146	52	79	27	LC or NT	LC or NT B1a+B2a	47.3	LC or NT	LC or NT
Bromeliaceae	Guzmania	Guzmania apiculata	NA	4	1	1	1	0	CR	CR B2a	0	CR	NA
Bromeliaceae	Guzmania	Guzmania armeniaca	NA	4	1	1	1	1	LC or NT	LC or NT B2a	100	CR	NA
Bromeliaceae	Guzmania	Guzmania asplundii	266691	244	84	22	43	5	LC or NT	LC or NT B1a+B2a	14.3	LC or NT	LC or NT
Bromeliaceae	Guzmania	Guzmania atrocastanea	25591.7	32	11	7	8	1	VU	VU B2a	9.1	VU	LC or NT
Bromeliaceae	Guzmania	Guzmania attenuata	93549.1	20	5	5	5	2	EN	EN B2a	40	EN	LC or NT
Bromeliaceae	Guzmania	Guzmania bakeri	87496	60	17	7	12	3	LC or NT	LC or NT B1a+B2a	35.3	LC or NT	LC or NT
Bromeliaceae	Guzmania	Guzmania bergae	NA	8	2	2	2	1	EN	EN B2a	50	EN	NA
Bromeliaceae	Guzmania	Guzmania berteroana	46442	76	22	10	15	6	LC or NT	LC or NT B1a+B2a	50	LC or NT	LC or NT
Bromeliaceae	Guzmania	Guzmania besseae	6.294e+06	444	152	36	61	20	LC or NT	LC or NT B1a+B2a	50.7	LC or NT	LC or NT
Bromeliaceae	Guzmania	Guzmania betancurii	8	8	3	1	2	1	EN	EN B1a+B2a	33.3	EN	EN
Bromeliaceae	Guzmania	Guzmania bicolor	184	28	7	2	4	0	EN	EN B1a+B2a	0	EN	EN
Bromeliaceae	Guzmania	Guzmania bipartita	1.39982e+06	64	28	13	16	4	LC or NT	LC or NT B1a+B2a	17.9	LC or NT	LC or NT
Bromeliaceae	Guzmania	Guzmania bismarckii	89728.2	16	6	4	4	0	EN	EN B2a	0	EN	LC or NT
Bromeliaceae	Guzmania	Guzmania blassii	8796.2	60	19	9	10	4	VU	VU B1a+B2a	42.1	VU	VU
Bromeliaceae	Guzmania	Guzmania bracteosa	6.06583e+06	396	136	38	61	17	LC or NT	LC or NT B1a+B2a	40.4	LC or NT	LC or NT
Bromeliaceae	Guzmania	Guzmania brasiliensis	5.33095e+06	304	128	55	58	17	LC or NT	LC or NT B1a+B2a	40.6	LC or NT	LC or NT
Bromeliaceae	Guzmania	Guzmania brevispatha	NA	8	2	2	2	0	EN	EN B2a	0	EN	NA
Bromeliaceae	Guzmania	Guzmania butcheri	4321.7	12	3	2	3	2	EN	EN B1a+B2a	66.7	EN	EN
Bromeliaceae	Guzmania	Guzmania calamifolia	6.06727e+06	500	178	37	67	23	LC or NT	LC or NT B1a+B2a	55.6	LC or NT	LC or NT
Bromeliaceae	Guzmania	Guzmania calothyrsa	2.96564e+06	116	46	27	29	4	LC or NT	LC or NT B1a+B2a	19.6	LC or NT	LC or NT
Bromeliaceae	Guzmania	Guzmania candelabrum	30993.3	36	14	6	8	4	VU	VU B2a	42.9	VU	LC or NT
Bromeliaceae	Guzmania	Guzmania caricifolia	1158.8	16	4	3	4	1	EN	EN B1a+B2a	25	EN	EN
Bromeliaceae	Guzmania	Guzmania cinnabarina	NA	4	1	1	1	1	LC or NT	LC or NT B2a	100	CR	NA
Bromeliaceae	Guzmania	Guzmania circinnata	32276.5	56	17	5	8	3	VU	VU B2a	64.7	VU	LC or NT
Bromeliaceae	Guzmania	Guzmania claviformis	360261	116	58	16	21	4	LC or NT	LC or NT B1a+B2a	12.1	LC or NT	LC or NT
Bromeliaceae	Guzmania	Guzmania compacta	68061.4	36	12	6	7	2	VU	VU B2a	50	VU	LC or NT
Bromeliaceae	Guzmania	Guzmania condensata	6.06583e+06	344	120	31	50	17	LC or NT	LC or NT B1a+B2a	48.3	LC or NT	LC or NT
Bromeliaceae	Guzmania	Guzmania condorensis	2431.4	36	9	4	6	0	VU	VU B1a+B2a	0	VU	VU
Bromeliaceae	Guzmania	Guzmania confinis	1.57507e+06	68	23	14	15	5	LC or NT	LC or NT B1a+B2a	30.4	LC or NT	LC or NT
Bromeliaceae	Guzmania	Guzmania confusa	130458	136	61	14	25	2	LC or NT	LC or NT B1a+B2a	9.8	LC or NT	LC or NT
Bromeliaceae	Guzmania	Guzmania conglomerata	31775	40	10	4	6	4	VU	VU B2a	80	VU	LC or NT
Bromeliaceae	Guzmania	Guzmania conifera	582943	64	29	12	16	4	LC or NT	LC or NT B1a+B2a	27.6	LC or NT	LC or NT
Bromeliaceae	Guzmania	Guzmania coriostachya	9.74359e+06	704	250	70	116	40	LC or NT	LC or NT B1a+B2a	38.8	LC or NT	LC or NT
Bromeliaceae	Guzmania	Guzmania corniculata	NA	4	1	1	1	0	CR	CR B2a	0	CR	NA
Bromeliaceae	Guzmania	Guzmania cuatrecasasii	23128.6	12	4	3	3	0	EN	EN B2a	0	EN	LC or NT
Bromeliaceae	Guzmania	Guzmania cuzcoensis	6.26413e+06	324	115	29	47	15	LC or NT	LC or NT B1a+B2a	47	LC or NT	LC or NT
Bromeliaceae	Guzmania	Guzmania cylindrica	220.7	12	3	2	3	0	EN	EN B1a+B2a	0	EN	EN
Bromeliaceae	Guzmania	Guzmania dalstroemii	5719.1	8	4	2	2	1	EN	EN B2a	50	EN	VU
Bromeliaceae	Guzmania	Guzmania danielii	682668	76	20	9	13	3	LC or NT	LC or NT B1a+B2a	40	LC or NT	LC or NT
Bromeliaceae	Guzmania	Guzmania darienensis	62.7	12	4	2	2	1	EN	EN B1a+B2a	50	EN	EN
Bromeliaceae	Guzmania	Guzmania delicatula	5134.2	24	6	2	3	2	EN	EN B2a	83.3	EN	VU
Bromeliaceae	Guzmania	Guzmania densiflora	130333	60	20	7	10	3	VU	VU B2a	40	VU	LC or NT
Bromeliaceae	Guzmania	Guzmania densispica	NA	4	1	1	1	0	CR	CR B2a	0	CR	NA
Bromeliaceae	Guzmania	Guzmania desautelsii	980395	428	139	28	51	22	LC or NT	LC or NT B1a+B2a	67.6	LC or NT	LC or NT
Bromeliaceae	Guzmania	Guzmania devansayana	10825.3	40	21	6	8	1	VU	VU B1a+B2a	19	VU	VU
Bromeliaceae	Guzmania	Guzmania diffusa	238266	120	44	19	24	6	LC or NT	LC or NT B1a+B2a	25	LC or NT	LC or NT
Bromeliaceae	Guzmania	Guzmania dissitiflora	2.78098e+06	124	36	18	22	10	LC or NT	LC or NT B1a+B2a	63.9	LC or NT	LC or NT
Bromeliaceae	Guzmania	Guzmania donnell-smithii	179941	336	115	32	51	21	LC or NT	LC or NT B1a+B2a	63.5	LC or NT	LC or NT
Bromeliaceae	Guzmania	Guzmania dudleyi	31376.5	20	7	3	3	1	EN	EN B2a	14.3	EN	LC or NT
Bromeliaceae	Guzmania	Guzmania dussii	NA	4	2	1	1	1	LC or NT	LC or NT B2a	100	CR	NA
Bromeliaceae	Guzmania	Guzmania ecuadorensis	55.4	16	4	2	3	1	EN	EN B1a+B2a	25	EN	EN
Bromeliaceae	Guzmania	Guzmania eduardi	187808	28	7	6	7	2	VU	VU B2a	28.6	VU	LC or NT
Bromeliaceae	Guzmania	Guzmania ekmanii	14430.6	12	4	3	3	2	EN	EN B2a	75	EN	VU
Bromeliaceae	Guzmania	Guzmania elvallensis	98.7	12	4	2	3	1	EN	EN B1a+B2a	50	EN	EN
Bromeliaceae	Guzmania	Guzmania erythrolepis	19566.5	12	3	3	3	2	EN	EN B2a	66.7	EN	VU
Bromeliaceae	Guzmania	Guzmania farciminiformis	34812.2	92	44	13	19	1	LC or NT	LC or NT B1a+B2a	4.5	LC or NT	LC or NT
Bromeliaceae	Guzmania	Guzmania fawcettii	NA	4	2	1	1	1	LC or NT	LC or NT B2a	100	CR	NA
Bromeliaceae	Guzmania	Guzmania ferruginea	8	8	5	1	1	0	CR	CR B1a	0	EN	CR
Bromeliaceae	Guzmania	Guzmania filiorum	4184.9	24	9	4	6	3	VU	VU B1a+B2a	66.7	VU	VU
Bromeliaceae	Guzmania	Guzmania flagellata	391.5	24	9	2	3	1	EN	EN B1a+B2a	66.7	EN	EN
Bromeliaceae	Guzmania	Guzmania foetida	13743.6	56	28	6	11	0	LC or NT	LC or NT B1a+B2a	0	LC or NT	LC or NT
Bromeliaceae	Guzmania	Guzmania formosa	118.9	12	3	2	3	0	EN	EN B1a+B2a	0	EN	EN
Bromeliaceae	Guzmania	Guzmania fosteriana	6.08138e+06	376	127	35	57	16	LC or NT	LC or NT B1a+B2a	43.3	LC or NT	LC or NT
Bromeliaceae	Guzmania	Guzmania garciaensis	21331	72	44	7	13	2	LC or NT	LC or NT B1a+B2a	9.1	LC or NT	LC or NT
Bromeliaceae	Guzmania	Guzmania glaucophylla	14954.5	36	15	4	5	1	EN	EN B2a	60	EN	VU
Bromeliaceae	Guzmania	Guzmania globosa	6.23875e+06	436	158	38	63	20	LC or NT	LC or NT B1a+B2a	41.1	LC or NT	LC or NT
Bromeliaceae	Guzmania	Guzmania glomerata	455962	284	85	37	49	19	LC or NT	LC or NT B1a+B2a	50.6	LC or NT	LC or NT
Bromeliaceae	Guzmania	Guzmania gloriosa	1.57229e+06	180	61	24	38	9	LC or NT	LC or NT B1a+B2a	27.9	LC or NT	LC or NT
Bromeliaceae	Guzmania	Guzmania goudotiana	NA	4	1	1	1	0	CR	CR B2a	0	CR	NA
Bromeliaceae	Guzmania	Guzmania gracilis	4	4	3	1	1	0	CR	CR B1a	0	EN	CR
Bromeliaceae	Guzmania	Guzmania graminifolia	243361	148	51	8	20	4	LC or NT	LC or NT B1a+B2a	17.6	LC or NT	LC or NT
Bromeliaceae	Guzmania	Guzmania harlingii	1902.9	16	4	2	4	0	EN	EN B1a+B2a	0	EN	EN
Bromeliaceae	Guzmania	Guzmania henniae	158	12	3	2	3	0	EN	EN B1a+B2a	0	EN	EN
Bromeliaceae	Guzmania	Guzmania herrerae	6473.2	44	14	5	10	4	VU	VU B1a+B2a	57.1	VU	VU
Bromeliaceae	Guzmania	Guzmania hirtzii	31022.7	40	12	6	9	3	VU	VU B2a	41.7	VU	LC or NT
Bromeliaceae	Guzmania	Guzmania hitchcockiana	507012	84	23	14	18	1	LC or NT	LC or NT B1a+B2a	17.4	LC or NT	LC or NT
Bromeliaceae	Guzmania	Guzmania hollinensis	473868	88	37	16	21	5	LC or NT	LC or NT B1a+B2a	13.5	LC or NT	LC or NT
Bromeliaceae	Guzmania	Guzmania inexpectata	NA	4	1	1	1	0	CR	CR B2a	0	CR	NA
Bromeliaceae	Guzmania	Guzmania inkaterrae	88981.4	20	5	5	5	2	EN	EN B2a	40	EN	LC or NT
Bromeliaceae	Guzmania	Guzmania izkoi	NA	8	2	2	2	1	EN	EN B2a	50	EN	NA
Bromeliaceae	Guzmania	Guzmania jaramilloi	345314	136	74	14	22	4	LC or NT	LC or NT B1a+B2a	5.4	LC or NT	LC or NT
Bromeliaceae	Guzmania	Guzmania kalbreyeri	58990.7	68	18	7	13	5	LC or NT	LC or NT B1a+B2a	44.4	LC or NT	LC or NT
Bromeliaceae	Guzmania	Guzmania kareniae	158609	24	6	5	5	1	EN	EN B2a	16.7	EN	LC or NT
Bromeliaceae	Guzmania	Guzmania kentii	63.4	16	4	1	3	0	EN	EN B1a+B2a	0	EN	EN
Bromeliaceae	Guzmania	Guzmania killipiana	6.42548e+06	400	158	43	62	24	LC or NT	LC or NT B1a+B2a	53.2	LC or NT	LC or NT
Bromeliaceae	Guzmania	Guzmania kraenzliniana	74230.3	32	9	5	7	1	VU	VU B2a	11.1	VU	LC or NT
Bromeliaceae	Guzmania	Guzmania kressii	NA	4	1	1	1	1	LC or NT	LC or NT B2a	100	CR	NA
Bromeliaceae	Guzmania	Guzmania laeta	6.06583e+06	340	120	27	48	17	LC or NT	LC or NT B1a+B2a	51.7	LC or NT	LC or NT
Bromeliaceae	Guzmania	Guzmania lehmanniana	76041.7	92	73	7	14	3	LC or NT	LC or NT B1a+B2a	4.1	LC or NT	LC or NT
Bromeliaceae	Guzmania	Guzmania lemeana	16259.2	12	6	3	3	0	EN	EN B2a	0	EN	VU
Bromeliaceae	Guzmania	Guzmania leonard-kentiana	NA	4	1	1	1	0	CR	CR B2a	0	CR	NA
Bromeliaceae	Guzmania	Guzmania lepidota	2467.6	8	3	2	2	1	EN	EN B1a+B2a	33.3	EN	EN
Bromeliaceae	Guzmania	Guzmania lindenii	6.30129e+06	316	112	28	45	14	LC or NT	LC or NT B1a+B2a	46.4	LC or NT	LC or NT
Bromeliaceae	Guzmania	Guzmania lingulata	1.22009e+07	2732	1010	334	459	134	LC or NT	LC or NT B1a+B2a	44.2	LC or NT	LC or NT
Bromeliaceae	Guzmania	Guzmania loeflingiana	NA	4	1	1	1	1	LC or NT	LC or NT B2a	100	CR	NA
Bromeliaceae	Guzmania	Guzmania longibracteata	NA	4	1	1	1	0	CR	CR B2a	0	CR	NA
Bromeliaceae	Guzmania	Guzmania longipetala	20.5	12	3	2	2	0	EN	EN B1a+B2a	0	EN	EN
Bromeliaceae	Guzmania	Guzmania loraxiana	6993.7	44	13	4	5	3	EN	EN B2a	76.9	EN	VU
Bromeliaceae	Guzmania	Guzmania lychnis	342619	16	5	4	4	2	EN	EN B2a	60	EN	LC or NT
Bromeliaceae	Guzmania	Guzmania macropoda	426.4	36	13	2	5	2	EN	EN B1a+B2a	69.2	EN	EN
Bromeliaceae	Guzmania	Guzmania madisonii	6.05969e+06	396	146	33	60	15	LC or NT	LC or NT B1a+B2a	36.3	LC or NT	LC or NT
Bromeliaceae	Guzmania	Guzmania marantoidea	6.31323e+06	384	141	42	59	20	LC or NT	LC or NT B1a+B2a	50.4	LC or NT	LC or NT
Bromeliaceae	Guzmania	Guzmania melinonis	4702244	400	174	58	76	16	LC or NT	LC or NT B1a+B2a	25.9	LC or NT	LC or NT
Bromeliaceae	Guzmania	Guzmania membranacea	2.61978e+06	20	5	4	5	2	EN	EN B2a	40	EN	LC or NT
Bromeliaceae	Guzmania	Guzmania mitis	7898349	384	129	42	61	25	LC or NT	LC or NT B1a+B2a	49.6	LC or NT	LC or NT
Bromeliaceae	Guzmania	Guzmania monostachia	1.30344e+07	1612	515	169	276	68	LC or NT	LC or NT B1a+B2a	34.8	LC or NT	LC or NT
Bromeliaceae	Guzmania	Guzmania morreniana	6.24993e+06	432	168	43	67	17	LC or NT	LC or NT B1a+B2a	36.3	LC or NT	LC or NT
Bromeliaceae	Guzmania	Guzmania mosquerae	413698	144	67	18	26	5	LC or NT	LC or NT B1a+B2a	31.3	LC or NT	LC or NT
Bromeliaceae	Guzmania	Guzmania mucronata	NA	8	2	2	2	1	EN	EN B2a	50	EN	NA
Bromeliaceae	Guzmania	Guzmania multiflora	274422	120	34	19	25	10	LC or NT	LC or NT B1a+B2a	44.1	LC or NT	LC or NT
Bromeliaceae	Guzmania	Guzmania musaica	7.13422e+06	812	267	65	114	33	LC or NT	LC or NT B1a+B2a	46.8	LC or NT	LC or NT
Bromeliaceae	Guzmania	Guzmania nangaritzae	NA	4	2	1	1	0	CR	CR B2a	0	CR	NA
Bromeliaceae	Guzmania	Guzmania nicaraguensis	464284	436	146	43	67	33	LC or NT	LC or NT B1a+B2a	56.2	LC or NT	LC or NT
Bromeliaceae	Guzmania	Guzmania nubicola	764.8	8	3	1	2	2	LC or NT	EN B1a+B2a	100	EN	EN
Bromeliaceae	Guzmania	Guzmania nubigena	17567.2	12	3	3	3	2	EN	EN B2a	66.7	EN	VU
Bromeliaceae	Guzmania	Guzmania obtusiloba	54772.6	136	46	13	17	10	LC or NT	LC or NT B1a+B2a	78.3	LC or NT	LC or NT
Bromeliaceae	Guzmania	Guzmania oligantha	NA	4	1	1	1	1	LC or NT	LC or NT B2a	100	CR	NA
Bromeliaceae	Guzmania	Guzmania osyana	2782.9	12	3	3	3	0	EN	EN B1a+B2a	0	EN	EN
Bromeliaceae	Guzmania	Guzmania pallida	NA	4	1	1	1	0	CR	CR B2a	0	CR	NA
Bromeliaceae	Guzmania	Guzmania palustris	NA	4	1	1	1	1	LC or NT	LC or NT B2a	100	CR	NA
Bromeliaceae	Guzmania	Guzmania panamensis	NA	4	1	1	1	1	LC or NT	LC or NT B2a	100	CR	NA
Bromeliaceae	Guzmania	Guzmania paniculata	6.32671e+06	424	159	40	65	18	LC or NT	LC or NT B1a+B2a	42.8	LC or NT	LC or NT
Bromeliaceae	Guzmania	Guzmania pattersoniae	6.06583e+06	336	121	28	48	15	LC or NT	LC or NT B1a+B2a	45.5	LC or NT	LC or NT
Bromeliaceae	Guzmania	Guzmania patula	5.52103e+06	336	110	47	58	21	LC or NT	LC or NT B1a+B2a	44.5	LC or NT	LC or NT
Bromeliaceae	Guzmania	Guzmania pearcei	569273	184	78	26	36	15	LC or NT	LC or NT B1a+B2a	43.6	LC or NT	LC or NT
Bromeliaceae	Guzmania	Guzmania pennellii	274871	24	6	5	5	2	EN	EN B2a	33.3	EN	LC or NT
Bromeliaceae	Guzmania	Guzmania plicatifolia	37739.8	308	127	15	32	14	LC or NT	LC or NT B1a+B2a	70.9	LC or NT	LC or NT
Bromeliaceae	Guzmania	Guzmania plumieri	61.6	12	3	2	3	3	LC or NT	EN B1a+B2a	100	EN	EN
Bromeliaceae	Guzmania	Guzmania polycephala	55195.4	152	43	17	22	10	LC or NT	LC or NT B1a+B2a	67.4	LC or NT	LC or NT
Bromeliaceae	Guzmania	Guzmania poortmanii	NA	8	2	2	2	1	EN	EN B2a	50	EN	NA
Bromeliaceae	Guzmania	Guzmania pseudodissitiflora	8	8	4	1	1	0	CR	CR B1a	0	EN	CR
Bromeliaceae	Guzmania	Guzmania pseudospectabilis	17560.5	24	6	5	6	1	VU	VU B1a+B2a	16.7	VU	VU
Bromeliaceae	Guzmania	Guzmania pungens	96881.9	16	4	4	4	0	EN	EN B2a	0	EN	LC or NT
Bromeliaceae	Guzmania	Guzmania puyoensis	23001.4	20	7	4	5	0	EN	EN B2a	0	EN	LC or NT
Bromeliaceae	Guzmania	Guzmania radiata	NA	4	1	1	1	1	LC or NT	LC or NT B2a	100	CR	NA
Bromeliaceae	Guzmania	Guzmania rauhiana	19720.5	20	5	4	4	2	EN	EN B2a	40	EN	VU
Bromeliaceae	Guzmania	Guzmania regalis	10340.7	44	11	4	8	1	VU	VU B1a+B2a	9.1	VU	VU
Bromeliaceae	Guzmania	Guzmania remyi	49878.7	120	35	12	24	2	LC or NT	LC or NT B1a+B2a	11.4	LC or NT	LC or NT
Bromeliaceae	Guzmania	Guzmania retusa	9.26002e+06	412	158	46	66	20	LC or NT	LC or NT B1a+B2a	43	LC or NT	LC or NT
Bromeliaceae	Guzmania	Guzmania rhonhofiana	6.5628e+06	396	132	41	64	17	LC or NT	LC or NT B1a+B2a	43.2	LC or NT	LC or NT
Bromeliaceae	Guzmania	Guzmania roezlii	1.00044e+07	456	172	54	77	24	LC or NT	LC or NT B1a+B2a	41.9	LC or NT	LC or NT
Bromeliaceae	Guzmania	Guzmania rosea	179015	152	48	16	24	6	LC or NT	LC or NT B1a+B2a	33.3	LC or NT	LC or NT
Bromeliaceae	Guzmania	Guzmania roseiflora	5887.8	20	8	4	5	1	EN	EN B2a	12.5	EN	VU
Bromeliaceae	Guzmania	Guzmania rubrolutea	283.1	16	4	2	3	1	EN	EN B1a+B2a	50	EN	EN
Bromeliaceae	Guzmania	Guzmania sanguinea	1.1567e+07	436	151	43	64	18	LC or NT	LC or NT B1a+B2a	46.4	LC or NT	LC or NT
Bromeliaceae	Guzmania	Guzmania scandens	40023.7	240	86	15	20	12	LC or NT	LC or NT B1a+B2a	82.6	LC or NT	LC or NT
Bromeliaceae	Guzmania	Guzmania scherzeriana	6.35959e+06	872	279	96	146	56	LC or NT	LC or NT B1a+B2a	50.2	LC or NT	LC or NT
Bromeliaceae	Guzmania	Guzmania septata	35577.5	48	21	10	11	2	LC or NT	LC or NT B1a+B2a	19	LC or NT	LC or NT
Bromeliaceae	Guzmania	Guzmania sibundoyorum	116504	52	19	10	11	3	LC or NT	LC or NT B1a+B2a	42.1	LC or NT	LC or NT
Bromeliaceae	Guzmania	Guzmania skotakii	12	12	4	1	2	1	EN	EN B1a+B2a	50	EN	EN
Bromeliaceae	Guzmania	Guzmania sneidernii	25097.2	16	4	4	4	1	EN	EN B2a	25	EN	LC or NT
Bromeliaceae	Guzmania	Guzmania spectabilis	NA	4	1	1	1	1	LC or NT	LC or NT B2a	100	CR	NA
Bromeliaceae	Guzmania	Guzmania sprucei	3.19144e+06	412	154	33	60	21	LC or NT	LC or NT B1a+B2a	52.6	LC or NT	LC or NT
Bromeliaceae	Guzmania	Guzmania squarrosa	9.80617e+06	920	359	114	162	59	LC or NT	LC or NT B1a+B2a	41.5	LC or NT	LC or NT
Bromeliaceae	Guzmania	Guzmania stenostachya	15932.8	184	64	11	20	7	LC or NT	LC or NT B1a+B2a	60.9	LC or NT	LC or NT
Bromeliaceae	Guzmania	Guzmania striata	NA	8	2	2	2	0	EN	EN B2a	0	EN	NA
Bromeliaceae	Guzmania	Guzmania stricta	NA	4	1	1	1	0	CR	CR B2a	0	CR	NA
Bromeliaceae	Guzmania	Guzmania strobilantha	246686	68	36	10	13	3	LC or NT	LC or NT B1a+B2a	44.4	LC or NT	LC or NT
Bromeliaceae	Guzmania	Guzmania subcorymbosa	6.08278e+06	448	148	41	67	23	LC or NT	LC or NT B1a+B2a	51.4	LC or NT	LC or NT
Bromeliaceae	Guzmania	Guzmania tarapotina	762605	132	58	22	28	6	LC or NT	LC or NT B1a+B2a	27.6	LC or NT	LC or NT
Bromeliaceae	Guzmania	Guzmania tenuifolia	159994	20	7	5	5	1	EN	EN B2a	28.6	EN	LC or NT
Bromeliaceae	Guzmania	Guzmania testudinis	60471.6	132	38	9	19	2	LC or NT	LC or NT B1a+B2a	15.8	LC or NT	LC or NT
Bromeliaceae	Guzmania	Guzmania teucamae	NA	4	1	1	1	1	LC or NT	LC or NT B2a	100	CR	NA
Bromeliaceae	Guzmania	Guzmania teuscheri	52106.6	44	19	8	10	4	VU	VU B2a	26.3	VU	LC or NT
Bromeliaceae	Guzmania	Guzmania triangularis	6.06583e+06	364	124	34	56	20	LC or NT	LC or NT B1a+B2a	49.2	LC or NT	LC or NT
Bromeliaceae	Guzmania	Guzmania undulatobracteata	550780	40	20	7	7	3	VU	VU B2a	55	VU	LC or NT
Bromeliaceae	Guzmania	Guzmania van-volxemii	1.53846e+06	116	37	15	23	5	LC or NT	LC or NT B1a+B2a	29.7	LC or NT	LC or NT
Bromeliaceae	Guzmania	Guzmania variegata	174681	196	97	20	36	5	LC or NT	LC or NT B1a+B2a	7.2	LC or NT	LC or NT
Bromeliaceae	Guzmania	Guzmania ventricosa	8167	16	4	3	3	2	EN	EN B2a	75	EN	VU
Bromeliaceae	Guzmania	Guzmania verecunda	8	8	4	1	1	1	LC or NT	CR B1a	100	EN	CR
Bromeliaceae	Guzmania	Guzmania victoriae	10235.5	12	4	3	3	2	EN	EN B2a	75	EN	VU
Bromeliaceae	Guzmania	Guzmania vinacea	NA	8	2	2	2	1	EN	EN B2a	50	EN	NA
Bromeliaceae	Guzmania	Guzmania virescens	NA	4	1	1	1	0	CR	CR B2a	0	CR	NA
Bromeliaceae	Guzmania	Guzmania viridiflora	NA	4	1	1	1	1	LC or NT	LC or NT B2a	100	CR	NA
Bromeliaceae	Guzmania	Guzmania vittata	6.42583e+06	472	160	51	74	19	LC or NT	LC or NT B1a+B2a	41.2	LC or NT	LC or NT
Bromeliaceae	Guzmania	Guzmania weberbaueri	136953	60	25	7	9	1	VU	VU B2a	8	VU	LC or NT
Bromeliaceae	Guzmania	Guzmania wittmackii	1.26469e+06	140	37	16	28	4	LC or NT	LC or NT B1a+B2a	16.2	LC or NT	LC or NT
Bromeliaceae	Guzmania	Guzmania xanthobractea	29962.3	116	87	5	18	2	LC or NT	LC or NT B1a+B2a	2.3	LC or NT	LC or NT
Bromeliaceae	Guzmania	Guzmania xipholepis	124312	32	8	6	7	3	VU	VU B2a	50	VU	LC or NT
Bromeliaceae	Guzmania	Guzmania zahnii	988432	164	53	14	22	9	LC or NT	LC or NT B1a+B2a	49.1	LC or NT	LC or NT
Bromeliaceae	Guzmania	Guzmania zakii	2824.1	16	8	4	4	1	EN	EN B1a+B2a	25	EN	EN
Bromeliaceae	Hohenbergia	Hohenbergia andina	328.6	16	6	2	5	2	EN	EN B1a+B2a	33.3	EN	EN
Bromeliaceae	Hohenbergia	Hohenbergia antillana	NA	4	1	1	1	0	CR	CR B2a	0	CR	NA
Bromeliaceae	Hohenbergia	Hohenbergia augusta	2.27856e+06	316	112	44	65	8	LC or NT	LC or NT B1a+B2a	12.5	LC or NT	LC or NT
Bromeliaceae	Hohenbergia	Hohenbergia barbarespina	996.4	8	3	2	2	2	LC or NT	EN B1a+B2a	100	EN	EN
Bromeliaceae	Hohenbergia	Hohenbergia blanchetii	1268826	216	76	35	48	10	LC or NT	LC or NT B1a+B2a	22.4	LC or NT	LC or NT
Bromeliaceae	Hohenbergia	Hohenbergia burle-marxii	NA	8	2	2	2	0	EN	EN B2a	0	EN	NA
Bromeliaceae	Hohenbergia	Hohenbergia caatingae	3828432	884	420	98	184	17	LC or NT	LC or NT B1a+B2a	15.5	LC or NT	LC or NT
Bromeliaceae	Hohenbergia	Hohenbergia capitata	7768.4	48	16	7	10	4	VU	VU B1a+B2a	37.5	VU	VU
Bromeliaceae	Hohenbergia	Hohenbergia castellanosii	15087	40	13	6	8	3	VU	VU B1a+B2a	30.8	VU	VU
Bromeliaceae	Hohenbergia	Hohenbergia caymanensis	NA	4	1	1	1	1	LC or NT	LC or NT B2a	100	CR	NA
Bromeliaceae	Hohenbergia	Hohenbergia conquistensis	NA	8	2	2	2	0	EN	EN B2a	0	EN	NA
Bromeliaceae	Hohenbergia	Hohenbergia correia-arauji	14677	24	8	4	5	2	EN	EN B2a	62.5	EN	VU
Bromeliaceae	Hohenbergia	Hohenbergia distans	NA	4	1	1	1	0	CR	CR B2a	0	CR	NA
Bromeliaceae	Hohenbergia	Hohenbergia eriantha	68578.2	12	4	3	3	2	EN	EN B2a	75	EN	LC or NT
Bromeliaceae	Hohenbergia	Hohenbergia eriostachya	NA	4	1	1	1	1	LC or NT	LC or NT B2a	100	CR	NA
Bromeliaceae	Hohenbergia	Hohenbergia flava	1594.4	16	4	4	4	0	EN	EN B1a+B2a	0	EN	EN
Bromeliaceae	Hohenbergia	Hohenbergia humilis	33215.2	28	11	6	7	0	VU	VU B2a	0	VU	LC or NT
Bromeliaceae	Hohenbergia	Hohenbergia inermis	NA	4	1	1	1	0	CR	CR B2a	0	CR	NA
Bromeliaceae	Hohenbergia	Hohenbergia isepponae	NA	4	1	1	1	1	LC or NT	LC or NT B2a	100	CR	NA
Bromeliaceae	Hohenbergia	Hohenbergia lanata	4019.6	28	12	4	6	0	VU	VU B1a+B2a	0	VU	VU
Bromeliaceae	Hohenbergia	Hohenbergia lemei	NA	8	2	2	2	0	EN	EN B2a	0	EN	NA
Bromeliaceae	Hohenbergia	Hohenbergia littoralis	143136	40	23	7	9	2	VU	VU B2a	21.7	VU	LC or NT
Bromeliaceae	Hohenbergia	Hohenbergia loredanoana	NA	8	2	2	2	2	LC or NT	LC or NT B2a	100	EN	NA
Bromeliaceae	Hohenbergia	Hohenbergia membranostrobilus	340816	24	7	5	6	2	VU	VU B2a	42.9	VU	LC or NT
Bromeliaceae	Hohenbergia	Hohenbergia mutabilis	NA	4	2	1	1	1	LC or NT	LC or NT B2a	100	CR	NA
Bromeliaceae	Hohenbergia	Hohenbergia negrilensis	NA	4	1	1	1	0	CR	CR B2a	0	CR	NA
Bromeliaceae	Hohenbergia	Hohenbergia pabstii	1635.2	12	3	2	3	2	EN	EN B1a+B2a	66.7	EN	EN
Bromeliaceae	Hohenbergia	Hohenbergia penduliflora	NA	8	2	2	2	1	EN	EN B2a	50	EN	NA
Bromeliaceae	Hohenbergia	Hohenbergia portoricensis	1566.9	28	7	4	5	1	EN	EN B1a+B2a	28.6	EN	EN
Bromeliaceae	Hohenbergia	Hohenbergia ridleyi	2.33864e+06	528	222	64	110	18	LC or NT	LC or NT B1a+B2a	19.8	LC or NT	LC or NT
Bromeliaceae	Hohenbergia	Hohenbergia rosea	151455	20	5	4	5	0	EN	EN B2a	0	EN	LC or NT
Bromeliaceae	Hohenbergia	Hohenbergia salzmannii	1.52857e+06	104	35	19	22	5	LC or NT	LC or NT B1a+B2a	31.4	LC or NT	LC or NT
Bromeliaceae	Hohenbergia	Hohenbergia stellata	4.09038e+06	256	96	38	58	10	LC or NT	LC or NT B1a+B2a	16.7	LC or NT	LC or NT
Bromeliaceae	Hohenbergia	Hohenbergia undulatifolia	785.9	8	3	1	2	0	EN	EN B1a+B2a	0	EN	EN
Bromeliaceae	Hohenbergia	Hohenbergia vestita	222792	52	26	9	10	3	VU	VU B2a	34.6	VU	LC or NT
Bromeliaceae	Hohenbergiopsis	Hohenbergiopsis guatemalensis	35105.4	52	17	4	7	2	VU	VU B2a	11.8	VU	LC or NT
Bromeliaceae	Lymania	Lymania alvimii	16595.4	56	23	10	14	3	LC or NT	LC or NT B1a+B2a	34.8	LC or NT	LC or NT
Bromeliaceae	Lymania	Lymania azurea	10059.6	92	34	10	15	7	LC or NT	LC or NT B1a+B2a	64.7	LC or NT	LC or NT
Bromeliaceae	Lymania	Lymania brachycaulis	569749	36	10	6	8	3	VU	VU B2a	30	VU	LC or NT
Bromeliaceae	Lymania	Lymania corallina	47505.8	116	46	7	17	6	LC or NT	LC or NT B1a+B2a	63	LC or NT	LC or NT
Bromeliaceae	Lymania	Lymania globosa	2228.4	32	15	4	6	3	VU	VU B1a+B2a	46.7	VU	VU
Bromeliaceae	Lymania	Lymania languida	NA	4	2	1	1	1	LC or NT	LC or NT B2a	100	CR	NA
Bromeliaceae	Lymania	Lymania smithii	57287.9	208	91	15	30	5	LC or NT	LC or NT B1a+B2a	35.2	LC or NT	LC or NT
Bromeliaceae	Lymania	Lymania spiculata	26338.8	20	5	4	4	1	EN	EN B2a	20	EN	LC or NT
Bromeliaceae	Mezobromelia	Mezobromelia bicolor	94405.5	128	50	15	20	5	LC or NT	LC or NT B1a+B2a	34	LC or NT	LC or NT
Bromeliaceae	Mezobromelia	Mezobromelia capituligera	9.59393e+06	664	234	79	112	43	LC or NT	LC or NT B1a+B2a	49.1	LC or NT	LC or NT
Bromeliaceae	Mezobromelia	Mezobromelia fulgens	NA	8	2	2	2	1	EN	EN B2a	50	EN	NA
Bromeliaceae	Mezobromelia	Mezobromelia hospitalis	93.5	16	4	1	4	1	EN	EN B1a+B2a	25	EN	EN
Bromeliaceae	Mezobromelia	Mezobromelia hutchisonii	22161.9	16	6	3	4	0	EN	EN B2a	0	EN	LC or NT
Bromeliaceae	Mezobromelia	Mezobromelia magdalenae	NA	4	1	1	1	1	LC or NT	LC or NT B2a	100	CR	NA
Bromeliaceae	Navia	Navia connata	63922.4	16	6	3	3	1	EN	EN B2a	66.7	EN	LC or NT
Bromeliaceae	Navia	Navia jauana	3989.8	12	9	3	2	1	EN	EN B1a+B2a	88.9	EN	EN
Bromeliaceae	Navia	Navia phelpsiae	11300.7	24	12	5	5	3	EN	EN B2a	83.3	EN	VU
Bromeliaceae	Navia	Navia scirpiflora	3989.8	12	9	3	2	1	EN	EN B1a+B2a	88.9	EN	EN
Bromeliaceae	Neoregelia	Neoregelia abendrothae	1328.4	24	6	3	6	2	VU	VU B1a+B2a	33.3	VU	VU
Bromeliaceae	Neoregelia	Neoregelia ampullacea	152241	80	26	14	19	4	LC or NT	LC or NT B1a+B2a	15.4	LC or NT	LC or NT
Bromeliaceae	Neoregelia	Neoregelia angustibracteolata	NA	4	1	1	1	0	CR	CR B2a	0	CR	NA
Bromeliaceae	Neoregelia	Neoregelia angustifolia	NA	4	1	1	1	0	CR	CR B2a	0	CR	NA
Bromeliaceae	Neoregelia	Neoregelia azevedoi	1433.7	24	9	4	5	2	EN	EN B1a+B2a	55.6	EN	EN
Bromeliaceae	Neoregelia	Neoregelia binotii	22.9	8	3	2	2	0	EN	EN B1a+B2a	0	EN	EN
Bromeliaceae	Neoregelia	Neoregelia bragarum	5143	16	5	4	4	0	EN	EN B2a	0	EN	VU
Bromeliaceae	Neoregelia	Neoregelia brevifolia	NA	4	1	1	1	0	CR	CR B2a	0	CR	NA
Bromeliaceae	Neoregelia	Neoregelia brownii	32370.6	24	7	5	5	0	EN	EN B2a	0	EN	LC or NT
Bromeliaceae	Neoregelia	Neoregelia burlemarxii	59947.9	16	4	4	4	1	EN	EN B2a	25	EN	LC or NT
Bromeliaceae	Neoregelia	Neoregelia camorimiana	NA	8	2	2	2	0	EN	EN B2a	0	EN	NA
Bromeliaceae	Neoregelia	Neoregelia capixaba	NA	8	2	2	2	0	EN	EN B2a	0	EN	NA
Bromeliaceae	Neoregelia	Neoregelia carcharodon	427473	36	9	7	8	3	VU	VU B2a	33.3	VU	LC or NT
Bromeliaceae	Neoregelia	Neoregelia carinata	NA	8	2	1	2	1	EN	EN B2a	50	EN	NA
Bromeliaceae	Neoregelia	Neoregelia carolinae	86427.2	132	42	13	24	7	LC or NT	LC or NT B1a+B2a	45.2	LC or NT	LC or NT
Bromeliaceae	Neoregelia	Neoregelia chlorosticta	92720.5	60	15	12	14	3	LC or NT	LC or NT B1a+B2a	20	LC or NT	LC or NT
Bromeliaceae	Neoregelia	Neoregelia coimbrae	3562.2	16	6	4	4	0	EN	EN B1a+B2a	0	EN	EN
Bromeliaceae	Neoregelia	Neoregelia compacta	1.56433e+06	56	15	12	13	4	LC or NT	LC or NT B1a+B2a	33.3	LC or NT	LC or NT
Bromeliaceae	Neoregelia	Neoregelia concentrica	488774	112	61	15	24	6	LC or NT	LC or NT B1a+B2a	21.3	LC or NT	LC or NT
Bromeliaceae	Neoregelia	Neoregelia coriacea	8	8	3	2	2	0	EN	EN B1a+B2a	0	EN	EN
Bromeliaceae	Neoregelia	Neoregelia crispata	2094.6	28	9	4	6	2	VU	VU B1a+B2a	55.6	VU	VU
Bromeliaceae	Neoregelia	Neoregelia cruenta	1.23963e+06	156	53	24	33	5	LC or NT	LC or NT B1a+B2a	17	LC or NT	LC or NT
Bromeliaceae	Neoregelia	Neoregelia cyanea	24252	12	3	3	3	0	EN	EN B2a	0	EN	LC or NT
Bromeliaceae	Neoregelia	Neoregelia dactyloflammans	NA	8	2	2	2	0	EN	EN B2a	0	EN	NA
Bromeliaceae	Neoregelia	Neoregelia dayvidiana	NA	4	2	1	1	0	CR	CR B2a	0	CR	NA
Bromeliaceae	Neoregelia	Neoregelia doeringiana	11101.8	8	3	2	2	0	EN	EN B2a	0	EN	VU
Bromeliaceae	Neoregelia	Neoregelia dungsiana	14164.4	16	4	4	4	2	EN	EN B2a	50	EN	VU
Bromeliaceae	Neoregelia	Neoregelia eleutheropetala	7456065	496	186	62	82	22	LC or NT	LC or NT B1a+B2a	34.4	LC or NT	LC or NT
Bromeliaceae	Neoregelia	Neoregelia eltoniana	671	24	6	3	5	1	EN	EN B1a+B2a	16.7	EN	EN
Bromeliaceae	Neoregelia	Neoregelia farinosa	242545	112	33	19	27	5	LC or NT	LC or NT B1a+B2a	15.2	LC or NT	LC or NT
Bromeliaceae	Neoregelia	Neoregelia fluminensis	236.2	12	3	2	3	1	EN	EN B1a+B2a	33.3	EN	EN
Bromeliaceae	Neoregelia	Neoregelia fosteriana	68393	16	6	4	4	2	EN	EN B2a	33.3	EN	LC or NT
Bromeliaceae	Neoregelia	Neoregelia gavionensis	NA	8	2	2	2	1	EN	EN B2a	50	EN	NA
Bromeliaceae	Neoregelia	Neoregelia gigas	12	12	6	1	2	0	EN	EN B1a+B2a	0	EN	EN
Bromeliaceae	Neoregelia	Neoregelia guttata	140.2	28	13	1	5	1	EN	EN B1a+B2a	7.7	EN	EN
Bromeliaceae	Neoregelia	Neoregelia hoehneana	59407.5	40	11	8	9	3	VU	VU B2a	36.4	VU	LC or NT
Bromeliaceae	Neoregelia	Neoregelia ibitipocensis	6.07669e+06	336	121	31	48	14	LC or NT	LC or NT B1a+B2a	43	LC or NT	LC or NT
Bromeliaceae	Neoregelia	Neoregelia ilhana	NA	8	2	2	2	0	EN	EN B2a	0	EN	NA
Bromeliaceae	Neoregelia	Neoregelia indecora	3551.8	20	6	5	5	0	EN	EN B1a+B2a	0	EN	EN
Bromeliaceae	Neoregelia	Neoregelia inexspectata	NA	4	1	1	1	0	CR	CR B2a	0	CR	NA
Bromeliaceae	Neoregelia	Neoregelia johannis	161189	124	41	9	16	5	LC or NT	LC or NT B1a+B2a	61	LC or NT	LC or NT
Bromeliaceae	Neoregelia	Neoregelia johnsoniae	NA	4	1	1	1	0	CR	CR B2a	0	CR	NA
Bromeliaceae	Neoregelia	Neoregelia kautskyi	NA	4	2	1	1	0	CR	CR B2a	0	CR	NA
Bromeliaceae	Neoregelia	Neoregelia kerryae	29168.9	44	14	7	10	4	VU	VU B2a	50	VU	LC or NT
Bromeliaceae	Neoregelia	Neoregelia kuhlmannii	NA	4	2	1	1	0	CR	CR B2a	0	CR	NA
Bromeliaceae	Neoregelia	Neoregelia lactea	15.3	12	3	1	3	1	EN	EN B1a+B2a	33.3	EN	EN
Bromeliaceae	Neoregelia	Neoregelia laevis	6.69958e+06	504	166	51	77	24	LC or NT	LC or NT B1a+B2a	48.2	LC or NT	LC or NT
Bromeliaceae	Neoregelia	Neoregelia leprosa	23117.8	16	4	4	4	0	EN	EN B2a	0	EN	LC or NT
Bromeliaceae	Neoregelia	Neoregelia leucophoea	23421.9	24	6	5	6	4	VU	VU B2a	66.7	VU	LC or NT
Bromeliaceae	Neoregelia	Neoregelia leviana	500497	52	20	7	10	4	VU	VU B2a	30	VU	LC or NT
Bromeliaceae	Neoregelia	Neoregelia lilliputiana	258.1	12	3	3	3	0	EN	EN B1a+B2a	0	EN	EN
Bromeliaceae	Neoregelia	Neoregelia longisepala	3132.3	28	12	5	6	4	VU	VU B1a+B2a	58.3	VU	VU
Bromeliaceae	Neoregelia	Neoregelia lymaniana	23662.1	36	13	5	8	3	VU	VU B2a	46.2	VU	LC or NT
Bromeliaceae	Neoregelia	Neoregelia macahensis	57685.1	24	6	5	5	2	EN	EN B2a	50	EN	LC or NT
Bromeliaceae	Neoregelia	Neoregelia macrosepala	34530.4	140	56	9	26	6	LC or NT	LC or NT B1a+B2a	16.1	LC or NT	LC or NT
Bromeliaceae	Neoregelia	Neoregelia maculata	52523.4	12	3	3	3	0	EN	EN B2a	0	EN	LC or NT
Bromeliaceae	Neoregelia	Neoregelia magdalenae	661364	28	8	7	7	3	VU	VU B2a	37.5	VU	LC or NT
Bromeliaceae	Neoregelia	Neoregelia margaretae	NA	4	1	1	1	1	LC or NT	LC or NT B2a	100	CR	NA
Bromeliaceae	Neoregelia	Neoregelia marmorata	1.81423e+06	44	14	11	11	3	LC or NT	LC or NT B1a+B2a	35.7	LC or NT	LC or NT
Bromeliaceae	Neoregelia	Neoregelia martinellii	NA	8	2	2	2	0	EN	EN B2a	0	EN	NA
Bromeliaceae	Neoregelia	Neoregelia mcwilliamsii	12	12	3	1	3	1	EN	EN B1a+B2a	33.3	EN	EN
Bromeliaceae	Neoregelia	Neoregelia melanodonta	NA	4	1	1	1	0	CR	CR B2a	0	CR	NA
Bromeliaceae	Neoregelia	Neoregelia mooreana	187846	40	17	7	8	0	VU	VU B2a	0	VU	LC or NT
Bromeliaceae	Neoregelia	Neoregelia myrmecophila	2.25088e+06	76	40	19	19	3	LC or NT	LC or NT B1a+B2a	20	LC or NT	LC or NT
Bromeliaceae	Neoregelia	Neoregelia nevaresii	NA	4	1	1	1	0	CR	CR B2a	0	CR	NA
Bromeliaceae	Neoregelia	Neoregelia nivea	25457.3	12	3	3	3	1	EN	EN B2a	33.3	EN	LC or NT
Bromeliaceae	Neoregelia	Neoregelia odorata	101.7	12	3	2	3	1	EN	EN B1a+B2a	33.3	EN	EN
Bromeliaceae	Neoregelia	Neoregelia oligantha	21694.3	20	10	3	4	1	EN	EN B2a	30	EN	LC or NT
Bromeliaceae	Neoregelia	Neoregelia paratiensis	NA	4	2	1	2	2	LC or NT	LC or NT B2a	100	EN	NA
Bromeliaceae	Neoregelia	Neoregelia pascoaliana	133512	92	30	16	21	4	LC or NT	LC or NT B1a+B2a	30	LC or NT	LC or NT
Bromeliaceae	Neoregelia	Neoregelia pauciflora	40178.4	68	25	8	13	3	LC or NT	LC or NT B1a+B2a	20	LC or NT	LC or NT
Bromeliaceae	Neoregelia	Neoregelia paulistana	109754	16	4	4	4	0	EN	EN B2a	0	EN	LC or NT
Bromeliaceae	Neoregelia	Neoregelia pendula	1.25486e+06	68	35	11	15	0	LC or NT	LC or NT B1a+B2a	0	LC or NT	LC or NT
Bromeliaceae	Neoregelia	Neoregelia pernambucana	887.3	20	7	3	4	0	EN	EN B1a+B2a	0	EN	EN
Bromeliaceae	Neoregelia	Neoregelia petropolitana	995.1	16	4	3	3	1	EN	EN B1a+B2a	50	EN	EN
Bromeliaceae	Neoregelia	Neoregelia pineliana	83734.4	16	5	4	4	0	EN	EN B2a	0	EN	LC or NT
Bromeliaceae	Neoregelia	Neoregelia pontualii	13.1	8	3	2	2	0	EN	EN B1a+B2a	0	EN	EN
Bromeliaceae	Neoregelia	Neoregelia princeps	62610.9	24	6	6	6	1	VU	VU B2a	16.7	VU	LC or NT
Bromeliaceae	Neoregelia	Neoregelia punctatissima	210.2	12	3	2	2	1	EN	EN B1a+B2a	33.3	EN	EN
Bromeliaceae	Neoregelia	Neoregelia retrorsa	5366.5	8	5	2	2	0	EN	EN B2a	0	EN	VU
Bromeliaceae	Neoregelia	Neoregelia roethii	NA	4	1	1	1	0	CR	CR B2a	0	CR	NA
Bromeliaceae	Neoregelia	Neoregelia rosea	NA	4	2	1	1	0	CR	CR B2a	0	CR	NA
Bromeliaceae	Neoregelia	Neoregelia rothinessa	NA	4	1	1	1	1	LC or NT	LC or NT B2a	100	CR	NA
Bromeliaceae	Neoregelia	Neoregelia rubrifolia	NA	4	2	1	1	0	CR	CR B2a	0	CR	NA
Bromeliaceae	Neoregelia	Neoregelia rubrovittata	NA	4	2	1	1	0	CR	CR B2a	0	CR	NA
Bromeliaceae	Neoregelia	Neoregelia ruschii	121.5	12	5	2	2	1	EN	EN B1a+B2a	40	EN	EN
Bromeliaceae	Neoregelia	Neoregelia sanguinea	30710.7	12	3	3	3	0	EN	EN B2a	0	EN	LC or NT
Bromeliaceae	Neoregelia	Neoregelia sapiatibensis	3820.2	24	8	6	6	1	VU	VU B1a+B2a	25	VU	VU
Bromeliaceae	Neoregelia	Neoregelia sarmentosa	1.26851e+06	68	20	14	17	1	LC or NT	LC or NT B1a+B2a	5	LC or NT	LC or NT
Bromeliaceae	Neoregelia	Neoregelia seideliana	40.5	8	3	2	2	0	EN	EN B1a+B2a	0	EN	EN
Bromeliaceae	Neoregelia	Neoregelia silvimontana	NA	4	1	1	1	0	CR	CR B2a	0	CR	NA
Bromeliaceae	Neoregelia	Neoregelia simulans	20796.5	100	33	10	21	2	LC or NT	LC or NT B1a+B2a	9.1	LC or NT	LC or NT
Bromeliaceae	Neoregelia	Neoregelia smithii	NA	8	2	2	2	0	EN	EN B2a	0	EN	NA
Bromeliaceae	Neoregelia	Neoregelia spectabilis	295615	24	6	4	6	0	VU	VU B2a	0	VU	LC or NT
Bromeliaceae	Neoregelia	Neoregelia spiralipetala	NA	8	2	1	2	0	EN	EN B2a	0	EN	NA
Bromeliaceae	Neoregelia	Neoregelia stolonifera	690281	44	20	11	11	4	LC or NT	LC or NT B1a+B2a	35	LC or NT	LC or NT
Bromeliaceae	Neoregelia	Neoregelia tarapotoensis	1123.9	16	6	3	3	0	EN	EN B1a+B2a	0	EN	EN
Bromeliaceae	Neoregelia	Neoregelia tenebrosa	510.4	16	4	2	3	1	EN	EN B1a+B2a	25	EN	EN
Bromeliaceae	Neoregelia	Neoregelia tigrina	960.3	24	8	2	6	1	VU	VU B1a+B2a	12.5	VU	VU
Bromeliaceae	Neoregelia	Neoregelia tristis	425011	44	14	8	10	3	VU	VU B2a	28.6	VU	LC or NT
Bromeliaceae	Neoregelia	Neoregelia uleana	NA	4	1	1	1	0	CR	CR B2a	0	CR	NA
Bromeliaceae	Neoregelia	Neoregelia viridolineata	52	12	3	1	2	0	EN	EN B1a+B2a	0	EN	EN
Bromeliaceae	Neoregelia	Neoregelia viridovinosa	8	8	3	1	2	2	LC or NT	EN B1a+B2a	100	EN	EN
Bromeliaceae	Neoregelia	Neoregelia watersiana	NA	4	2	1	1	1	LC or NT	LC or NT B2a	100	CR	NA
Bromeliaceae	Neoregelia	Neoregelia wilsoniana	22612	76	35	9	14	5	LC or NT	LC or NT B1a+B2a	40	LC or NT	LC or NT
Bromeliaceae	Neoregelia	Neoregelia wurdackii	110450	24	7	6	6	1	VU	VU B2a	28.6	VU	LC or NT
Bromeliaceae	Neoregelia	Neoregelia zaslawskyi	NA	8	2	2	2	0	EN	EN B2a	0	EN	NA
Bromeliaceae	Neoregelia	Neoregelia zonata	111771	24	8	6	6	1	VU	VU B2a	37.5	VU	LC or NT
Bromeliaceae	Nidularium	Nidularium albiflorum	27103	24	7	4	6	1	VU	VU B2a	14.3	VU	LC or NT
Bromeliaceae	Nidularium	Nidularium alegrense	8	8	4	2	2	0	EN	EN B1a+B2a	0	EN	EN
Bromeliaceae	Nidularium	Nidularium alvimii	NA	8	2	2	2	0	EN	EN B2a	0	EN	NA
Bromeliaceae	Nidularium	Nidularium amazonicum	6.65691e+06	600	210	57	91	29	LC or NT	LC or NT B1a+B2a	49	LC or NT	LC or NT
Bromeliaceae	Nidularium	Nidularium amorimii	15824.6	60	25	4	10	6	VU	VU B1a+B2a	68	VU	VU
Bromeliaceae	Nidularium	Nidularium angustibracteatum	91968.4	100	31	16	18	4	LC or NT	LC or NT B1a+B2a	32.3	LC or NT	LC or NT
Bromeliaceae	Nidularium	Nidularium angustifolium	244927	28	7	7	6	3	VU	VU B2a	57.1	VU	LC or NT
Bromeliaceae	Nidularium	Nidularium antoineanum	129519	144	44	20	29	7	LC or NT	LC or NT B1a+B2a	38.6	LC or NT	LC or NT
Bromeliaceae	Nidularium	Nidularium apiculatum	234.4	12	5	2	3	0	EN	EN B1a+B2a	0	EN	EN
Bromeliaceae	Nidularium	Nidularium azureum	3024.2	12	4	3	3	0	EN	EN B1a+B2a	0	EN	EN
Bromeliaceae	Nidularium	Nidularium bicolor	145135	68	26	12	16	4	LC or NT	LC or NT B1a+B2a	42.3	LC or NT	LC or NT
Bromeliaceae	Nidularium	Nidularium billbergioides	1.74424e+06	488	167	44	88	20	LC or NT	LC or NT B1a+B2a	29.3	LC or NT	LC or NT
Bromeliaceae	Nidularium	Nidularium bocainense	195.6	16	4	2	4	2	EN	EN B1a+B2a	50	EN	EN
Bromeliaceae	Nidularium	Nidularium burchellii	24224	88	26	15	20	6	LC or NT	LC or NT B1a+B2a	30.8	LC or NT	LC or NT
Bromeliaceae	Nidularium	Nidularium campo-alegrensis	6.53632e+06	364	129	37	55	19	LC or NT	LC or NT B1a+B2a	49.6	LC or NT	LC or NT
Bromeliaceae	Nidularium	Nidularium campos-portoi	118620	24	6	5	6	0	VU	VU B2a	0	VU	LC or NT
Bromeliaceae	Nidularium	Nidularium cariacicaense	6513.2	144	75	6	24	3	LC or NT	LC or NT B1a+B2a	12	LC or NT	LC or NT
Bromeliaceae	Nidularium	Nidularium catarinense	14712.6	12	5	3	3	0	EN	EN B2a	0	EN	VU
Bromeliaceae	Nidularium	Nidularium corallinum	29011.1	20	5	3	5	2	EN	EN B2a	40	EN	LC or NT
Bromeliaceae	Nidularium	Nidularium correia-araujoi	NA	8	2	2	2	0	EN	EN B2a	0	EN	NA
Bromeliaceae	Nidularium	Nidularium exiguum	13763.5	36	13	6	8	1	VU	VU B1a+B2a	30.8	VU	VU
Bromeliaceae	Nidularium	Nidularium ferdinando-coburgii	6.10159e+06	376	136	30	54	16	LC or NT	LC or NT B1a+B2a	41.9	LC or NT	LC or NT
Bromeliaceae	Nidularium	Nidularium ferrugineum	NA	4	2	1	1	0	CR	CR B2a	0	CR	NA
Bromeliaceae	Nidularium	Nidularium fulgens	208467	76	27	9	16	4	LC or NT	LC or NT B1a+B2a	25.9	LC or NT	LC or NT
Bromeliaceae	Nidularium	Nidularium innocentii	10051846	1804	759	103	296	66	LC or NT	LC or NT B1a+B2a	43.2	LC or NT	LC or NT
Bromeliaceae	Nidularium	Nidularium itatiaiae	81919	40	14	3	6	3	VU	VU B2a	57.1	VU	LC or NT
Bromeliaceae	Nidularium	Nidularium kautskyanum	682.8	20	10	2	5	1	EN	EN B1a+B2a	30	EN	EN
Bromeliaceae	Nidularium	Nidularium lymanioides	13327.8	52	19	6	9	1	VU	VU B1a+B2a	15.8	VU	VU
Bromeliaceae	Nidularium	Nidularium mangaratibense	NA	8	2	2	2	0	EN	EN B2a	0	EN	NA
Bromeliaceae	Nidularium	Nidularium marigoi	41097.4	92	37	11	15	4	LC or NT	LC or NT B1a+B2a	56.8	LC or NT	LC or NT
Bromeliaceae	Nidularium	Nidularium microps	1.48306e+06	192	66	23	34	13	LC or NT	LC or NT B1a+B2a	47	LC or NT	LC or NT
Bromeliaceae	Nidularium	Nidularium organense	NA	4	2	1	1	0	CR	CR B2a	0	CR	NA
Bromeliaceae	Nidularium	Nidularium picinguabensis	2561.5	16	5	4	4	1	EN	EN B1a+B2a	20	EN	EN
Bromeliaceae	Nidularium	Nidularium procerum	9.52659e+06	1268	459	109	219	53	LC or NT	LC or NT B1a+B2a	36.4	LC or NT	LC or NT
Bromeliaceae	Nidularium	Nidularium pulcherrimum	NA	4	1	1	1	0	CR	CR B2a	0	CR	NA
Bromeliaceae	Nidularium	Nidularium purpureum	678133	60	16	14	15	2	LC or NT	LC or NT B1a+B2a	12.5	LC or NT	LC or NT
Bromeliaceae	Nidularium	Nidularium rolfianum	NA	8	2	1	2	1	EN	EN B2a	50	EN	NA
Bromeliaceae	Nidularium	Nidularium rutilans	1.1109e+06	160	44	30	35	9	LC or NT	LC or NT B1a+B2a	29.5	LC or NT	LC or NT
Bromeliaceae	Nidularium	Nidularium scheremetiewii	1.38106e+06	156	47	33	34	10	LC or NT	LC or NT B1a+B2a	34	LC or NT	LC or NT
Bromeliaceae	Nidularium	Nidularium seidelii	17707.4	40	11	6	9	5	VU	VU B1a+B2a	63.6	VU	VU
Bromeliaceae	Nidularium	Nidularium utriculosum	360082	24	6	5	5	2	EN	EN B2a	33.3	EN	LC or NT
Bromeliaceae	Nidularium	Nidularium viridipetalum	NA	4	2	1	2	1	EN	EN B2a	50	EN	NA
Bromeliaceae	Orthophytum	Orthophytum graomogolense	43.4	16	7	2	3	1	EN	EN B1a+B2a	71.4	EN	EN
Bromeliaceae	Orthophytum	Orthophytum piranianum	1120.5	24	18	3	4	0	EN	EN B1a+B2a	0	EN	EN
Bromeliaceae	Orthophytum	Orthophytum striatifolium	4	4	3	1	1	0	CR	CR B1a	0	EN	CR
Bromeliaceae	Pitcairnia	Pitcairnia alata	1649.5	32	10	3	4	0	EN	EN B1a+B2a	0	EN	EN
Bromeliaceae	Pitcairnia	Pitcairnia andreetae	NA	8	2	2	2	0	EN	EN B2a	0	EN	NA
Bromeliaceae	Pitcairnia	Pitcairnia arcuata	6265187	984	379	77	154	43	LC or NT	LC or NT B1a+B2a	39.8	LC or NT	LC or NT
Bromeliaceae	Pitcairnia	Pitcairnia atrorubens	261307	512	179	35	83	28	LC or NT	LC or NT B1a+B2a	53.6	LC or NT	LC or NT
Bromeliaceae	Pitcairnia	Pitcairnia bakeri	80656.3	192	77	20	33	3	LC or NT	LC or NT B1a+B2a	7.8	LC or NT	LC or NT
Bromeliaceae	Pitcairnia	Pitcairnia brittoniana	9.11538e+06	724	272	67	105	36	LC or NT	LC or NT B1a+B2a	51.8	LC or NT	LC or NT
Bromeliaceae	Pitcairnia	Pitcairnia brongniartiana	70746.1	68	20	5	11	3	LC or NT	LC or NT B1a+B2a	25	LC or NT	LC or NT
Bromeliaceae	Pitcairnia	Pitcairnia brunnescens	219333	52	20	10	13	2	LC or NT	LC or NT B1a+B2a	15	LC or NT	LC or NT
Bromeliaceae	Pitcairnia	Pitcairnia caricifolia	5.19755e+06	428	166	75	71	32	LC or NT	LC or NT B1a+B2a	65.7	LC or NT	LC or NT
Bromeliaceae	Pitcairnia	Pitcairnia carioana	NA	8	2	2	2	0	EN	EN B2a	0	EN	NA
Bromeliaceae	Pitcairnia	Pitcairnia clarkei	77.3	16	6	2	2	1	EN	EN B1a+B2a	83.3	EN	EN
Bromeliaceae	Pitcairnia	Pitcairnia commixta	163960	80	20	8	17	5	LC or NT	LC or NT B1a+B2a	25	LC or NT	LC or NT
Bromeliaceae	Pitcairnia	Pitcairnia cosangaensis	14063.8	52	24	5	9	2	VU	VU B1a+B2a	16.7	VU	VU
Bromeliaceae	Pitcairnia	Pitcairnia diffusa	66192.7	24	8	5	5	3	EN	EN B2a	62.5	EN	LC or NT
Bromeliaceae	Pitcairnia	Pitcairnia elongata	918254	48	19	9	11	2	LC or NT	LC or NT B1a+B2a	36.8	LC or NT	LC or NT
Bromeliaceae	Pitcairnia	Pitcairnia epiphytica	16109.2	12	4	3	3	3	LC or NT	EN B2a	100	EN	VU
Bromeliaceae	Pitcairnia	Pitcairnia foreroi	NA	4	1	1	1	0	CR	CR B2a	0	CR	NA
Bromeliaceae	Pitcairnia	Pitcairnia fusca	64232.2	116	64	9	18	2	LC or NT	LC or NT B1a+B2a	3.1	LC or NT	LC or NT
Bromeliaceae	Pitcairnia	Pitcairnia heterophylla	8756273	1372	463	122	235	69	LC or NT	LC or NT B1a+B2a	40.6	LC or NT	LC or NT
Bromeliaceae	Pitcairnia	Pitcairnia hirtzii	7422	48	28	6	9	0	VU	VU B1a+B2a	0	VU	VU
Bromeliaceae	Pitcairnia	Pitcairnia imbricata	708818	540	169	69	94	36	LC or NT	LC or NT B1a+B2a	52.1	LC or NT	LC or NT
Bromeliaceae	Pitcairnia	Pitcairnia lymansmithiana	18493.5	24	8	4	5	3	EN	EN B2a	75	EN	VU
Bromeliaceae	Pitcairnia	Pitcairnia macranthera	104477	76	24	13	18	4	LC or NT	LC or NT B1a+B2a	16.7	LC or NT	LC or NT
Bromeliaceae	Pitcairnia	Pitcairnia mucida	1731.9	12	3	3	3	1	EN	EN B1a+B2a	33.3	EN	EN
Bromeliaceae	Pitcairnia	Pitcairnia multiflora	20249	52	19	4	6	4	VU	VU B2a	89.5	VU	LC or NT
Bromeliaceae	Pitcairnia	Pitcairnia nigra	173960	248	120	16	38	5	LC or NT	LC or NT B1a+B2a	10.8	LC or NT	LC or NT
Bromeliaceae	Pitcairnia	Pitcairnia palmeri	138908	68	28	10	15	4	LC or NT	LC or NT B1a+B2a	17.9	LC or NT	LC or NT
Bromeliaceae	Pitcairnia	Pitcairnia palmoides	84979.1	44	17	9	11	2	LC or NT	LC or NT B1a+B2a	23.5	LC or NT	LC or NT
Bromeliaceae	Pitcairnia	Pitcairnia prolifera	6.22957e+06	324	112	28	46	15	LC or NT	LC or NT B1a+B2a	47.3	LC or NT	LC or NT
Bromeliaceae	Pitcairnia	Pitcairnia ramosii	NA	4	1	1	1	0	CR	CR B2a	0	CR	NA
Bromeliaceae	Pitcairnia	Pitcairnia rubiginosa	3.03905e+06	88	29	19	20	6	LC or NT	LC or NT B1a+B2a	24.1	LC or NT	LC or NT
Bromeliaceae	Pitcairnia	Pitcairnia semijuncta	NA	8	2	2	2	0	EN	EN B2a	0	EN	NA
Bromeliaceae	Pitcairnia	Pitcairnia sodiroi	16888.4	128	45	7	16	3	LC or NT	LC or NT B1a+B2a	6.7	LC or NT	LC or NT
Bromeliaceae	Pitcairnia	Pitcairnia spectabilis	34007.7	88	25	6	14	3	LC or NT	LC or NT B1a+B2a	28	LC or NT	LC or NT
Bromeliaceae	Pitcairnia	Pitcairnia squarrosa	9978.1	20	6	3	5	1	EN	EN B2a	16.7	EN	VU
Bromeliaceae	Pitcairnia	Pitcairnia stevensonii	11426.3	24	7	5	5	0	EN	EN B2a	0	EN	VU
Bromeliaceae	Pitcairnia	Pitcairnia trianae	1.37698e+06	168	62	20	27	8	LC or NT	LC or NT B1a+B2a	24.2	LC or NT	LC or NT
Bromeliaceae	Pitcairnia	Pitcairnia uaupensis	2.64658e+06	204	78	36	36	12	LC or NT	LC or NT B1a+B2a	35.9	LC or NT	LC or NT
Bromeliaceae	Pitcairnia	Pitcairnia wendlandii	263877	164	55	17	24	12	LC or NT	LC or NT B1a+B2a	67.3	LC or NT	LC or NT
Bromeliaceae	Portea	Portea alatisepala	25122.2	104	35	16	21	9	LC or NT	LC or NT B1a+B2a	45.7	LC or NT	LC or NT
Bromeliaceae	Portea	Portea grandiflora	128987	92	48	11	13	7	LC or NT	LC or NT B1a+B2a	70.8	LC or NT	LC or NT
Bromeliaceae	Quesnelia	Quesnelia arvensis	1.44966e+06	228	75	32	44	11	LC or NT	LC or NT B1a+B2a	34.7	LC or NT	LC or NT
Bromeliaceae	Quesnelia	Quesnelia augusto-coburgii	24435.1	60	15	8	12	4	LC or NT	LC or NT B1a+B2a	40	LC or NT	LC or NT
Bromeliaceae	Quesnelia	Quesnelia blanda	334049	36	9	9	9	3	VU	VU B2a	33.3	VU	LC or NT
Bromeliaceae	Quesnelia	Quesnelia clavata	1183.9	24	8	3	4	2	EN	EN B1a+B2a	75	EN	EN
Bromeliaceae	Quesnelia	Quesnelia conquistensis	NA	4	1	1	1	0	CR	CR B2a	0	CR	NA
Bromeliaceae	Quesnelia	Quesnelia dubia	NA	4	1	1	1	0	CR	CR B2a	0	CR	NA
Bromeliaceae	Quesnelia	Quesnelia edmundoi	41962	88	57	11	18	3	LC or NT	LC or NT B1a+B2a	8.8	LC or NT	LC or NT
Bromeliaceae	Quesnelia	Quesnelia humilis	1.30155e+06	140	48	21	27	6	LC or NT	LC or NT B1a+B2a	25	LC or NT	LC or NT
Bromeliaceae	Quesnelia	Quesnelia imbricata	36928.7	112	34	15	20	3	LC or NT	LC or NT B1a+B2a	23.5	LC or NT	LC or NT
Bromeliaceae	Quesnelia	Quesnelia kautskyi	59823.8	132	52	10	26	2	LC or NT	LC or NT B1a+B2a	26.9	LC or NT	LC or NT
Bromeliaceae	Quesnelia	Quesnelia koltesii	1127.5	16	10	3	4	2	EN	EN B1a+B2a	20	EN	EN
Bromeliaceae	Quesnelia	Quesnelia lateralis	336569	92	32	8	16	7	LC or NT	LC or NT B1a+B2a	62.5	LC or NT	LC or NT
Bromeliaceae	Quesnelia	Quesnelia liboniana	173423	140	44	9	21	7	LC or NT	LC or NT B1a+B2a	52.3	LC or NT	LC or NT
Bromeliaceae	Quesnelia	Quesnelia marmorata	940725	100	28	19	23	5	LC or NT	LC or NT B1a+B2a	21.4	LC or NT	LC or NT
Bromeliaceae	Quesnelia	Quesnelia quesneliana	117339	340	118	35	75	15	LC or NT	LC or NT B1a+B2a	16.9	LC or NT	LC or NT
Bromeliaceae	Quesnelia	Quesnelia testudo	1.91276e+06	116	35	19	21	7	LC or NT	LC or NT B1a+B2a	45.7	LC or NT	LC or NT
Bromeliaceae	Quesnelia	Quesnelia tubifolia	NA	4	2	1	1	1	LC or NT	LC or NT B2a	100	CR	NA
Bromeliaceae	Quesnelia	Quesnelia violacea	9081.6	48	14	9	8	2	VU	VU B1a+B2a	50	VU	VU
Bromeliaceae	Racinaea	Racinaea condorensis	NA	4	2	1	1	0	CR	CR B2a	0	CR	NA
Bromeliaceae	Racinaea	Racinaea euryelytra	23934.8	32	11	6	7	4	VU	VU B2a	54.5	VU	LC or NT
Bromeliaceae	Racinaea	Racinaea gentryana	NA	4	2	1	1	0	CR	CR B2a	0	CR	NA
Bromeliaceae	Racinaea	Racinaea goudae	2102.6	24	9	4	4	3	EN	EN B1a+B2a	88.9	EN	EN
Bromeliaceae	Racinaea	Racinaea grantii	NA	4	1	1	1	0	CR	CR B2a	0	CR	NA
Bromeliaceae	Racinaea	Racinaea guacamayosensis	4	4	3	1	1	1	LC or NT	CR B1a	100	EN	CR
Bromeliaceae	Racinaea	Racinaea kalliantha	NA	4	1	1	1	0	CR	CR B2a	0	CR	NA
Bromeliaceae	Racinaea	Racinaea lymansmithiana	NA	4	1	1	1	0	CR	CR B2a	0	CR	NA
Bromeliaceae	Racinaea	Racinaea marioportillae	NA	4	1	1	1	0	CR	CR B2a	0	CR	NA
Bromeliaceae	Racinaea	Racinaea pattersoniae	NA	4	2	1	2	1	EN	EN B2a	50	EN	NA
Bromeliaceae	Racinaea	Racinaea penduliflora	24850.8	36	18	6	5	2	EN	EN B2a	72.2	EN	LC or NT
Bromeliaceae	Racinaea	Racinaea tillii	8	8	3	1	1	1	LC or NT	CR B1a	100	EN	CR
Bromeliaceae	Ronnbergia	Ronnbergia aciculosa	1.36173e+06	104	28	14	21	2	LC or NT	LC or NT B1a+B2a	21.4	LC or NT	LC or NT
Bromeliaceae	Ronnbergia	Ronnbergia allenii	14198.4	128	52	9	16	7	LC or NT	LC or NT B1a+B2a	50	LC or NT	LC or NT
Bromeliaceae	Ronnbergia	Ronnbergia campanulata	637.8	20	5	2	3	0	EN	EN B1a+B2a	0	EN	EN
Bromeliaceae	Ronnbergia	Ronnbergia carvalhoi	4041.3	16	4	4	4	4	LC or NT	EN B1a+B2a	100	EN	EN
Bromeliaceae	Ronnbergia	Ronnbergia columbiana	68437.2	16	4	3	4	0	EN	EN B2a	0	EN	LC or NT
Bromeliaceae	Ronnbergia	Ronnbergia deleonii	103470	120	47	16	24	4	LC or NT	LC or NT B1a+B2a	10.6	LC or NT	LC or NT
Bromeliaceae	Ronnbergia	Ronnbergia drakeana	24541.6	76	40	10	14	0	LC or NT	LC or NT B1a+B2a	0	LC or NT	LC or NT
Bromeliaceae	Ronnbergia	Ronnbergia explodens	578361	184	63	19	26	11	LC or NT	LC or NT B1a+B2a	54	LC or NT	LC or NT
Bromeliaceae	Ronnbergia	Ronnbergia fraseri	1.05026e+06	20	5	5	5	1	EN	EN B2a	20	EN	LC or NT
Bromeliaceae	Ronnbergia	Ronnbergia germinyana	39224.2	88	25	7	15	3	LC or NT	LC or NT B1a+B2a	16	LC or NT	LC or NT
Bromeliaceae	Ronnbergia	Ronnbergia hathewayi	90827.9	148	59	12	19	9	LC or NT	LC or NT B1a+B2a	72.9	LC or NT	LC or NT
Bromeliaceae	Ronnbergia	Ronnbergia involucrata	7412.2	16	4	4	4	0	EN	EN B2a	0	EN	VU
Bromeliaceae	Ronnbergia	Ronnbergia killipiana	6911.3	12	3	3	3	1	EN	EN B2a	33.3	EN	VU
Bromeliaceae	Ronnbergia	Ronnbergia maidifolia	405922	48	12	7	9	5	VU	VU B2a	66.7	VU	LC or NT
Bromeliaceae	Ronnbergia	Ronnbergia morreniana	831776	52	17	6	9	2	VU	VU B2a	47.1	VU	LC or NT
Bromeliaceae	Ronnbergia	Ronnbergia neoregelioides	2094.9	20	5	3	3	2	EN	EN B1a+B2a	60	EN	EN
Bromeliaceae	Ronnbergia	Ronnbergia silvana	2622.9	24	7	3	4	1	EN	EN B1a+B2a	42.9	EN	EN
Bromeliaceae	Ronnbergia	Ronnbergia subpetiolata	NA	4	1	1	1	0	CR	CR B2a	0	CR	NA
Bromeliaceae	Ronnbergia	Ronnbergia tonduzii	234400	276	87	23	36	14	LC or NT	LC or NT B1a+B2a	57.5	LC or NT	LC or NT
Bromeliaceae	Ronnbergia	Ronnbergia veitchii	956992	544	213	45	76	21	LC or NT	LC or NT B1a+B2a	46.9	LC or NT	LC or NT
Bromeliaceae	Ronnbergia	Ronnbergia viridispica	NA	4	1	1	1	0	CR	CR B2a	0	CR	NA
Bromeliaceae	Ronnbergia	Ronnbergia wuelfinghoffii	NA	4	2	1	1	0	CR	CR B2a	0	CR	NA
Bromeliaceae	Tillandsia	Tillandsia achyrostachys	458075	544	204	46	75	10	LC or NT	LC or NT B1a+B2a	42.6	LC or NT	LC or NT
Bromeliaceae	Tillandsia	Tillandsia acosta-solisii	NA	4	2	1	1	1	LC or NT	LC or NT B2a	100	CR	NA
Bromeliaceae	Tillandsia	Tillandsia acuminata	NA	8	2	2	2	0	EN	EN B2a	0	EN	NA
Bromeliaceae	Tillandsia	Tillandsia adamsii	NA	4	1	1	1	0	CR	CR B2a	0	CR	NA
Bromeliaceae	Tillandsia	Tillandsia adpressa	1.80657e+06	296	112	42	57	17	LC or NT	LC or NT B1a+B2a	30.4	LC or NT	LC or NT
Bromeliaceae	Tillandsia	Tillandsia adpressiflora	6.79359e+06	448	188	81	79	26	LC or NT	LC or NT B1a+B2a	44.1	LC or NT	LC or NT
Bromeliaceae	Tillandsia	Tillandsia aequatorialis	18627.9	28	8	4	5	3	EN	EN B2a	62.5	EN	VU
Bromeliaceae	Tillandsia	Tillandsia aeranthos	1.05246e+07	1124	373	134	217	40	LC or NT	LC or NT B1a+B2a	27.6	LC or NT	LC or NT
Bromeliaceae	Tillandsia	Tillandsia aerisincola	1.61594e+06	216	79	36	48	12	LC or NT	LC or NT B1a+B2a	26.6	LC or NT	LC or NT
Bromeliaceae	Tillandsia	Tillandsia afonsoana	NA	4	2	1	1	0	CR	CR B2a	0	CR	NA
Bromeliaceae	Tillandsia	Tillandsia aizoides	437223	64	19	15	16	3	LC or NT	LC or NT B1a+B2a	15.8	LC or NT	LC or NT
Bromeliaceae	Tillandsia	Tillandsia albertiana	NA	8	2	2	2	0	EN	EN B2a	0	EN	NA
Bromeliaceae	Tillandsia	Tillandsia albida	40	8	6	2	2	1	EN	EN B1a+B2a	66.7	EN	EN
Bromeliaceae	Tillandsia	Tillandsia alvareziae	2342.4	12	3	3	3	0	EN	EN B1a+B2a	0	EN	EN
Bromeliaceae	Tillandsia	Tillandsia anceps	1.20933e+07	928	299	110	152	60	LC or NT	LC or NT B1a+B2a	52.2	LC or NT	LC or NT
Bromeliaceae	Tillandsia	Tillandsia andicola	28899.5	24	6	6	6	1	VU	VU B2a	16.7	VU	LC or NT
Bromeliaceae	Tillandsia	Tillandsia andreana	205096	12	5	3	3	1	EN	EN B2a	60	EN	LC or NT
Bromeliaceae	Tillandsia	Tillandsia andrieuxii	155418	92	35	11	19	8	LC or NT	LC or NT B1a+B2a	48.6	LC or NT	LC or NT
Bromeliaceae	Tillandsia	Tillandsia angulosa	NA	8	2	2	2	0	EN	EN B2a	0	EN	NA
Bromeliaceae	Tillandsia	Tillandsia antillana	NA	4	1	1	1	1	LC or NT	LC or NT B2a	100	CR	NA
Bromeliaceae	Tillandsia	Tillandsia appenii	141918	32	10	6	7	0	VU	VU B2a	0	VU	LC or NT
Bromeliaceae	Tillandsia	Tillandsia araujei	970952	52	18	9	13	3	LC or NT	LC or NT B1a+B2a	27.8	LC or NT	LC or NT
Bromeliaceae	Tillandsia	Tillandsia arenicola	NA	4	1	1	1	0	CR	CR B2a	0	CR	NA
Bromeliaceae	Tillandsia	Tillandsia arequitae	64979.4	12	3	3	3	0	EN	EN B2a	0	EN	LC or NT
Bromeliaceae	Tillandsia	Tillandsia argentea	8.61949e+06	352	120	32	50	16	LC or NT	LC or NT B1a+B2a	46.7	LC or NT	LC or NT
Bromeliaceae	Tillandsia	Tillandsia argentina	730.8	12	3	3	3	0	EN	EN B1a+B2a	0	EN	EN
Bromeliaceae	Tillandsia	Tillandsia arizajuliae	NA	8	2	2	2	1	EN	EN B2a	50	EN	NA
Bromeliaceae	Tillandsia	Tillandsia atroviolacea	NA	4	1	1	1	0	CR	CR B2a	0	CR	NA
Bromeliaceae	Tillandsia	Tillandsia atroviridipetala	126494	212	68	28	33	7	LC or NT	LC or NT B1a+B2a	42.6	LC or NT	LC or NT
Bromeliaceae	Tillandsia	Tillandsia aurea	NA	8	2	2	2	0	EN	EN B2a	0	EN	NA
Bromeliaceae	Tillandsia	Tillandsia australis	472012	80	29	15	14	2	LC or NT	LC or NT B1a+B2a	44.8	LC or NT	LC or NT
Bromeliaceae	Tillandsia	Tillandsia baileyi	295078	32	9	6	8	2	VU	VU B2a	22.2	VU	LC or NT
Bromeliaceae	Tillandsia	Tillandsia bakeri	1.2596e+06	32	10	7	7	3	VU	VU B2a	30	VU	LC or NT
Bromeliaceae	Tillandsia	Tillandsia balbisiana	1.04916e+07	1908	619	237	358	96	LC or NT	LC or NT B1a+B2a	37.3	LC or NT	LC or NT
Bromeliaceae	Tillandsia	Tillandsia baliophylla	19740.9	56	17	10	11	1	LC or NT	LC or NT B1a+B2a	11.8	LC or NT	LC or NT
Bromeliaceae	Tillandsia	Tillandsia balsasensis	NA	4	1	1	1	0	CR	CR B2a	0	CR	NA
Bromeliaceae	Tillandsia	Tillandsia bandensis	1.61673e+06	112	36	22	27	3	LC or NT	LC or NT B1a+B2a	16.7	LC or NT	LC or NT
Bromeliaceae	Tillandsia	Tillandsia barbeyana	6.06967e+06	368	130	32	52	15	LC or NT	LC or NT B1a+B2a	41.5	LC or NT	LC or NT
Bromeliaceae	Tillandsia	Tillandsia barclayana	1.24337e+06	52	13	11	12	0	LC or NT	LC or NT B1a+B2a	0	LC or NT	LC or NT
Bromeliaceae	Tillandsia	Tillandsia barfussii	NA	4	1	1	1	0	CR	CR B2a	0	CR	NA
Bromeliaceae	Tillandsia	Tillandsia barrosoae	102566	24	9	5	6	2	VU	VU B2a	44.4	VU	LC or NT
Bromeliaceae	Tillandsia	Tillandsia barthlottii	17176.9	36	15	6	8	0	VU	VU B1a+B2a	0	VU	VU
Bromeliaceae	Tillandsia	Tillandsia bartramii	271700	224	92	15	19	6	LC or NT	LC or NT B1a+B2a	78.3	LC or NT	LC or NT
Bromeliaceae	Tillandsia	Tillandsia bella	NA	8	2	2	2	1	EN	EN B2a	50	EN	NA
Bromeliaceae	Tillandsia	Tillandsia belloensis	43528	48	13	6	8	2	VU	VU B2a	15.4	VU	LC or NT
Bromeliaceae	Tillandsia	Tillandsia bergeri	93248.1	20	5	5	5	0	EN	EN B2a	0	EN	LC or NT
Bromeliaceae	Tillandsia	Tillandsia bermejoensis	NA	4	2	1	1	0	CR	CR B2a	0	CR	NA
Bromeliaceae	Tillandsia	Tillandsia biflora	9.41607e+06	804	291	84	136	44	LC or NT	LC or NT B1a+B2a	44.7	LC or NT	LC or NT
Bromeliaceae	Tillandsia	Tillandsia bismarckii	NA	4	1	1	1	0	CR	CR B2a	0	CR	NA
Bromeliaceae	Tillandsia	Tillandsia blassii	NA	8	2	2	2	0	EN	EN B2a	0	EN	NA
Bromeliaceae	Tillandsia	Tillandsia bochilensis	31954.7	20	5	5	5	1	EN	EN B2a	20	EN	LC or NT
Bromeliaceae	Tillandsia	Tillandsia boliviana	35791.7	20	6	5	5	0	EN	EN B2a	0	EN	LC or NT
Bromeliaceae	Tillandsia	Tillandsia bongarana	6.06583e+06	328	116	29	48	16	LC or NT	LC or NT B1a+B2a	47.4	LC or NT	LC or NT
Bromeliaceae	Tillandsia	Tillandsia boqueronensis	NA	4	1	1	1	1	LC or NT	LC or NT B2a	100	CR	NA
Bromeliaceae	Tillandsia	Tillandsia borealis	NA	4	2	1	2	1	EN	EN B2a	50	EN	NA
Bromeliaceae	Tillandsia	Tillandsia borinquensis	NA	4	1	1	1	0	CR	CR B2a	0	CR	NA
Bromeliaceae	Tillandsia	Tillandsia botterii	6.06583e+06	356	124	29	52	15	LC or NT	LC or NT B1a+B2a	42.7	LC or NT	LC or NT
Bromeliaceae	Tillandsia	Tillandsia bourgaei	377447	340	106	47	61	7	LC or NT	LC or NT B1a+B2a	21.7	LC or NT	LC or NT
Bromeliaceae	Tillandsia	Tillandsia brachycaulos	8.81564e+06	1356	431	131	226	53	LC or NT	LC or NT B1a+B2a	34.8	LC or NT	LC or NT
Bromeliaceae	Tillandsia	Tillandsia brealitoensis	NA	4	1	1	1	0	CR	CR B2a	0	CR	NA
Bromeliaceae	Tillandsia	Tillandsia brenneri	NA	4	2	1	1	0	CR	CR B2a	0	CR	NA
Bromeliaceae	Tillandsia	Tillandsia brevilingua	85410.3	20	7	4	4	1	EN	EN B2a	28.6	EN	LC or NT
Bromeliaceae	Tillandsia	Tillandsia brevior	NA	4	1	1	1	0	CR	CR B2a	0	CR	NA
Bromeliaceae	Tillandsia	Tillandsia breviturneri	NA	8	2	2	2	1	EN	EN B2a	50	EN	NA
Bromeliaceae	Tillandsia	Tillandsia bryoides	4.44454e+06	268	82	61	60	11	LC or NT	LC or NT B1a+B2a	20.7	LC or NT	LC or NT
Bromeliaceae	Tillandsia	Tillandsia buchlohii	NA	8	2	2	2	0	EN	EN B2a	0	EN	NA
Bromeliaceae	Tillandsia	Tillandsia bulbosa	13083820	2884	1073	363	511	134	LC or NT	LC or NT B1a+B2a	37.7	LC or NT	LC or NT
Bromeliaceae	Tillandsia	Tillandsia buseri	1.43028e+06	188	66	28	39	9	LC or NT	LC or NT B1a+B2a	25.8	LC or NT	LC or NT
Bromeliaceae	Tillandsia	Tillandsia butzii	9.67431e+06	1268	478	88	193	52	LC or NT	LC or NT B1a+B2a	37.4	LC or NT	LC or NT
Bromeliaceae	Tillandsia	Tillandsia caballosensis	NA	4	1	1	1	0	CR	CR B2a	0	CR	NA
Bromeliaceae	Tillandsia	Tillandsia cacticola	49428.6	20	5	5	5	0	EN	EN B2a	0	EN	LC or NT
Bromeliaceae	Tillandsia	Tillandsia caerulea	6.289e+06	356	123	32	50	14	LC or NT	LC or NT B1a+B2a	42.3	LC or NT	LC or NT
Bromeliaceae	Tillandsia	Tillandsia cajamarcensis	NA	4	1	1	1	0	CR	CR B2a	0	CR	NA
Bromeliaceae	Tillandsia	Tillandsia califani	NA	4	1	1	1	0	CR	CR B2a	0	CR	NA
Bromeliaceae	Tillandsia	Tillandsia caliginosa	46074.6	24	7	6	6	1	VU	VU B2a	14.3	VU	LC or NT
Bromeliaceae	Tillandsia	Tillandsia callichroma	NA	4	1	1	1	0	CR	CR B2a	0	CR	NA
Bromeliaceae	Tillandsia	Tillandsia calochlamys	NA	8	2	2	2	1	EN	EN B2a	50	EN	NA
Bromeliaceae	Tillandsia	Tillandsia calothyrsus	134506	108	31	13	18	4	LC or NT	LC or NT B1a+B2a	38.7	LC or NT	LC or NT
Bromeliaceae	Tillandsia	Tillandsia caloura	NA	4	2	1	1	0	CR	CR B2a	0	CR	NA
Bromeliaceae	Tillandsia	Tillandsia camargoensis	NA	4	2	1	1	0	CR	CR B2a	0	CR	NA
Bromeliaceae	Tillandsia	Tillandsia candida	NA	8	2	2	2	1	EN	EN B2a	50	EN	NA
Bromeliaceae	Tillandsia	Tillandsia canescens	20253.4	32	9	5	7	3	VU	VU B2a	55.6	VU	LC or NT
Bromeliaceae	Tillandsia	Tillandsia capillaris	1.14677e+07	836	283	116	159	29	LC or NT	LC or NT B1a+B2a	27.6	LC or NT	LC or NT
Bromeliaceae	Tillandsia	Tillandsia capistranoensis	NA	4	1	1	1	0	CR	CR B2a	0	CR	NA
Bromeliaceae	Tillandsia	Tillandsia capitata	1.05763e+06	136	42	17	28	7	LC or NT	LC or NT B1a+B2a	26.2	LC or NT	LC or NT
Bromeliaceae	Tillandsia	Tillandsia caputmedusae	1.29956e+06	1352	436	128	250	46	LC or NT	LC or NT B1a+B2a	28	LC or NT	LC or NT
Bromeliaceae	Tillandsia	Tillandsia cardenasii	6.17869e+06	312	110	27	44	14	LC or NT	LC or NT B1a+B2a	47.3	LC or NT	LC or NT
Bromeliaceae	Tillandsia	Tillandsia carlos-hankii	26342.9	56	15	8	12	0	LC or NT	LC or NT B1a+B2a	0	LC or NT	LC or NT
Bromeliaceae	Tillandsia	Tillandsia carlsoniae	21060.7	72	36	6	15	1	LC or NT	LC or NT B1a+B2a	8.3	LC or NT	LC or NT
Bromeliaceae	Tillandsia	Tillandsia carminea	NA	8	2	2	2	1	EN	EN B2a	50	EN	NA
Bromeliaceae	Tillandsia	Tillandsia carnosa	424124	24	10	5	5	0	EN	EN B2a	0	EN	LC or NT
Bromeliaceae	Tillandsia	Tillandsia carrierei	NA	4	1	1	1	0	CR	CR B2a	0	CR	NA
Bromeliaceae	Tillandsia	Tillandsia carrilloi	NA	4	1	1	1	0	CR	CR B2a	0	CR	NA
Bromeliaceae	Tillandsia	Tillandsia castelensis	NA	4	1	1	1	1	LC or NT	LC or NT B2a	100	CR	NA
Bromeliaceae	Tillandsia	Tillandsia castellanii	122919	24	6	6	6	0	VU	VU B2a	0	VU	LC or NT
Bromeliaceae	Tillandsia	Tillandsia catimbauensis	1894.9	28	15	3	4	1	EN	EN B1a+B2a	80	EN	EN
Bromeliaceae	Tillandsia	Tillandsia caulescens	142797	56	25	8	11	0	LC or NT	LC or NT B1a+B2a	0	LC or NT	LC or NT
Bromeliaceae	Tillandsia	Tillandsia cauliflora	NA	4	2	1	1	0	CR	CR B2a	0	CR	NA
Bromeliaceae	Tillandsia	Tillandsia celata	NA	4	1	1	1	0	CR	CR B2a	0	CR	NA
Bromeliaceae	Tillandsia	Tillandsia cernua	NA	4	2	1	1	0	CR	CR B2a	0	CR	NA
Bromeliaceae	Tillandsia	Tillandsia cerrateana	71	12	3	2	2	1	EN	EN B1a+B2a	66.7	EN	EN
Bromeliaceae	Tillandsia	Tillandsia chaetophylla	200351	76	26	13	16	2	LC or NT	LC or NT B1a+B2a	19.2	LC or NT	LC or NT
Bromeliaceae	Tillandsia	Tillandsia chalcatzingensis	NA	4	1	1	1	0	CR	CR B2a	0	CR	NA
Bromeliaceae	Tillandsia	Tillandsia chapalillaensis	NA	4	1	1	1	0	CR	CR B2a	0	CR	NA
Bromeliaceae	Tillandsia	Tillandsia chapeuensis	131055	72	25	8	15	2	LC or NT	LC or NT B1a+B2a	8	LC or NT	LC or NT
Bromeliaceae	Tillandsia	Tillandsia chartacea	NA	4	2	1	1	0	CR	CR B2a	0	CR	NA
Bromeliaceae	Tillandsia	Tillandsia chiapensis	676	16	5	3	4	1	EN	EN B1a+B2a	20	EN	EN
Bromeliaceae	Tillandsia	Tillandsia chiletensis	NA	4	1	1	1	0	CR	CR B2a	0	CR	NA
Bromeliaceae	Tillandsia	Tillandsia chlorophylla	117285	140	86	17	26	4	LC or NT	LC or NT B1a+B2a	11.6	LC or NT	LC or NT
Bromeliaceae	Tillandsia	Tillandsia chontalensis	1.82857e+06	208	68	27	35	10	LC or NT	LC or NT B1a+B2a	32.4	LC or NT	LC or NT
Bromeliaceae	Tillandsia	Tillandsia chusgonensis	NA	4	1	1	1	0	CR	CR B2a	0	CR	NA
Bromeliaceae	Tillandsia	Tillandsia circinnatioides	38379.3	44	12	6	7	2	VU	VU B2a	50	VU	LC or NT
Bromeliaceae	Tillandsia	Tillandsia clavigera	1.57923e+06	112	35	22	25	10	LC or NT	LC or NT B1a+B2a	45.7	LC or NT	LC or NT
Bromeliaceae	Tillandsia	Tillandsia coalcomanensis	NA	4	1	1	1	0	CR	CR B2a	0	CR	NA
Bromeliaceae	Tillandsia	Tillandsia coinaensis	NA	4	1	1	1	0	CR	CR B2a	0	CR	NA
Bromeliaceae	Tillandsia	Tillandsia colorata	NA	4	1	1	1	0	CR	CR B2a	0	CR	NA
Bromeliaceae	Tillandsia	Tillandsia comarapaensis	6.13137e+06	312	110	27	44	14	LC or NT	LC or NT B1a+B2a	47.3	LC or NT	LC or NT
Bromeliaceae	Tillandsia	Tillandsia comitanensis	4077.7	28	7	5	7	1	VU	VU B1a+B2a	14.3	VU	VU
Bromeliaceae	Tillandsia	Tillandsia commixa	16834.5	8	4	2	2	1	EN	EN B2a	50	EN	VU
Bromeliaceae	Tillandsia	Tillandsia compacta	4.19889e+06	176	53	35	37	14	LC or NT	LC or NT B1a+B2a	47.2	LC or NT	LC or NT
Bromeliaceae	Tillandsia	Tillandsia complanata	5.40695e+06	1276	484	140	239	74	LC or NT	LC or NT B1a+B2a	33.9	LC or NT	LC or NT
Bromeliaceae	Tillandsia	Tillandsia compressa	717990	108	31	18	24	6	LC or NT	LC or NT B1a+B2a	29	LC or NT	LC or NT
Bromeliaceae	Tillandsia	Tillandsia concolor	6.08671e+06	620	231	44	96	21	LC or NT	LC or NT B1a+B2a	35.1	LC or NT	LC or NT
Bromeliaceae	Tillandsia	Tillandsia confertiflora	42641.8	16	4	4	4	0	EN	EN B2a	0	EN	LC or NT
Bromeliaceae	Tillandsia	Tillandsia confinis	5.18297e+06	456	198	60	77	18	LC or NT	LC or NT B1a+B2a	31.3	LC or NT	LC or NT
Bromeliaceae	Tillandsia	Tillandsia contorta	971218	192	58	26	34	12	LC or NT	LC or NT B1a+B2a	51.7	LC or NT	LC or NT
Bromeliaceae	Tillandsia	Tillandsia copalaensis	27.1	12	3	2	2	0	EN	EN B1a+B2a	0	EN	EN
Bromeliaceae	Tillandsia	Tillandsia copanensis	NA	4	1	1	1	0	CR	CR B2a	0	CR	NA
Bromeliaceae	Tillandsia	Tillandsia copynii	163314	28	9	6	6	0	VU	VU B2a	0	VU	LC or NT
Bromeliaceae	Tillandsia	Tillandsia cornuta	NA	4	1	1	1	1	LC or NT	LC or NT B2a	100	CR	NA
Bromeliaceae	Tillandsia	Tillandsia cossonii	64788	72	23	11	13	3	LC or NT	LC or NT B1a+B2a	39.1	LC or NT	LC or NT
Bromeliaceae	Tillandsia	Tillandsia cotagaitensis	NA	4	2	1	1	0	CR	CR B2a	0	CR	NA
Bromeliaceae	Tillandsia	Tillandsia crenulipetala	615.1	12	3	2	2	1	EN	EN B1a+B2a	66.7	EN	EN
Bromeliaceae	Tillandsia	Tillandsia crispa	1.25736e+06	56	18	8	7	4	VU	VU B2a	72.2	VU	LC or NT
Bromeliaceae	Tillandsia	Tillandsia crista-gallii	NA	4	1	1	1	0	CR	CR B2a	0	CR	NA
Bromeliaceae	Tillandsia	Tillandsia cryptopoda	31938.6	48	14	10	11	8	LC or NT	LC or NT B1a+B2a	71.4	LC or NT	LC or NT
Bromeliaceae	Tillandsia	Tillandsia cucaensis	40307.3	24	6	4	4	2	EN	EN B2a	50	EN	LC or NT
Bromeliaceae	Tillandsia	Tillandsia cucullata	195246	32	11	6	6	1	VU	VU B2a	36.4	VU	LC or NT
Bromeliaceae	Tillandsia	Tillandsia curvifolia	NA	4	1	1	1	0	CR	CR B2a	0	CR	NA
Bromeliaceae	Tillandsia	Tillandsia cuspidata	NA	8	2	2	2	0	EN	EN B2a	0	EN	NA
Bromeliaceae	Tillandsia	Tillandsia cyanea	5.59266e+06	96	26	17	20	2	LC or NT	LC or NT B1a+B2a	15.4	LC or NT	LC or NT
Bromeliaceae	Tillandsia	Tillandsia dasyliriifolia	620390	584	217	66	90	27	LC or NT	LC or NT B1a+B2a	48.8	LC or NT	LC or NT
Bromeliaceae	Tillandsia	Tillandsia deflexa	14531.5	16	6	3	4	3	EN	EN B2a	83.3	EN	VU
Bromeliaceae	Tillandsia	Tillandsia delicata	6.13363e+06	312	109	27	44	14	LC or NT	LC or NT B1a+B2a	47.7	LC or NT	LC or NT
Bromeliaceae	Tillandsia	Tillandsia delicatula	40325.9	20	5	5	5	2	EN	EN B2a	40	EN	LC or NT
Bromeliaceae	Tillandsia	Tillandsia demissa	NA	4	1	1	1	0	CR	CR B2a	0	CR	NA
Bromeliaceae	Tillandsia	Tillandsia denudata	8.08185e+06	444	153	46	71	23	LC or NT	LC or NT B1a+B2a	43.1	LC or NT	LC or NT
Bromeliaceae	Tillandsia	Tillandsia deppeana	9.67492e+06	620	209	50	86	22	LC or NT	LC or NT B1a+B2a	42.1	LC or NT	LC or NT
Bromeliaceae	Tillandsia	Tillandsia dexteri	227.7	4	3	1	1	0	EN	EN B1a+B2a	0	EN	EN
Bromeliaceae	Tillandsia	Tillandsia diaguitensis	149395	40	15	9	8	3	VU	VU B2a	66.7	VU	LC or NT
Bromeliaceae	Tillandsia	Tillandsia dichrophylla	38707.3	16	4	4	4	2	EN	EN B2a	50	EN	LC or NT
Bromeliaceae	Tillandsia	Tillandsia didisticha	4.08119e+06	496	230	71	89	23	LC or NT	LC or NT B1a+B2a	44.8	LC or NT	LC or NT
Bromeliaceae	Tillandsia	Tillandsia didistichoides	2.63942e+06	88	24	14	20	8	LC or NT	LC or NT B1a+B2a	41.7	LC or NT	LC or NT
Bromeliaceae	Tillandsia	Tillandsia dielsii	6.06583e+06	380	145	34	58	15	LC or NT	LC or NT B1a+B2a	37.2	LC or NT	LC or NT
Bromeliaceae	Tillandsia	Tillandsia diffusa	NA	8	2	2	2	0	EN	EN B2a	0	EN	NA
Bromeliaceae	Tillandsia	Tillandsia diguetii	20.5	12	4	1	3	2	EN	EN B1a+B2a	75	EN	EN
Bromeliaceae	Tillandsia	Tillandsia dodsonii	NA	4	1	1	1	1	LC or NT	LC or NT B2a	100	CR	NA
Bromeliaceae	Tillandsia	Tillandsia dorisdaltoniae	NA	4	2	1	1	0	CR	CR B2a	0	CR	NA
Bromeliaceae	Tillandsia	Tillandsia dorotheehaseae	NA	4	1	1	1	0	CR	CR B2a	0	CR	NA
Bromeliaceae	Tillandsia	Tillandsia dugesii	150614	164	50	21	25	3	LC or NT	LC or NT B1a+B2a	36	LC or NT	LC or NT
Bromeliaceae	Tillandsia	Tillandsia dura	2389316	216	76	27	46	13	LC or NT	LC or NT B1a+B2a	34.2	LC or NT	LC or NT
Bromeliaceae	Tillandsia	Tillandsia duratii	4.40864e+06	496	206	102	105	18	LC or NT	LC or NT B1a+B2a	25.2	LC or NT	LC or NT
Bromeliaceae	Tillandsia	Tillandsia dyeriana	NA	8	2	2	2	1	EN	EN B2a	50	EN	NA
Bromeliaceae	Tillandsia	Tillandsia eistetteri	241232	52	14	8	10	4	VU	VU B2a	50	VU	LC or NT
Bromeliaceae	Tillandsia	Tillandsia eizii	6.06583e+06	388	139	33	56	17	LC or NT	LC or NT B1a+B2a	44.6	LC or NT	LC or NT
Bromeliaceae	Tillandsia	Tillandsia elegans	613.3	28	8	3	4	0	EN	EN B1a+B2a	0	EN	EN
Bromeliaceae	Tillandsia	Tillandsia elizabethae	2710.9	32	10	5	7	1	VU	VU B1a+B2a	20	VU	VU
Bromeliaceae	Tillandsia	Tillandsia elongata	8.94882e+06	628	196	79	112	26	LC or NT	LC or NT B1a+B2a	35.2	LC or NT	LC or NT
Bromeliaceae	Tillandsia	Tillandsia eltoniana	NA	4	1	1	1	0	CR	CR B2a	0	CR	NA
Bromeliaceae	Tillandsia	Tillandsia elusiva	NA	4	1	1	1	1	LC or NT	LC or NT B2a	100	CR	NA
Bromeliaceae	Tillandsia	Tillandsia elvirae-grossiae	1964.9	12	4	3	3	0	EN	EN B1a+B2a	0	EN	EN
Bromeliaceae	Tillandsia	Tillandsia emergens	8763.4	52	14	6	9	3	VU	VU B1a+B2a	50	VU	VU
Bromeliaceae	Tillandsia	Tillandsia engleriana	6.06583e+06	320	111	28	45	16	LC or NT	LC or NT B1a+B2a	49.5	LC or NT	LC or NT
Bromeliaceae	Tillandsia	Tillandsia erecta	3293.6	16	4	4	4	1	EN	EN B1a+B2a	25	EN	EN
Bromeliaceae	Tillandsia	Tillandsia erici	NA	4	1	1	1	0	CR	CR B2a	0	CR	NA
Bromeliaceae	Tillandsia	Tillandsia ermitae	NA	4	1	1	1	0	CR	CR B2a	0	CR	NA
Bromeliaceae	Tillandsia	Tillandsia erubescens	596954	432	148	45	76	15	LC or NT	LC or NT B1a+B2a	38.5	LC or NT	LC or NT
Bromeliaceae	Tillandsia	Tillandsia escahuascensis	NA	4	1	1	1	0	CR	CR B2a	0	CR	NA
Bromeliaceae	Tillandsia	Tillandsia espinosae	NA	4	1	1	1	0	CR	CR B2a	0	CR	NA
Bromeliaceae	Tillandsia	Tillandsia esseriana	8	8	3	2	2	0	EN	EN B1a+B2a	0	EN	EN
Bromeliaceae	Tillandsia	Tillandsia exserta	38950.4	60	31	12	14	3	LC or NT	LC or NT B1a+B2a	32.3	LC or NT	LC or NT
Bromeliaceae	Tillandsia	Tillandsia fasciculata	1.18752e+07	3588	1186	314	621	131	LC or NT	LC or NT B1a+B2a	33.3	LC or NT	LC or NT
Bromeliaceae	Tillandsia	Tillandsia fascifolia	NA	4	2	1	1	0	CR	CR B2a	0	CR	NA
Bromeliaceae	Tillandsia	Tillandsia fassettii	NA	4	1	1	1	1	LC or NT	LC or NT B2a	100	CR	NA
Bromeliaceae	Tillandsia	Tillandsia fawcettii	NA	4	1	1	1	1	LC or NT	LC or NT B2a	100	CR	NA
Bromeliaceae	Tillandsia	Tillandsia fendleri	9.95015e+06	852	274	110	142	45	LC or NT	LC or NT B1a+B2a	47.1	LC or NT	LC or NT
Bromeliaceae	Tillandsia	Tillandsia ferreyrae	14154.2	16	5	4	4	0	EN	EN B2a	0	EN	VU
Bromeliaceae	Tillandsia	Tillandsia ferrisiana	NA	4	1	1	1	1	LC or NT	LC or NT B2a	100	CR	NA
Bromeliaceae	Tillandsia	Tillandsia festucoides	1.04655e+07	1472	601	120	230	66	LC or NT	LC or NT B1a+B2a	32.8	LC or NT	LC or NT
Bromeliaceae	Tillandsia	Tillandsia filifolia	6.141e+06	1028	427	82	162	34	LC or NT	LC or NT B1a+B2a	25.3	LC or NT	LC or NT
Bromeliaceae	Tillandsia	Tillandsia flabellata	8.44626e+06	744	298	56	105	28	LC or NT	LC or NT B1a+B2a	51.3	LC or NT	LC or NT
Bromeliaceae	Tillandsia	Tillandsia flagellata	9957.3	32	8	6	7	1	VU	VU B1a+B2a	12.5	VU	VU
Bromeliaceae	Tillandsia	Tillandsia flavobracteata	40263	24	9	5	5	0	EN	EN B2a	0	EN	LC or NT
Bromeliaceae	Tillandsia	Tillandsia flexuosa	1.11126e+07	972	321	148	177	52	LC or NT	LC or NT B1a+B2a	39.3	LC or NT	LC or NT
Bromeliaceae	Tillandsia	Tillandsia floresensis	6.06583e+06	312	109	27	44	14	LC or NT	LC or NT B1a+B2a	47.7	LC or NT	LC or NT
Bromeliaceae	Tillandsia	Tillandsia floribunda	109184	48	13	8	10	0	VU	VU B2a	0	VU	LC or NT
Bromeliaceae	Tillandsia	Tillandsia foliosa	6.24289e+06	352	128	30	51	17	LC or NT	LC or NT B1a+B2a	43.8	LC or NT	LC or NT
Bromeliaceae	Tillandsia	Tillandsia fragrans	6.11711e+06	416	148	37	63	19	LC or NT	LC or NT B1a+B2a	42.6	LC or NT	LC or NT
Bromeliaceae	Tillandsia	Tillandsia franciscoi	NA	4	1	1	1	1	LC or NT	LC or NT B2a	100	CR	NA
Bromeliaceae	Tillandsia	Tillandsia frank-hasei	NA	4	1	1	1	1	LC or NT	LC or NT B2a	100	CR	NA
Bromeliaceae	Tillandsia	Tillandsia fuchsii	6.46376e+06	404	141	40	58	19	LC or NT	LC or NT B1a+B2a	49.6	LC or NT	LC or NT
Bromeliaceae	Tillandsia	Tillandsia funckeana	5071.5	16	4	2	4	1	EN	EN B2a	25	EN	VU
Bromeliaceae	Tillandsia	Tillandsia funebris	645987	80	27	16	19	2	LC or NT	LC or NT B1a+B2a	14.8	LC or NT	LC or NT
Bromeliaceae	Tillandsia	Tillandsia fusiformis	NA	4	2	1	1	0	CR	CR B2a	0	CR	NA
Bromeliaceae	Tillandsia	Tillandsia gardneri	1.36053e+07	2460	961	277	478	93	LC or NT	LC or NT B1a+B2a	23.5	LC or NT	LC or NT
Bromeliaceae	Tillandsia	Tillandsia geissei	NA	4	1	1	1	0	CR	CR B2a	0	CR	NA
Bromeliaceae	Tillandsia	Tillandsia geminiflora	1.29892e+07	3052	1154	265	573	108	LC or NT	LC or NT B1a+B2a	31	LC or NT	LC or NT
Bromeliaceae	Tillandsia	Tillandsia genseri	NA	4	1	1	1	0	CR	CR B2a	0	CR	NA
Bromeliaceae	Tillandsia	Tillandsia ghiesbreghtii	6.33223e+06	408	144	38	60	16	LC or NT	LC or NT B1a+B2a	38.2	LC or NT	LC or NT
Bromeliaceae	Tillandsia	Tillandsia gilliesii	1.33869e+06	104	28	26	25	3	LC or NT	LC or NT B1a+B2a	14.3	LC or NT	LC or NT
Bromeliaceae	Tillandsia	Tillandsia gilmartiniae	27098.6	28	7	7	7	1	VU	VU B2a	14.3	VU	LC or NT
Bromeliaceae	Tillandsia	Tillandsia globosa	3.53594e+06	244	79	42	55	15	LC or NT	LC or NT B1a+B2a	34.2	LC or NT	LC or NT
Bromeliaceae	Tillandsia	Tillandsia glossophylla	NA	4	1	1	1	0	CR	CR B2a	0	CR	NA
Bromeliaceae	Tillandsia	Tillandsia gracillima	NA	4	1	1	1	0	CR	CR B2a	0	CR	NA
Bromeliaceae	Tillandsia	Tillandsia grandis	2290.9	24	11	4	4	2	EN	EN B1a+B2a	81.8	EN	EN
Bromeliaceae	Tillandsia	Tillandsia grazielae	NA	4	2	1	1	1	LC or NT	LC or NT B2a	100	CR	NA
Bromeliaceae	Tillandsia	Tillandsia grossispicata	NA	4	1	1	1	0	CR	CR B2a	0	CR	NA
Bromeliaceae	Tillandsia	Tillandsia gruberi	NA	4	1	1	1	0	CR	CR B2a	0	CR	NA
Bromeliaceae	Tillandsia	Tillandsia guatemalensis	6.16501e+06	1116	473	75	156	45	LC or NT	LC or NT B1a+B2a	48	LC or NT	LC or NT
Bromeliaceae	Tillandsia	Tillandsia guelzii	NA	4	1	1	1	0	CR	CR B2a	0	CR	NA
Bromeliaceae	Tillandsia	Tillandsia guenther-nolleri	NA	8	2	2	2	0	EN	EN B2a	0	EN	NA
Bromeliaceae	Tillandsia	Tillandsia guerreroensis	NA	8	2	2	2	0	EN	EN B2a	0	EN	NA
Bromeliaceae	Tillandsia	Tillandsia gymnobotrya	6.12684e+06	816	284	47	112	20	LC or NT	LC or NT B1a+B2a	27.1	LC or NT	LC or NT
Bromeliaceae	Tillandsia	Tillandsia hamaleana	44683.7	72	21	12	16	3	LC or NT	LC or NT B1a+B2a	19	LC or NT	LC or NT
Bromeliaceae	Tillandsia	Tillandsia hammeri	7822.1	44	17	4	6	2	VU	VU B1a+B2a	64.7	VU	VU
Bromeliaceae	Tillandsia	Tillandsia harrisii	8	8	3	2	2	1	EN	EN B1a+B2a	66.7	EN	EN
Bromeliaceae	Tillandsia	Tillandsia hasei	NA	4	1	1	1	0	CR	CR B2a	0	CR	NA
Bromeliaceae	Tillandsia	Tillandsia hauggiae	NA	8	2	2	2	0	EN	EN B2a	0	EN	NA
Bromeliaceae	Tillandsia	Tillandsia hegeri	NA	4	1	1	1	0	CR	CR B2a	0	CR	NA
Bromeliaceae	Tillandsia	Tillandsia helmutii	NA	8	2	2	2	0	EN	EN B2a	0	EN	NA
Bromeliaceae	Tillandsia	Tillandsia hemkeri	NA	4	1	1	1	0	CR	CR B2a	0	CR	NA
Bromeliaceae	Tillandsia	Tillandsia heterandra	9.31228e+06	460	165	56	79	26	LC or NT	LC or NT B1a+B2a	42.4	LC or NT	LC or NT
Bromeliaceae	Tillandsia	Tillandsia heteromorpha	5066.7	12	3	3	3	0	EN	EN B2a	0	EN	VU
Bromeliaceae	Tillandsia	Tillandsia heterophylla	114862	176	55	14	28	6	LC or NT	LC or NT B1a+B2a	18.2	LC or NT	LC or NT
Bromeliaceae	Tillandsia	Tillandsia heubergeri	156290	48	16	10	11	2	LC or NT	LC or NT B1a+B2a	25	LC or NT	LC or NT
Bromeliaceae	Tillandsia	Tillandsia hintoniana	5772.7	56	15	3	4	1	EN	EN B2a	80	EN	VU
Bromeliaceae	Tillandsia	Tillandsia hirta	45.2	8	4	2	2	0	EN	EN B1a+B2a	0	EN	EN
Bromeliaceae	Tillandsia	Tillandsia hirtzii	4156	12	5	3	3	2	EN	EN B1a+B2a	60	EN	EN
Bromeliaceae	Tillandsia	Tillandsia hoeijeri	NA	8	2	1	2	0	EN	EN B2a	0	EN	NA
Bromeliaceae	Tillandsia	Tillandsia homostachya	61602.4	48	12	6	10	3	VU	VU B2a	25	VU	LC or NT
Bromeliaceae	Tillandsia	Tillandsia hondurensis	NA	4	1	1	1	0	CR	CR B2a	0	CR	NA
Bromeliaceae	Tillandsia	Tillandsia hotteana	22982.4	56	18	6	13	6	LC or NT	LC or NT B1a+B2a	38.9	LC or NT	LC or NT
Bromeliaceae	Tillandsia	Tillandsia huajuapanensis	NA	4	1	1	1	0	CR	CR B2a	0	CR	NA
Bromeliaceae	Tillandsia	Tillandsia huamenulaensis	NA	4	1	1	1	0	CR	CR B2a	0	CR	NA
Bromeliaceae	Tillandsia	Tillandsia huarazensis	NA	4	1	1	1	0	CR	CR B2a	0	CR	NA
Bromeliaceae	Tillandsia	Tillandsia hubertiana	NA	8	2	2	2	1	EN	EN B2a	50	EN	NA
Bromeliaceae	Tillandsia	Tillandsia humilis	365738	44	14	9	10	1	VU	VU B2a	7.1	VU	LC or NT
Bromeliaceae	Tillandsia	Tillandsia ignesiae	29704.6	52	16	7	8	4	VU	VU B2a	43.8	VU	LC or NT
Bromeliaceae	Tillandsia	Tillandsia ilseana	NA	4	1	1	1	0	CR	CR B2a	0	CR	NA
Bromeliaceae	Tillandsia	Tillandsia imperialis	6.11368e+06	576	198	41	77	22	LC or NT	LC or NT B1a+B2a	38.9	LC or NT	LC or NT
Bromeliaceae	Tillandsia	Tillandsia imporaensis	NA	4	1	1	1	0	CR	CR B2a	0	CR	NA
Bromeliaceae	Tillandsia	Tillandsia incarnata	1.13792e+07	496	161	45	77	18	LC or NT	LC or NT B1a+B2a	34.8	LC or NT	LC or NT
Bromeliaceae	Tillandsia	Tillandsia inconspicua	685	16	4	3	4	0	EN	EN B1a+B2a	0	EN	EN
Bromeliaceae	Tillandsia	Tillandsia indigofera	8	8	3	1	2	0	EN	EN B1a+B2a	0	EN	EN
Bromeliaceae	Tillandsia	Tillandsia inopinata	NA	4	2	1	1	1	LC or NT	LC or NT B2a	100	CR	NA
Bromeliaceae	Tillandsia	Tillandsia insularis	NA	8	2	2	1	1	LC or NT	LC or NT B2a	100	CR	NA
Bromeliaceae	Tillandsia	Tillandsia intermedia	24958.7	84	32	7	14	8	LC or NT	LC or NT B1a+B2a	71.9	LC or NT	LC or NT
Bromeliaceae	Tillandsia	Tillandsia interrupta	NA	8	2	2	2	0	EN	EN B2a	0	EN	NA
Bromeliaceae	Tillandsia	Tillandsia ionantha	6.57063e+06	1328	449	107	186	42	LC or NT	LC or NT B1a+B2a	37.6	LC or NT	LC or NT
Bromeliaceae	Tillandsia	Tillandsia ionochroma	830223	104	39	22	24	5	LC or NT	LC or NT B1a+B2a	20.5	LC or NT	LC or NT
Bromeliaceae	Tillandsia	Tillandsia itaubensis	11501	12	3	2	3	0	EN	EN B2a	0	EN	VU
Bromeliaceae	Tillandsia	Tillandsia ixioides	1.72831e+06	240	68	45	56	6	LC or NT	LC or NT B1a+B2a	16.2	LC or NT	LC or NT
Bromeliaceae	Tillandsia	Tillandsia jenmanii	476338	60	22	14	12	8	LC or NT	LC or NT B1a+B2a	72.7	LC or NT	LC or NT
Bromeliaceae	Tillandsia	Tillandsia jucunda	48198	28	7	5	6	0	VU	VU B2a	0	VU	LC or NT
Bromeliaceae	Tillandsia	Tillandsia juerg-rutschmannii	NA	4	1	1	1	0	CR	CR B2a	0	CR	NA
Bromeliaceae	Tillandsia	Tillandsia juncea	1.34732e+07	2500	893	262	433	103	LC or NT	LC or NT B1a+B2a	32.5	LC or NT	LC or NT
Bromeliaceae	Tillandsia	Tillandsia kalmbacheri	281.6	12	5	2	2	0	EN	EN B1a+B2a	0	EN	EN
Bromeliaceae	Tillandsia	Tillandsia kammii	NA	4	1	1	1	0	CR	CR B2a	0	CR	NA
Bromeliaceae	Tillandsia	Tillandsia karwinskyana	1092	12	5	2	3	2	EN	EN B1a+B2a	80	EN	EN
Bromeliaceae	Tillandsia	Tillandsia kauffmannii	NA	4	1	1	1	0	CR	CR B2a	0	CR	NA
Bromeliaceae	Tillandsia	Tillandsia kautskyi	7577.5	56	25	7	12	4	LC or NT	LC or NT B1a+B2a	24	LC or NT	LC or NT
Bromeliaceae	Tillandsia	Tillandsia kegeliana	7.06434e+06	108	29	22	26	8	LC or NT	LC or NT B1a+B2a	31	LC or NT	LC or NT
Bromeliaceae	Tillandsia	Tillandsia kessleri	6893.2	12	5	3	3	2	EN	EN B2a	60	EN	VU
Bromeliaceae	Tillandsia	Tillandsia kirchhoffiana	6074367	432	160	32	60	17	LC or NT	LC or NT B1a+B2a	35	LC or NT	LC or NT
Bromeliaceae	Tillandsia	Tillandsia kirschnekii	NA	4	1	1	1	0	CR	CR B2a	0	CR	NA
Bromeliaceae	Tillandsia	Tillandsia klausii	NA	4	1	1	1	0	CR	CR B2a	0	CR	NA
Bromeliaceae	Tillandsia	Tillandsia koehresiana	NA	4	2	1	1	1	LC or NT	LC or NT B2a	100	CR	NA
Bromeliaceae	Tillandsia	Tillandsia koideae	NA	4	1	1	1	0	CR	CR B2a	0	CR	NA
Bromeliaceae	Tillandsia	Tillandsia kolbii	NA	8	2	2	2	0	EN	EN B2a	0	EN	NA
Bromeliaceae	Tillandsia	Tillandsia kretzii	NA	4	1	1	1	0	CR	CR B2a	0	CR	NA
Bromeliaceae	Tillandsia	Tillandsia krukoffiana	487154	68	31	12	11	5	LC or NT	LC or NT B1a+B2a	64.5	LC or NT	LC or NT
Bromeliaceae	Tillandsia	Tillandsia kuehhasii	NA	4	1	1	1	0	CR	CR B2a	0	CR	NA
Bromeliaceae	Tillandsia	Tillandsia kuntzeana	24422	24	10	4	4	3	EN	EN B2a	90	EN	LC or NT
Bromeliaceae	Tillandsia	Tillandsia kuzmae	NA	4	1	1	1	0	CR	CR B2a	0	CR	NA
Bromeliaceae	Tillandsia	Tillandsia lajensis	6259545	404	135	31	61	18	LC or NT	LC or NT B1a+B2a	43.7	LC or NT	LC or NT
Bromeliaceae	Tillandsia	Tillandsia laminata	6.07003e+06	328	117	28	46	15	LC or NT	LC or NT B1a+B2a	47	LC or NT	LC or NT
Bromeliaceae	Tillandsia	Tillandsia lampropoda	298808	372	148	35	63	18	LC or NT	LC or NT B1a+B2a	39.2	LC or NT	LC or NT
Bromeliaceae	Tillandsia	Tillandsia landbeckii	61036.5	48	14	6	8	0	VU	VU B2a	0	VU	LC or NT
Bromeliaceae	Tillandsia	Tillandsia langlasseana	440815	28	9	5	6	1	VU	VU B2a	22.2	VU	LC or NT
Bromeliaceae	Tillandsia	Tillandsia latifolia	7.06485e+06	548	184	59	91	15	LC or NT	LC or NT B1a+B2a	29.3	LC or NT	LC or NT
Bromeliaceae	Tillandsia	Tillandsia laui	NA	4	1	1	1	0	CR	CR B2a	0	CR	NA
Bromeliaceae	Tillandsia	Tillandsia lautneri	111704	128	61	18	26	6	LC or NT	LC or NT B1a+B2a	29.5	LC or NT	LC or NT
Bromeliaceae	Tillandsia	Tillandsia laxissima	NA	8	2	2	2	2	LC or NT	LC or NT B2a	100	EN	NA
Bromeliaceae	Tillandsia	Tillandsia leiboldiana	6.1421e+06	1228	405	85	184	58	LC or NT	LC or NT B1a+B2a	41	LC or NT	LC or NT
Bromeliaceae	Tillandsia	Tillandsia lepidosepala	116903	76	30	11	17	3	LC or NT	LC or NT B1a+B2a	20	LC or NT	LC or NT
Bromeliaceae	Tillandsia	Tillandsia lescaillei	NA	4	1	1	1	0	CR	CR B2a	0	CR	NA
Bromeliaceae	Tillandsia	Tillandsia leucopetala	NA	4	1	1	1	0	CR	CR B2a	0	CR	NA
Bromeliaceae	Tillandsia	Tillandsia limae	6.06583e+06	312	109	27	44	15	LC or NT	LC or NT B1a+B2a	48.6	LC or NT	LC or NT
Bromeliaceae	Tillandsia	Tillandsia limarum	NA	4	1	1	1	1	LC or NT	LC or NT B2a	100	CR	NA
Bromeliaceae	Tillandsia	Tillandsia limbata	995609	384	132	47	68	12	LC or NT	LC or NT B1a+B2a	18.2	LC or NT	LC or NT
Bromeliaceae	Tillandsia	Tillandsia lindenii	6.06858e+06	320	111	29	46	14	LC or NT	LC or NT B1a+B2a	46.8	LC or NT	LC or NT
Bromeliaceae	Tillandsia	Tillandsia linearis	1.72294e+06	208	69	23	42	8	LC or NT	LC or NT B1a+B2a	21.7	LC or NT	LC or NT
Bromeliaceae	Tillandsia	Tillandsia lineatispica_x	NA	4	1	1	1	1	LC or NT	LC or NT B2a	100	CR	NA
Bromeliaceae	Tillandsia	Tillandsia lithophila	NA	4	1	1	1	0	CR	CR B2a	0	CR	NA
Bromeliaceae	Tillandsia	Tillandsia loliacea	1.53261e+07	3048	1244	346	576	83	LC or NT	LC or NT B1a+B2a	22.1	LC or NT	LC or NT
Bromeliaceae	Tillandsia	Tillandsia loma-blancae	NA	4	1	1	1	0	CR	CR B2a	0	CR	NA
Bromeliaceae	Tillandsia	Tillandsia longifolia	1.11751e+07	488	162	53	76	26	LC or NT	LC or NT B1a+B2a	45.7	LC or NT	LC or NT
Bromeliaceae	Tillandsia	Tillandsia lorentziana	5.56586e+06	372	149	73	80	14	LC or NT	LC or NT B1a+B2a	28.9	LC or NT	LC or NT
Bromeliaceae	Tillandsia	Tillandsia lotteae	NA	4	2	1	1	0	CR	CR B2a	0	CR	NA
Bromeliaceae	Tillandsia	Tillandsia loxichaensis	NA	4	1	1	1	0	CR	CR B2a	0	CR	NA
Bromeliaceae	Tillandsia	Tillandsia lucida	6.07214e+06	432	153	41	65	22	LC or NT	LC or NT B1a+B2a	41.2	LC or NT	LC or NT
Bromeliaceae	Tillandsia	Tillandsia lutheri	6.06939e+06	324	115	27	46	14	LC or NT	LC or NT B1a+B2a	45.2	LC or NT	LC or NT
Bromeliaceae	Tillandsia	Tillandsia lydiae_x	NA	8	2	2	2	1	EN	EN B2a	50	EN	NA
Bromeliaceae	Tillandsia	Tillandsia lymanii	2889.8	20	5	4	4	0	EN	EN B1a+B2a	0	EN	EN
Bromeliaceae	Tillandsia	Tillandsia macbrideana	34553.3	20	5	5	5	0	EN	EN B2a	0	EN	LC or NT
Bromeliaceae	Tillandsia	Tillandsia macdougallii	393344	300	89	36	46	8	LC or NT	LC or NT B1a+B2a	27	LC or NT	LC or NT
Bromeliaceae	Tillandsia	Tillandsia machupicchuensis	NA	4	1	1	1	1	LC or NT	LC or NT B2a	100	CR	NA
Bromeliaceae	Tillandsia	Tillandsia macrochlamys	48000.3	20	5	4	5	0	EN	EN B2a	0	EN	LC or NT
Bromeliaceae	Tillandsia	Tillandsia macrodactylon	56551.5	16	4	4	4	0	EN	EN B2a	0	EN	LC or NT
Bromeliaceae	Tillandsia	Tillandsia maculata	185740	68	20	9	12	1	LC or NT	LC or NT B1a+B2a	35	LC or NT	LC or NT
Bromeliaceae	Tillandsia	Tillandsia macvaughii	NA	4	2	1	1	0	CR	CR B2a	0	CR	NA
Bromeliaceae	Tillandsia	Tillandsia magnispica	6.10944e+06	316	110	28	45	15	LC or NT	LC or NT B1a+B2a	48.2	LC or NT	LC or NT
Bromeliaceae	Tillandsia	Tillandsia magnusiana	164624	88	29	15	20	2	LC or NT	LC or NT B1a+B2a	6.9	LC or NT	LC or NT
Bromeliaceae	Tillandsia	Tillandsia makoyana	702988	420	134	45	66	9	LC or NT	LC or NT B1a+B2a	32.1	LC or NT	LC or NT
Bromeliaceae	Tillandsia	Tillandsia makrinii	NA	4	1	1	1	0	CR	CR B2a	0	CR	NA
Bromeliaceae	Tillandsia	Tillandsia mallemontii	1.29376e+07	940	319	96	169	32	LC or NT	LC or NT B1a+B2a	28.5	LC or NT	LC or NT
Bromeliaceae	Tillandsia	Tillandsia malyi	NA	4	1	1	1	0	CR	CR B2a	0	CR	NA
Bromeliaceae	Tillandsia	Tillandsia malzinei	8	8	3	2	2	0	EN	EN B1a+B2a	0	EN	EN
Bromeliaceae	Tillandsia	Tillandsia marabascoensis	NA	8	2	2	2	0	EN	EN B2a	0	EN	NA
Bromeliaceae	Tillandsia	Tillandsia marconae	NA	4	1	1	1	0	CR	CR B2a	0	CR	NA
Bromeliaceae	Tillandsia	Tillandsia marnieri-apostollei	NA	4	1	1	1	0	CR	CR B2a	0	CR	NA
Bromeliaceae	Tillandsia	Tillandsia mateoensis	6.06583e+06	328	113	30	47	16	LC or NT	LC or NT B1a+B2a	48.7	LC or NT	LC or NT
Bromeliaceae	Tillandsia	Tillandsia matudae	2263.2	24	7	4	6	1	VU	VU B1a+B2a	14.3	VU	VU
Bromeliaceae	Tillandsia	Tillandsia mauryana	9478.3	76	35	3	5	3	EN	EN B2a	91.4	EN	VU
Bromeliaceae	Tillandsia	Tillandsia membranacifolia	NA	8	2	2	2	0	EN	EN B2a	0	EN	NA
Bromeliaceae	Tillandsia	Tillandsia mereliana	NA	8	2	2	2	0	EN	EN B2a	0	EN	NA
Bromeliaceae	Tillandsia	Tillandsia mezii	NA	4	2	1	1	1	LC or NT	LC or NT B2a	100	CR	NA
Bromeliaceae	Tillandsia	Tillandsia micans	NA	4	1	1	1	0	CR	CR B2a	0	CR	NA
Bromeliaceae	Tillandsia	Tillandsia michelii	136923	20	6	5	5	2	EN	EN B2a	50	EN	LC or NT
Bromeliaceae	Tillandsia	Tillandsia milagrensis	926.3	36	15	2	6	0	VU	VU B1a+B2a	0	VU	VU
Bromeliaceae	Tillandsia	Tillandsia mima	31179.7	32	8	5	7	3	VU	VU B2a	50	VU	LC or NT
Bromeliaceae	Tillandsia	Tillandsia minutiflora	3.14578e+06	80	25	20	17	3	LC or NT	LC or NT B1a+B2a	28	LC or NT	LC or NT
Bromeliaceae	Tillandsia	Tillandsia mirabilis	NA	4	1	1	1	0	CR	CR B2a	0	CR	NA
Bromeliaceae	Tillandsia	Tillandsia mitlaensis	NA	4	1	1	1	0	CR	CR B2a	0	CR	NA
Bromeliaceae	Tillandsia	Tillandsia mixtecorum	NA	4	1	1	1	0	CR	CR B2a	0	CR	NA
Bromeliaceae	Tillandsia	Tillandsia mollis	NA	4	2	1	1	1	LC or NT	LC or NT B2a	100	CR	NA
Bromeliaceae	Tillandsia	Tillandsia monadelpha	1.09604e+07	600	184	82	97	32	LC or NT	LC or NT B1a+B2a	47.8	LC or NT	LC or NT
Bromeliaceae	Tillandsia	Tillandsia montana	83442.3	72	22	13	16	0	LC or NT	LC or NT B1a+B2a	0	LC or NT	LC or NT
Bromeliaceae	Tillandsia	Tillandsia monticola	367920	56	72	8	10	3	VU	VU B2a	5.6	VU	LC or NT
Bromeliaceae	Tillandsia	Tillandsia mooreana	32111.5	16	6	3	4	0	EN	EN B2a	0	EN	LC or NT
Bromeliaceae	Tillandsia	Tillandsia moscosoi	240.5	20	6	2	3	0	EN	EN B1a+B2a	0	EN	EN
Bromeliaceae	Tillandsia	Tillandsia muhrae	NA	4	1	1	1	0	CR	CR B2a	0	CR	NA
Bromeliaceae	Tillandsia	Tillandsia multicaulis	9.65633e+06	1084	413	73	156	49	LC or NT	LC or NT B1a+B2a	33.2	LC or NT	LC or NT
Bromeliaceae	Tillandsia	Tillandsia multiflora	2.70391e+06	136	36	31	32	6	LC or NT	LC or NT B1a+B2a	22.2	LC or NT	LC or NT
Bromeliaceae	Tillandsia	Tillandsia myosura	925600	88	27	19	22	2	LC or NT	LC or NT B1a+B2a	7.4	LC or NT	LC or NT
Bromeliaceae	Tillandsia	Tillandsia myriantha	NA	8	2	2	2	1	EN	EN B2a	50	EN	NA
Bromeliaceae	Tillandsia	Tillandsia nana	NA	4	1	1	1	0	CR	CR B2a	0	CR	NA
Bromeliaceae	Tillandsia	Tillandsia narthecioides	NA	8	2	2	2	2	LC or NT	LC or NT B2a	100	EN	NA
Bromeliaceae	Tillandsia	Tillandsia neglecta	NA	4	1	1	1	0	CR	CR B2a	0	CR	NA
Bromeliaceae	Tillandsia	Tillandsia nervata	NA	8	2	2	2	1	EN	EN B2a	50	EN	NA
Bromeliaceae	Tillandsia	Tillandsia nervibractea	53148	8	3	2	2	1	EN	EN B2a	33.3	EN	LC or NT
Bromeliaceae	Tillandsia	Tillandsia nervisepala	NA	4	1	1	1	0	CR	CR B2a	0	CR	NA
Bromeliaceae	Tillandsia	Tillandsia nicolasensis	NA	4	1	1	1	1	LC or NT	LC or NT B2a	100	CR	NA
Bromeliaceae	Tillandsia	Tillandsia nolleriana	54753.4	36	9	5	6	0	VU	VU B2a	0	VU	LC or NT
Bromeliaceae	Tillandsia	Tillandsia novakii	NA	8	2	2	2	0	EN	EN B2a	0	EN	NA
Bromeliaceae	Tillandsia	Tillandsia nuptialis	NA	8	2	2	2	0	EN	EN B2a	0	EN	NA
Bromeliaceae	Tillandsia	Tillandsia nuyooensis	NA	4	2	1	1	0	CR	CR B2a	0	CR	NA
Bromeliaceae	Tillandsia	Tillandsia oaxacana	157123	60	18	10	14	2	LC or NT	LC or NT B1a+B2a	16.7	LC or NT	LC or NT
Bromeliaceae	Tillandsia	Tillandsia oblivata	NA	4	1	1	1	0	CR	CR B2a	0	CR	NA
Bromeliaceae	Tillandsia	Tillandsia occulta	NA	4	1	1	1	0	CR	CR B2a	0	CR	NA
Bromeliaceae	Tillandsia	Tillandsia oerstediana	54864.9	104	37	5	18	2	LC or NT	LC or NT B1a+B2a	10.8	LC or NT	LC or NT
Bromeliaceae	Tillandsia	Tillandsia orbicularis	114387	76	23	15	16	4	LC or NT	LC or NT B1a+B2a	39.1	LC or NT	LC or NT
Bromeliaceae	Tillandsia	Tillandsia organensis	65.1	12	3	1	3	1	EN	EN B1a+B2a	33.3	EN	EN
Bromeliaceae	Tillandsia	Tillandsia orogenes	127542	176	66	17	29	13	LC or NT	LC or NT B1a+B2a	56.1	LC or NT	LC or NT
Bromeliaceae	Tillandsia	Tillandsia oropezana	NA	4	1	1	1	0	CR	CR B2a	0	CR	NA
Bromeliaceae	Tillandsia	Tillandsia oroyensis	281838	40	10	7	7	1	VU	VU B2a	30	VU	LC or NT
Bromeliaceae	Tillandsia	Tillandsia ortgiesiana	NA	8	2	2	2	1	EN	EN B2a	50	EN	NA
Bromeliaceae	Tillandsia	Tillandsia oxapampae	NA	4	2	1	1	0	CR	CR B2a	0	CR	NA
Bromeliaceae	Tillandsia	Tillandsia pachyaxon	532.4	12	3	3	3	0	EN	EN B1a+B2a	0	EN	EN
Bromeliaceae	Tillandsia	Tillandsia pacifica	NA	4	1	1	1	0	CR	CR B2a	0	CR	NA
Bromeliaceae	Tillandsia	Tillandsia pallescens	NA	8	2	2	2	2	LC or NT	LC or NT B2a	100	EN	NA
Bromeliaceae	Tillandsia	Tillandsia pallidoflavens	295140	52	20	10	12	4	LC or NT	LC or NT B1a+B2a	35	LC or NT	LC or NT
Bromeliaceae	Tillandsia	Tillandsia pamelae	5360.1	40	17	4	7	0	VU	VU B1a+B2a	0	VU	VU
Bromeliaceae	Tillandsia	Tillandsia pampasensis	NA	4	1	1	1	0	CR	CR B2a	0	CR	NA
Bromeliaceae	Tillandsia	Tillandsia paniculata	24847.3	48	16	10	11	1	LC or NT	LC or NT B1a+B2a	6.2	LC or NT	LC or NT
Bromeliaceae	Tillandsia	Tillandsia paraensis	1.24258e+07	1340	536	210	235	71	LC or NT	LC or NT B1a+B2a	42.9	LC or NT	LC or NT
Bromeliaceae	Tillandsia	Tillandsia paraisoensis	NA	8	2	2	2	0	EN	EN B2a	0	EN	NA
Bromeliaceae	Tillandsia	Tillandsia pardina	9.1	8	6	2	2	1	EN	EN B1a+B2a	66.7	EN	EN
Bromeliaceae	Tillandsia	Tillandsia pardoi	NA	4	1	1	1	0	CR	CR B2a	0	CR	NA
Bromeliaceae	Tillandsia	Tillandsia parryi	82016.9	72	24	10	11	4	LC or NT	LC or NT B1a+B2a	45.8	LC or NT	LC or NT
Bromeliaceae	Tillandsia	Tillandsia parviflora	3.97917e+06	244	102	39	50	15	LC or NT	LC or NT B1a+B2a	31.4	LC or NT	LC or NT
Bromeliaceae	Tillandsia	Tillandsia parvispica	4754.1	12	5	2	3	0	EN	EN B1a+B2a	0	EN	EN
Bromeliaceae	Tillandsia	Tillandsia pastensis	6.27941e+06	376	125	40	60	19	LC or NT	LC or NT B1a+B2a	45.6	LC or NT	LC or NT
Bromeliaceae	Tillandsia	Tillandsia paucifolia	9.40233e+06	408	132	42	65	19	LC or NT	LC or NT B1a+B2a	43.9	LC or NT	LC or NT
Bromeliaceae	Tillandsia	Tillandsia pectinata	15011.6	16	4	4	4	1	EN	EN B2a	25	EN	VU
Bromeliaceae	Tillandsia	Tillandsia peiranoi	NA	8	2	2	2	0	EN	EN B2a	0	EN	NA
Bromeliaceae	Tillandsia	Tillandsia pendulispica	6.25452e+06	360	131	36	55	18	LC or NT	LC or NT B1a+B2a	43.5	LC or NT	LC or NT
Bromeliaceae	Tillandsia	Tillandsia penlandii	562692	304	131	31	55	14	LC or NT	LC or NT B1a+B2a	32.1	LC or NT	LC or NT
Bromeliaceae	Tillandsia	Tillandsia pentasticha	9363.4	8	3	2	2	0	EN	EN B2a	0	EN	VU
Bromeliaceae	Tillandsia	Tillandsia piauiensis	NA	8	2	2	2	0	EN	EN B2a	0	EN	NA
Bromeliaceae	Tillandsia	Tillandsia piepenbringii	NA	4	1	1	1	0	CR	CR B2a	0	CR	NA
Bromeliaceae	Tillandsia	Tillandsia pinicola	8	8	3	1	1	0	CR	CR B1a	0	EN	CR
Bromeliaceae	Tillandsia	Tillandsia pinnatodigitata	NA	4	1	1	1	0	CR	CR B2a	0	CR	NA
Bromeliaceae	Tillandsia	Tillandsia plagiotropica	NA	8	2	2	2	1	EN	EN B2a	50	EN	NA
Bromeliaceae	Tillandsia	Tillandsia platyrhachis	483009	48	14	9	10	1	VU	VU B2a	7.1	VU	LC or NT
Bromeliaceae	Tillandsia	Tillandsia plumosa	178824	248	74	23	36	2	LC or NT	LC or NT B1a+B2a	28.4	LC or NT	LC or NT
Bromeliaceae	Tillandsia	Tillandsia pohliana	12744541	1108	380	164	212	43	LC or NT	LC or NT B1a+B2a	31.3	LC or NT	LC or NT
Bromeliaceae	Tillandsia	Tillandsia polita	6.06583e+06	324	114	30	47	15	LC or NT	LC or NT B1a+B2a	46.5	LC or NT	LC or NT
Bromeliaceae	Tillandsia	Tillandsia polyantha	22302.7	40	10	7	10	1	VU	VU B2a	10	VU	LC or NT
Bromeliaceae	Tillandsia	Tillandsia polystachya	1.39864e+07	2220	819	261	422	72	LC or NT	LC or NT B1a+B2a	21.6	LC or NT	LC or NT
Bromeliaceae	Tillandsia	Tillandsia polzii	7501.9	8	3	2	2	0	EN	EN B2a	0	EN	VU
Bromeliaceae	Tillandsia	Tillandsia ponderosa	6.06583e+06	460	164	37	64	23	LC or NT	LC or NT B1a+B2a	47.6	LC or NT	LC or NT
Bromeliaceae	Tillandsia	Tillandsia porongoensis	NA	4	1	1	1	0	CR	CR B2a	0	CR	NA
Bromeliaceae	Tillandsia	Tillandsia portillae	NA	4	1	1	1	0	CR	CR B2a	0	CR	NA
Bromeliaceae	Tillandsia	Tillandsia praschekii	NA	4	1	1	1	0	CR	CR B2a	0	CR	NA
Bromeliaceae	Tillandsia	Tillandsia pretiosa	6.06583e+06	388	130	37	61	16	LC or NT	LC or NT B1a+B2a	41.5	LC or NT	LC or NT
Bromeliaceae	Tillandsia	Tillandsia prodigiosa	244101	396	125	39	68	13	LC or NT	LC or NT B1a+B2a	30.4	LC or NT	LC or NT
Bromeliaceae	Tillandsia	Tillandsia prolata	NA	4	1	1	1	0	CR	CR B2a	0	CR	NA
Bromeliaceae	Tillandsia	Tillandsia propagulifera	NA	8	2	2	2	0	EN	EN B2a	0	EN	NA
Bromeliaceae	Tillandsia	Tillandsia pruinosa	1.16521e+07	780	278	91	129	44	LC or NT	LC or NT B1a+B2a	34.5	LC or NT	LC or NT
Bromeliaceae	Tillandsia	Tillandsia pseudobaileyi	7.46734e+06	568	204	68	93	29	LC or NT	LC or NT B1a+B2a	48.5	LC or NT	LC or NT
Bromeliaceae	Tillandsia	Tillandsia pseudocardenasii	NA	4	2	1	1	0	CR	CR B2a	0	CR	NA
Bromeliaceae	Tillandsia	Tillandsia pseudomicans	NA	4	1	1	1	0	CR	CR B2a	0	CR	NA
Bromeliaceae	Tillandsia	Tillandsia pseudomontana	NA	4	2	1	1	0	CR	CR B2a	0	CR	NA
Bromeliaceae	Tillandsia	Tillandsia pseudooaxacana	NA	4	1	1	1	0	CR	CR B2a	0	CR	NA
Bromeliaceae	Tillandsia	Tillandsia pseudosetacea	133137	12	5	3	3	1	EN	EN B2a	40	EN	LC or NT
Bromeliaceae	Tillandsia	Tillandsia pseudotetrantha	122751	16	4	4	4	1	EN	EN B2a	25	EN	LC or NT
Bromeliaceae	Tillandsia	Tillandsia pueblensis	12602	184	55	5	13	1	LC or NT	LC or NT B1a+B2a	49.1	LC or NT	LC or NT
Bromeliaceae	Tillandsia	Tillandsia pugiformis	276265	72	21	14	17	0	LC or NT	LC or NT B1a+B2a	0	LC or NT	LC or NT
Bromeliaceae	Tillandsia	Tillandsia punctulata	9581148	1444	540	90	210	54	LC or NT	LC or NT B1a+B2a	34.8	LC or NT	LC or NT
Bromeliaceae	Tillandsia	Tillandsia pyramidata	2202055	60	19	13	14	4	LC or NT	LC or NT B1a+B2a	36.8	LC or NT	LC or NT
Bromeliaceae	Tillandsia	Tillandsia quadripinnata	12016.2	36	9	5	8	1	VU	VU B1a+B2a	11.1	VU	VU
Bromeliaceae	Tillandsia	Tillandsia quaquaflorifera	59612.1	16	4	4	4	0	EN	EN B2a	0	EN	LC or NT
Bromeliaceae	Tillandsia	Tillandsia queroensis	236685	24	6	5	6	1	VU	VU B2a	16.7	VU	LC or NT
Bromeliaceae	Tillandsia	Tillandsia raackii	8	8	3	1	2	0	EN	EN B1a+B2a	0	EN	EN
Bromeliaceae	Tillandsia	Tillandsia racinae	NA	4	1	1	1	1	LC or NT	LC or NT B2a	100	CR	NA
Bromeliaceae	Tillandsia	Tillandsia ramellae	397.4	4	4	1	1	1	LC or NT	EN B1a+B2a	100	EN	EN
Bromeliaceae	Tillandsia	Tillandsia rangelensis	NA	4	1	1	1	0	CR	CR B2a	0	CR	NA
Bromeliaceae	Tillandsia	Tillandsia rariflora	NA	4	1	1	1	0	CR	CR B2a	0	CR	NA
Bromeliaceae	Tillandsia	Tillandsia rectangula	9204019	344	117	35	52	14	LC or NT	LC or NT B1a+B2a	44.4	LC or NT	LC or NT
Bromeliaceae	Tillandsia	Tillandsia recurvata	1.73506e+07	8136	3044	835	1510	199	LC or NT	LC or NT B1a+B2a	22.4	LC or NT	LC or NT
Bromeliaceae	Tillandsia	Tillandsia recurvifolia	3.45615e+06	424	145	72	88	16	LC or NT	LC or NT B1a+B2a	17.9	LC or NT	LC or NT
Bromeliaceae	Tillandsia	Tillandsia reichenbachii	1708752	172	77	31	36	8	LC or NT	LC or NT B1a+B2a	41.6	LC or NT	LC or NT
Bromeliaceae	Tillandsia	Tillandsia remota	52553.9	32	10	6	7	3	VU	VU B2a	30	VU	LC or NT
Bromeliaceae	Tillandsia	Tillandsia restrepoana	6.11111e+06	332	114	31	49	15	LC or NT	LC or NT B1a+B2a	46.5	LC or NT	LC or NT
Bromeliaceae	Tillandsia	Tillandsia retorta	245603	64	16	14	16	1	LC or NT	LC or NT B1a+B2a	6.2	LC or NT	LC or NT
Bromeliaceae	Tillandsia	Tillandsia reuteri	NA	4	2	1	1	0	CR	CR B2a	0	CR	NA
Bromeliaceae	Tillandsia	Tillandsia reversa	12822	16	5	3	4	1	EN	EN B2a	20	EN	VU
Bromeliaceae	Tillandsia	Tillandsia rhodocephala	6.14422e+06	312	109	27	45	14	LC or NT	LC or NT B1a+B2a	47.7	LC or NT	LC or NT
Bromeliaceae	Tillandsia	Tillandsia rhodosticta	4557.3	40	20	4	7	0	VU	VU B1a+B2a	0	VU	VU
Bromeliaceae	Tillandsia	Tillandsia rhomboidea	1.00149e+06	116	39	17	26	9	LC or NT	LC or NT B1a+B2a	33.3	LC or NT	LC or NT
Bromeliaceae	Tillandsia	Tillandsia riocreuxii	6.26128e+06	424	150	43	69	22	LC or NT	LC or NT B1a+B2a	44	LC or NT	LC or NT
Bromeliaceae	Tillandsia	Tillandsia riohondoensis	NA	4	1	1	1	0	CR	CR B2a	0	CR	NA
Bromeliaceae	Tillandsia	Tillandsia rodrigueziana	294554	176	60	22	36	10	LC or NT	LC or NT B1a+B2a	25	LC or NT	LC or NT
Bromeliaceae	Tillandsia	Tillandsia rohdenardinii	NA	4	2	1	2	1	EN	EN B2a	50	EN	NA
Bromeliaceae	Tillandsia	Tillandsia roland-gosselinii	120287	52	15	7	11	5	LC or NT	LC or NT B1a+B2a	53.3	LC or NT	LC or NT
Bromeliaceae	Tillandsia	Tillandsia romeroi	NA	4	1	1	1	1	LC or NT	LC or NT B2a	100	CR	NA
Bromeliaceae	Tillandsia	Tillandsia ropalocarpa	230845	56	15	9	12	2	LC or NT	LC or NT B1a+B2a	13.3	LC or NT	LC or NT
Bromeliaceae	Tillandsia	Tillandsia rosacea	NA	4	1	1	1	0	CR	CR B2a	0	CR	NA
Bromeliaceae	Tillandsia	Tillandsia rosarioae	NA	4	1	1	1	1	LC or NT	LC or NT B2a	100	CR	NA
Bromeliaceae	Tillandsia	Tillandsia roseiflora	657.3	12	6	3	3	0	EN	EN B1a+B2a	0	EN	EN
Bromeliaceae	Tillandsia	Tillandsia roseoscapa	NA	8	2	2	2	2	LC or NT	LC or NT B2a	100	EN	NA
Bromeliaceae	Tillandsia	Tillandsia roseospicata	NA	4	1	1	1	0	CR	CR B2a	0	CR	NA
Bromeliaceae	Tillandsia	Tillandsia rothii	6.46383e+06	312	110	27	44	15	LC or NT	LC or NT B1a+B2a	48.2	LC or NT	LC or NT
Bromeliaceae	Tillandsia	Tillandsia rothschuhiana	393358	140	44	21	30	7	LC or NT	LC or NT B1a+B2a	27.3	LC or NT	LC or NT
Bromeliaceae	Tillandsia	Tillandsia rotundata	20126.5	44	16	6	10	1	VU	VU B2a	18.8	VU	LC or NT
Bromeliaceae	Tillandsia	Tillandsia rubella	6.3374e+06	392	142	38	59	17	LC or NT	LC or NT B1a+B2a	44.4	LC or NT	LC or NT
Bromeliaceae	Tillandsia	Tillandsia rubrispica	NA	4	1	1	1	0	CR	CR B2a	0	CR	NA
Bromeliaceae	Tillandsia	Tillandsia rubroviolacea	2263.5	16	4	3	4	0	EN	EN B1a+B2a	0	EN	EN
Bromeliaceae	Tillandsia	Tillandsia rudolfii	NA	8	2	2	2	0	EN	EN B2a	0	EN	NA
Bromeliaceae	Tillandsia	Tillandsia rusbyi	6.06583e+06	352	132	33	52	16	LC or NT	LC or NT B1a+B2a	48.5	LC or NT	LC or NT
Bromeliaceae	Tillandsia	Tillandsia sagasteguii	83783	16	5	4	4	0	EN	EN B2a	0	EN	LC or NT
Bromeliaceae	Tillandsia	Tillandsia salmonea	NA	4	1	1	1	0	CR	CR B2a	0	CR	NA
Bromeliaceae	Tillandsia	Tillandsia samaipatensis	22782.9	20	9	4	4	2	EN	EN B2a	77.8	EN	LC or NT
Bromeliaceae	Tillandsia	Tillandsia sanctae-martae	NA	4	1	1	1	0	CR	CR B2a	0	CR	NA
Bromeliaceae	Tillandsia	Tillandsia sangii	NA	4	1	1	1	0	CR	CR B2a	0	CR	NA
Bromeliaceae	Tillandsia	Tillandsia santieusebii	NA	4	1	1	1	0	CR	CR B2a	0	CR	NA
Bromeliaceae	Tillandsia	Tillandsia santosiae	NA	4	1	1	1	0	CR	CR B2a	0	CR	NA
Bromeliaceae	Tillandsia	Tillandsia scaligera	NA	4	1	1	1	1	LC or NT	LC or NT B2a	100	CR	NA
Bromeliaceae	Tillandsia	Tillandsia sceptriformis	33228.2	32	8	6	7	0	VU	VU B2a	0	VU	LC or NT
Bromeliaceae	Tillandsia	Tillandsia schatzlii	6.08913e+06	312	109	27	44	15	LC or NT	LC or NT B1a+B2a	48.6	LC or NT	LC or NT
Bromeliaceae	Tillandsia	Tillandsia schiedeana	1.95319e+06	4212	1565	242	632	125	LC or NT	LC or NT B1a+B2a	33.5	LC or NT	LC or NT
Bromeliaceae	Tillandsia	Tillandsia schultzei	168161	36	10	8	9	3	VU	VU B2a	40	VU	LC or NT
Bromeliaceae	Tillandsia	Tillandsia schumanniana	3.2815e+06	584	230	66	107	32	LC or NT	LC or NT B1a+B2a	35.7	LC or NT	LC or NT
Bromeliaceae	Tillandsia	Tillandsia schunkei	NA	8	2	2	2	0	EN	EN B2a	0	EN	NA
Bromeliaceae	Tillandsia	Tillandsia schusteri	NA	4	1	1	1	0	CR	CR B2a	0	CR	NA
Bromeliaceae	Tillandsia	Tillandsia secunda	42664.1	100	28	9	18	1	LC or NT	LC or NT B1a+B2a	3.6	LC or NT	LC or NT
Bromeliaceae	Tillandsia	Tillandsia seemannii	8.10884e+06	572	230	53	86	27	LC or NT	LC or NT B1a+B2a	53.5	LC or NT	LC or NT
Bromeliaceae	Tillandsia	Tillandsia seideliana	NA	4	2	1	1	0	CR	CR B2a	0	CR	NA
Bromeliaceae	Tillandsia	Tillandsia seleriana	6.45116e+06	632	244	52	103	23	LC or NT	LC or NT B1a+B2a	34.4	LC or NT	LC or NT
Bromeliaceae	Tillandsia	Tillandsia selleana	3711.5	28	9	3	4	3	EN	EN B1a+B2a	77.8	EN	EN
Bromeliaceae	Tillandsia	Tillandsia sessemocinoi	6206	12	3	3	3	0	EN	EN B2a	0	EN	VU
Bromeliaceae	Tillandsia	Tillandsia setacea	6.68938e+06	300	94	54	72	15	LC or NT	LC or NT B1a+B2a	23.4	LC or NT	LC or NT
Bromeliaceae	Tillandsia	Tillandsia setiformis	56.3	12	5	1	3	0	EN	EN B1a+B2a	0	EN	EN
Bromeliaceae	Tillandsia	Tillandsia sierrajuarezensis	587.6	16	5	3	4	0	EN	EN B1a+B2a	0	EN	EN
Bromeliaceae	Tillandsia	Tillandsia sigmoidea	NA	4	1	1	1	0	CR	CR B2a	0	CR	NA
Bromeliaceae	Tillandsia	Tillandsia sinuosa	15847.5	12	4	3	3	1	EN	EN B2a	50	EN	VU
Bromeliaceae	Tillandsia	Tillandsia socialis	8	8	3	2	2	0	EN	EN B1a+B2a	0	EN	EN
Bromeliaceae	Tillandsia	Tillandsia sodiroi	230803	48	16	8	10	1	VU	VU B2a	18.8	VU	LC or NT
Bromeliaceae	Tillandsia	Tillandsia somnians	7488.6	20	5	4	4	0	EN	EN B2a	0	EN	VU
Bromeliaceae	Tillandsia	Tillandsia spathacea	2507.9	24	6	3	5	2	EN	EN B1a+B2a	33.3	EN	EN
Bromeliaceae	Tillandsia	Tillandsia sphaerocephala	203279	72	26	14	16	4	LC or NT	LC or NT B1a+B2a	42.3	LC or NT	LC or NT
Bromeliaceae	Tillandsia	Tillandsia spiculosa	1.34415e+07	2200	892	218	330	112	LC or NT	LC or NT B1a+B2a	50.3	LC or NT	LC or NT
Bromeliaceae	Tillandsia	Tillandsia spiraliflora	NA	8	2	2	2	0	EN	EN B2a	0	EN	NA
Bromeliaceae	Tillandsia	Tillandsia spiralipetala	277928	64	29	10	13	2	LC or NT	LC or NT B1a+B2a	17.2	LC or NT	LC or NT
Bromeliaceae	Tillandsia	Tillandsia sprengeliana	1.12893e+06	136	69	21	27	9	LC or NT	LC or NT B1a+B2a	40.6	LC or NT	LC or NT
Bromeliaceae	Tillandsia	Tillandsia standleyi	6.08115e+06	352	122	34	53	21	LC or NT	LC or NT B1a+B2a	48.4	LC or NT	LC or NT
Bromeliaceae	Tillandsia	Tillandsia steiropoda	6.06583e+06	312	109	27	44	14	LC or NT	LC or NT B1a+B2a	47.7	LC or NT	LC or NT
Bromeliaceae	Tillandsia	Tillandsia stellifera	NA	4	1	1	1	0	CR	CR B2a	0	CR	NA
Bromeliaceae	Tillandsia	Tillandsia stenoura	673628	156	56	21	32	12	LC or NT	LC or NT B1a+B2a	32.1	LC or NT	LC or NT
Bromeliaceae	Tillandsia	Tillandsia steyermarkii	NA	8	2	2	2	1	EN	EN B2a	50	EN	NA
Bromeliaceae	Tillandsia	Tillandsia stipitata	NA	8	2	2	2	0	EN	EN B2a	0	EN	NA
Bromeliaceae	Tillandsia	Tillandsia straminea	6.36976e+06	376	129	36	55	14	LC or NT	LC or NT B1a+B2a	40.3	LC or NT	LC or NT
Bromeliaceae	Tillandsia	Tillandsia streptocarpa	8.76413e+06	2640	1107	326	528	60	LC or NT	LC or NT B1a+B2a	18.4	LC or NT	LC or NT
Bromeliaceae	Tillandsia	Tillandsia streptophylla	1.2389e+06	632	214	93	119	31	LC or NT	LC or NT B1a+B2a	39.7	LC or NT	LC or NT
Bromeliaceae	Tillandsia	Tillandsia stricta	9.19019e+06	4152	1429	374	807	132	LC or NT	LC or NT B1a+B2a	23.2	LC or NT	LC or NT
Bromeliaceae	Tillandsia	Tillandsia subalata	243261	84	22	14	18	5	LC or NT	LC or NT B1a+B2a	22.7	LC or NT	LC or NT
Bromeliaceae	Tillandsia	Tillandsia subconcolor	1356.9	12	3	3	3	0	EN	EN B1a+B2a	0	EN	EN
Bromeliaceae	Tillandsia	Tillandsia subulifera	425194	60	20	11	12	4	LC or NT	LC or NT B1a+B2a	40	LC or NT	LC or NT
Bromeliaceae	Tillandsia	Tillandsia suescana	1620.7	16	4	3	4	1	EN	EN B1a+B2a	25	EN	EN
Bromeliaceae	Tillandsia	Tillandsia superba	538174	96	26	10	19	5	LC or NT	LC or NT B1a+B2a	26.9	LC or NT	LC or NT
Bromeliaceae	Tillandsia	Tillandsia superinsignis	553.4	12	6	3	3	1	EN	EN B1a+B2a	16.7	EN	EN
Bromeliaceae	Tillandsia	Tillandsia supermexicana	NA	8	2	2	2	0	EN	EN B2a	0	EN	NA
Bromeliaceae	Tillandsia	Tillandsia tafiensis	NA	4	1	1	1	0	CR	CR B2a	0	CR	NA
Bromeliaceae	Tillandsia	Tillandsia takizawae	NA	4	1	1	1	1	LC or NT	LC or NT B2a	100	CR	NA
Bromeliaceae	Tillandsia	Tillandsia tandapiana	736.9	32	8	2	5	1	EN	EN B1a+B2a	12.5	EN	EN
Bromeliaceae	Tillandsia	Tillandsia taxcoensis	NA	4	1	1	1	0	CR	CR B2a	0	CR	NA
Bromeliaceae	Tillandsia	Tillandsia tecpanensis	NA	4	1	1	1	0	CR	CR B2a	0	CR	NA
Bromeliaceae	Tillandsia	Tillandsia tectorum	313759	68	18	7	12	0	LC or NT	LC or NT B1a+B2a	0	LC or NT	LC or NT
Bromeliaceae	Tillandsia	Tillandsia tehuacana	NA	8	2	2	2	0	EN	EN B2a	0	EN	NA
Bromeliaceae	Tillandsia	Tillandsia teloloapanensis	NA	4	1	1	1	0	CR	CR B2a	0	CR	NA
Bromeliaceae	Tillandsia	Tillandsia tenebra	8.91864e+06	332	114	32	49	15	LC or NT	LC or NT B1a+B2a	46.5	LC or NT	LC or NT
Bromeliaceae	Tillandsia	Tillandsia tenuifolia	1.46154e+07	3920	1458	428	767	127	LC or NT	LC or NT B1a+B2a	24.8	LC or NT	LC or NT
Bromeliaceae	Tillandsia	Tillandsia tenuispica	918064	48	12	11	11	4	LC or NT	LC or NT B1a+B2a	41.7	LC or NT	LC or NT
Bromeliaceae	Tillandsia	Tillandsia teres	NA	4	1	1	1	0	CR	CR B2a	0	CR	NA
Bromeliaceae	Tillandsia	Tillandsia tetrantha	9861056	1260	412	137	217	72	LC or NT	LC or NT B1a+B2a	45.4	LC or NT	LC or NT
Bromeliaceae	Tillandsia	Tillandsia thiekenii	NA	4	1	1	1	0	CR	CR B2a	0	CR	NA
Bromeliaceae	Tillandsia	Tillandsia thyrsigera	3983.6	60	17	4	6	3	VU	VU B1a+B2a	82.4	VU	VU
Bromeliaceae	Tillandsia	Tillandsia tillii	NA	4	1	1	1	0	CR	CR B2a	0	CR	NA
Bromeliaceae	Tillandsia	Tillandsia tomekii	NA	4	1	1	1	0	CR	CR B2a	0	CR	NA
Bromeliaceae	Tillandsia	Tillandsia tonalaensis	NA	4	1	1	1	0	CR	CR B2a	0	CR	NA
Bromeliaceae	Tillandsia	Tillandsia toropiensis	1630.1	28	8	4	6	0	VU	VU B1a+B2a	0	VU	VU
Bromeliaceae	Tillandsia	Tillandsia tortilis	33.8	8	4	2	2	0	EN	EN B1a+B2a	0	EN	EN
Bromeliaceae	Tillandsia	Tillandsia tovarensis	1.0098e+07	632	219	68	108	33	LC or NT	LC or NT B1a+B2a	44.7	LC or NT	LC or NT
Bromeliaceae	Tillandsia	Tillandsia trapeziformis	NA	4	1	1	1	0	CR	CR B2a	0	CR	NA
Bromeliaceae	Tillandsia	Tillandsia trauneri	NA	4	1	1	1	0	CR	CR B2a	0	CR	NA
Bromeliaceae	Tillandsia	Tillandsia trelawniensis	NA	4	2	1	1	1	LC or NT	LC or NT B2a	100	CR	NA
Bromeliaceae	Tillandsia	Tillandsia tricholepis	1.51771e+07	1712	562	246	330	57	LC or NT	LC or NT B1a+B2a	25.8	LC or NT	LC or NT
Bromeliaceae	Tillandsia	Tillandsia tricolor	524083	916	317	67	145	40	LC or NT	LC or NT B1a+B2a	37.2	LC or NT	LC or NT
Bromeliaceae	Tillandsia	Tillandsia trigalensis	NA	4	1	1	1	0	CR	CR B2a	0	CR	NA
Bromeliaceae	Tillandsia	Tillandsia tripinnata	8645	48	19	7	8	3	VU	VU B1a+B2a	63.2	VU	VU
Bromeliaceae	Tillandsia	Tillandsia truncata	6.15745e+06	348	118	36	53	18	LC or NT	LC or NT B1a+B2a	47.5	LC or NT	LC or NT
Bromeliaceae	Tillandsia	Tillandsia turneri	9.41401e+06	616	218	62	82	33	LC or NT	LC or NT B1a+B2a	60.6	LC or NT	LC or NT
Bromeliaceae	Tillandsia	Tillandsia turquinensis	NA	4	1	1	1	0	CR	CR B2a	0	CR	NA
Bromeliaceae	Tillandsia	Tillandsia ulrici	NA	4	1	1	1	0	CR	CR B2a	0	CR	NA
Bromeliaceae	Tillandsia	Tillandsia ultima	22810.7	28	8	5	7	1	VU	VU B2a	12.5	VU	LC or NT
Bromeliaceae	Tillandsia	Tillandsia undulifolia	6.06583e+06	384	146	35	57	16	LC or NT	LC or NT B1a+B2a	37.7	LC or NT	LC or NT
Bromeliaceae	Tillandsia	Tillandsia usneoides	1.72705e+07	6148	2169	685	1176	215	LC or NT	LC or NT B1a+B2a	25.9	LC or NT	LC or NT
Bromeliaceae	Tillandsia	Tillandsia utriculata	1.08373e+07	948	312	114	161	46	LC or NT	LC or NT B1a+B2a	41	LC or NT	LC or NT
Bromeliaceae	Tillandsia	Tillandsia variabilis	6.48816e+06	1204	486	140	227	55	LC or NT	LC or NT B1a+B2a	27.4	LC or NT	LC or NT
Bromeliaceae	Tillandsia	Tillandsia velutina	NA	4	2	1	1	0	CR	CR B2a	0	CR	NA
Bromeliaceae	Tillandsia	Tillandsia ventanaensis	NA	4	1	1	1	0	CR	CR B2a	0	CR	NA
Bromeliaceae	Tillandsia	Tillandsia venusta	18409	12	3	3	3	2	EN	EN B2a	66.7	EN	VU
Bromeliaceae	Tillandsia	Tillandsia verapazana	6.06583e+06	312	109	27	44	14	LC or NT	LC or NT B1a+B2a	47.7	LC or NT	LC or NT
Bromeliaceae	Tillandsia	Tillandsia vernicosa	3.09918e+06	172	81	39	40	9	LC or NT	LC or NT B1a+B2a	24.7	LC or NT	LC or NT
Bromeliaceae	Tillandsia	Tillandsia vicentina	6.07725e+06	544	197	51	81	33	LC or NT	LC or NT B1a+B2a	48.7	LC or NT	LC or NT
Bromeliaceae	Tillandsia	Tillandsia violacea	6.31627e+06	648	225	59	99	26	LC or NT	LC or NT B1a+B2a	34.2	LC or NT	LC or NT
Bromeliaceae	Tillandsia	Tillandsia violaceiflora	NA	4	1	1	1	1	LC or NT	LC or NT B2a	100	CR	NA
Bromeliaceae	Tillandsia	Tillandsia violascens	178639	76	28	9	15	3	LC or NT	LC or NT B1a+B2a	17.9	LC or NT	LC or NT
Bromeliaceae	Tillandsia	Tillandsia viridiflora	6.62321e+06	388	142	35	54	17	LC or NT	LC or NT B1a+B2a	43	LC or NT	LC or NT
Bromeliaceae	Tillandsia	Tillandsia vriesioides	348.7	16	6	2	3	2	EN	EN B1a+B2a	83.3	EN	EN
Bromeliaceae	Tillandsia	Tillandsia wagneriana	11417.1	12	4	3	3	0	EN	EN B2a	0	EN	VU
Bromeliaceae	Tillandsia	Tillandsia walter-tillii	635	16	8	2	2	1	EN	EN B1a+B2a	62.5	EN	EN
Bromeliaceae	Tillandsia	Tillandsia walteri	455863	76	24	15	17	1	LC or NT	LC or NT B1a+B2a	8.3	LC or NT	LC or NT
Bromeliaceae	Tillandsia	Tillandsia weberi	NA	4	2	1	1	0	CR	CR B2a	0	CR	NA
Bromeliaceae	Tillandsia	Tillandsia welzii	NA	8	2	2	2	1	EN	EN B2a	50	EN	NA
Bromeliaceae	Tillandsia	Tillandsia werdermannii	37843.9	52	15	5	8	0	VU	VU B2a	0	VU	LC or NT
Bromeliaceae	Tillandsia	Tillandsia werner-rauhiana	NA	4	1	1	1	0	CR	CR B2a	0	CR	NA
Bromeliaceae	Tillandsia	Tillandsia werneriana	NA	4	1	1	1	0	CR	CR B2a	0	CR	NA
Bromeliaceae	Tillandsia	Tillandsia winkleri	8	8	3	1	2	0	EN	EN B1a+B2a	0	EN	EN
Bromeliaceae	Tillandsia	Tillandsia wuelfinghoffii	NA	4	1	1	1	0	CR	CR B2a	0	CR	NA
Bromeliaceae	Tillandsia	Tillandsia wurdackii	180386	36	11	7	8	3	VU	VU B2a	36.4	VU	LC or NT
Bromeliaceae	Tillandsia	Tillandsia xerographica	23968.4	16	4	4	4	0	EN	EN B2a	0	EN	LC or NT
Bromeliaceae	Tillandsia	Tillandsia xiphioides	1.12837e+06	60	18	14	15	2	LC or NT	LC or NT B1a+B2a	11.1	LC or NT	LC or NT
Bromeliaceae	Tillandsia	Tillandsia yerba-santae	NA	4	1	1	1	0	CR	CR B2a	0	CR	NA
Bromeliaceae	Tillandsia	Tillandsia yuncharaensis	6.68079e+06	312	109	27	44	14	LC or NT	LC or NT B1a+B2a	47.7	LC or NT	LC or NT
Bromeliaceae	Tillandsia	Tillandsia yunckeri	71580	76	23	10	15	7	LC or NT	LC or NT B1a+B2a	47.8	LC or NT	LC or NT
Bromeliaceae	Tillandsia	Tillandsia yutaninoensis	NA	4	1	1	1	0	CR	CR B2a	0	CR	NA
Bromeliaceae	Tillandsia	Tillandsia zacapanensis	NA	4	1	1	1	0	CR	CR B2a	0	CR	NA
Bromeliaceae	Tillandsia	Tillandsia zacualpanensis	NA	4	1	1	1	0	CR	CR B2a	0	CR	NA
Bromeliaceae	Tillandsia	Tillandsia zaragozaensis	NA	4	1	1	1	0	CR	CR B2a	0	CR	NA
Bromeliaceae	Tillandsia	Tillandsia zarumensis	121.6	12	3	2	3	0	EN	EN B1a+B2a	0	EN	EN
Bromeliaceae	Tillandsia	Tillandsia zecheri	NA	8	2	2	2	0	EN	EN B2a	0	EN	NA
Bromeliaceae	Tillandsia	Tillandsia zoquensis	2911.7	8	4	2	2	1	EN	EN B1a+B2a	75	EN	EN
Bromeliaceae	Vriesea	Vriesea acuminata	49463.7	120	39	13	18	10	LC or NT	LC or NT B1a+B2a	76.9	LC or NT	LC or NT
Bromeliaceae	Vriesea	Vriesea agostiniana	11954.8	52	16	6	10	4	VU	VU B1a+B2a	56.2	VU	VU
Bromeliaceae	Vriesea	Vriesea alta	8.21712e+06	320	111	29	46	15	LC or NT	LC or NT B1a+B2a	47.7	LC or NT	LC or NT
Bromeliaceae	Vriesea	Vriesea altimontana	300.6	12	5	2	3	1	EN	EN B1a+B2a	60	EN	EN
Bromeliaceae	Vriesea	Vriesea altodaserrae	283031	416	165	40	82	18	LC or NT	LC or NT B1a+B2a	26.7	LC or NT	LC or NT
Bromeliaceae	Vriesea	Vriesea amadoi	6.06583e+06	308	108	26	43	14	LC or NT	LC or NT B1a+B2a	48.1	LC or NT	LC or NT
Bromeliaceae	Vriesea	Vriesea amazonica	6.57527e+06	80	24	19	19	8	LC or NT	LC or NT B1a+B2a	54.2	LC or NT	LC or NT
Bromeliaceae	Vriesea	Vriesea amethystina	6238.4	12	5	3	3	0	EN	EN B2a	0	EN	VU
Bromeliaceae	Vriesea	Vriesea ampla	7234.6	72	29	6	12	7	LC or NT	LC or NT B1a+B2a	51.7	LC or NT	LC or NT
Bromeliaceae	Vriesea	Vriesea andreettae	284.9	20	5	1	5	0	EN	EN B1a+B2a	0	EN	EN
Bromeliaceae	Vriesea	Vriesea antillana	33.7	12	3	3	3	2	EN	EN B1a+B2a	66.7	EN	EN
Bromeliaceae	Vriesea	Vriesea apiculata	10383.9	68	22	7	14	4	LC or NT	LC or NT B1a+B2a	31.8	LC or NT	LC or NT
Bromeliaceae	Vriesea	Vriesea appariciana	6.79929e+06	320	111	29	46	14	LC or NT	LC or NT B1a+B2a	46.8	LC or NT	LC or NT
Bromeliaceae	Vriesea	Vriesea appendiculata	4	4	3	1	1	0	CR	CR B1a	0	EN	CR
Bromeliaceae	Vriesea	Vriesea arachnoidea	16192.1	44	19	7	9	2	VU	VU B1a+B2a	36.8	VU	VU
Bromeliaceae	Vriesea	Vriesea arpocalyx	6767.5	20	5	4	5	2	EN	EN B2a	40	EN	VU
Bromeliaceae	Vriesea	Vriesea asplundii	759930	160	43	24	36	6	LC or NT	LC or NT B1a+B2a	16.3	LC or NT	LC or NT
Bromeliaceae	Vriesea	Vriesea atra	552938	180	59	29	33	10	LC or NT	LC or NT B1a+B2a	47.5	LC or NT	LC or NT
Bromeliaceae	Vriesea	Vriesea attenuata	23302	72	20	8	13	6	LC or NT	LC or NT B1a+B2a	50	LC or NT	LC or NT
Bromeliaceae	Vriesea	Vriesea balanophora	5123.2	52	16	6	7	4	VU	VU B1a+B2a	68.8	VU	VU
Bromeliaceae	Vriesea	Vriesea barbosae	12	12	7	1	2	0	EN	EN B1a+B2a	0	EN	EN
Bromeliaceae	Vriesea	Vriesea barii	2169.1	24	12	3	4	3	EN	EN B1a+B2a	50	EN	EN
Bromeliaceae	Vriesea	Vriesea barilletii	11586.5	16	5	3	4	1	EN	EN B2a	40	EN	VU
Bromeliaceae	Vriesea	Vriesea bi-beatricis	3612.2	16	4	2	2	2	LC or NT	EN B1a+B2a	100	EN	EN
Bromeliaceae	Vriesea	Vriesea bicolor	1812.2	64	20	5	8	4	VU	VU B1a+B2a	65	VU	VU
Bromeliaceae	Vriesea	Vriesea biguassuensis	12820.1	24	10	5	6	0	VU	VU B1a+B2a	0	VU	VU
Bromeliaceae	Vriesea	Vriesea billbergioides	6.5915e+06	444	160	39	68	20	LC or NT	LC or NT B1a+B2a	46.9	LC or NT	LC or NT
Bromeliaceae	Vriesea	Vriesea bituminosa	1.14744e+07	804	276	87	135	34	LC or NT	LC or NT B1a+B2a	37.7	LC or NT	LC or NT
Bromeliaceae	Vriesea	Vriesea blackburniana	4592.2	28	9	5	6	2	VU	VU B1a+B2a	33.3	VU	VU
Bromeliaceae	Vriesea	Vriesea bleheri	NA	8	2	2	2	0	EN	EN B2a	0	EN	NA
Bromeliaceae	Vriesea	Vriesea boeghii	2.73659e+06	32	10	7	7	2	VU	VU B2a	40	VU	LC or NT
Bromeliaceae	Vriesea	Vriesea bracteosa	11748.2	32	14	4	6	5	VU	VU B1a+B2a	64.3	VU	VU
Bromeliaceae	Vriesea	Vriesea breviscapa	79236.4	72	23	7	14	4	LC or NT	LC or NT B1a+B2a	39.1	LC or NT	LC or NT
Bromeliaceae	Vriesea	Vriesea broadwayi	NA	4	1	1	1	0	CR	CR B2a	0	CR	NA
Bromeliaceae	Vriesea	Vriesea brunei	3818.7	48	14	6	8	6	VU	VU B1a+B2a	78.6	VU	VU
Bromeliaceae	Vriesea	Vriesea brusquensis	59604.6	84	29	15	19	4	LC or NT	LC or NT B1a+B2a	13.8	LC or NT	LC or NT
Bromeliaceae	Vriesea	Vriesea burgeri	17075.1	120	41	10	18	6	LC or NT	LC or NT B1a+B2a	34.1	LC or NT	LC or NT
Bromeliaceae	Vriesea	Vriesea calimaniana	4	4	3	1	1	0	CR	CR B1a	0	EN	CR
Bromeliaceae	Vriesea	Vriesea camptoclada	6406.3	36	11	6	7	3	VU	VU B1a+B2a	54.5	VU	VU
Bromeliaceae	Vriesea	Vriesea capitata	48857.3	56	18	9	12	5	LC or NT	LC or NT B1a+B2a	38.9	LC or NT	LC or NT
Bromeliaceae	Vriesea	Vriesea capixabae	6105.9	80	33	6	17	4	LC or NT	LC or NT B1a+B2a	24.2	LC or NT	LC or NT
Bromeliaceae	Vriesea	Vriesea carinata	9.71783e+06	2408	1075	109	406	81	LC or NT	LC or NT B1a+B2a	34.8	LC or NT	LC or NT
Bromeliaceae	Vriesea	Vriesea castaneobulbosa	164.3	16	7	2	3	1	EN	EN B1a+B2a	28.6	EN	EN
Bromeliaceae	Vriesea	Vriesea cathcartii	92.6	12	5	2	3	0	EN	EN B1a+B2a	0	EN	EN
Bromeliaceae	Vriesea	Vriesea cearensis	73.3	12	12	2	2	1	EN	EN B1a+B2a	16.7	EN	EN
Bromeliaceae	Vriesea	Vriesea cereicola	NA	8	2	2	2	0	EN	EN B2a	0	EN	NA
Bromeliaceae	Vriesea	Vriesea chrysostachys	2.38101e+06	72	23	15	16	7	LC or NT	LC or NT B1a+B2a	43.5	LC or NT	LC or NT
Bromeliaceae	Vriesea	Vriesea claudiana	833.5	16	4	3	4	0	EN	EN B1a+B2a	0	EN	EN
Bromeliaceae	Vriesea	Vriesea colnagoi	249.7	24	9	2	5	0	EN	EN B1a+B2a	0	EN	EN
Bromeliaceae	Vriesea	Vriesea comata	49626.2	116	37	13	17	7	LC or NT	LC or NT B1a+B2a	62.2	LC or NT	LC or NT
Bromeliaceae	Vriesea	Vriesea corcovadensis	1.70177e+06	236	91	31	53	8	LC or NT	LC or NT B1a+B2a	24.2	LC or NT	LC or NT
Bromeliaceae	Vriesea	Vriesea correia-arauji	32628.3	40	16	6	6	1	VU	VU B2a	18.8	VU	LC or NT
Bromeliaceae	Vriesea	Vriesea costae	NA	8	2	2	2	0	EN	EN B2a	0	EN	NA
Bromeliaceae	Vriesea	Vriesea cowellii	NA	8	2	2	2	1	EN	EN B2a	50	EN	NA
Bromeliaceae	Vriesea	Vriesea curvispica	NA	4	1	1	1	0	CR	CR B2a	0	CR	NA
Bromeliaceae	Vriesea	Vriesea cylindrica	163485	144	76	21	28	2	LC or NT	LC or NT B1a+B2a	5.3	LC or NT	LC or NT
Bromeliaceae	Vriesea	Vriesea debilis	8	8	3	2	2	0	EN	EN B1a+B2a	0	EN	EN
Bromeliaceae	Vriesea	Vriesea declinata	3676.7	20	5	3	4	0	EN	EN B1a+B2a	0	EN	EN
Bromeliaceae	Vriesea	Vriesea delicatula	9890.5	60	26	7	13	3	LC or NT	LC or NT B1a+B2a	15.4	LC or NT	LC or NT
Bromeliaceae	Vriesea	Vriesea diantha	10189.3	16	4	3	4	1	EN	EN B2a	25	EN	VU
Bromeliaceae	Vriesea	Vriesea dictyographa	4456.6	28	7	4	5	2	EN	EN B1a+B2a	28.6	EN	EN
Bromeliaceae	Vriesea	Vriesea diffusa	79941.4	136	44	14	19	10	LC or NT	LC or NT B1a+B2a	61.4	LC or NT	LC or NT
Bromeliaceae	Vriesea	Vriesea dissitiflora	461051	324	107	28	49	19	LC or NT	LC or NT B1a+B2a	43.9	LC or NT	LC or NT
Bromeliaceae	Vriesea	Vriesea drepanocarpa	424263	288	101	34	56	18	LC or NT	LC or NT B1a+B2a	44.6	LC or NT	LC or NT
Bromeliaceae	Vriesea	Vriesea dressleri	NA	4	1	1	1	0	CR	CR B2a	0	CR	NA
Bromeliaceae	Vriesea	Vriesea drewii	NA	4	1	1	1	0	CR	CR B2a	0	CR	NA
Bromeliaceae	Vriesea	Vriesea dubia	875992	204	107	28	34	7	LC or NT	LC or NT B1a+B2a	43	LC or NT	LC or NT
Bromeliaceae	Vriesea	Vriesea duidae	568929	156	72	21	14	9	LC or NT	LC or NT B1a+B2a	65.3	LC or NT	LC or NT
Bromeliaceae	Vriesea	Vriesea duvaliana	332394	232	99	13	37	12	LC or NT	LC or NT B1a+B2a	55.6	LC or NT	LC or NT
Bromeliaceae	Vriesea	Vriesea elata	8.24606e+06	408	137	40	64	23	LC or NT	LC or NT B1a+B2a	47.4	LC or NT	LC or NT
Bromeliaceae	Vriesea	Vriesea eltoniana	207569	44	17	6	10	2	VU	VU B2a	11.8	VU	LC or NT
Bromeliaceae	Vriesea	Vriesea ensiformis	2.41568e+06	1168	482	87	207	47	LC or NT	LC or NT B1a+B2a	26.6	LC or NT	LC or NT
Bromeliaceae	Vriesea	Vriesea erythrodactylon	7.12693e+06	916	355	78	155	36	LC or NT	LC or NT B1a+B2a	38.9	LC or NT	LC or NT
Bromeliaceae	Vriesea	Vriesea fenestralis	77552.1	28	8	7	7	0	VU	VU B2a	0	VU	LC or NT
Bromeliaceae	Vriesea	Vriesea fibrosa	379.8	12	4	2	3	3	LC or NT	EN B1a+B2a	100	EN	EN
Bromeliaceae	Vriesea	Vriesea fidelensis	4	4	3	1	1	0	CR	CR B1a	0	EN	CR
Bromeliaceae	Vriesea	Vriesea flammea	1.16144e+07	1208	492	74	207	36	LC or NT	LC or NT B1a+B2a	31.9	LC or NT	LC or NT
Bromeliaceae	Vriesea	Vriesea flava	251396	348	131	42	65	11	LC or NT	LC or NT B1a+B2a	32.1	LC or NT	LC or NT
Bromeliaceae	Vriesea	Vriesea fluminensis	1923.7	12	4	2	3	2	EN	EN B1a+B2a	50	EN	EN
Bromeliaceae	Vriesea	Vriesea fontanae	903.9	24	13	3	5	0	EN	EN B1a+B2a	0	EN	EN
Bromeliaceae	Vriesea	Vriesea fontourae	8	8	3	2	2	1	EN	EN B1a+B2a	33.3	EN	EN
Bromeliaceae	Vriesea	Vriesea fosteriana	7777.9	60	24	9	14	1	LC or NT	LC or NT B1a+B2a	12.5	LC or NT	LC or NT
Bromeliaceae	Vriesea	Vriesea fradensis	8.4	8	4	2	2	0	EN	EN B1a+B2a	0	EN	EN
Bromeliaceae	Vriesea	Vriesea freicanecana	17.1	12	5	1	1	0	CR	CR B1a+B2a	0	CR	CR
Bromeliaceae	Vriesea	Vriesea friburgensis	1.46094e+07	1976	774	229	378	69	LC or NT	LC or NT B1a+B2a	26.5	LC or NT	LC or NT
Bromeliaceae	Vriesea	Vriesea garlippiana	774.6	20	6	3	5	2	EN	EN B1a+B2a	33.3	EN	EN
Bromeliaceae	Vriesea	Vriesea gibba	NA	4	1	1	1	0	CR	CR B2a	0	CR	NA
Bromeliaceae	Vriesea	Vriesea gigantea	1.46002e+07	1080	414	110	201	41	LC or NT	LC or NT B1a+B2a	27.1	LC or NT	LC or NT
Bromeliaceae	Vriesea	Vriesea gladioliflora	1.13833e+07	1292	433	138	215	67	LC or NT	LC or NT B1a+B2a	40.6	LC or NT	LC or NT
Bromeliaceae	Vriesea	Vriesea glutinosa	14112.1	16	4	3	4	4	LC or NT	EN B2a	100	EN	VU
Bromeliaceae	Vriesea	Vriesea goniorhachis	55470.7	16	5	3	4	2	EN	EN B2a	60	EN	LC or NT
Bromeliaceae	Vriesea	Vriesea gracilior	8.2712e+06	372	136	32	53	15	LC or NT	LC or NT B1a+B2a	39.7	LC or NT	LC or NT
Bromeliaceae	Vriesea	Vriesea graciliscapa	3052.1	40	12	3	8	5	VU	VU B1a+B2a	75	VU	VU
Bromeliaceae	Vriesea	Vriesea gradata	1.05255e+06	228	86	32	50	13	LC or NT	LC or NT B1a+B2a	20.9	LC or NT	LC or NT
Bromeliaceae	Vriesea	Vriesea graminifolia	87512.5	148	47	16	24	13	LC or NT	LC or NT B1a+B2a	68.1	LC or NT	LC or NT
Bromeliaceae	Vriesea	Vriesea grandiflora	94.5	12	7	2	2	0	EN	EN B1a+B2a	0	EN	EN
Bromeliaceae	Vriesea	Vriesea guadelupensis	NA	8	2	2	2	0	EN	EN B2a	0	EN	NA
Bromeliaceae	Vriesea	Vriesea guttata	8.98813e+06	952	370	85	169	32	LC or NT	LC or NT B1a+B2a	30.8	LC or NT	LC or NT
Bromeliaceae	Vriesea	Vriesea haberi	NA	4	1	1	1	0	CR	CR B2a	0	CR	NA
Bromeliaceae	Vriesea	Vriesea hainesiorum	12	12	7	1	2	1	EN	EN B1a+B2a	42.9	EN	EN
Bromeliaceae	Vriesea	Vriesea haltonii	10088	48	20	4	8	3	VU	VU B1a+B2a	55	VU	VU
Bromeliaceae	Vriesea	Vriesea haplostachya	NA	4	1	1	1	0	CR	CR B2a	0	CR	NA
Bromeliaceae	Vriesea	Vriesea harmsiana	40489	12	3	3	3	0	EN	EN B2a	0	EN	LC or NT
Bromeliaceae	Vriesea	Vriesea harrylutheri	NA	4	1	1	1	1	LC or NT	LC or NT B2a	100	CR	NA
Bromeliaceae	Vriesea	Vriesea heliconioides	1.01221e+07	1384	534	147	210	69	LC or NT	LC or NT B1a+B2a	40.8	LC or NT	LC or NT
Bromeliaceae	Vriesea	Vriesea heterostachys	9.03584e+06	800	296	67	130	27	LC or NT	LC or NT B1a+B2a	36.5	LC or NT	LC or NT
Bromeliaceae	Vriesea	Vriesea hieroglyphica	272835	104	43	14	22	9	LC or NT	LC or NT B1a+B2a	34.9	LC or NT	LC or NT
Bromeliaceae	Vriesea	Vriesea hitchcockiana	2167.1	20	6	4	5	0	EN	EN B1a+B2a	0	EN	EN
Bromeliaceae	Vriesea	Vriesea hodgei	NA	4	1	1	1	0	CR	CR B2a	0	CR	NA
Bromeliaceae	Vriesea	Vriesea hydrophora	1.1168e+06	68	24	11	16	7	LC or NT	LC or NT B1a+B2a	45.8	LC or NT	LC or NT
Bromeliaceae	Vriesea	Vriesea hygrometrica	1945009	364	131	46	62	24	LC or NT	LC or NT B1a+B2a	42	LC or NT	LC or NT
Bromeliaceae	Vriesea	Vriesea incurva	9782242	844	304	93	129	46	LC or NT	LC or NT B1a+B2a	47	LC or NT	LC or NT
Bromeliaceae	Vriesea	Vriesea incurvata	4.6969e+06	1480	684	67	244	43	LC or NT	LC or NT B1a+B2a	44	LC or NT	LC or NT
Bromeliaceae	Vriesea	Vriesea inflata	353896	756	246	75	159	25	LC or NT	LC or NT B1a+B2a	22	LC or NT	LC or NT
Bromeliaceae	Vriesea	Vriesea insignis	28574	368	135	13	33	14	LC or NT	LC or NT B1a+B2a	67.4	LC or NT	LC or NT
Bromeliaceae	Vriesea	Vriesea interrogatoria	29502.9	96	40	9	22	7	LC or NT	LC or NT B1a+B2a	30	LC or NT	LC or NT
Bromeliaceae	Vriesea	Vriesea itatiaiae	121424	120	44	12	22	7	LC or NT	LC or NT B1a+B2a	50	LC or NT	LC or NT
Bromeliaceae	Vriesea	Vriesea johnstonii	NA	4	1	1	1	1	LC or NT	LC or NT B2a	100	CR	NA
Bromeliaceae	Vriesea	Vriesea jonesiana	6.08462e+06	352	123	30	48	15	LC or NT	LC or NT B1a+B2a	47.2	LC or NT	LC or NT
Bromeliaceae	Vriesea	Vriesea jonghei	943320	284	106	46	58	16	LC or NT	LC or NT B1a+B2a	39.6	LC or NT	LC or NT
Bromeliaceae	Vriesea	Vriesea joyae	NA	4	1	1	1	0	CR	CR B2a	0	CR	NA
Bromeliaceae	Vriesea	Vriesea kathyae	11462.4	84	34	7	11	7	LC or NT	LC or NT B1a+B2a	70.6	LC or NT	LC or NT
Bromeliaceae	Vriesea	Vriesea kautskyana	7598.7	24	10	5	5	0	EN	EN B2a	0	EN	VU
Bromeliaceae	Vriesea	Vriesea kupperiana	195052	124	37	16	20	8	LC or NT	LC or NT B1a+B2a	51.4	LC or NT	LC or NT
Bromeliaceae	Vriesea	Vriesea lancifolia	205820	76	38	8	13	4	LC or NT	LC or NT B1a+B2a	39.5	LC or NT	LC or NT
Bromeliaceae	Vriesea	Vriesea languida	3883	52	19	5	12	1	LC or NT	LC or NT B1a+B2a	5.3	LC or NT	LC or NT
Bromeliaceae	Vriesea	Vriesea latissima	14824	16	4	4	4	3	EN	EN B2a	75	EN	VU
Bromeliaceae	Vriesea	Vriesea leptantha	8	8	4	2	2	0	EN	EN B1a+B2a	0	EN	EN
Bromeliaceae	Vriesea	Vriesea leptopoda	5592.6	80	25	7	11	8	LC or NT	LC or NT B1a+B2a	80	LC or NT	LC or NT
Bromeliaceae	Vriesea	Vriesea leucophylla	12891.2	52	16	6	8	4	VU	VU B1a+B2a	37.5	VU	VU
Bromeliaceae	Vriesea	Vriesea lidicensis	635.4	12	3	2	3	0	EN	EN B1a+B2a	0	EN	EN
Bromeliaceae	Vriesea	Vriesea lilliputiana	32.5	8	3	2	2	1	EN	EN B1a+B2a	66.7	EN	EN
Bromeliaceae	Vriesea	Vriesea limae	5544.2	32	10	5	7	0	VU	VU B1a+B2a	0	VU	VU
Bromeliaceae	Vriesea	Vriesea limonensis	24276.4	44	20	7	10	1	VU	VU B2a	5	VU	LC or NT
Bromeliaceae	Vriesea	Vriesea linharesiae	8	8	3	1	2	0	EN	EN B1a+B2a	0	EN	EN
Bromeliaceae	Vriesea	Vriesea longicaulis	8.4455e+06	700	261	68	121	34	LC or NT	LC or NT B1a+B2a	38.3	LC or NT	LC or NT
Bromeliaceae	Vriesea	Vriesea longiscapa	1.42017e+06	200	68	25	43	18	LC or NT	LC or NT B1a+B2a	39.7	LC or NT	LC or NT
Bromeliaceae	Vriesea	Vriesea longisepala	1073.7	24	12	3	4	2	EN	EN B1a+B2a	75	EN	EN
Bromeliaceae	Vriesea	Vriesea longistaminea	1050.1	28	10	3	5	0	EN	EN B1a+B2a	0	EN	EN
Bromeliaceae	Vriesea	Vriesea lubbersii	1.02483e+06	224	124	31	46	10	LC or NT	LC or NT B1a+B2a	17.7	LC or NT	LC or NT
Bromeliaceae	Vriesea	Vriesea luis-gomezii	167.6	20	5	2	3	2	EN	EN B1a+B2a	80	EN	EN
Bromeliaceae	Vriesea	Vriesea lutheriana	NA	4	1	1	1	0	CR	CR B2a	0	CR	NA
Bromeliaceae	Vriesea	Vriesea macrantha	4716.2	24	8	5	5	2	EN	EN B1a+B2a	37.5	EN	EN
Bromeliaceae	Vriesea	Vriesea macrochlamys	3605.2	32	11	5	4	3	EN	EN B1a+B2a	81.8	EN	EN
Bromeliaceae	Vriesea	Vriesea macrostachya	5956.2	16	5	4	4	1	EN	EN B2a	20	EN	VU
Bromeliaceae	Vriesea	Vriesea maculosa	68625.2	16	10	3	3	2	EN	EN B2a	90	EN	LC or NT
Bromeliaceae	Vriesea	Vriesea maguirei	520342	24	14	3	4	3	EN	EN B2a	92.9	EN	LC or NT
Bromeliaceae	Vriesea	Vriesea marnier-lapostollei	20869	56	15	8	11	3	LC or NT	LC or NT B1a+B2a	20	LC or NT	LC or NT
Bromeliaceae	Vriesea	Vriesea maxoniana	6.92721e+06	416	154	43	60	23	LC or NT	LC or NT B1a+B2a	52.6	LC or NT	LC or NT
Bromeliaceae	Vriesea	Vriesea menescalii	3092.2	44	17	3	9	1	VU	VU B1a+B2a	5.9	VU	VU
Bromeliaceae	Vriesea	Vriesea michaelii	NA	4	2	1	1	0	CR	CR B2a	0	CR	NA
Bromeliaceae	Vriesea	Vriesea minuta	14862.2	100	42	10	18	8	LC or NT	LC or NT B1a+B2a	50	LC or NT	LC or NT
Bromeliaceae	Vriesea	Vriesea minutiflora	9950.8	16	5	4	4	1	EN	EN B2a	40	EN	VU
Bromeliaceae	Vriesea	Vriesea modesta	633745	68	35	10	13	2	LC or NT	LC or NT B1a+B2a	5.7	LC or NT	LC or NT
Bromeliaceae	Vriesea	Vriesea mollis	22.7	12	4	1	3	2	EN	EN B1a+B2a	50	EN	EN
Bromeliaceae	Vriesea	Vriesea monacorum	NA	4	2	1	1	0	CR	CR B2a	0	CR	NA
Bromeliaceae	Vriesea	Vriesea montana	169803	180	62	10	32	15	LC or NT	LC or NT B1a+B2a	45.2	LC or NT	LC or NT
Bromeliaceae	Vriesea	Vriesea morrenii	41292.9	72	42	9	15	4	LC or NT	LC or NT B1a+B2a	26.2	LC or NT	LC or NT
Bromeliaceae	Vriesea	Vriesea muelleri	7138.8	24	9	5	6	0	VU	VU B1a+B2a	0	VU	VU
Bromeliaceae	Vriesea	Vriesea multifoliata	NA	4	1	1	1	0	CR	CR B2a	0	CR	NA
Bromeliaceae	Vriesea	Vriesea neoglutinosa	2.79061e+06	212	58	42	51	15	LC or NT	LC or NT B1a+B2a	29.3	LC or NT	LC or NT
Bromeliaceae	Vriesea	Vriesea noblickii	12230.8	40	23	5	8	2	VU	VU B1a+B2a	17.4	VU	VU
Bromeliaceae	Vriesea	Vriesea nocturna	6.07119e+06	340	116	32	50	16	LC or NT	LC or NT B1a+B2a	46.6	LC or NT	LC or NT
Bromeliaceae	Vriesea	Vriesea notata	25313.8	104	33	5	19	8	LC or NT	LC or NT B1a+B2a	45.5	LC or NT	LC or NT
Bromeliaceae	Vriesea	Vriesea nubicola	NA	4	2	1	1	0	CR	CR B2a	0	CR	NA
Bromeliaceae	Vriesea	Vriesea nutans	6.06583e+06	320	112	29	46	14	LC or NT	LC or NT B1a+B2a	47.3	LC or NT	LC or NT
Bromeliaceae	Vriesea	Vriesea ochracea	NA	4	1	1	1	0	CR	CR B2a	0	CR	NA
Bromeliaceae	Vriesea	Vriesea oligantha	8.78239e+06	640	243	54	101	31	LC or NT	LC or NT B1a+B2a	44.9	LC or NT	LC or NT
Bromeliaceae	Vriesea	Vriesea olmosana	2148.7	8	3	2	2	0	EN	EN B1a+B2a	0	EN	EN
Bromeliaceae	Vriesea	Vriesea orjuelae	NA	4	1	1	1	1	LC or NT	LC or NT B2a	100	CR	NA
Bromeliaceae	Vriesea	Vriesea ororiensis	125955	312	123	10	33	14	LC or NT	LC or NT B1a+B2a	74	LC or NT	LC or NT
Bromeliaceae	Vriesea	Vriesea osaensis	6185	64	22	5	10	5	VU	VU B1a+B2a	68.2	VU	VU
Bromeliaceae	Vriesea	Vriesea ospinae	511096	12	3	3	3	1	EN	EN B2a	33.3	EN	LC or NT
Bromeliaceae	Vriesea	Vriesea oxapampae	NA	4	1	1	1	0	CR	CR B2a	0	CR	NA
Bromeliaceae	Vriesea	Vriesea pabstii	104086	96	34	12	16	3	LC or NT	LC or NT B1a+B2a	41.2	LC or NT	LC or NT
Bromeliaceae	Vriesea	Vriesea panamaensis	206.5	16	7	2	2	2	LC or NT	EN B1a+B2a	100	EN	EN
Bromeliaceae	Vriesea	Vriesea paradoxa	6.06583e+06	308	108	26	43	14	LC or NT	LC or NT B1a+B2a	48.1	LC or NT	LC or NT
Bromeliaceae	Vriesea	Vriesea paraibica	638487	192	60	37	43	9	LC or NT	LC or NT B1a+B2a	28.3	LC or NT	LC or NT
Bromeliaceae	Vriesea	Vriesea paratiensis	275129	100	34	13	18	7	LC or NT	LC or NT B1a+B2a	41.2	LC or NT	LC or NT
Bromeliaceae	Vriesea	Vriesea pardalina	574291	84	32	15	16	8	LC or NT	LC or NT B1a+B2a	62.5	LC or NT	LC or NT
Bromeliaceae	Vriesea	Vriesea parviflora	11540.6	48	22	5	9	2	VU	VU B1a+B2a	9.1	VU	VU
Bromeliaceae	Vriesea	Vriesea pastuchoffiana	1159.5	8	3	2	2	0	EN	EN B1a+B2a	0	EN	EN
Bromeliaceae	Vriesea	Vriesea patula	171589	24	8	4	6	2	VU	VU B2a	25	VU	LC or NT
Bromeliaceae	Vriesea	Vriesea patzeltii	82291.9	120	33	10	19	5	LC or NT	LC or NT B1a+B2a	27.3	LC or NT	LC or NT
Bromeliaceae	Vriesea	Vriesea pauciflora	8	8	3	1	2	1	EN	EN B1a+B2a	33.3	EN	EN
Bromeliaceae	Vriesea	Vriesea paupera	107460	72	30	7	14	1	LC or NT	LC or NT B1a+B2a	10	LC or NT	LC or NT
Bromeliaceae	Vriesea	Vriesea pauperrima	460698	172	70	22	37	5	LC or NT	LC or NT B1a+B2a	20	LC or NT	LC or NT
Bromeliaceae	Vriesea	Vriesea pectinata	44592.7	76	32	8	10	2	VU	VU B2a	21.9	VU	LC or NT
Bromeliaceae	Vriesea	Vriesea pedicellata	67580.2	268	88	16	40	20	LC or NT	LC or NT B1a+B2a	63.6	LC or NT	LC or NT
Bromeliaceae	Vriesea	Vriesea penduliflora	6.07872e+06	368	136	32	53	16	LC or NT	LC or NT B1a+B2a	40.4	LC or NT	LC or NT
Bromeliaceae	Vriesea	Vriesea penduliscapa	45565.9	8	3	2	2	0	EN	EN B2a	0	EN	LC or NT
Bromeliaceae	Vriesea	Vriesea pereirae	6.45018e+06	336	119	28	49	15	LC or NT	LC or NT B1a+B2a	44.5	LC or NT	LC or NT
Bromeliaceae	Vriesea	Vriesea petraea	18.8	12	3	1	2	0	EN	EN B1a+B2a	0	EN	EN
Bromeliaceae	Vriesea	Vriesea philippocoburgii	1.03103e+07	1052	356	95	184	38	LC or NT	LC or NT B1a+B2a	34.6	LC or NT	LC or NT
Bromeliaceae	Vriesea	Vriesea picta	3219.9	28	7	3	5	3	EN	EN B1a+B2a	71.4	EN	EN
Bromeliaceae	Vriesea	Vriesea pinottii	7652.1	28	10	6	7	2	VU	VU B1a+B2a	30	VU	VU
Bromeliaceae	Vriesea	Vriesea piscatrix	8	8	3	2	2	0	EN	EN B1a+B2a	0	EN	EN
Bromeliaceae	Vriesea	Vriesea pittieri	22738.7	124	40	6	14	9	LC or NT	LC or NT B1a+B2a	77.5	LC or NT	LC or NT
Bromeliaceae	Vriesea	Vriesea platynema	1.36896e+07	1568	603	141	288	58	LC or NT	LC or NT B1a+B2a	32.2	LC or NT	LC or NT
Bromeliaceae	Vriesea	Vriesea platzmannii	68437.8	108	38	16	24	6	LC or NT	LC or NT B1a+B2a	23.7	LC or NT	LC or NT
Bromeliaceae	Vriesea	Vriesea pleiosticha	1.0938e+07	652	249	89	115	36	LC or NT	LC or NT B1a+B2a	37.3	LC or NT	LC or NT
Bromeliaceae	Vriesea	Vriesea plurifolia	2779.2	24	6	4	5	0	EN	EN B1a+B2a	0	EN	EN
Bromeliaceae	Vriesea	Vriesea poenulata	58881.6	180	69	19	36	13	LC or NT	LC or NT B1a+B2a	24.6	LC or NT	LC or NT
Bromeliaceae	Vriesea	Vriesea procera	6.98094e+06	1696	674	181	344	67	LC or NT	LC or NT B1a+B2a	25.2	LC or NT	LC or NT
Bromeliaceae	Vriesea	Vriesea proctorii	NA	4	1	1	1	1	LC or NT	LC or NT B2a	100	CR	NA
Bromeliaceae	Vriesea	Vriesea pseudoatra	119432	64	22	12	16	2	LC or NT	LC or NT B1a+B2a	13.6	LC or NT	LC or NT
Bromeliaceae	Vriesea	Vriesea psittacina	1.62955e+06	652	262	65	120	29	LC or NT	LC or NT B1a+B2a	35.1	LC or NT	LC or NT
Bromeliaceae	Vriesea	Vriesea pulchra	11776.4	28	7	4	6	2	VU	VU B1a+B2a	42.9	VU	VU
Bromeliaceae	Vriesea	Vriesea punctulata	89.8	12	3	2	3	2	EN	EN B1a+B2a	66.7	EN	EN
Bromeliaceae	Vriesea	Vriesea pycnantha	6.06583e+06	388	140	33	55	18	LC or NT	LC or NT B1a+B2a	51.4	LC or NT	LC or NT
Bromeliaceae	Vriesea	Vriesea racinae	11486.2	52	21	6	11	1	LC or NT	LC or NT B1a+B2a	4.8	LC or NT	LC or NT
Bromeliaceae	Vriesea	Vriesea rafaelii	113.7	12	4	2	3	0	EN	EN B1a+B2a	0	EN	EN
Bromeliaceae	Vriesea	Vriesea rastrensis	7889.8	28	12	3	6	0	VU	VU B1a+B2a	0	VU	VU
Bromeliaceae	Vriesea	Vriesea rectifolia	NA	4	2	1	1	0	CR	CR B2a	0	CR	NA
Bromeliaceae	Vriesea	Vriesea recurvata	5.13785e+06	68	29	15	16	5	LC or NT	LC or NT B1a+B2a	27.6	LC or NT	LC or NT
Bromeliaceae	Vriesea	Vriesea regnellii	666195	56	22	12	12	7	LC or NT	LC or NT B1a+B2a	59.1	LC or NT	LC or NT
Bromeliaceae	Vriesea	Vriesea reitzii	6.65582e+06	564	195	54	92	17	LC or NT	LC or NT B1a+B2a	30.8	LC or NT	LC or NT
Bromeliaceae	Vriesea	Vriesea repandostachys	11.5	8	4	1	2	0	EN	EN B1a+B2a	0	EN	EN
Bromeliaceae	Vriesea	Vriesea revoluta	4	4	3	1	1	0	CR	CR B1a	0	EN	CR
Bromeliaceae	Vriesea	Vriesea rhodostachys	52917.1	96	37	10	17	6	LC or NT	LC or NT B1a+B2a	32.4	LC or NT	LC or NT
Bromeliaceae	Vriesea	Vriesea ringens	2.41167e+06	168	48	33	38	14	LC or NT	LC or NT B1a+B2a	33.3	LC or NT	LC or NT
Bromeliaceae	Vriesea	Vriesea roberto-seidelii	3925.6	16	5	4	4	0	EN	EN B1a+B2a	0	EN	EN
Bromeliaceae	Vriesea	Vriesea robusta	236692	20	5	4	5	3	EN	EN B2a	60	EN	LC or NT
Bromeliaceae	Vriesea	Vriesea rodigasiana	1.57426e+06	892	342	60	159	28	LC or NT	LC or NT B1a+B2a	34.5	LC or NT	LC or NT
Bromeliaceae	Vriesea	Vriesea roethii	8	8	3	1	2	1	EN	EN B1a+B2a	33.3	EN	EN
Bromeliaceae	Vriesea	Vriesea rubens	6655786	344	119	31	50	16	LC or NT	LC or NT B1a+B2a	46.2	LC or NT	LC or NT
Bromeliaceae	Vriesea	Vriesea rubra	4.56178e+06	176	59	36	34	17	LC or NT	LC or NT B1a+B2a	64.4	LC or NT	LC or NT
Bromeliaceae	Vriesea	Vriesea rubyae	5723.5	36	12	5	8	5	VU	VU B1a+B2a	66.7	VU	VU
Bromeliaceae	Vriesea	Vriesea rugosa	609.5	12	4	3	4	1	EN	EN B1a+B2a	25	EN	EN
Bromeliaceae	Vriesea	Vriesea ruschii	172750	104	38	13	22	6	LC or NT	LC or NT B1a+B2a	26.3	LC or NT	LC or NT
Bromeliaceae	Vriesea	Vriesea sagasteguii	NA	4	1	1	1	0	CR	CR B2a	0	CR	NA
Bromeliaceae	Vriesea	Vriesea sanctateresensis	6.50521e+06	312	109	27	44	14	LC or NT	LC or NT B1a+B2a	47.7	LC or NT	LC or NT
Bromeliaceae	Vriesea	Vriesea sandrae	13443	32	9	7	6	2	VU	VU B1a+B2a	44.4	VU	VU
Bromeliaceae	Vriesea	Vriesea sanfranciscana	NA	4	1	1	1	0	CR	CR B2a	0	CR	NA
Bromeliaceae	Vriesea	Vriesea sanguinolenta	6.58775e+06	656	193	71	116	31	LC or NT	LC or NT B1a+B2a	24.9	LC or NT	LC or NT
Bromeliaceae	Vriesea	Vriesea santaleopoldinensis	451.4	12	7	3	3	0	EN	EN B1a+B2a	0	EN	EN
Bromeliaceae	Vriesea	Vriesea saundersiae	957595	32	8	5	6	1	VU	VU B2a	12.5	VU	LC or NT
Bromeliaceae	Vriesea	Vriesea sazimae	30629.1	76	28	13	15	6	LC or NT	LC or NT B1a+B2a	60.7	LC or NT	LC or NT
Bromeliaceae	Vriesea	Vriesea scalaris	1.20905e+06	668	275	65	137	25	LC or NT	LC or NT B1a+B2a	21.5	LC or NT	LC or NT
Bromeliaceae	Vriesea	Vriesea sceptrum	6.61337e+06	420	146	40	61	19	LC or NT	LC or NT B1a+B2a	47.9	LC or NT	LC or NT
Bromeliaceae	Vriesea	Vriesea schimperiana	NA	4	1	1	1	0	CR	CR B2a	0	CR	NA
Bromeliaceae	Vriesea	Vriesea schultesiana	20179.8	40	17	7	8	3	VU	VU B2a	41.2	VU	LC or NT
Bromeliaceae	Vriesea	Vriesea schunkei	8	8	3	2	2	0	EN	EN B1a+B2a	0	EN	EN
Bromeliaceae	Vriesea	Vriesea schwackeana	1.05888e+06	56	15	12	13	3	LC or NT	LC or NT B1a+B2a	20	LC or NT	LC or NT
Bromeliaceae	Vriesea	Vriesea secundiflora	172.6	20	6	2	4	2	EN	EN B1a+B2a	66.7	EN	EN
Bromeliaceae	Vriesea	Vriesea segadas-viannae	2295.1	20	8	4	5	2	EN	EN B1a+B2a	62.5	EN	EN
Bromeliaceae	Vriesea	Vriesea seideliana	3401.2	96	46	5	14	1	LC or NT	LC or NT B1a+B2a	2.2	LC or NT	LC or NT
Bromeliaceae	Vriesea	Vriesea serrana	8	8	3	1	1	1	LC or NT	CR B1a	100	EN	CR
Bromeliaceae	Vriesea	Vriesea serranegrensis	NA	4	2	1	1	1	LC or NT	LC or NT B2a	100	CR	NA
Bromeliaceae	Vriesea	Vriesea silvana	1004.9	8	3	2	2	0	EN	EN B1a+B2a	0	EN	EN
Bromeliaceae	Vriesea	Vriesea simplex	5.51818e+06	612	256	59	113	36	LC or NT	LC or NT B1a+B2a	37.9	LC or NT	LC or NT
Bromeliaceae	Vriesea	Vriesea sincorana	146144	12	3	3	3	1	EN	EN B2a	33.3	EN	LC or NT
Bromeliaceae	Vriesea	Vriesea singularis	NA	4	1	1	1	1	LC or NT	LC or NT B2a	100	CR	NA
Bromeliaceae	Vriesea	Vriesea singuliflora	4513.9	24	7	5	6	2	VU	VU B1a+B2a	28.6	VU	VU
Bromeliaceae	Vriesea	Vriesea sintenisii	24463.3	40	10	6	7	5	VU	VU B2a	70	VU	LC or NT
Bromeliaceae	Vriesea	Vriesea soderstromii	14709.2	12	3	3	3	1	EN	EN B2a	33.3	EN	VU
Bromeliaceae	Vriesea	Vriesea sparsiflora	207626	40	14	7	8	2	VU	VU B2a	14.3	VU	LC or NT
Bromeliaceae	Vriesea	Vriesea speckmaieri	NA	4	1	1	1	1	LC or NT	LC or NT B2a	100	CR	NA
Bromeliaceae	Vriesea	Vriesea splendens	5.26228e+06	176	57	29	31	6	LC or NT	LC or NT B1a+B2a	42.1	LC or NT	LC or NT
Bromeliaceae	Vriesea	Vriesea stenophylla	31800.6	60	17	9	14	5	LC or NT	LC or NT B1a+B2a	35.3	LC or NT	LC or NT
Bromeliaceae	Vriesea	Vriesea stricta	4622.9	52	19	6	11	3	LC or NT	LC or NT B1a+B2a	31.6	LC or NT	LC or NT
Bromeliaceae	Vriesea	Vriesea strobeliae	NA	4	1	1	1	0	CR	CR B2a	0	CR	NA
Bromeliaceae	Vriesea	Vriesea subandina	8721.9	12	5	3	3	0	EN	EN B2a	0	EN	VU
Bromeliaceae	Vriesea	Vriesea subsecunda	51028.4	84	28	7	17	9	LC or NT	LC or NT B1a+B2a	50	LC or NT	LC or NT
Bromeliaceae	Vriesea	Vriesea sucrei	117420	28	12	5	7	1	VU	VU B2a	8.3	VU	LC or NT
Bromeliaceae	Vriesea	Vriesea sulcata	51385.8	24	8	5	5	4	EN	EN B2a	87.5	EN	LC or NT
Bromeliaceae	Vriesea	Vriesea taritubensis	97774.5	92	34	13	21	9	LC or NT	LC or NT B1a+B2a	50	LC or NT	LC or NT
Bromeliaceae	Vriesea	Vriesea tarmaensis	NA	4	1	1	1	0	CR	CR B2a	0	CR	NA
Bromeliaceae	Vriesea	Vriesea tequendamae	7.9024e+06	408	137	42	64	25	LC or NT	LC or NT B1a+B2a	48.9	LC or NT	LC or NT
Bromeliaceae	Vriesea	Vriesea teresopolitana	37284.3	28	9	5	6	3	VU	VU B2a	33.3	VU	LC or NT
Bromeliaceae	Vriesea	Vriesea thyrsoidea	56415	36	21	3	6	3	VU	VU B2a	61.9	VU	LC or NT
Bromeliaceae	Vriesea	Vriesea tijucana	555022	296	100	30	49	18	LC or NT	LC or NT B1a+B2a	51	LC or NT	LC or NT
Bromeliaceae	Vriesea	Vriesea tillandsioides	NA	4	1	1	1	0	CR	CR B2a	0	CR	NA
Bromeliaceae	Vriesea	Vriesea tiquirensis	16	16	7	1	3	1	EN	EN B1a+B2a	14.3	EN	EN
Bromeliaceae	Vriesea	Vriesea tonduziana	9824.4	112	33	7	22	7	LC or NT	LC or NT B1a+B2a	33.3	LC or NT	LC or NT
Bromeliaceae	Vriesea	Vriesea triangularis	1460.1	12	4	3	3	0	EN	EN B1a+B2a	0	EN	EN
Bromeliaceae	Vriesea	Vriesea triflora	15551	56	20	5	10	6	VU	VU B1a+B2a	75	VU	VU
Bromeliaceae	Vriesea	Vriesea triligulata	144670	72	25	8	15	5	LC or NT	LC or NT B1a+B2a	28	LC or NT	LC or NT
Bromeliaceae	Vriesea	Vriesea umbrosa	70685	108	41	18	19	10	LC or NT	LC or NT B1a+B2a	68.3	LC or NT	LC or NT
Bromeliaceae	Vriesea	Vriesea unilateralis	2.22071e+06	392	156	45	65	18	LC or NT	LC or NT B1a+B2a	37.2	LC or NT	LC or NT
Bromeliaceae	Vriesea	Vriesea uxoris	211.2	24	8	2	4	2	EN	EN B1a+B2a	75	EN	EN
Bromeliaceae	Vriesea	Vriesea vagans	8.8823e+06	1300	542	94	223	47	LC or NT	LC or NT B1a+B2a	37.1	LC or NT	LC or NT
Bromeliaceae	Vriesea	Vriesea vanhyningii	6077702	452	158	35	60	17	LC or NT	LC or NT B1a+B2a	43.7	LC or NT	LC or NT
Bromeliaceae	Vriesea	Vriesea vellozicola	20973.4	92	46	12	19	0	LC or NT	LC or NT B1a+B2a	0	LC or NT	LC or NT
Bromeliaceae	Vriesea	Vriesea verrucosa	NA	4	1	1	1	0	CR	CR B2a	0	CR	NA
Bromeliaceae	Vriesea	Vriesea vexillata	NA	8	2	2	1	1	LC or NT	LC or NT B2a	100	CR	NA
Bromeliaceae	Vriesea	Vriesea vidalii	468.5	16	5	2	4	1	EN	EN B1a+B2a	40	EN	EN
Bromeliaceae	Vriesea	Vriesea vietoris	793.6	20	7	3	5	3	EN	EN B1a+B2a	57.1	EN	EN
Bromeliaceae	Vriesea	Vriesea viridiflora	7.19289e+06	456	147	58	82	34	LC or NT	LC or NT B1a+B2a	48.3	LC or NT	LC or NT
Bromeliaceae	Vriesea	Vriesea viridis	5622	48	15	4	9	4	VU	VU B1a+B2a	46.7	VU	VU
Bromeliaceae	Vriesea	Vriesea vittata	6.11741e+06	504	166	49	73	29	LC or NT	LC or NT B1a+B2a	52.4	LC or NT	LC or NT
Bromeliaceae	Vriesea	Vriesea vulcanicola	8	8	5	1	1	1	LC or NT	CR B1a	100	EN	CR
Bromeliaceae	Vriesea	Vriesea vulpinoidea	7245.3	20	5	3	5	1	EN	EN B2a	20	EN	VU
Bromeliaceae	Vriesea	Vriesea wawrana	700840	88	34	16	19	7	LC or NT	LC or NT B1a+B2a	32.4	LC or NT	LC or NT
Bromeliaceae	Vriesea	Vriesea weberi	8	8	4	2	2	0	EN	EN B1a+B2a	0	EN	EN
Bromeliaceae	Vriesea	Vriesea werckleana	6.47904e+06	752	271	66	124	44	LC or NT	LC or NT B1a+B2a	42.8	LC or NT	LC or NT
Bromeliaceae	Vriesea	Vriesea williamsii	15558.1	100	39	6	15	9	LC or NT	LC or NT B1a+B2a	74.4	LC or NT	LC or NT
Bromeliaceae	Vriesea	Vriesea woodsoniana	NA	4	1	1	1	0	CR	CR B2a	0	CR	NA
Bromeliaceae	Vriesea	Vriesea wuelfinghoffii	102.8	12	4	2	3	0	EN	EN B1a+B2a	0	EN	EN
Bromeliaceae	Vriesea	Vriesea zamorensis	72838.1	112	55	8	19	4	LC or NT	LC or NT B1a+B2a	18.2	LC or NT	LC or NT
Bromeliaceae	Vriesea	Vriesea zonata	NA	4	2	1	1	0	CR	CR B2a	0	CR	NA
Bromeliaceae	Werauhia	Werauhia anitana	NA	4	1	1	1	0	CR	CR B2a	0	CR	NA
Bromeliaceae	Werauhia	Werauhia dalstroemii	NA	4	2	1	1	0	CR	CR B2a	0	CR	NA
Bromeliaceae	Werauhia	Werauhia jenii	NA	4	1	1	1	1	LC or NT	LC or NT B2a	100	CR	NA
Bromeliaceae	Werauhia	Werauhia luctuosa	NA	4	1	1	1	1	LC or NT	LC or NT B2a	100	CR	NA
Bromeliaceae	Werauhia	Werauhia lutheri	1271.2	24	9	2	3	3	LC or NT	EN B1a+B2a	100	EN	EN
Bromeliaceae	Werauhia	Werauhia millennia	10895.2	20	7	4	4	3	EN	EN B2a	85.7	EN	VU
Bromeliaceae	Werauhia	Werauhia moralesii	12	12	4	1	2	0	EN	EN B1a+B2a	0	EN	EN
Bromeliaceae	Werauhia	Werauhia noctiflorens	6.06583e+06	324	113	29	46	15	LC or NT	LC or NT B1a+B2a	48.7	LC or NT	LC or NT
Bromeliaceae	Werauhia	Werauhia rauhii	NA	4	1	1	1	0	CR	CR B2a	0	CR	NA
Bromeliaceae	Wittmackia	Wittmackia abbreviata	NA	4	1	1	1	1	LC or NT	LC or NT B2a	100	CR	NA
Bromeliaceae	Wittmackia	Wittmackia altocaririensis	13956	12	3	3	3	2	EN	EN B2a	66.7	EN	VU
Bromeliaceae	Wittmackia	Wittmackia amorimii	3164.2	24	7	3	5	3	EN	EN B1a+B2a	57.1	EN	EN
Bromeliaceae	Wittmackia	Wittmackia andersoniana	24.3	8	3	2	2	1	EN	EN B1a+B2a	66.7	EN	EN
Bromeliaceae	Wittmackia	Wittmackia antillana	203.1	12	3	3	3	0	EN	EN B1a+B2a	0	EN	EN
Bromeliaceae	Wittmackia	Wittmackia burle-marxii	NA	4	1	1	1	0	CR	CR B2a	0	CR	NA
Bromeliaceae	Wittmackia	Wittmackia carvalhoi	NA	4	1	1	1	1	LC or NT	LC or NT B2a	100	CR	NA
Bromeliaceae	Wittmackia	Wittmackia caymanensis	NA	4	1	1	1	0	CR	CR B2a	0	CR	NA
Bromeliaceae	Wittmackia	Wittmackia distans	NA	4	1	1	1	0	CR	CR B2a	0	CR	NA
Bromeliaceae	Wittmackia	Wittmackia eriostachya	NA	4	1	1	1	0	CR	CR B2a	0	CR	NA
Bromeliaceae	Wittmackia	Wittmackia fawcettii	NA	4	1	1	1	1	LC or NT	LC or NT B2a	100	CR	NA
Bromeliaceae	Wittmackia	Wittmackia froesii	122078	52	15	8	13	5	LC or NT	LC or NT B1a+B2a	40	LC or NT	LC or NT
Bromeliaceae	Wittmackia	Wittmackia gregaria	NA	4	1	1	1	0	CR	CR B2a	0	CR	NA
Bromeliaceae	Wittmackia	Wittmackia inermis	NA	4	1	1	1	0	CR	CR B2a	0	CR	NA
Bromeliaceae	Wittmackia	Wittmackia ituberaensis	NA	4	1	1	1	0	CR	CR B2a	0	CR	NA
Bromeliaceae	Wittmackia	Wittmackia jamaicana	NA	4	1	1	1	0	CR	CR B2a	0	CR	NA
Bromeliaceae	Wittmackia	Wittmackia laesslei	NA	4	1	1	1	1	LC or NT	LC or NT B2a	100	CR	NA
Bromeliaceae	Wittmackia	Wittmackia laevigata	NA	4	1	1	1	0	CR	CR B2a	0	CR	NA
Bromeliaceae	Wittmackia	Wittmackia limae	NA	4	1	1	1	0	CR	CR B2a	0	CR	NA
Bromeliaceae	Wittmackia	Wittmackia linharesiorum	NA	8	2	2	2	0	EN	EN B2a	0	EN	NA
Bromeliaceae	Wittmackia	Wittmackia maranguapensis	NA	4	2	1	1	0	CR	CR B2a	0	CR	NA
Bromeliaceae	Wittmackia	Wittmackia mesoamericana	NA	4	1	1	1	0	CR	CR B2a	0	CR	NA
Bromeliaceae	Wittmackia	Wittmackia negrilensis	NA	4	1	1	1	0	CR	CR B2a	0	CR	NA
Bromeliaceae	Wittmackia	Wittmackia neoregelioides	NA	4	1	1	1	1	LC or NT	LC or NT B2a	100	CR	NA
Bromeliaceae	Wittmackia	Wittmackia pendulispica	NA	8	2	2	2	1	EN	EN B2a	50	EN	NA
Bromeliaceae	Wittmackia	Wittmackia pernambucentris	NA	8	2	2	2	0	EN	EN B2a	0	EN	NA
Bromeliaceae	Wittmackia	Wittmackia portoricensis	914.1	16	4	4	4	4	LC or NT	EN B1a+B2a	100	EN	EN
Bromeliaceae	Wittmackia	Wittmackia silvana	NA	4	1	1	1	1	LC or NT	LC or NT B2a	100	CR	NA
Bromeliaceae	Wittmackia	Wittmackia spinulosa	NA	4	1	1	1	0	CR	CR B2a	0	CR	NA
Bromeliaceae	Wittmackia	Wittmackia sulbahianensis	4509.1	24	6	5	6	2	VU	VU B1a+B2a	33.3	VU	VU
Bromeliaceae	Wittmackia	Wittmackia tentaculifera	NA	4	1	1	1	0	CR	CR B2a	0	CR	NA
Bromeliaceae	Wittmackia	Wittmackia turbinocalyx	31045.5	68	20	11	14	7	LC or NT	LC or NT B1a+B2a	60	LC or NT	LC or NT
Bromeliaceae	Wittmackia	Wittmackia urbaniana	NA	8	2	2	2	0	EN	EN B2a	0	EN	NA
Bromeliaceae	Wittmackia	Wittmackia viridostigma	NA	8	2	2	2	1	EN	EN B2a	50	EN	NA
Polypodiaceae	Aglaomorpha	Aglaomorpha rigidula	NA	4	1	1	1	1	LC or NT	LC or NT B2a	100	CR	NA
Polypodiaceae	Alansmia	Alansmia alfaroi	1.11301e+06	144	42	16	23	10	LC or NT	LC or NT B1a+B2a	66.7	LC or NT	LC or NT
Polypodiaceae	Alansmia	Alansmia bradeana	935395	20	9	4	4	2	EN	EN B2a	77.8	EN	LC or NT
Polypodiaceae	Alansmia	Alansmia concinna	NA	4	1	1	1	1	LC or NT	LC or NT B2a	100	CR	NA
Polypodiaceae	Alansmia	Alansmia contacta	30935.1	16	5	4	4	1	EN	EN B2a	40	EN	LC or NT
Polypodiaceae	Alansmia	Alansmia cultrata	1.06154e+07	1192	397	134	194	67	LC or NT	LC or NT B1a+B2a	52.1	LC or NT	LC or NT
Polypodiaceae	Alansmia	Alansmia dependens	2.60924e+06	60	16	10	12	3	LC or NT	LC or NT B1a+B2a	31.2	LC or NT	LC or NT
Polypodiaceae	Alansmia	Alansmia diaphana	63496.8	68	46	8	8	3	VU	VU B2a	80.4	VU	LC or NT
Polypodiaceae	Alansmia	Alansmia elastica	1.12995e+07	664	222	88	109	43	LC or NT	LC or NT B1a+B2a	50.9	LC or NT	LC or NT
Polypodiaceae	Alansmia	Alansmia heteromorpha	3.12151e+06	376	112	44	58	24	LC or NT	LC or NT B1a+B2a	62.5	LC or NT	LC or NT
Polypodiaceae	Alansmia	Alansmia immixta	128396	40	37	6	5	3	EN	EN B2a	94.6	EN	LC or NT
Polypodiaceae	Alansmia	Alansmia lanigera	3.11506e+06	700	222	80	114	46	LC or NT	LC or NT B1a+B2a	57.7	LC or NT	LC or NT
Polypodiaceae	Alansmia	Alansmia laxa	6.97161e+06	456	170	46	71	21	LC or NT	LC or NT B1a+B2a	50.6	LC or NT	LC or NT
Polypodiaceae	Alansmia	Alansmia longa	1.36154e+06	176	56	23	31	9	LC or NT	LC or NT B1a+B2a	39.3	LC or NT	LC or NT
Polypodiaceae	Alansmia	Alansmia monosora	NA	8	2	2	2	1	EN	EN B2a	50	EN	NA
Polypodiaceae	Alansmia	Alansmia reclinata	8.6447e+06	1016	452	87	163	46	LC or NT	LC or NT B1a+B2a	48.7	LC or NT	LC or NT
Polypodiaceae	Alansmia	Alansmia semilunaris	2516.8	8	3	2	2	1	EN	EN B1a+B2a	33.3	EN	EN
Polypodiaceae	Alansmia	Alansmia senilis	9.48792e+06	916	327	95	132	49	LC or NT	LC or NT B1a+B2a	57.2	LC or NT	LC or NT
Polypodiaceae	Alansmia	Alansmia smithii	2.08584e+06	140	59	26	25	14	LC or NT	LC or NT B1a+B2a	76.3	LC or NT	LC or NT
Polypodiaceae	Alansmia	Alansmia spathulata	190938	112	35	9	16	10	LC or NT	LC or NT B1a+B2a	77.1	LC or NT	LC or NT
Polypodiaceae	Alansmia	Alansmia stella	6.39228e+06	700	233	63	107	35	LC or NT	LC or NT B1a+B2a	52.4	LC or NT	LC or NT
Polypodiaceae	Alansmia	Alansmia turrialbae	10022.5	156	60	8	16	7	LC or NT	LC or NT B1a+B2a	61.7	LC or NT	LC or NT
Polypodiaceae	Alansmia	Alansmia variabilis	2.24679e+06	56	17	10	13	5	LC or NT	LC or NT B1a+B2a	41.2	LC or NT	LC or NT
Polypodiaceae	Alansmia	Alansmia xanthotrichia	507535	44	12	6	8	5	VU	VU B2a	75	VU	LC or NT
Polypodiaceae	Archigrammitis	Archigrammitis tahitensis	340891	16	4	4	4	1	EN	EN B2a	25	EN	LC or NT
Polypodiaceae	Ascogrammitis	Ascogrammitis alan-smithii	26821.2	64	26	10	14	5	LC or NT	LC or NT B1a+B2a	42.3	LC or NT	LC or NT
Polypodiaceae	Ascogrammitis	Ascogrammitis anfractuosa	1.07667e+07	1152	464	117	185	66	LC or NT	LC or NT B1a+B2a	48.1	LC or NT	LC or NT
Polypodiaceae	Ascogrammitis	Ascogrammitis angustipes	6340.8	24	7	4	5	3	EN	EN B2a	71.4	EN	VU
Polypodiaceae	Ascogrammitis	Ascogrammitis athyrioides	350416	108	62	14	16	5	LC or NT	LC or NT B1a+B2a	79	LC or NT	LC or NT
Polypodiaceae	Ascogrammitis	Ascogrammitis clathrata	6.06583e+06	312	110	27	44	14	LC or NT	LC or NT B1a+B2a	47.3	LC or NT	LC or NT
Polypodiaceae	Ascogrammitis	Ascogrammitis clavigera	577.6	24	7	3	3	3	LC or NT	EN B1a+B2a	100	EN	EN
Polypodiaceae	Ascogrammitis	Ascogrammitis colombiensis	200.8	16	8	2	3	2	EN	EN B1a+B2a	87.5	EN	EN
Polypodiaceae	Ascogrammitis	Ascogrammitis cuencana	39154.2	20	5	5	5	1	EN	EN B2a	20	EN	LC or NT
Polypodiaceae	Ascogrammitis	Ascogrammitis david-smithii	177412	112	42	16	18	5	LC or NT	LC or NT B1a+B2a	64.3	LC or NT	LC or NT
Polypodiaceae	Ascogrammitis	Ascogrammitis dilatata	15937.3	44	22	4	9	5	VU	VU B1a+B2a	36.4	VU	VU
Polypodiaceae	Ascogrammitis	Ascogrammitis lehnertii	NA	8	2	2	2	1	EN	EN B2a	50	EN	NA
Polypodiaceae	Ascogrammitis	Ascogrammitis loxensis	57779.6	36	16	6	9	3	VU	VU B2a	43.8	VU	LC or NT
Polypodiaceae	Ascogrammitis	Ascogrammitis oxapampensis	11212.3	24	13	5	5	2	EN	EN B2a	53.8	EN	VU
Polypodiaceae	Ascogrammitis	Ascogrammitis pichinchae	202296	180	50	24	34	11	LC or NT	LC or NT B1a+B2a	40	LC or NT	LC or NT
Polypodiaceae	Ascogrammitis	Ascogrammitis pichinchensis	515255	52	17	10	12	2	LC or NT	LC or NT B1a+B2a	17.6	LC or NT	LC or NT
Polypodiaceae	Ascogrammitis	Ascogrammitis stuebelii	NA	4	1	1	1	1	LC or NT	LC or NT B2a	100	CR	NA
Polypodiaceae	Ascogrammitis	Ascogrammitis tungurahuae	NA	4	1	1	1	0	CR	CR B2a	0	CR	NA
Polypodiaceae	Campyloneurum	Campyloneurum abruptum	8224476	276	114	55	60	14	LC or NT	LC or NT B1a+B2a	39.5	LC or NT	LC or NT
Polypodiaceae	Campyloneurum	Campyloneurum acrocarpon	1.01217e+07	880	321	108	169	36	LC or NT	LC or NT B1a+B2a	30.8	LC or NT	LC or NT
Polypodiaceae	Campyloneurum	Campyloneurum aglaolepis	8.13684e+06	872	343	109	149	35	LC or NT	LC or NT B1a+B2a	45.2	LC or NT	LC or NT
Polypodiaceae	Campyloneurum	Campyloneurum amazonense	147303	24	6	5	6	1	VU	VU B2a	16.7	VU	LC or NT
Polypodiaceae	Campyloneurum	Campyloneurum amphostenon	1.04162e+07	3064	1083	246	462	127	LC or NT	LC or NT B1a+B2a	46.4	LC or NT	LC or NT
Polypodiaceae	Campyloneurum	Campyloneurum anetioides	31512	64	21	11	14	2	LC or NT	LC or NT B1a+B2a	14.3	LC or NT	LC or NT
Polypodiaceae	Campyloneurum	Campyloneurum angustifolium	1.60756e+07	7368	2586	587	1203	252	LC or NT	LC or NT B1a+B2a	34.3	LC or NT	LC or NT
Polypodiaceae	Campyloneurum	Campyloneurum angustipaleatum	3.7777e+06	448	148	72	84	23	LC or NT	LC or NT B1a+B2a	41.9	LC or NT	LC or NT
Polypodiaceae	Campyloneurum	Campyloneurum aphanophlebium	11266841	1612	603	213	304	87	LC or NT	LC or NT B1a+B2a	44.4	LC or NT	LC or NT
Polypodiaceae	Campyloneurum	Campyloneurum asplundii	8.03689e+06	772	294	74	117	33	LC or NT	LC or NT B1a+B2a	43.5	LC or NT	LC or NT
Polypodiaceae	Campyloneurum	Campyloneurum atlanticum	1078498	860	343	96	162	38	LC or NT	LC or NT B1a+B2a	32.9	LC or NT	LC or NT
Polypodiaceae	Campyloneurum	Campyloneurum austrobrasilianum	9.65456e+06	1924	791	177	357	58	LC or NT	LC or NT B1a+B2a	28.2	LC or NT	LC or NT
Polypodiaceae	Campyloneurum	Campyloneurum brevifolium	1.25325e+07	1696	514	239	324	101	LC or NT	LC or NT B1a+B2a	42.4	LC or NT	LC or NT
Polypodiaceae	Campyloneurum	Campyloneurum centrobrasilianum	3.31102e+06	200	89	33	39	12	LC or NT	LC or NT B1a+B2a	44.9	LC or NT	LC or NT
Polypodiaceae	Campyloneurum	Campyloneurum chlorolepis	8.22527e+06	636	231	81	115	30	LC or NT	LC or NT B1a+B2a	38.5	LC or NT	LC or NT
Polypodiaceae	Campyloneurum	Campyloneurum chrysopodum	2.99921e+06	96	26	12	18	5	LC or NT	LC or NT B1a+B2a	46.2	LC or NT	LC or NT
Polypodiaceae	Campyloneurum	Campyloneurum coarctatum	9.82112e+06	588	203	82	103	33	LC or NT	LC or NT B1a+B2a	41.4	LC or NT	LC or NT
Polypodiaceae	Campyloneurum	Campyloneurum cochense	1.06557e+06	400	133	37	71	17	LC or NT	LC or NT B1a+B2a	29.3	LC or NT	LC or NT
Polypodiaceae	Campyloneurum	Campyloneurum costatum	7.6113e+06	476	135	81	99	40	LC or NT	LC or NT B1a+B2a	50.4	LC or NT	LC or NT
Polypodiaceae	Campyloneurum	Campyloneurum decurrens	10472933	584	258	83	120	28	LC or NT	LC or NT B1a+B2a	41.1	LC or NT	LC or NT
Polypodiaceae	Campyloneurum	Campyloneurum densifolium	3852446	644	184	75	125	32	LC or NT	LC or NT B1a+B2a	33.2	LC or NT	LC or NT
Polypodiaceae	Campyloneurum	Campyloneurum ensifolium	3.34424e+06	292	91	54	62	19	LC or NT	LC or NT B1a+B2a	35.2	LC or NT	LC or NT
Polypodiaceae	Campyloneurum	Campyloneurum falcoideum	816813	140	48	9	18	5	LC or NT	LC or NT B1a+B2a	58.3	LC or NT	LC or NT
Polypodiaceae	Campyloneurum	Campyloneurum fuscosquamatum	1.19399e+07	860	321	127	149	41	LC or NT	LC or NT B1a+B2a	40.8	LC or NT	LC or NT
Polypodiaceae	Campyloneurum	Campyloneurum gracile	64036	104	32	16	22	8	LC or NT	LC or NT B1a+B2a	34.4	LC or NT	LC or NT
Polypodiaceae	Campyloneurum	Campyloneurum inflatum	49453.5	16	5	3	4	0	EN	EN B2a	0	EN	LC or NT
Polypodiaceae	Campyloneurum	Campyloneurum lorentzii	997216	140	45	25	28	8	LC or NT	LC or NT B1a+B2a	40	LC or NT	LC or NT
Polypodiaceae	Campyloneurum	Campyloneurum macrosorum	154114	40	10	9	9	4	VU	VU B2a	50	VU	LC or NT
Polypodiaceae	Campyloneurum	Campyloneurum magnificum	3.33869e+06	180	59	35	38	7	LC or NT	LC or NT B1a+B2a	18.6	LC or NT	LC or NT
Polypodiaceae	Campyloneurum	Campyloneurum major	2.36261e+06	604	226	78	120	35	LC or NT	LC or NT B1a+B2a	39.4	LC or NT	LC or NT
Polypodiaceae	Campyloneurum	Campyloneurum nitidissimum	6.85199e+06	536	190	74	95	27	LC or NT	LC or NT B1a+B2a	41.6	LC or NT	LC or NT
Polypodiaceae	Campyloneurum	Campyloneurum nitidum	9.87609e+06	4488	1976	329	804	121	LC or NT	LC or NT B1a+B2a	29.5	LC or NT	LC or NT
Polypodiaceae	Campyloneurum	Campyloneurum oellgaardii	NA	4	1	1	1	0	CR	CR B2a	0	CR	NA
Polypodiaceae	Campyloneurum	Campyloneurum ophiocaulon	8.98211e+06	1112	390	118	188	51	LC or NT	LC or NT B1a+B2a	39.7	LC or NT	LC or NT
Polypodiaceae	Campyloneurum	Campyloneurum oxypholis	NA	4	2	1	2	1	EN	EN B2a	50	EN	NA
Polypodiaceae	Campyloneurum	Campyloneurum pascoense	889249	196	66	27	38	7	LC or NT	LC or NT B1a+B2a	31.8	LC or NT	LC or NT
Polypodiaceae	Campyloneurum	Campyloneurum pentaphyllum	NA	4	1	1	1	0	CR	CR B2a	0	CR	NA
Polypodiaceae	Campyloneurum	Campyloneurum phyllitidis	15570755	5672	1978	789	1090	238	LC or NT	LC or NT B1a+B2a	32.8	LC or NT	LC or NT
Polypodiaceae	Campyloneurum	Campyloneurum poloense	NA	4	1	1	1	0	CR	CR B2a	0	CR	NA
Polypodiaceae	Campyloneurum	Campyloneurum repens	1.49184e+07	5020	1739	667	923	225	LC or NT	LC or NT B1a+B2a	36.5	LC or NT	LC or NT
Polypodiaceae	Campyloneurum	Campyloneurum rigidum	1.1299e+07	1204	463	135	214	59	LC or NT	LC or NT B1a+B2a	37.6	LC or NT	LC or NT
Polypodiaceae	Campyloneurum	Campyloneurum serpentinum	6.26878e+06	256	69	49	55	20	LC or NT	LC or NT B1a+B2a	37.7	LC or NT	LC or NT
Polypodiaceae	Campyloneurum	Campyloneurum solutum	8.55949e+06	816	267	78	122	33	LC or NT	LC or NT B1a+B2a	47.6	LC or NT	LC or NT
Polypodiaceae	Campyloneurum	Campyloneurum sphenoides	6.37057e+06	1008	413	90	159	40	LC or NT	LC or NT B1a+B2a	37.8	LC or NT	LC or NT
Polypodiaceae	Campyloneurum	Campyloneurum sublucidum	1.68622e+06	64	23	11	14	3	LC or NT	LC or NT B1a+B2a	13	LC or NT	LC or NT
Polypodiaceae	Campyloneurum	Campyloneurum tenuipes	6.39866e+06	916	409	76	127	35	LC or NT	LC or NT B1a+B2a	59.7	LC or NT	LC or NT
Polypodiaceae	Campyloneurum	Campyloneurum tucumanense	840190	92	31	15	15	6	LC or NT	LC or NT B1a+B2a	54.8	LC or NT	LC or NT
Polypodiaceae	Campyloneurum	Campyloneurum vexatum	497734	252	75	29	48	12	LC or NT	LC or NT B1a+B2a	33.3	LC or NT	LC or NT
Polypodiaceae	Campyloneurum	Campyloneurum vulpinum	9.80272e+06	476	172	53	74	23	LC or NT	LC or NT B1a+B2a	45.3	LC or NT	LC or NT
Polypodiaceae	Campyloneurum	Campyloneurum wacketii	165648	48	21	9	12	4	LC or NT	LC or NT B1a+B2a	19	LC or NT	LC or NT
Polypodiaceae	Campyloneurum	Campyloneurum wurdackii	11011.5	12	3	3	3	1	EN	EN B2a	33.3	EN	VU
Polypodiaceae	Campyloneurum	Campyloneurum xalapense	6.9406e+06	1480	521	115	223	54	LC or NT	LC or NT B1a+B2a	42.2	LC or NT	LC or NT
Polypodiaceae	Ceradenia	Ceradenia albidula	7.04564e+06	616	241	58	95	30	LC or NT	LC or NT B1a+B2a	50.6	LC or NT	LC or NT
Polypodiaceae	Ceradenia	Ceradenia arthrothrix	NA	4	1	1	1	1	LC or NT	LC or NT B2a	100	CR	NA
Polypodiaceae	Ceradenia	Ceradenia aulaeifolia	3059.5	32	16	4	5	4	EN	EN B1a+B2a	81.2	EN	EN
Polypodiaceae	Ceradenia	Ceradenia ayopayana	7643.3	12	5	3	3	2	EN	EN B2a	60	EN	VU
Polypodiaceae	Ceradenia	Ceradenia barbatula	2.72128e+06	56	14	11	12	6	LC or NT	LC or NT B1a+B2a	57.1	LC or NT	LC or NT
Polypodiaceae	Ceradenia	Ceradenia bishopii	40591.2	64	32	7	8	4	VU	VU B2a	68.8	VU	LC or NT
Polypodiaceae	Ceradenia	Ceradenia brunneoviridis	3226.6	44	13	3	6	3	VU	VU B1a+B2a	76.9	VU	VU
Polypodiaceae	Ceradenia	Ceradenia capillaris	7.30162e+06	176	68	26	30	13	LC or NT	LC or NT B1a+B2a	54.4	LC or NT	LC or NT
Polypodiaceae	Ceradenia	Ceradenia clavipila	90030.1	112	55	10	15	7	LC or NT	LC or NT B1a+B2a	61.8	LC or NT	LC or NT
Polypodiaceae	Ceradenia	Ceradenia comosa	600.3	24	14	3	3	2	EN	EN B1a+B2a	78.6	EN	EN
Polypodiaceae	Ceradenia	Ceradenia curvata	1.05208e+07	392	135	35	55	19	LC or NT	LC or NT B1a+B2a	49.6	LC or NT	LC or NT
Polypodiaceae	Ceradenia	Ceradenia dendrodoxa	104339	12	3	3	3	0	EN	EN B2a	0	EN	LC or NT
Polypodiaceae	Ceradenia	Ceradenia discolor	2.89771e+06	60	15	14	13	9	LC or NT	LC or NT B1a+B2a	73.3	LC or NT	LC or NT
Polypodiaceae	Ceradenia	Ceradenia farinosa	209922	40	17	7	7	3	VU	VU B2a	76.5	VU	LC or NT
Polypodiaceae	Ceradenia	Ceradenia fendleri	249853	12	4	3	3	2	EN	EN B2a	50	EN	LC or NT
Polypodiaceae	Ceradenia	Ceradenia fragillima	NA	8	2	2	2	0	EN	EN B2a	0	EN	NA
Polypodiaceae	Ceradenia	Ceradenia fucoides	8821.7	160	61	4	12	4	LC or NT	LC or NT B1a+B2a	78.7	LC or NT	LC or NT
Polypodiaceae	Ceradenia	Ceradenia glabra	42937.7	20	9	5	5	3	EN	EN B2a	66.7	EN	LC or NT
Polypodiaceae	Ceradenia	Ceradenia glaziovii	465087	16	5	4	4	3	EN	EN B2a	80	EN	LC or NT
Polypodiaceae	Ceradenia	Ceradenia herrerae	NA	8	2	2	2	1	EN	EN B2a	50	EN	NA
Polypodiaceae	Ceradenia	Ceradenia intonsa	1.61382e+06	68	20	16	15	9	LC or NT	LC or NT B1a+B2a	60	LC or NT	LC or NT
Polypodiaceae	Ceradenia	Ceradenia intricata	104083	40	15	5	5	3	EN	EN B2a	80	EN	LC or NT
Polypodiaceae	Ceradenia	Ceradenia jimenezii	32066.6	12	7	3	3	2	EN	EN B2a	57.1	EN	LC or NT
Polypodiaceae	Ceradenia	Ceradenia jungermannioides	9.31791e+06	560	189	53	85	37	LC or NT	LC or NT B1a+B2a	53.4	LC or NT	LC or NT
Polypodiaceae	Ceradenia	Ceradenia kalawayae	3130.1	24	12	4	3	3	LC or NT	EN B1a+B2a	100	EN	EN
Polypodiaceae	Ceradenia	Ceradenia kalbreyeri	5.5255e+06	416	137	55	65	32	LC or NT	LC or NT B1a+B2a	61.3	LC or NT	LC or NT
Polypodiaceae	Ceradenia	Ceradenia knightii	35437.2	24	9	5	6	5	VU	VU B2a	88.9	VU	LC or NT
Polypodiaceae	Ceradenia	Ceradenia kookenamae	1.81836e+06	84	25	18	17	8	LC or NT	LC or NT B1a+B2a	60	LC or NT	LC or NT
Polypodiaceae	Ceradenia	Ceradenia longipinnata	NA	4	1	1	1	0	CR	CR B2a	0	CR	NA
Polypodiaceae	Ceradenia	Ceradenia madidiensis	5173	20	14	4	4	4	LC or NT	EN B2a	100	EN	VU
Polypodiaceae	Ceradenia	Ceradenia margaritata	22799.1	16	7	3	4	2	EN	EN B2a	28.6	EN	LC or NT
Polypodiaceae	Ceradenia	Ceradenia marialta	NA	4	1	1	1	0	CR	CR B2a	0	CR	NA
Polypodiaceae	Ceradenia	Ceradenia mayoris	22635	20	5	4	5	1	EN	EN B2a	20	EN	LC or NT
Polypodiaceae	Ceradenia	Ceradenia melanopus	27732.5	40	13	7	8	2	VU	VU B2a	38.5	VU	LC or NT
Polypodiaceae	Ceradenia	Ceradenia meridensis	3.4568e+06	204	63	36	43	17	LC or NT	LC or NT B1a+B2a	41.3	LC or NT	LC or NT
Polypodiaceae	Ceradenia	Ceradenia microcystis	NA	4	1	1	1	1	LC or NT	LC or NT B2a	100	CR	NA
Polypodiaceae	Ceradenia	Ceradenia mirabilis	115230	20	7	5	5	1	EN	EN B2a	14.3	EN	LC or NT
Polypodiaceae	Ceradenia	Ceradenia nubigena	121069	28	10	5	6	5	VU	VU B2a	90	VU	LC or NT
Polypodiaceae	Ceradenia	Ceradenia oidiophora	32619	32	9	4	6	0	VU	VU B2a	0	VU	LC or NT
Polypodiaceae	Ceradenia	Ceradenia pearcei	6.2771e+06	372	137	34	54	18	LC or NT	LC or NT B1a+B2a	49.6	LC or NT	LC or NT
Polypodiaceae	Ceradenia	Ceradenia phalacron	NA	4	1	1	1	0	CR	CR B2a	0	CR	NA
Polypodiaceae	Ceradenia	Ceradenia phloiocharis	64219.4	28	10	4	5	4	EN	EN B2a	90	EN	LC or NT
Polypodiaceae	Ceradenia	Ceradenia pilipalaea	6.227e+06	328	118	28	46	16	LC or NT	LC or NT B1a+B2a	50.8	LC or NT	LC or NT
Polypodiaceae	Ceradenia	Ceradenia pilipecten	47394.2	24	9	6	6	4	VU	VU B2a	66.7	VU	LC or NT
Polypodiaceae	Ceradenia	Ceradenia pilipes	1.3791e+06	144	55	21	24	7	LC or NT	LC or NT B1a+B2a	54.5	LC or NT	LC or NT
Polypodiaceae	Ceradenia	Ceradenia podocarpa	9253.9	32	10	4	6	3	VU	VU B1a+B2a	70	VU	VU
Polypodiaceae	Ceradenia	Ceradenia pruinosa	2.1278e+06	36	12	7	7	5	VU	VU B2a	83.3	VU	LC or NT
Polypodiaceae	Ceradenia	Ceradenia semiadnata	55080.8	24	6	6	6	3	VU	VU B2a	50	VU	LC or NT
Polypodiaceae	Ceradenia	Ceradenia setosa	NA	4	2	1	1	1	LC or NT	LC or NT B2a	100	CR	NA
Polypodiaceae	Ceradenia	Ceradenia similis	14572	8	4	2	2	1	EN	EN B2a	50	EN	VU
Polypodiaceae	Ceradenia	Ceradenia spixiana	1.09503e+07	580	213	69	96	34	LC or NT	LC or NT B1a+B2a	50.2	LC or NT	LC or NT
Polypodiaceae	Ceradenia	Ceradenia tristis	2351	20	7	3	3	1	EN	EN B1a+B2a	71.4	EN	EN
Polypodiaceae	Ceradenia	Ceradenia tunquiniensis	6.06583e+06	308	110	26	43	14	LC or NT	LC or NT B1a+B2a	49.1	LC or NT	LC or NT
Polypodiaceae	Cochlidium	Cochlidium acrosorum	NA	4	2	1	1	1	LC or NT	LC or NT B2a	100	CR	NA
Polypodiaceae	Cochlidium	Cochlidium attenuatum	701824	160	51	16	13	7	LC or NT	LC or NT B1a+B2a	86.3	LC or NT	LC or NT
Polypodiaceae	Cochlidium	Cochlidium connellii	318800	140	45	25	18	10	LC or NT	LC or NT B1a+B2a	77.8	LC or NT	LC or NT
Polypodiaceae	Cochlidium	Cochlidium furcatum	7.81209e+06	508	175	61	75	25	LC or NT	LC or NT B1a+B2a	54.9	LC or NT	LC or NT
Polypodiaceae	Cochlidium	Cochlidium graminoides	NA	8	2	2	2	1	EN	EN B2a	50	EN	NA
Polypodiaceae	Cochlidium	Cochlidium jungens	390844	60	16	11	10	6	VU	VU B2a	75	VU	LC or NT
Polypodiaceae	Cochlidium	Cochlidium linearifolium	1.32539e+07	1240	413	168	222	88	LC or NT	LC or NT B1a+B2a	48.7	LC or NT	LC or NT
Polypodiaceae	Cochlidium	Cochlidium nervatum	NA	4	2	1	1	1	LC or NT	LC or NT B2a	100	CR	NA
Polypodiaceae	Cochlidium	Cochlidium proctorii	NA	4	1	1	1	0	CR	CR B2a	0	CR	NA
Polypodiaceae	Cochlidium	Cochlidium pumilum	9.23573e+06	380	137	38	56	22	LC or NT	LC or NT B1a+B2a	48.9	LC or NT	LC or NT
Polypodiaceae	Cochlidium	Cochlidium punctatum	1.26631e+07	1336	572	120	213	62	LC or NT	LC or NT B1a+B2a	46.7	LC or NT	LC or NT
Polypodiaceae	Cochlidium	Cochlidium rostratum	10723114	1032	350	89	155	64	LC or NT	LC or NT B1a+B2a	58.9	LC or NT	LC or NT
Polypodiaceae	Cochlidium	Cochlidium seminudum	235018	92	34	8	13	5	LC or NT	LC or NT B1a+B2a	64.7	LC or NT	LC or NT
Polypodiaceae	Cochlidium	Cochlidium serrulatum	1.39644e+07	4724	1676	480	763	239	LC or NT	LC or NT B1a+B2a	47	LC or NT	LC or NT
Polypodiaceae	Cochlidium	Cochlidium tepuiense	3.43888e+06	196	73	32	30	15	LC or NT	LC or NT B1a+B2a	58.9	LC or NT	LC or NT
Polypodiaceae	Cochlidium	Cochlidium wurdackii	98.9	12	4	1	1	1	LC or NT	CR B1a+B2a	100	CR	CR
Polypodiaceae	Ctenopterella	Ctenopterella blechnoides	NA	4	1	1	1	1	LC or NT	LC or NT B2a	100	CR	NA
Polypodiaceae	Ctenopterella	Ctenopterella denticulata	NA	4	1	1	1	0	CR	CR B2a	0	CR	NA
Polypodiaceae	Dictymia	Dictymia brownii	6.51589e+06	40	11	10	10	5	VU	VU B2a	54.5	VU	LC or NT
Polypodiaceae	Enterosora	Enterosora bishopii	11361.7	44	13	7	6	5	VU	VU B1a+B2a	84.6	VU	VU
Polypodiaceae	Enterosora	Enterosora campbellii	1.72059e+06	88	23	18	14	10	LC or NT	LC or NT B1a+B2a	78.3	LC or NT	LC or NT
Polypodiaceae	Enterosora	Enterosora ecostata	888004	136	40	18	26	8	LC or NT	LC or NT B1a+B2a	47.5	LC or NT	LC or NT
Polypodiaceae	Enterosora	Enterosora enterosoroides	5640.9	36	11	6	7	2	VU	VU B1a+B2a	36.4	VU	VU
Polypodiaceae	Enterosora	Enterosora insidiosa	4.42513e+06	68	18	16	15	8	LC or NT	LC or NT B1a+B2a	55.6	LC or NT	LC or NT
Polypodiaceae	Enterosora	Enterosora parietina	3.29945e+06	84	22	18	19	12	LC or NT	LC or NT B1a+B2a	68.2	LC or NT	LC or NT
Polypodiaceae	Enterosora	Enterosora percrassa	8428.2	104	36	9	15	5	LC or NT	LC or NT B1a+B2a	58.3	LC or NT	LC or NT
Polypodiaceae	Enterosora	Enterosora trichosora	6.70522e+06	360	125	34	53	19	LC or NT	LC or NT B1a+B2a	48.8	LC or NT	LC or NT
Polypodiaceae	Enterosora	Enterosora trifurcata	5.94204e+06	836	285	89	139	50	LC or NT	LC or NT B1a+B2a	49.1	LC or NT	LC or NT
Polypodiaceae	Enterosora	Enterosora werffii	85785.1	28	13	5	5	0	EN	EN B2a	0	EN	LC or NT
Polypodiaceae	Galactodenia	Galactodenia delicatula	8.35009e+06	416	136	44	62	22	LC or NT	LC or NT B1a+B2a	47.1	LC or NT	LC or NT
Polypodiaceae	Galactodenia	Galactodenia parrisiae	NA	4	1	1	1	1	LC or NT	LC or NT B2a	100	CR	NA
Polypodiaceae	Galactodenia	Galactodenia pumila	NA	4	1	1	1	1	LC or NT	LC or NT B2a	100	CR	NA
Polypodiaceae	Galactodenia	Galactodenia subscabra	8251080	496	165	50	74	28	LC or NT	LC or NT B1a+B2a	52.1	LC or NT	LC or NT
Polypodiaceae	Goniophlebium	Goniophlebium persicifolium	NA	8	2	2	2	0	EN	EN B2a	0	EN	NA
Polypodiaceae	Goniophlebium	Goniophlebium subauriculatum	NA	8	2	2	2	0	EN	EN B2a	0	EN	NA
Polypodiaceae	Goniophlebium	Goniophlebium terrestre	NA	4	1	1	1	1	LC or NT	LC or NT B2a	100	CR	NA
Polypodiaceae	Grammitis	Grammitis bryophila	9.65152e+06	648	217	75	101	45	LC or NT	LC or NT B1a+B2a	54.8	LC or NT	LC or NT
[truncated: 8,997 more rows]
